# Supplementary material for: Androgen Receptor-Target Genes in African American Prostate Cancer Disparities
Source: Hindawi journal article supplement (doi:10.1155/2013/763569), 2013-01-01
Supplement: f1 [file 763569.f1.zip]

Archive with 4 entries (3 files):
- 763569.f1/
- 763569.f1/Supplemental Table S3.xlsx
- 763569.f1/Supplemental Table S5.xlsx
- 763569.f1/Supplemental_Table_Figure S1-S8_121412_FINAL_bdw.pdf
