# Supplementary material for: Androgen Receptor-Target Genes in African American Prostate Cancer Disparities
Source: Hindawi journal article supplement (doi:10.1155/2013/763569), 2013-01-01
Supplement: f1 [file 763569.f1.zip › 763569.f1/Supplemental Table S3.xlsx]

## Sheet: AAcancer vs. AAnormal
Supplemental Table S3a. 1169 genes differentially expressed (2-way ANOVA, >1.5 fold changes) in AA cancer vs. AA matched-normal control.
gene_assignment	Gene Symbol	RefSeq	Fold-Change(AA tumor vs. AA normal)	Description (AA tumor vs. AA normal)
NM_032641 // SPSB2 // splA/ryanodine receptor domain and SOCS box containing 2 /	SPSB2	NM_032641	1.65705	tumor up vs normal
NM_005583 // LYL1 // lymphoblastic leukemia derived sequence 1 // 19p13.2 // 406	LYL1	NM_005583	-1.57955	tumor down vs normal
NM_004636 // SEMA3B // sema domain, immunoglobulin domain (Ig), short basic doma	SEMA3B	NM_004636	1.63125	tumor up vs normal
NM_006435 // IFITM2 // interferon induced transmembrane protein 2 (1-8D) // 11p1	IFITM2	NM_006435	1.83665	tumor up vs normal
NM_003500 // ACOX2 // acyl-CoA oxidase 2, branched chain // 3p14.3 // 8309 /// E	ACOX2	NM_003500	1.66088	tumor up vs normal
NM_014424 // HSPB7 // heat shock 27kDa protein family, member 7 (cardiovascular)	HSPB7	NM_014424	2.04891	tumor up vs normal
NM_017495 // RBM38 // RNA binding motif protein 38 // 20q13.31 // 55544 /// NM_1	RBM38	NM_017495	1.66184	tumor up vs normal
NM_000702 // ATP1A2 // ATPase, Na+/K+ transporting, alpha 2 polypeptide // 1q21-	ATP1A2	NM_000702	1.70279	tumor up vs normal
NM_000848 // GSTM2 // glutathione S-transferase mu 2 (muscle) // 1p13.3 // 2946	GSTM2	NM_000848	1.74457	tumor up vs normal
NM_152328 // ADSSL1 // adenylosuccinate synthase like 1 // 14q32.33 // 122622 //	ADSSL1	NM_152328	1.65655	tumor up vs normal
NM_019105 // TNXB // tenascin XB // 6p21.3 // 7148 /// NM_004381 // ATF6B // act	TNXB	NM_019105	1.60108	tumor up vs normal
NM_001174100 // PCBP4 // poly(rC) binding protein 4 // 3p21 // 57060 /// NM_0330	PCBP4	NM_001174100	1.64938	tumor up vs normal
NM_005876 // SPEG // SPEG complex locus // 2q35 // 10290 /// NM_001173476 // SPE	SPEG	NM_005876	1.7218	tumor up vs normal
NM_000655 // SELL // selectin L // 1q23-q25 // 6402 /// NR_029467 // SELL // sel	SELL	NM_000655	-1.96928	tumor down vs normal
NM_000239 // LYZ // lysozyme // 12q15 // 4069 /// ENST00000261267 // LYZ // lyso	LYZ	NM_000239	-2.90189	tumor down vs normal
NM_001008540 // CXCR4 // chemokine (C-X-C motif) receptor 4 // 2q21 // 7852 ///	CXCR4	NM_001008540	-1.85242	tumor down vs normal
NM_004415 // DSP // desmoplakin // 6p24 // 1832 /// NM_001008844 // DSP // desmo	DSP	NM_004415	-1.77096	tumor down vs normal
NM_001171610 // LDB3 // LIM domain binding 3 // 10q22.3-q23.2 // 11155 /// NM_00	LDB3	NM_001171610	1.6364	tumor up vs normal
NM_032995 // ARHGEF4 // Rho guanine nucleotide exchange factor (GEF) 4 // 2q22 /	ARHGEF4	NM_032995	1.54844	tumor up vs normal
NM_001774 // CD37 // CD37 molecule // 19q13.3 // 951 /// NM_001040031 // CD37 //	CD37	NM_001774	-1.75823	tumor down vs normal
NM_021192 // HOXD11 // homeobox D11 // 2q31.1 // 3237 /// ENST00000249504 // HOX	HOXD11	NM_021192	1.65669	tumor up vs normal
NM_005285 // NPBWR1 // neuropeptides B/W receptor 1 // 8p22-q21.13 // 2831 /// E	NPBWR1	NM_005285	-1.68116	tumor down vs normal
NM_012334 // MYO10 // myosin X // 5p15.1-p14.3 // 4651 /// ENST00000513610 // MY	MYO10	NM_012334	-1.62257	tumor down vs normal
NM_001142503 // STARD8 // StAR-related lipid transfer (START) domain containing	STARD8	NM_001142503	1.58854	tumor up vs normal
NR_026865 // C7orf13 // chromosome 7 open reading frame 13 // 7q36 // 129790 ///	C7orf13	NR_026865	-1.60222	tumor down vs normal
NM_004765 // BCL7C // B-cell CLL/lymphoma 7C // 16p11 // 9274 /// ENST0000021511	BCL7C	NM_004765	1.60842	tumor up vs normal
NM_020702 // KIAA1161 // KIAA1161 // 9p13.3 // 57462 /// ENST00000297625 // KIAA	KIAA1161	NM_020702	1.65922	tumor up vs normal
NM_013448 // BAZ1A // bromodomain adjacent to zinc finger domain, 1A // 14q13.2	BAZ1A	NM_013448	-1.6225	tumor down vs normal
ENST00000426318 // TRBV10-2 // T cell receptor beta variable 10-2 // 7q34 // 285	TRBV10-2	ENST00000426318	1.46481	tumor up vs normal
NM_024076 // KCTD15 // potassium channel tetramerisation domain containing 15 //	KCTD15	NM_024076	1.61046	tumor up vs normal
NM_006762 // LAPTM5 // lysosomal protein transmembrane 5 // 1p34 // 7805 /// ENS	LAPTM5	NM_006762	-1.81496	tumor down vs normal
NM_000397 // CYBB // cytochrome b-245, beta polypeptide // Xp21.1 // 1536 /// EN	CYBB	NM_000397	-1.83628	tumor down vs normal
NM_003302 // TRIP6 // thyroid hormone receptor interactor 6 // 7q22 // 7205 ///	TRIP6	NM_003302	1.69063	tumor up vs normal
NM_001134456 // FAM55C // family with sequence similarity 55, member C // 3q12.3	FAM55C	NM_001134456	1.59684	tumor up vs normal
NM_001025930 // TTLL3 // tubulin tyrosine ligase-like family, member 3 // 3p25.3	TTLL3	NM_001025930	1.61651	tumor up vs normal
NM_005609 // PYGM // phosphorylase, glycogen, muscle // 11q12-q13.2 // 5837 ///	PYGM	NM_005609	1.78315	tumor up vs normal
NM_020404 // CD248 // CD248 molecule, endosialin // 11q13 // 57124 /// ENST00000	CD248	NM_020404	1.71644	tumor up vs normal
NM_003045 // SLC7A1 // solute carrier family 7 (cationic amino acid transporter,	SLC7A1	NM_003045	-1.84947	tumor down vs normal
NM_002578 // PAK3 // p21 protein (Cdc42/Rac)-activated kinase 3 // Xq23 // 5063	PAK3	NM_002578	1.65396	tumor up vs normal
NM_002178 // IGFBP6 // insulin-like growth factor binding protein 6 // 12q13 //	IGFBP6	NM_002178	1.89315	tumor up vs normal
NM_020987 // ANK3 // ankyrin 3, node of Ranvier (ankyrin G) // 10q21 // 288 ///	ANK3	NM_020987	-1.7066	tumor down vs normal
NM_001275 // CHGA // chromogranin A (parathyroid secretory protein 1) // 14q32 /	CHGA	NM_001275	1.73891	tumor up vs normal
NM_172027 // ABTB1 // ankyrin repeat and BTB (POZ) domain containing 1 // 3q21 /	ABTB1	NM_172027	1.62191	tumor up vs normal
NM_001330 // CTF1 // cardiotrophin 1 // 16p11.2 // 1489 /// NM_001142544 // CTF1	CTF1	NM_001330	1.63208	tumor up vs normal
NM_005261 // GEM // GTP binding protein overexpressed in skeletal muscle // 8q13	GEM	NM_005261	1.74761	tumor up vs normal
NM_018125 // ARHGEF10L // Rho guanine nucleotide exchange factor (GEF) 10-like /	ARHGEF10L	NM_018125	1.60443	tumor up vs normal
NM_144653 // NACC2 // NACC family member 2, BEN and BTB (POZ) domain containing	NACC2	NM_144653	1.62779	tumor up vs normal
NM_022141 // PARVG // parvin, gamma // 22q13.31 // 64098 /// NM_001137605 // PAR	PARVG	NM_022141	-1.60097	tumor down vs normal
NM_020433 // JPH2 // junctophilin 2 // 20q13.12 // 57158 /// NM_175913 // JPH2 /	JPH2	NM_020433	1.6878	tumor up vs normal
NM_001746 // CANX // calnexin // 5q35 // 821 /// NM_001024649 // CANX // calnexi	CANX	NM_001746	-1.78746	tumor down vs normal
NM_014324 // AMACR // alpha-methylacyl-CoA racemase // 5p13 // 23600 /// NM_2033	AMACR	NM_014324	-3.04555	tumor down vs normal
NM_015873 // VILL // villin-like // 3p21.3 // 50853 /// ENST00000383759 // VILL	VILL	NM_015873	1.56394	tumor up vs normal
NM_181521 // CMTM4 // CKLF-like MARVEL transmembrane domain containing 4 // 16q2	CMTM4	NM_181521	-1.78233	tumor down vs normal
NM_024636 // STEAP4 // STEAP family member 4 // 7q21.12 // 79689 /// ENST0000038	STEAP4	NM_024636	-2.04611	tumor down vs normal
NM_005529 // HSPG2 // heparan sulfate proteoglycan 2 // 1p36.1-p34 // 3339 /// N	HSPG2	NM_005529	1.70911	tumor up vs normal
NM_020524 // PBXIP1 // pre-B-cell leukemia homeobox interacting protein 1 // 1q2	PBXIP1	NM_020524	1.67269	tumor up vs normal
NM_025040 // ZNF614 // zinc finger protein 614 // 19q13.41 // 80110 /// ENST0000	ZNF614	NM_025040	-1.73831	tumor down vs normal
NM_007124 // UTRN // utrophin // 6q24 // 7402 /// ENST00000367545 // UTRN // utr	UTRN	NM_007124	-1.73529	tumor down vs normal
NM_000825 // GNRH1 // gonadotropin-releasing hormone 1 (luteinizing-releasing ho	GNRH1	NM_000825	1.66328	tumor up vs normal
NM_015239 // AGTPBP1 // ATP/GTP binding protein 1 // 9q21.33 // 23287 /// ENST00	AGTPBP1	NM_015239	-1.62355	tumor down vs normal
NM_007118 // TRIO // triple functional domain (PTPRF interacting) // 5p15.2 // 7	TRIO	NM_007118	-1.55495	tumor down vs normal
NM_001755 // CBFB // core-binding factor, beta subunit // 16q22.1 // 865 /// NM_	CBFB	NM_001755	-1.71513	tumor down vs normal
NM_000612 // IGF2 // insulin-like growth factor 2 (somatomedin A) // 11p15.5 //	IGF2	NM_000612	1.95954	tumor up vs normal
NM_002603 // PDE7A // phosphodiesterase 7A // 8q13 // 5150 /// NM_002604 // PDE7	PDE7A	NM_002603	-1.67469	tumor down vs normal
NM_002104 // GZMK // granzyme K (granzyme 3; tryptase II) // 5q11.2 // 3003 ///	GZMK	NM_002104	-1.90526	tumor down vs normal
NM_000876 // IGF2R // insulin-like growth factor 2 receptor // 6q26 // 3482 ///	IGF2R	NM_000876	-1.62548	tumor down vs normal
NM_001136037 // LIMS2 // LIM and senescent cell antigen-like domains 2 // 2q14.3	LIMS2	NM_001136037	1.6372	tumor up vs normal
NM_004408 // DNM1 // dynamin 1 // 9q34 // 1759 /// NM_001005336 // DNM1 // dynam	DNM1	NM_004408	1.46868	tumor up vs normal
NM_033386 // MICALL1 // MICAL-like 1 // 22q13.1 // 85377 /// ENST00000215957 //	MICALL1	NM_033386	1.69721	tumor up vs normal
NM_003739 // AKR1C3 // aldo-keto reductase family 1, member C3 (3-alpha hydroxys	AKR1C3	NM_003739	1.69665	tumor up vs normal
NM_016368 // ISYNA1 // inositol-3-phosphate synthase 1 // 19p13.11 // 51477 ///	ISYNA1	NM_016368	1.64049	tumor up vs normal
NM_016299 // HSPA14 // heat shock 70kDa protein 14 // 10p13 // 51182 /// ENST000	HSPA14	NM_016299	-1.50861	tumor down vs normal
NM_000560 // CD53 // CD53 molecule // 1p13 // 963 /// NM_001040033 // CD53 // CD	CD53	NM_000560	-1.9627	tumor down vs normal
NM_004816 // FAM189A2 // family with sequence similarity 189, member A2 // 9q21.	FAM189A2	NM_004816	-1.76308	tumor down vs normal
NM_007375 // TARDBP // TAR DNA binding protein // 1p36.22 // 23435 /// ENST00000	TARDBP	NM_007375	-1.67581	tumor down vs normal
NM_000091 // COL4A3 // collagen, type IV, alpha 3 (Goodpasture antigen) // 2q36-	COL4A3	NM_000091	1.60332	tumor up vs normal
NM_018071 // ARHGEF40 // Rho guanine nucleotide exchange factor (GEF) 40 // 14q1	ARHGEF40	NM_018071	1.58747	tumor up vs normal
NM_014547 // TMOD3 // tropomodulin 3 (ubiquitous) // 15q21.1-q21.2 // 29766 ///	TMOD3	NM_014547	-1.6388	tumor down vs normal
NM_018349 // MCTP2 // multiple C2 domains, transmembrane 2 // 15q26.2 // 55784 /	MCTP2	NM_018349	-1.81875	tumor down vs normal
NM_016202 // ZNF580 // zinc finger protein 580 // 19q13.42 // 51157 /// NM_20711	ZNF580	NM_016202	1.68185	tumor up vs normal
NM_017885 // HCFC1R1 // host cell factor C1 regulator 1 (XPO1 dependent) // 16p1	HCFC1R1	NM_017885	1.6441	tumor up vs normal
NM_031288 // INO80B // INO80 complex subunit B // 2p13.1 // 83444 /// ENST000002	INO80B	NM_031288	1.63283	tumor up vs normal
NM_173491 // LSM11 // LSM11, U7 small nuclear RNA associated // 5q33.3 // 134353	LSM11	NM_173491	1.59452	tumor up vs normal
NM_080390 // TCEAL2 // transcription elongation factor A (SII)-like 2 // Xq22.1-	TCEAL2	NM_080390	2.0963	tumor up vs normal
NM_020367 // PARP11 // poly (ADP-ribose) polymerase family, member 11 // 12p13.3	PARP11	NM_020367	-1.58728	tumor down vs normal
NM_001081563 // DMPK // dystrophia myotonica-protein kinase // 19q13.3 // 1760 /	DMPK	NM_001081563	1.80053	tumor up vs normal
NM_001615 // ACTG2 // actin, gamma 2, smooth muscle, enteric // 2p13.1 // 72 ///	ACTG2	NM_001615	1.6924	tumor up vs normal
NM_207103 // C17orf87 // chromosome 17 open reading frame 87 // 17p13.2 // 38832	C17orf87	NM_207103	-1.81212	tumor down vs normal
NM_001172646 // PLCB4 // phospholipase C, beta 4 // 20p12 // 5332 /// NM_000933	PLCB4	NM_001172646	-1.60821	tumor down vs normal
NM_000161 // GCH1 // GTP cyclohydrolase 1 // 14q22.1-q22.2 // 2643 /// NM_001024	GCH1	NM_000161	-1.51785	tumor down vs normal
NM_003425 // ZNF45 // zinc finger protein 45 // 19q13.2 // 7596 /// ENST00000269	ZNF45	NM_003425	1.54882	tumor up vs normal
NM_005400 // PRKCE // protein kinase C, epsilon // 2p21 // 5581 /// ENST00000306	PRKCE	NM_005400	1.48114	tumor up vs normal
NM_006039 // MRC2 // mannose receptor, C type 2 // 17q23.2 // 9902 /// ENST00000	MRC2	NM_006039	1.57195	tumor up vs normal
NM_004431 // EPHA2 // EPH receptor A2 // 1p36 // 1969 /// ENST00000407976 // EPH	EPHA2	NM_004431	1.52571	tumor up vs normal
NM_004949 // DSC2 // desmocollin 2 // 18q12.1 // 1824 /// NM_024422 // DSC2 // d	DSC2	NM_004949	-1.75811	tumor down vs normal
NM_012113 // CA14 // carbonic anhydrase XIV // 1q21 // 23632 /// ENST00000369111	CA14	NM_012113	1.63194	tumor up vs normal
NM_002867 // RAB3B // RAB3B, member RAS oncogene family // 1p32-p31 // 5865 ///	RAB3B	NM_002867	-2.13787	tumor down vs normal
NM_015288 // PHF15 // PHD finger protein 15 // 5q31.1 // 23338 /// ENST000003950	PHF15	NM_015288	1.62466	tumor up vs normal
NM_000966 // RARG // retinoic acid receptor, gamma // 12q13 // 5916 /// NM_00104	RARG	NM_000966	1.563	tumor up vs normal
NM_002373 // MAP1A // microtubule-associated protein 1A // 15q15.3 // 4130 /// E	MAP1A	NM_002373	1.58057	tumor up vs normal
NM_006500 // MCAM // melanoma cell adhesion molecule // 11q23.3 // 4162 /// ENST	MCAM	NM_006500	1.75652	tumor up vs normal
NM_001017995 // SH3PXD2B // SH3 and PX domains 2B // 5q35.1 // 285590 /// ENST00	SH3PXD2B	NM_001017995	1.74349	tumor up vs normal
NM_022340 // ZFYVE20 // zinc finger, FYVE domain containing 20 // 3p25.1 // 6414	ZFYVE20	NM_022340	1.5645	tumor up vs normal
NM_000954 // PTGDS // prostaglandin D2 synthase 21kDa (brain) // 9q34.2-q34.3 //	PTGDS	NM_000954	2.0965	tumor up vs normal
NM_080552 // SLC32A1 // solute carrier family 32 (GABA vesicular transporter), m	SLC32A1	NM_080552	-1.48379	tumor down vs normal
NM_006741 // PPP1R1A // protein phosphatase 1, regulatory (inhibitor) subunit 1A	PPP1R1A	NM_006741	1.68941	tumor up vs normal
NM_017614 // BHMT2 // betaine--homocysteine S-methyltransferase 2 // 5q13 // 237	BHMT2	NM_017614	1.74059	tumor up vs normal
NM_032854 // CORO6 // coronin 6 // 17q11.2 // 84940 /// ENST00000345068 // CORO6	CORO6	NM_032854	1.52908	tumor up vs normal
NM_198839 // ACACA // acetyl-CoA carboxylase alpha // 17q21 // 31 /// NM_198834	ACACA	NM_198839	-1.81503	tumor down vs normal
NM_001778 // CD48 // CD48 molecule // 1q21.3-q22 // 962 /// ENST00000368046 // C	CD48	NM_001778	-1.87855	tumor down vs normal
NM_001004690 // OR2M5 // olfactory receptor, family 2, subfamily M, member 5 //	OR2M5	NM_001004690	1.90201	tumor up vs normal
NM_033201 // C16orf45 // chromosome 16 open reading frame 45 // 16p13.11 // 8992	C16orf45	NM_033201	1.67426	tumor up vs normal
NM_020921 // NIN // ninein (GSK3B interacting protein) // 14q22.1 // 51199 /// N	NIN	NM_020921	-1.57935	tumor down vs normal
NM_000922 // PDE3B // phosphodiesterase 3B, cGMP-inhibited // 11p15.1 // 5140 //	PDE3B	NM_000922	-1.79117	tumor down vs normal
NM_032902 // PPP1R16A // protein phosphatase 1, regulatory (inhibitor) subunit 1	PPP1R16A	NM_032902	1.52015	tumor up vs normal
NM_032515 // BOK // BCL2-related ovarian killer // 2q37.3 // 666 /// NR_033346 /	BOK	NM_032515	1.85249	tumor up vs normal
NM_022153 // C10orf54 // chromosome 10 open reading frame 54 // 10q22.1 // 64115	C10orf54	NM_022153	1.57647	tumor up vs normal
NM_004441 // EPHB1 // EPH receptor B1 // 3q21-q23 // 2047 /// ENST00000398015 //	EPHB1	NM_004441	1.61459	tumor up vs normal
NM_152695 // ZNF449 // zinc finger protein 449 // Xq26.3 // 203523 /// ENST00000	ZNF449	NM_152695	1.51106	tumor up vs normal
AK021795 // MGC24103 // hypothetical MGC24103 // 9p22.3 // 158295	MGC24103	AK021795	1.65392	tumor up vs normal
NM_000168 // GLI3 // GLI family zinc finger 3 // 7p13 // 2737 /// ENST0000039592	GLI3	NM_000168	1.67717	tumor up vs normal
NM_152755 // CNPY4 // canopy 4 homolog (zebrafish) // 7q22.1 // 245812 /// ENST0	CNPY4	NM_152755	1.60268	tumor up vs normal
NM_003335 // UBA7 // ubiquitin-like modifier activating enzyme 7 // 3p21 // 7318	UBA7	NM_003335	1.63538	tumor up vs normal
NM_000231 // SGCG // sarcoglycan, gamma (35kDa dystrophin-associated glycoprotei	SGCG	NM_000231	1.68006	tumor up vs normal
NM_018728 // MYO5C // myosin VC // 15q21 // 55930 /// ENST00000261839 // MYO5C /	MYO5C	NM_018728	-1.69404	tumor down vs normal
NM_203434 // IER5L // immediate early response 5-like // 9q34.11 // 389792 /// E	IER5L	NM_203434	1.54525	tumor up vs normal
NM_005031 // FXYD1 // FXYD domain containing ion transport regulator 1 // 19q13.	FXYD1	NM_005031	1.93901	tumor up vs normal
NM_001025616 // ARHGAP24 // Rho GTPase activating protein 24 // 4q22.1 // 83478	ARHGAP24	NM_001025616	1.61216	tumor up vs normal
NM_004100 // EYA4 // eyes absent homolog 4 (Drosophila) // 6q23 // 2070 /// NM_1	EYA4	NM_004100	1.62513	tumor up vs normal
NM_002503 // NFKBIB // nuclear factor of kappa light polypeptide gene enhancer i	NFKBIB	NM_002503	1.60794	tumor up vs normal
NM_024011 // CDK11A // cyclin-dependent kinase 11A // 1p36.33 // 728642 /// NM_0	CDK11A	NM_024011	1.6855	tumor up vs normal
NM_018310 // BRF2 // BRF2, subunit of RNA polymerase III transcription initiatio	BRF2	NM_018310	1.59659	tumor up vs normal
NM_024493 // ZKSCAN3 // zinc finger with KRAB and SCAN domains 3 // 6p22.1 // 80	ZKSCAN3	NM_024493	1.52543	tumor up vs normal
NM_025138 // C13orf23 // chromosome 13 open reading frame 23 // 13q13.3 // 80209	C13orf23	NM_025138	-1.58991	tumor down vs normal
NM_012157 // FBXL2 // F-box and leucine-rich repeat protein 2 // 3p22.3 // 25827	FBXL2	NM_012157	1.59379	tumor up vs normal
NM_025209 // EPC1 // enhancer of polycomb homolog 1 (Drosophila) // 10p11 // 803	EPC1	NM_025209	-1.55784	tumor down vs normal
NM_032549 // IMMP2L // IMP2 inner mitochondrial membrane peptidase-like (S. cere	IMMP2L	NM_032549	1.62529	tumor up vs normal
NM_024311 // MFSD11 // major facilitator superfamily domain containing 11 // 17q	MFSD11	NM_024311	-1.66121	tumor down vs normal
NM_031946 // AGAP3 // ArfGAP with GTPase domain, ankyrin repeat and PH domain 3	AGAP3	NM_031946	1.52867	tumor up vs normal
NR_026857 // FLJ90757 // hypothetical LOC440465 // 17q25.3 // 440465 /// ENST000	FLJ90757	NR_026857	1.54953	tumor up vs normal
NM_012449 // STEAP1 // six transmembrane epithelial antigen of the prostate 1 //	STEAP1	NM_012449	-1.72411	tumor down vs normal
NM_016240 // SCARA3 // scavenger receptor class A, member 3 // 8p21 // 51435 ///	SCARA3	NM_016240	1.58977	tumor up vs normal
NM_145306 // C10orf35 // chromosome 10 open reading frame 35 // 10q22.1 // 21973	C10orf35	NM_145306	-1.62214	tumor down vs normal
NR_034009 // SRSF6 // serine/arginine-rich splicing factor 6 // 20q12-q13.1 // 6	SRSF6	NR_034009	-1.69005	tumor down vs normal
NM_001172669 // ZNF668 // zinc finger protein 668 // 16p11.2 // 79759 /// NM_001	ZNF668	NM_001172669	1.50595	tumor up vs normal
NM_007112 // THBS3 // thrombospondin 3 // 1q21 // 7059 /// ENST00000368378 // TH	THBS3	NM_007112	1.56478	tumor up vs normal
NM_005128 // DOPEY2 // dopey family member 2 // 21q22.2 // 9980 /// ENST00000399	DOPEY2	NM_005128	-1.73954	tumor down vs normal
NM_020914 // RNF213 // ring finger protein 213 // 17q25.3 // 57674 /// ENST00000	RNF213	NM_020914	-1.6917	tumor down vs normal
NM_014689 // DOCK10 // dedicator of cytokinesis 10 // 2q36.2 // 55619 /// ENST00	DOCK10	NM_014689	-1.69305	tumor down vs normal
NM_004444 // EPHB4 // EPH receptor B4 // 7q22 // 2050 /// ENST00000358173 // EPH	EPHB4	NM_004444	1.56489	tumor up vs normal
NM_005409 // CXCL11 // chemokine (C-X-C motif) ligand 11 // 4q21.2 // 6373 /// E	CXCL11	NM_005409	-3.17897	tumor down vs normal
NM_178539 // FAM19A2 // family with sequence similarity 19 (chemokine (C-C motif	FAM19A2	NM_178539	1.70572	tumor up vs normal
NM_033421 // SNX21 // sorting nexin family member 21 // 20q13.12 // 90203 /// NM	SNX21	NM_033421	1.54629	tumor up vs normal
NM_145236 // B3GNT7 // UDP-GlcNAc:betaGal beta-1,3-N-acetylglucosaminyltransfera	B3GNT7	NM_145236	1.55428	tumor up vs normal
NM_001148 // ANK2 // ankyrin 2, neuronal // 4q25-q27 // 287 /// NM_001127493 //	ANK2	NM_001148	1.59736	tumor up vs normal
NM_001040000 // MLLT4 // myeloid/lymphoid or mixed-lineage leukemia (trithorax h	MLLT4	NM_001040000	-1.73088	tumor down vs normal
NM_014347 // ZNF324 // zinc finger protein 324 // 19q13.43 // 25799 /// NM_20739	ZNF324	NM_014347	1.64753	tumor up vs normal
NM_001039464 // C1orf175 // chromosome 1 open reading frame 175 // 1p32.3 // 374	C1orf175	NM_001039464	1.5576	tumor up vs normal
NM_001172223 // MOB2 // Mps one binder kinase activator-like 2 // 11p15.5 // 815	MOB2	NM_001172223	1.52499	tumor up vs normal
NM_006896 // HOXA7 // homeobox A7 // 7p15.2 // 3204 /// ENST00000242159 // HOXA7	HOXA7	NM_006896	1.68062	tumor up vs normal
NM_004036 // ADCY3 // adenylate cyclase 3 // 2p23.3 // 109 /// ENST00000260600 /	ADCY3	NM_004036	1.5612	tumor up vs normal
NM_005761 // PLXNC1 // plexin C1 // 12q23.3 // 10154 /// ENST00000258526 // PLXN	PLXNC1	NM_005761	-1.61454	tumor down vs normal
NM_199328 // CLDN8 // claudin 8 // 21q22.11 // 9073 /// ENST00000399899 // CLDN8	CLDN8	NM_199328	-1.68542	tumor down vs normal
NM_015208 // ANKRD12 // ankyrin repeat domain 12 // 18p11.22 // 23253 /// NM_001	ANKRD12	NM_015208	-1.69021	tumor down vs normal
NM_020690 // ANKHD1-EIF4EBP3 // ANKHD1-EIF4EBP3 readthrough // 5q31.3 // 404734	ANKHD1-EIF4EBP3	NM_020690	-1.58539	tumor down vs normal
NM_001565 // CXCL10 // chemokine (C-X-C motif) ligand 10 // 4q21 // 3627 /// ENS	CXCL10	NM_001565	-2.89866	tumor down vs normal
NM_015893 // PRLH // prolactin releasing hormone // 2q37.3 // 51052 /// ENST0000	PRLH	NM_015893	1.58494	tumor up vs normal
NM_004273 // CHST3 // carbohydrate (chondroitin 6) sulfotransferase 3 // 10q22.1	CHST3	NM_004273	1.60922	tumor up vs normal
NM_001130921 // RABL2B // RAB, member of RAS oncogene family-like 2B // 22q13.33	RABL2B	NM_001130921	-1.78385	tumor down vs normal
NM_144635 // FAM131A // family with sequence similarity 131, member A // 3q27.1	FAM131A	NM_144635	1.5408	tumor up vs normal
NM_005704 // PTPRU // protein tyrosine phosphatase, receptor type, U // 1p35.3 /	PTPRU	NM_005704	1.5503	tumor up vs normal
NM_002558 // P2RX1 // purinergic receptor P2X, ligand-gated ion channel, 1 // 17	P2RX1	NM_002558	1.68402	tumor up vs normal
NM_153689 // C2orf69 // chromosome 2 open reading frame 69 // 2q33.1 // 205327 /	C2orf69	NM_153689	-1.62187	tumor down vs normal
NM_203373 // FBXL22 // F-box and leucine-rich repeat protein 22 // 15q22.31 // 2	FBXL22	NM_203373	1.63092	tumor up vs normal
NM_178422 // PAQR7 // progestin and adipoQ receptor family member VII // 1p36.11	PAQR7	NM_178422	1.65826	tumor up vs normal
NM_032726 // PLCD4 // phospholipase C, delta 4 // 2q35 // 84812 /// ENST00000450	PLCD4	NM_032726	1.55471	tumor up vs normal
NM_002664 // PLEK // pleckstrin // 2p13.3 // 5341 /// ENST00000234313 // PLEK //	PLEK	NM_002664	-1.7368	tumor down vs normal
NM_021098 // CACNA1H // calcium channel, voltage-dependent, T type, alpha 1H sub	CACNA1H	NM_021098	1.67509	tumor up vs normal
AY358688 // LOC100133299 // GALI1870 // 5p15.2 // 100133299	LOC100133299	AY358688	-1.64182	tumor down vs normal
NR_027654 // SMAD6 // SMAD family member 6 // 15q21-q22 // 4091 /// NM_005585 //	SMAD6	NR_027654	1.61809	tumor up vs normal
NM_016422 // RNF141 // ring finger protein 141 // 11p15.4 // 50862 /// ENST00000	RNF141	NM_016422	-1.63468	tumor down vs normal
AK127183 // FLJ45248 // FLJ45248 protein // 8q22.3 // 401472	FLJ45248	AK127183	-1.51701	tumor down vs normal
NM_018181 // ZNF532 // zinc finger protein 532 // 18q21.32 // 55205 /// ENST0000	ZNF532	NM_018181	-1.70782	tumor down vs normal
---		---	-1.89441	tumor down vs normal
NR_027671 // UGGT1 // UDP-glucose glycoprotein glucosyltransferase 1 // 2q14.3 /	UGGT1	NR_027671	-1.64619	tumor down vs normal
NM_032413 // C15orf48 // chromosome 15 open reading frame 48 // 15q21.1 // 84419	C15orf48	NM_032413	-2.36558	tumor down vs normal
NM_174922 // ADCK5 // aarF domain containing kinase 5 // 8q24.3 // 203054 /// EN	ADCK5	NM_174922	1.54617	tumor up vs normal
NM_022160 // DMRTA1 // DMRT-like family A1 // 9p21.2 // 63951 /// ENST0000032587	DMRTA1	NM_022160	-1.59641	tumor down vs normal
NM_017748 // CWC25 // CWC25 spliceosome-associated protein homolog (S. cerevisia	CWC25	NM_017748	1.57038	tumor up vs normal
NM_003922 // HERC1 // hect (homologous to the E6-AP (UBE3A) carboxyl terminus) d	HERC1	NM_003922	-1.60744	tumor down vs normal
NM_001173464 // KIF21A // kinesin family member 21A // 12q12 // 55605 /// NM_017	KIF21A	NM_001173464	-1.64711	tumor down vs normal
NM_006332 // IFI30 // interferon, gamma-inducible protein 30 // 19p13.1 // 10437	IFI30	NM_006332	-2.17459	tumor down vs normal
NM_021217 // ZNF77 // zinc finger protein 77 // 19p13.3 // 58492 /// ENST0000031	ZNF77	NM_021217	-1.56457	tumor down vs normal
NM_178423 // HDAC9 // histone deacetylase 9 // 7p21.1 // 9734 /// NM_178425 // H	HDAC9	NM_178423	1.63857	tumor up vs normal
NM_014023 // WDR37 // WD repeat domain 37 // 10p15.3 // 22884 /// ENST0000035822	WDR37	NM_014023	-1.53357	tumor down vs normal
NM_138792 // LEO1 // Leo1, Paf1/RNA polymerase II complex component, homolog (S.	LEO1	NM_138792	-1.64696	tumor down vs normal
NM_001039582 // PNCK // pregnancy up-regulated non-ubiquitously expressed CaM ki	PNCK	NM_001039582	1.64419	tumor up vs normal
NM_001687 // ATP5D // ATP synthase, H+ transporting, mitochondrial F1 complex, d	ATP5D	NM_001687	1.70332	tumor up vs normal
NM_003055 // SLC18A3 // solute carrier family 18 (vesicular acetylcholine), memb	SLC18A3	NM_003055	-1.52641	tumor down vs normal
NM_016651 // DACT1 // dapper, antagonist of beta-catenin, homolog 1 (Xenopus lae	DACT1	NM_016651	1.60737	tumor up vs normal
NM_178172 // GPIHBP1 // glycosylphosphatidylinositol anchored high density lipop	GPIHBP1	NM_178172	1.53483	tumor up vs normal
NM_138420 // AHNAK2 // AHNAK nucleoprotein 2 // 14q32.33 // 113146 /// ENST00000	AHNAK2	NM_138420	1.82911	tumor up vs normal
NM_032385 // C5orf4 // chromosome 5 open reading frame 4 // 5q31-q32 // 10826 //	C5orf4	NM_032385	1.65082	tumor up vs normal
NM_005347 // HSPA5 // heat shock 70kDa protein 5 (glucose-regulated protein, 78k	HSPA5	NM_005347	-1.75916	tumor down vs normal
NM_006521 // TFE3 // transcription factor binding to IGHM enhancer 3 // Xp11.22	TFE3	NM_006521	1.57987	tumor up vs normal
NM_152588 // TMTC2 // transmembrane and tetratricopeptide repeat containing 2 //	TMTC2	NM_152588	-1.64541	tumor down vs normal
NM_032429 // LZTS2 // leucine zipper, putative tumor suppressor 2 // 10q24 // 84	LZTS2	NM_032429	1.64494	tumor up vs normal
NM_001135635 // C11orf68 // chromosome 11 open reading frame 68 // 11q13.1 // 83	C11orf68	NM_001135635	1.60882	tumor up vs normal
NM_144617 // HSPB6 // heat shock protein, alpha-crystallin-related, B6 // 19q13.	HSPB6	NM_144617	2.02873	tumor up vs normal
NM_001135704 // ACBD4 // acyl-CoA binding domain containing 4 // 17q21.31 // 797	ACBD4	NM_001135704	1.6338	tumor up vs normal
NM_032378 // EEF1D // eukaryotic translation elongation factor 1 delta (guanine	EEF1D	NM_032378	1.83634	tumor up vs normal
NM_001024210 // S100A13 // S100 calcium binding protein A13 // 1q21 // 6284 ///	S100A13	NM_001024210	1.78851	tumor up vs normal
NM_002291 // LAMB1 // laminin, beta 1 // 7q22 // 3912 /// ENST00000222399 // LAM	LAMB1	NM_002291	1.73097	tumor up vs normal
NM_014289 // CAPN6 // calpain 6 // Xq23 // 827 /// ENST00000324068 // CAPN6 // c	CAPN6	NM_014289	1.88472	tumor up vs normal
NM_032036 // IFI27L2 // interferon, alpha-inducible protein 27-like 2 // 14q32.1	IFI27L2	NM_032036	1.70423	tumor up vs normal
NM_183357 // ADCY5 // adenylate cyclase 5 // 3q13.2-q21 // 111 /// ENST000004628	ADCY5	NM_183357	1.60143	tumor up vs normal
NM_031459 // SESN2 // sestrin 2 // 1p35.3 // 83667 /// ENST00000253063 // SESN2	SESN2	NM_031459	1.48499	tumor up vs normal
NM_001171137 // STRBP // spermatid perinuclear RNA binding protein // 9q33.3 //	STRBP	NM_001171137	-1.54556	tumor down vs normal
NM_015684 // ATP5S // ATP synthase, H+ transporting, mitochondrial Fo complex, s	ATP5S	NM_015684	-1.55392	tumor down vs normal
NM_017610 // RNF111 // ring finger protein 111 // 15q21 // 54778 /// ENST0000034	RNF111	NM_017610	-1.95294	tumor down vs normal
NM_001098634 // RBM47 // RNA binding motif protein 47 // 4p14 // 54502 /// NM_01	RBM47	NM_001098634	-1.67013	tumor down vs normal
NM_005582 // CD180 // CD180 molecule // 5q12 // 4064 /// ENST00000256447 // CD18	CD180	NM_005582	-1.61693	tumor down vs normal
NM_001825 // CKMT2 // creatine kinase, mitochondrial 2 (sarcomeric) // 5q13.3 //	CKMT2	NM_001825	1.75179	tumor up vs normal
NM_177438 // DICER1 // dicer 1, ribonuclease type III // 14q32.13 // 23405 /// N	DICER1	NM_177438	-1.68715	tumor down vs normal
NM_022168 // IFIH1 // interferon induced with helicase C domain 1 // 2q24 // 641	IFIH1	NM_022168	-1.52215	tumor down vs normal
NM_005601 // NKG7 // natural killer cell group 7 sequence // 19q13.41 // 4818 //	NKG7	NM_005601	-1.70474	tumor down vs normal
NM_000853 // GSTT1 // glutathione S-transferase theta 1 // 22q11.23 // 2952 ///	GSTT1	NM_000853	1.94905	tumor up vs normal
NM_005453 // ZBTB22 // zinc finger and BTB domain containing 22 // 6p21.3 // 927	ZBTB22	NM_005453	1.55119	tumor up vs normal
NM_003680 // YARS // tyrosyl-tRNA synthetase // 1p35.1 // 8565 /// ENST000003734	YARS	NM_003680	-1.63626	tumor down vs normal
NM_004158 // PSPN // persephin // 19p13.3 // 5623 /// ENST00000245810 // PSPN //	PSPN	NM_004158	-1.63824	tumor down vs normal
NM_000949 // PRLR // prolactin receptor // 5p13.2 // 5618 /// ENST00000382002 //	PRLR	NM_000949	1.67829	tumor up vs normal
NM_152852 // MS4A6A // membrane-spanning 4-domains, subfamily A, member 6A // 11	MS4A6A	NM_152852	-1.66494	tumor down vs normal
NM_002185 // IL7R // interleukin 7 receptor // 5p13 // 3575 /// ENST00000303115	IL7R	NM_002185	-1.91045	tumor down vs normal
NM_015526 // CLIP3 // CAP-GLY domain containing linker protein 3 // 19q13.12 //	CLIP3	NM_015526	1.69004	tumor up vs normal
NM_032242 // PLXNA1 // plexin A1 // 3q21.3 // 5361 /// ENST00000393409 // PLXNA1	PLXNA1	NM_032242	1.52792	tumor up vs normal
NM_006274 // CCL19 // chemokine (C-C motif) ligand 19 // 9p13 // 6363 /// ENST00	CCL19	NM_006274	-2.37441	tumor down vs normal
NM_153703 // PODN // podocan // 1p32.3 // 127435 /// ENST00000312553 // PODN //	PODN	NM_153703	1.70136	tumor up vs normal
NR_033372 // BOD1P // biorientation of chromosomes in cell division 1 pseudogene	BOD1P	NR_033372	-1.50359	tumor down vs normal
NM_032582 // USP32 // ubiquitin specific peptidase 32 // 17q23.3 // 84669 /// EN	USP32	NM_032582	-1.5806	tumor down vs normal
NM_018240 // KIRREL // kin of IRRE like (Drosophila) // 1q21-q25 // 55243 /// EN	KIRREL	NM_018240	1.61595	tumor up vs normal
NM_018416 // FOXJ2 // forkhead box J2 // 12p13.31 // 55810 /// ENST00000162391 /	FOXJ2	NM_018416	1.54326	tumor up vs normal
NM_006852 // TLK2 // tousled-like kinase 2 // 17q23 // 11011 /// NM_001112707 //	TLK2	NM_006852	-1.5981	tumor down vs normal
NM_153370 // PI16 // peptidase inhibitor 16 // 6p21.2 // 221476 /// ENST00000373	PI16	NM_153370	2.07327	tumor up vs normal
NM_001010 // RPS6 // ribosomal protein S6 // 9p21 // 6194 /// ENST00000380394 //	RPS6	NM_001010	-1.81752	tumor down vs normal
NM_145799 // SEPT6 // septin 6 // Xq24 // 23157 /// NM_145800 // SEPT6 // septin	2012-09-06	NM_145799	-1.58348	tumor down vs normal
NR_003500 // RP9P // retinitis pigmentosa 9 pseudogene // 7p14.3 // 441212 /// N	RP9P	NR_003500	1.95125	tumor up vs normal
NM_002353 // TACSTD2 // tumor-associated calcium signal transducer 2 // 1p32 //	TACSTD2	NM_002353	-1.64704	tumor down vs normal
NM_024923 // NUP210 // nucleoporin 210kDa // 3p25.1 // 23225 /// ENST00000254508	NUP210	NM_024923	-1.58003	tumor down vs normal
NM_194272 // RBPMS2 // RNA binding protein with multiple splicing 2 // 15q22.31	RBPMS2	NM_194272	1.72855	tumor up vs normal
NM_001040440 // CCDC112 // coiled-coil domain containing 112 // 5q22.3 // 153733	CCDC112	NM_001040440	-1.56908	tumor down vs normal
NM_005515 // MNX1 // motor neuron and pancreas homeobox 1 // 7q36 // 3110 /// NM	MNX1	NM_005515	1.52817	tumor up vs normal
NM_001135218 // TAF12 // TAF12 RNA polymerase II, TATA box binding protein (TBP)	TAF12	NM_001135218	1.54067	tumor up vs normal
NM_001160305 // SETD6 // SET domain containing 6 // 16q21 // 79918 /// NM_024860	SETD6	NM_001160305	-1.55714	tumor down vs normal
NM_004669 // CLIC3 // chloride intracellular channel 3 // 9q34.3 // 9022 /// ENS	CLIC3	NM_004669	1.56307	tumor up vs normal
NM_001142685 // ARHGAP32 // Rho GTPase activating protein 32 // 11q24.3 // 9743	ARHGAP32	NM_001142685	-1.75007	tumor down vs normal
NM_000049 // ASPA // aspartoacylase // 17p13.3 // 443 /// NM_001128085 // ASPA /	ASPA	NM_000049	1.67821	tumor up vs normal
NM_001009944 // PKD1 // polycystic kidney disease 1 (autosomal dominant) // 16p1	PKD1	NM_001009944	1.6322	tumor up vs normal
NM_006774 // INMT // indolethylamine N-methyltransferase // 7p15.1 // 11185 ///	INMT	NM_006774	1.66862	tumor up vs normal
NM_001042496 // SLC12A6 // solute carrier family 12 (potassium/chloride transpor	SLC12A6	NM_001042496	-1.55061	tumor down vs normal
NM_006927 // ST3GAL2 // ST3 beta-galactoside alpha-2,3-sialyltransferase 2 // 16	ST3GAL2	NM_006927	1.56048	tumor up vs normal
NM_198480 // ZNF615 // zinc finger protein 615 // 19q13.41 // 284370 /// BC05388	ZNF615	NM_198480	-1.79112	tumor down vs normal
NM_024617 // ZCCHC6 // zinc finger, CCHC domain containing 6 // 9q21 // 79670 //	ZCCHC6	NM_024617	-1.78	tumor down vs normal
NR_026903 // AMZ2P1 // archaelysin family metallopeptidase 2 pseudogene 1 // 17q	AMZ2P1	NR_026903	1.61414	tumor up vs normal
NM_001911 // CTSG // cathepsin G // 14q11.2 // 1511 /// ENST00000216336 // CTSG	CTSG	NM_001911	1.59946	tumor up vs normal
NM_002616 // PER1 // period homolog 1 (Drosophila) // 17p13.1 // 5187 /// ENST00	PER1	NM_002616	1.55995	tumor up vs normal
NM_153832 // GPR161 // G protein-coupled receptor 161 // 1q24.2 // 23432 /// ENS	GPR161	NM_153832	1.57444	tumor up vs normal
NM_002889 // RARRES2 // retinoic acid receptor responder (tazarotene induced) 2	RARRES2	NM_002889	1.95609	tumor up vs normal
NM_138737 // HEPH // hephaestin // Xq11-q12 // 9843 /// NM_001130860 // HEPH //	HEPH	NM_138737	1.58596	tumor up vs normal
NM_024809 // TCTN2 // tectonic family member 2 // 12q24.31 // 79867 /// NM_00114	TCTN2	NM_024809	-1.56724	tumor down vs normal
NM_006001 // TUBA3C // tubulin, alpha 3c // 13q11 // 7278 /// NM_080386 // TUBA3	TUBA3C	NM_006001	-1.55795	tumor down vs normal
NM_003087 // SNCG // synuclein, gamma (breast cancer-specific protein 1) // 10q2	SNCG	NM_003087	1.59761	tumor up vs normal
NM_030810 // TXNDC5 // thioredoxin domain containing 5 (endoplasmic reticulum) /	TXNDC5	NM_030810	-1.64318	tumor down vs normal
NM_025098 // MOGAT2 // monoacylglycerol O-acyltransferase 2 // 11q13.5 // 80168	MOGAT2	NM_025098	1.9235	tumor up vs normal
NM_152332 // TC2N // tandem C2 domains, nuclear // 14q32.12 // 123036 /// NM_001	TC2N	NM_152332	-1.76775	tumor down vs normal
NM_003062 // SLIT3 // slit homolog 3 (Drosophila) // 5q35 // 6586 /// NR_029632	SLIT3	NM_003062	1.61532	tumor up vs normal
NM_198149 // SHISA4 // shisa homolog 4 (Xenopus laevis) // 1q32.1 // 149345 ///	SHISA4	NM_198149	1.63955	tumor up vs normal
NM_000726 // CACNB4 // calcium channel, voltage-dependent, beta 4 subunit // 2q2	CACNB4	NM_000726	1.58981	tumor up vs normal
NM_004079 // CTSS // cathepsin S // 1q21 // 1520 /// ENST00000368985 // CTSS //	CTSS	NM_004079	-1.78769	tumor down vs normal
NM_022817 // PER2 // period homolog 2 (Drosophila) // 2q37.3 // 8864 /// ENST000	PER2	NM_022817	1.50784	tumor up vs normal
NM_001042595 // TMEM91 // transmembrane protein 91 // 19q13.2 // 641649 /// NM_0	TMEM91	NM_001042595	1.51872	tumor up vs normal
NM_003258 // TK1 // thymidine kinase 1, soluble // 17q23.2-q25.3 // 7083 /// ENS	TK1	NM_003258	1.51057	tumor up vs normal
BC062571 // C1orf104 // chromosome 1 open reading frame 104 // 1q22 // 284618	C1orf104	BC062571	1.58164	tumor up vs normal
NM_054025 // B3GAT1 // beta-1,3-glucuronyltransferase 1 (glucuronosyltransferase	B3GAT1	NM_054025	-1.60423	tumor down vs normal
NM_018017 // C10orf118 // chromosome 10 open reading frame 118 // 10q25.3 // 550	C10orf118	NM_018017	-1.78854	tumor down vs normal
NM_001781 // CD69 // CD69 molecule // 12p13 // 969 /// NR_026672 // CD69 // CD69	CD69	NM_001781	-1.66366	tumor down vs normal
NM_032440 // LCOR // ligand dependent nuclear receptor corepressor // 10q24 // 8	LCOR	NM_032440	-1.557	tumor down vs normal
NM_152765 // C8orf46 // chromosome 8 open reading frame 46 // 8q13.1 // 254778 /	C8orf46	NM_152765	1.66474	tumor up vs normal
NM_181719 // TMCO4 // transmembrane and coiled-coil domains 4 // 1p36.13 // 2551	TMCO4	NM_181719	1.53405	tumor up vs normal
NM_199247 // CACNB1 // calcium channel, voltage-dependent, beta 1 subunit // 17q	CACNB1	NM_199247	1.53744	tumor up vs normal
NM_001040057 // FAM133B // family with sequence similarity 133, member B // 7q21	FAM133B	NM_001040057	-1.75637	tumor down vs normal
NM_016281 // TAOK3 // TAO kinase 3 // 12q // 51347 /// ENST00000392533 // TAOK3	TAOK3	NM_016281	-1.78382	tumor down vs normal
NM_032553 // GPR174 // G protein-coupled receptor 174 // Xq21.1 // 84636 /// ENS	GPR174	NM_032553	-1.74612	tumor down vs normal
NM_015621 // CCDC69 // coiled-coil domain containing 69 // 5q33.1 // 26112 /// E	CCDC69	NM_015621	1.68235	tumor up vs normal
NM_005557 // KRT16 // keratin 16 // 17q21.2 // 3868 /// NR_029393 // KRT16P3 //	KRT16	NM_005557	1.58868	tumor up vs normal
NM_002499 // NEO1 // neogenin 1 // 15q22.3-q23 // 4756 /// NM_001172624 // NEO1	NEO1	NM_002499	-1.69172	tumor down vs normal
NM_015311 // OBSL1 // obscurin-like 1 // 2q35 // 23363 /// NM_001173431 // OBSL1	OBSL1	NM_015311	1.72166	tumor up vs normal
NM_152478 // ZNF583 // zinc finger protein 583 // 19q13.43 // 147949 /// NM_0011	ZNF583	NM_152478	-1.54154	tumor down vs normal
NM_003206 // TCF21 // transcription factor 21 // 6pter-qter // 6943 /// NM_19839	TCF21	NM_003206	1.60187	tumor up vs normal
NM_005091 // PGLYRP1 // peptidoglycan recognition protein 1 // 19q13.2-q13.3 //	PGLYRP1	NM_005091	-1.44494	tumor down vs normal
NM_145238 // ZSCAN20 // zinc finger and SCAN domain containing 20 // 1p34.3 // 7	ZSCAN20	NM_145238	-1.7446	tumor down vs normal
NM_012235 // SCAP // SREBF chaperone // 3p21.31 // 22937 /// ENST00000265565 //	SCAP	NM_012235	1.55973	tumor up vs normal
NM_005994 // TBX2 // T-box 2 // 17q23 // 6909 /// AB209378 // TBX2 // T-box 2 //	TBX2	NM_005994	1.57423	tumor up vs normal
---		---	1.67559	tumor up vs normal
NM_004917 // KLK4 // kallikrein-related peptidase 4 // 19q13.41 // 9622 /// NR_0	KLK4	NM_004917	-1.7137	tumor down vs normal
NM_001163335 // SYTL5 // synaptotagmin-like 5 // Xp21.1 // 94122 /// NM_138780 /	SYTL5	NM_001163335	1.65815	tumor up vs normal
NM_016032 // ZDHHC9 // zinc finger, DHHC-type containing 9 // Xq26.1 // 51114 //	ZDHHC9	NM_016032	-1.82832	tumor down vs normal
NM_001174072 // SERINC5 // serine incorporator 5 // 5q14.1 // 256987 /// NM_1782	SERINC5	NM_001174072	-1.71406	tumor down vs normal
NM_022733 // SMAP2 // small ArfGAP2 // 1p35.3-p34.1 // 64744 /// ENST00000372718	SMAP2	NM_022733	-1.63142	tumor down vs normal
NM_001451 // FOXF1 // forkhead box F1 // 16q24 // 2294 /// U13219 // FOXF1 // fo	FOXF1	NM_001451	1.52146	tumor up vs normal
NM_133459 // CCBE1 // collagen and calcium binding EGF domains 1 // 18q21.32 //	CCBE1	NM_133459	1.50286	tumor up vs normal
NM_006526 // ZNF217 // zinc finger protein 217 // 20q13.2 // 7764 /// ENST000003	ZNF217	NM_006526	-1.67731	tumor down vs normal
NM_022121 // PERP // PERP, TP53 apoptosis effector // 6q24 // 64065 /// ENST0000	PERP	NM_022121	-1.71374	tumor down vs normal
NM_018142 // INTS10 // integrator complex subunit 10 // 8p21.3 // 55174 /// ENST	INTS10	NM_018142	-1.62448	tumor down vs normal
NM_053276 // VIT // vitrin // 2p22.2 // 5212 /// NM_001177969 // VIT // vitrin /	VIT	NM_053276	1.72152	tumor up vs normal
NM_134269 // SMTN // smoothelin // 22q12.2 // 6525 /// NM_134270 // SMTN // smoo	SMTN	NM_134269	1.75924	tumor up vs normal
NM_001193333 // CORO1A // coronin, actin binding protein, 1A // 16p11.2 // 11151	CORO1A	NM_001193333	-1.661	tumor down vs normal
NM_015345 // DAAM2 // dishevelled associated activator of morphogenesis 2 // 6p2	DAAM2	NM_015345	1.5644	tumor up vs normal
---		---	1.55873	tumor up vs normal
NM_001128303 // C13orf31 // chromosome 13 open reading frame 31 // 13q14.11 // 1	C13orf31	NM_001128303	-1.6113	tumor down vs normal
NM_021003 // PPM1A // protein phosphatase, Mg2+/Mn2+ dependent, 1A // 14q23.1 //	PPM1A	NM_021003	-1.67825	tumor down vs normal
NM_032236 // USP48 // ubiquitin specific peptidase 48 // 1p36.12 // 84196 /// NM	USP48	NM_032236	-1.60948	tumor down vs normal
NM_003724 // JRK // jerky homolog (mouse) // 8q24.3 // 8629 /// NM_001077527 //	JRK	NM_003724	1.5079	tumor up vs normal
NM_024513 // FYCO1 // FYVE and coiled-coil domain containing 1 // 3p21.31 // 794	FYCO1	NM_024513	1.57578	tumor up vs normal
NM_003558 // PIP5K1B // phosphatidylinositol-4-phosphate 5-kinase, type I, beta	PIP5K1B	NM_003558	1.49778	tumor up vs normal
NM_015888 // HOOK1 // hook homolog 1 (Drosophila) // 1p32.1 // 51361 /// ENST000	HOOK1	NM_015888	-1.6221	tumor down vs normal
NM_005775 // SORBS3 // sorbin and SH3 domain containing 3 // 8p21.3 // 10174 ///	SORBS3	NM_005775	1.59694	tumor up vs normal
NM_001145365 // ZNF652 // zinc finger protein 652 // 17q21.32 // 22834 /// NM_01	ZNF652	NM_001145365	-1.66139	tumor down vs normal
NM_001864 // COX7A1 // cytochrome c oxidase subunit VIIa polypeptide 1 (muscle)	COX7A1	NM_001864	1.70611	tumor up vs normal
NM_032875 // FBXL20 // F-box and leucine-rich repeat protein 20 // 17q12 // 8496	FBXL20	NM_032875	-1.48635	tumor down vs normal
NM_001304 // CPD // carboxypeptidase D // 17q11.2 // 1362 /// ENST00000225719 //	CPD	NM_001304	-1.7765	tumor down vs normal
NM_152687 // GAPT // GRB2-binding adaptor protein, transmembrane // 5q11.2 // 20	GAPT	NM_152687	-1.59713	tumor down vs normal
NM_001184819 // GNL3L // guanine nucleotide binding protein-like 3 (nucleolar)-l	GNL3L	NM_001184819	1.61228	tumor up vs normal
NM_001128219 // VGLL4 // vestigial like 4 (Drosophila) // 3p25.3 // 9686 /// NM_	VGLL4	NM_001128219	1.5688	tumor up vs normal
NM_001143820 // ETS1 // v-ets erythroblastosis virus E26 oncogene homolog 1 (avi	ETS1	NM_001143820	-1.64475	tumor down vs normal
NM_012398 // PIP5K1C // phosphatidylinositol-4-phosphate 5-kinase, type I, gamma	PIP5K1C	NM_012398	1.60331	tumor up vs normal
NM_004958 // MTOR // mechanistic target of rapamycin (serine/threonine kinase) /	MTOR	NM_004958	-1.61504	tumor down vs normal
NM_018485 // GPR77 // G protein-coupled receptor 77 // 19q13.33 // 27202 /// ENS	GPR77	NM_018485	1.55301	tumor up vs normal
NM_080875 // MIB2 // mindbomb homolog 2 (Drosophila) // 1p36.33 // 142678 /// NM	MIB2	NM_080875	1.49453	tumor up vs normal
NM_001195434 // MLF1 // myeloid leukemia factor 1 // 3q25.1 // 4291 /// NM_00113	MLF1	NM_001195434	1.60223	tumor up vs normal
NM_005028 // PIP4K2A // phosphatidylinositol-5-phosphate 4-kinase, type II, alph	PIP4K2A	NM_005028	-1.62777	tumor down vs normal
NM_182914 // SYNE2 // spectrin repeat containing, nuclear envelope 2 // 14q23.2	SYNE2	NM_182914	-1.60479	tumor down vs normal
NM_001135821 // FDPS // farnesyl diphosphate synthase // 1q22 // 2224 /// NM_002	FDPS	NM_001135821	1.58189	tumor up vs normal
NM_025202 // EFHD1 // EF-hand domain family, member D1 // 2q37.1 // 80303 /// NR	EFHD1	NM_025202	1.65522	tumor up vs normal
NM_018460 // ARHGAP15 // Rho GTPase activating protein 15 // 2q22.2-q22.3 // 558	ARHGAP15	NM_018460	-1.5989	tumor down vs normal
NM_020310 // MNT // MAX binding protein // 17p13.3 // 4335 /// ENST00000174618 /	MNT	NM_020310	1.51413	tumor up vs normal
NM_152309 // PIK3AP1 // phosphoinositide-3-kinase adaptor protein 1 // 10q24.1 /	PIK3AP1	NM_152309	-1.61694	tumor down vs normal
NM_017832 // C9orf6 // chromosome 9 open reading frame 6 // 9q31.3 // 54942 ///	C9orf6	NM_017832	-1.63064	tumor down vs normal
NM_145693 // LPIN1 // lipin 1 // 2p25.1 // 23175 /// ENST00000256720 // LPIN1 //	LPIN1	NM_145693	1.61069	tumor up vs normal
NM_000523 // HOXD13 // homeobox D13 // 2q31.1 // 3239 /// ENST00000392539 // HOX	HOXD13	NM_000523	1.80716	tumor up vs normal
NM_019855 // CABP5 // calcium binding protein 5 // 19q13.33 // 56344 /// ENST000	CABP5	NM_019855	1.481	tumor up vs normal
NM_052911 // ESCO1 // establishment of cohesion 1 homolog 1 (S. cerevisiae) // 1	ESCO1	NM_052911	-1.63243	tumor down vs normal
NM_000229 // LCAT // lecithin-cholesterol acyltransferase // 16q22.1 // 3931 ///	LCAT	NM_000229	1.59151	tumor up vs normal
NM_007281 // SCRG1 // stimulator of chondrogenesis 1 // 4q34.1 // 11341 /// ENST	SCRG1	NM_007281	1.84145	tumor up vs normal
NM_012400 // PLA2G2D // phospholipase A2, group IID // 1p36.12 // 26279 /// ENST	PLA2G2D	NM_012400	-1.54057	tumor down vs normal
NM_177925 // H2AFJ // H2A histone family, member J // 12p12 // 55766 /// NR_0277	H2AFJ	NM_177925	-1.77072	tumor down vs normal
NM_001007026 // ATN1 // atrophin 1 // 12p13.31 // 1822 /// NM_001940 // ATN1 //	ATN1	NM_001007026	1.71049	tumor up vs normal
NM_005013 // NUCB2 // nucleobindin 2 // 11p15.1 // 4925 /// ENST00000323688 // N	NUCB2	NM_005013	-1.81987	tumor down vs normal
NM_012238 // SIRT1 // sirtuin 1 // 10q21.3 // 23411 /// NM_001142498 // SIRT1 //	SIRT1	NM_012238	-1.64686	tumor down vs normal
NM_006209 // ENPP2 // ectonucleotide pyrophosphatase/phosphodiesterase 2 // 8q24	ENPP2	NM_006209	-1.84006	tumor down vs normal
NM_014643 // ZNF516 // zinc finger protein 516 // 18q23 // 9658 /// ENST00000443	ZNF516	NM_014643	1.64279	tumor up vs normal
NM_003692 // TMEFF1 // transmembrane protein with EGF-like and two follistatin-l	TMEFF1	NM_003692	1.55345	tumor up vs normal
NM_004726 // REPS2 // RALBP1 associated Eps domain containing 2 // Xp22.2 // 918	REPS2	NM_004726	-1.89699	tumor down vs normal
NM_212551 // LYSMD1 // LysM, putative peptidoglycan-binding, domain containing 1	LYSMD1	NM_212551	1.56824	tumor up vs normal
NM_001128930 // ENTPD4 // ectonucleoside triphosphate diphosphohydrolase 4 // 8p	ENTPD4	NM_001128930	-1.67769	tumor down vs normal
NM_130808 // CPNE4 // copine IV // 3q22.1 // 131034 /// ENST00000512055 // CPNE4	CPNE4	NM_130808	-1.72327	tumor down vs normal
NM_001130966 // TBXAS1 // thromboxane A synthase 1 (platelet) // 7q34-q35 // 691	TBXAS1	NM_001130966	-1.60976	tumor down vs normal
NM_013399 // C16orf5 // chromosome 16 open reading frame 5 // 16p13.3 // 29965 /	C16orf5	NM_013399	1.58418	tumor up vs normal
NR_027141 // FAM45B // family with sequence similarity 45, member A pseudogene /	FAM45B	NR_027141	1.59643	tumor up vs normal
NM_032802 // SPPL2A // signal peptide peptidase-like 2A // 15q21.2 // 84888 ///	SPPL2A	NM_032802	-1.79285	tumor down vs normal
NM_001165 // BIRC3 // baculoviral IAP repeat-containing 3 // 11q22 // 330 /// NM	BIRC3	NM_001165	-1.67436	tumor down vs normal
NM_001249 // ENTPD5 // ectonucleoside triphosphate diphosphohydrolase 5 // 14q24	ENTPD5	NM_001249	-1.94071	tumor down vs normal
NM_000675 // ADORA2A // adenosine A2a receptor // 22q11.23 // 135 /// X68486 //	ADORA2A	NM_000675	-1.5412	tumor down vs normal
NM_031220 // PITPNM3 // PITPNM family member 3 // 17p13 // 83394 /// NM_00116596	PITPNM3	NM_031220	1.53794	tumor up vs normal
NM_014326 // DAPK2 // death-associated protein kinase 2 // 15q22.31 // 23604 ///	DAPK2	NM_014326	1.64892	tumor up vs normal
NM_001191059 // PDE1C // phosphodiesterase 1C, calmodulin-dependent 70kDa // 7p1	PDE1C	NM_001191059	1.63675	tumor up vs normal
NM_000607 // ORM1 // orosomucoid 1 // 9q31-q32 // 5004 /// NM_000608 // ORM2 //	ORM1	NM_000607	-2.97405	tumor down vs normal
NM_006785 // MALT1 // mucosa associated lymphoid tissue lymphoma translocation g	MALT1	NM_006785	-1.69091	tumor down vs normal
NM_001031717 // CRELD1 // cysteine-rich with EGF-like domains 1 // 3p25.3 // 789	CRELD1	NM_001031717	1.61386	tumor up vs normal
NM_003758 // EIF3J // eukaryotic translation initiation factor 3, subunit J // 1	EIF3J	NM_003758	-1.72995	tumor down vs normal
NM_007156 // ZXDA // zinc finger, X-linked, duplicated A // Xp11.1 // 7789 /// N	ZXDA	NM_007156	-1.76264	tumor down vs normal
NM_006305 // ANP32A // acidic (leucine-rich) nuclear phosphoprotein 32 family, m	ANP32A	NM_006305	-1.76054	tumor down vs normal
NM_007109 // TCF19 // transcription factor 19 // 6p21.3 // 6941 /// NM_001077511	TCF19	NM_007109	1.5199	tumor up vs normal
NM_002843 // PTPRJ // protein tyrosine phosphatase, receptor type, J // 11p11.2	PTPRJ	NM_002843	-1.72571	tumor down vs normal
NM_005875 // EIF1B // eukaryotic translation initiation factor 1B // 3p22.1 // 1	EIF1B	NM_005875	1.55695	tumor up vs normal
NM_003888 // ALDH1A2 // aldehyde dehydrogenase 1 family, member A2 // 15q21.3 //	ALDH1A2	NM_003888	1.68364	tumor up vs normal
NR_003573 // ANXA2P2 // annexin A2 pseudogene 2 // 9p13 // 304 /// NM_004039 //	ANXA2P2	NR_003573	1.56181	tumor up vs normal
NM_030665 // RAI1 // retinoic acid induced 1 // 17p11.2 // 10743 /// ENST0000035	RAI1	NM_030665	1.55994	tumor up vs normal
NM_001001323 // ATP2B1 // ATPase, Ca++ transporting, plasma membrane 1 // 12q21.	ATP2B1	NM_001001323	-1.65806	tumor down vs normal
NM_001458 // FLNC // filamin C, gamma // 7q32-q35 // 2318 /// NM_001127487 // FL	FLNC	NM_001458	1.73859	tumor up vs normal
NM_004565 // PEX14 // peroxisomal biogenesis factor 14 // 1p36.22 // 5195 /// EN	PEX14	NM_004565	1.66435	tumor up vs normal
NM_020211 // RGMA // RGM domain family, member A // 15q26.1 // 56963 /// NM_0011	RGMA	NM_020211	1.55859	tumor up vs normal
NM_032777 // GPR124 // G protein-coupled receptor 124 // 8p11.23 // 25960 /// EN	GPR124	NM_032777	1.63243	tumor up vs normal
NM_001136499 // ZNF841 // zinc finger protein 841 // 19q13.41 // 284371 /// NM_0	ZNF841	NM_001136499	-1.59116	tumor down vs normal
NM_003268 // TLR5 // toll-like receptor 5 // 1q41-q42 // 7100 /// ENST0000036688	TLR5	NM_003268	-1.55436	tumor down vs normal
NM_080878 // ITLN2 // intelectin 2 // 1q22-q23 // 142683 /// ENST00000368029 //	ITLN2	NM_080878	1.5444	tumor up vs normal
NM_001142405 // SLMO1 // slowmo homolog 1 (Drosophila) // 18p11.21 // 10650 ///	SLMO1	NM_001142405	1.4909	tumor up vs normal
NM_001113756 // TYMP // thymidine phosphorylase // 22q13|22q13.33 // 1890 /// NM	TYMP	NM_001113756	-1.59737	tumor down vs normal
EF363480 // FAM168A // family with sequence similarity 168, member A // 11q13.4	FAM168A	EF363480	1.62508	tumor up vs normal
NM_006630 // ZNF234 // zinc finger protein 234 // 19q13.31 // 10780 /// NM_00114	ZNF234	NM_006630	-1.6238	tumor down vs normal
NM_001080409 // ZNF99 // zinc finger protein 99 // 19p12 // 7652 /// NM_00100141	ZNF99	NM_001080409	1.83463	tumor up vs normal
NM_014935 // PLEKHA6 // pleckstrin homology domain containing, family A member 6	PLEKHA6	NM_014935	1.55428	tumor up vs normal
NM_000626 // CD79B // CD79b molecule, immunoglobulin-associated beta // 17q23 //	CD79B	NM_000626	1.5822	tumor up vs normal
NM_001004756 // OR51M1 // olfactory receptor, family 51, subfamily M, member 1 /	OR51M1	NM_001004756	1.55723	tumor up vs normal
NM_001113567 // C17orf76 // chromosome 17 open reading frame 76 // 17p11.2 // 38	C17orf76	NM_001113567	1.56447	tumor up vs normal
NM_002583 // PAWR // PRKC, apoptosis, WT1, regulator // 12q21 // 5074 /// ENST00	PAWR	NM_002583	-1.64234	tumor down vs normal
NM_007144 // PCGF2 // polycomb group ring finger 2 // 17q12 // 7703 /// NM_00113	PCGF2	NM_007144	1.59979	tumor up vs normal
NM_018032 // LUC7L // LUC7-like (S. cerevisiae) // 16p13.3 // 55692 /// NM_20141	LUC7L	NM_018032	-1.51827	tumor down vs normal
NM_007068 // DMC1 // DMC1 dosage suppressor of mck1 homolog, meiosis-specific ho	DMC1	NM_007068	1.52495	tumor up vs normal
NM_022719 // DGCR14 // DiGeorge syndrome critical region gene 14 // 22q11.21|22q	DGCR14	NM_022719	1.55144	tumor up vs normal
NM_000877 // IL1R1 // interleukin 1 receptor, type I // 2q12 // 3554 /// ENST000	IL1R1	NM_000877	-1.78898	tumor down vs normal
NM_000683 // ADRA2C // adrenergic, alpha-2C-, receptor // 4p16 // 152 /// ENST00	ADRA2C	NM_000683	1.64091	tumor up vs normal
NM_032552 // DAB2IP // DAB2 interacting protein // 9q33.1-q33.3 // 153090 /// NM	DAB2IP	NM_032552	1.59783	tumor up vs normal
NM_006399 // BATF // basic leucine zipper transcription factor, ATF-like // 14q2	BATF	NM_006399	-1.54489	tumor down vs normal
NM_005170 // ASCL2 // achaete-scute complex homolog 2 (Drosophila) // 11p15.5 //	ASCL2	NM_005170	1.58801	tumor up vs normal
NM_000856 // GUCY1A3 // guanylate cyclase 1, soluble, alpha 3 // 4q31.3-q33|4q31	GUCY1A3	NM_000856	-1.73335	tumor down vs normal
NM_001144996 // ITGA7 // integrin, alpha 7 // 12q13 // 3679 /// NM_002206 // ITG	ITGA7	NM_001144996	1.66835	tumor up vs normal
NM_004136 // IREB2 // iron-responsive element binding protein 2 // 15q25.1 // 36	IREB2	NM_004136	-1.64567	tumor down vs normal
NM_005110 // GFPT2 // glutamine-fructose-6-phosphate transaminase 2 // 5q34-q35	GFPT2	NM_005110	1.51812	tumor up vs normal
NM_001928 // CFD // complement factor D (adipsin) // 19p13.3 // 1675 /// ENST000	CFD	NM_001928	1.77255	tumor up vs normal
NM_001134338 // RNF24 // ring finger protein 24 // 20p13 // 11237 /// NM_0011343	RNF24	NM_001134338	-1.57097	tumor down vs normal
NM_007315 // STAT1 // signal transducer and activator of transcription 1, 91kDa	STAT1	NM_007315	-1.75174	tumor down vs normal
NM_006282 // STK4 // serine/threonine kinase 4 // 20q11.2-q13.2 // 6789 /// ENST	STK4	NM_006282	-1.5724	tumor down vs normal
NM_002989 // CCL21 // chemokine (C-C motif) ligand 21 // 9p13 // 6366 /// ENST00	CCL21	NM_002989	1.83799	tumor up vs normal
NM_002223 // ITPR2 // inositol 1,4,5-triphosphate receptor, type 2 // 12p11 // 3	ITPR2	NM_002223	-1.75169	tumor down vs normal
NM_001093 // ACACB // acetyl-CoA carboxylase beta // 12q24.11 // 32 /// ENST0000	ACACB	NM_001093	1.60604	tumor up vs normal
NM_005830 // MRPS31 // mitochondrial ribosomal protein S31 // 13q14.11 // 10240	MRPS31	NM_005830	-1.60608	tumor down vs normal
NM_003098 // SNTA1 // syntrophin, alpha 1 (dystrophin-associated protein A1, 59k	SNTA1	NM_003098	1.59027	tumor up vs normal
NM_006149 // LGALS4 // lectin, galactoside-binding, soluble, 4 // 19q13.2 // 396	LGALS4	NM_006149	1.70999	tumor up vs normal
NM_139278 // LGI3 // leucine-rich repeat LGI family, member 3 // 8p21.3 // 20319	LGI3	NM_139278	1.54451	tumor up vs normal
NR_026691 // IL10RA // interleukin 10 receptor, alpha // 11q23 // 3587 /// NM_00	IL10RA	NR_026691	-1.58316	tumor down vs normal
NM_017694 // MFSD6 // major facilitator superfamily domain containing 6 // 2q32.	MFSD6	NM_017694	-1.60572	tumor down vs normal
NM_001006946 // SDC1 // syndecan 1 // 2p24.1 // 6382 /// NM_002997 // SDC1 // sy	SDC1	NM_001006946	1.83603	tumor up vs normal
NM_004468 // FHL3 // four and a half LIM domains 3 // 1p34 // 2275 /// ENST00000	FHL3	NM_004468	1.60481	tumor up vs normal
NM_001080467 // MYO5B // myosin VB // 18q21 // 4645 /// ENST00000285039 // MYO5B	MYO5B	NM_001080467	-1.64571	tumor down vs normal
NM_005547 // IVL // involucrin // 1q21 // 3713 /// ENST00000368764 // IVL // inv	IVL	NM_005547	1.54612	tumor up vs normal
NM_032857 // LACTB // lactamase, beta // 15q22.1 // 114294 /// NM_171846 // LACT	LACTB	NM_032857	-1.59641	tumor down vs normal
NM_001003802 // SMARCD3 // SWI/SNF related, matrix associated, actin dependent r	SMARCD3	NM_001003802	1.64746	tumor up vs normal
NM_021128 // POLR2L // polymerase (RNA) II (DNA directed) polypeptide L, 7.6kDa	POLR2L	NM_021128	1.60044	tumor up vs normal
NM_002653 // PITX1 // paired-like homeodomain 1 // 5q31 // 5307 /// ENST00000265	PITX1	NM_002653	1.50944	tumor up vs normal
NM_145233 // ZNF625 // zinc finger protein 625 // 19p13.2 // 90589 /// ENST00000	ZNF625	NM_145233	1.57976	tumor up vs normal
NM_001218 // CA12 // carbonic anhydrase XII // 15q22 // 771 /// NM_206925 // CA1	CA12	NM_001218	1.53458	tumor up vs normal
NM_001312 // CRIP2 // cysteine-rich protein 2 // 14q32.3 // 1397 /// ENST0000032	CRIP2	NM_001312	1.71919	tumor up vs normal
NM_004429 // EFNB1 // ephrin-B1 // Xq12 // 1947 /// ENST00000204961 // EFNB1 //	EFNB1	NM_004429	1.5416	tumor up vs normal
NM_017607 // PPP1R12C // protein phosphatase 1, regulatory (inhibitor) subunit 1	PPP1R12C	NM_017607	1.76449	tumor up vs normal
NM_176787 // PIGN // phosphatidylinositol glycan anchor biosynthesis, class N //	PIGN	NM_176787	-1.71287	tumor down vs normal
NM_002133 // HMOX1 // heme oxygenase (decycling) 1 // 22q12|22q13.1 // 3162 ///	HMOX1	NM_002133	-1.51178	tumor down vs normal
NM_003358 // UGCG // UDP-glucose ceramide glucosyltransferase // 9q31 // 7357 //	UGCG	NM_003358	-1.71226	tumor down vs normal
NM_032525 // TUBB6 // tubulin, beta 6 // 18p11.21 // 84617 /// ENST00000317702 /	TUBB6	NM_032525	1.65987	tumor up vs normal
NM_001184902 // CARD8 // caspase recruitment domain family, member 8 // 19q13.33	CARD8	NM_001184902	-1.54722	tumor down vs normal
NM_004181 // UCHL1 // ubiquitin carboxyl-terminal esterase L1 (ubiquitin thioles	UCHL1	NM_004181	1.78331	tumor up vs normal
NM_001767 // CD2 // CD2 molecule // 1p13.1 // 914 /// ENST00000369478 // CD2 //	CD2	NM_001767	-1.65644	tumor down vs normal
NM_031283 // TCF7L1 // transcription factor 7-like 1 (T-cell specific, HMG-box)	TCF7L1	NM_031283	1.62719	tumor up vs normal
NM_022135 // POPDC2 // popeye domain containing 2 // 3q13.33 // 64091 /// ENST00	POPDC2	NM_022135	1.7942	tumor up vs normal
NM_024945 // RMI1 // RMI1, RecQ mediated genome instability 1, homolog (S. cerev	RMI1	NM_024945	-1.61827	tumor down vs normal
NM_024697 // ZNF385D // zinc finger protein 385D // 3p24.3 // 79750 /// ENST0000	ZNF385D	NM_024697	1.71993	tumor up vs normal
NM_003201 // TFAM // transcription factor A, mitochondrial // 10q21 // 7019 ///	TFAM	NM_003201	-1.6948	tumor down vs normal
NM_001042454 // TGFB1I1 // transforming growth factor beta 1 induced transcript	TGFB1I1	NM_001042454	1.74689	tumor up vs normal
NM_005065 // SEL1L // sel-1 suppressor of lin-12-like (C. elegans) // 14q31 // 6	SEL1L	NM_005065	-1.76385	tumor down vs normal
NM_003461 // ZYX // zyxin // 7q32 // 7791 /// NM_001010972 // ZYX // zyxin // 7q	ZYX	NM_003461	1.69204	tumor up vs normal
NM_020062 // SLC2A4RG // SLC2A4 regulator // 20q13.33 // 56731 /// ENST000002660	SLC2A4RG	NM_020062	1.59082	tumor up vs normal
NM_014711 // CP110 // CP110 protein // 16p12.3 // 9738 /// ENST00000396212 // CP	CP110	NM_014711	-1.58928	tumor down vs normal
NM_024953 // NAA25 // N(alpha)-acetyltransferase 25, NatB auxiliary subunit // 1	NAA25	NM_024953	-1.52226	tumor down vs normal
NM_145044 // ZNF501 // zinc finger protein 501 // 3p21.31 // 115560 /// ENST0000	ZNF501	NM_145044	1.57104	tumor up vs normal
NM_001178106 // ZNF185 // zinc finger protein 185 (LIM domain) // Xq28 // 7739 /	ZNF185	NM_001178106	1.63268	tumor up vs normal
NM_002239 // KCNJ3 // potassium inwardly-rectifying channel, subfamily J, member	KCNJ3	NM_002239	1.82781	tumor up vs normal
NM_006294 // UQCRB // ubiquinol-cytochrome c reductase binding protein // 8q22 /	UQCRB	NM_006294	1.66275	tumor up vs normal
NR_004859 // SCAND2 // SCAN domain containing 2 pseudogene // 15q25-q26 // 54581	SCAND2	NR_004859	1.59292	tumor up vs normal
NM_020700 // PPM1H // protein phosphatase, Mg2+/Mn2+ dependent, 1H // 12q14.1 //	PPM1H	NM_020700	-1.69639	tumor down vs normal
NM_181351 // NCAM1 // neural cell adhesion molecule 1 // 11q23.1 // 4684 /// NM_	NCAM1	NM_181351	1.84076	tumor up vs normal
NM_014786 // ARHGEF17 // Rho guanine nucleotide exchange factor (GEF) 17 // 11q1	ARHGEF17	NM_014786	1.61232	tumor up vs normal
NM_152906 // C22orf25 // chromosome 22 open reading frame 25 // 22q11.21 // 1289	C22orf25	NM_152906	1.53271	tumor up vs normal
NM_005828 // DCAF7 // DDB1 and CUL4 associated factor 7 // 17q23.3 // 10238 ///	DCAF7	NM_005828	-1.58946	tumor down vs normal
NM_153369 // KIAA1919 // KIAA1919 // 6q22 // 91749 /// ENST00000368847 // KIAA19	KIAA1919	NM_153369	-1.74957	tumor down vs normal
NM_138383 // MTSS1L // metastasis suppressor 1-like // 16q22.1 // 92154 /// ENST	MTSS1L	NM_138383	1.6395	tumor up vs normal
NM_001164 // APBB1 // amyloid beta (A4) precursor protein-binding, family B, mem	APBB1	NM_001164	1.57514	tumor up vs normal
NM_001465 // FYB // FYN binding protein // 5p13.1 // 2533 /// NM_199335 // FYB /	FYB	NM_001465	-1.59795	tumor down vs normal
NM_021047 // ZNF253 // zinc finger protein 253 // 19p13.11 // 56242 /// ENST0000	ZNF253	NM_021047	-1.68081	tumor down vs normal
NM_152227 // SNX5 // sorting nexin 5 // 20p11 // 27131 /// NM_014426 // SNX5 //	SNX5	NM_152227	-1.60937	tumor down vs normal
NM_015897 // PIAS4 // protein inhibitor of activated STAT, 4 // 19p13.3 // 51588	PIAS4	NM_015897	1.50198	tumor up vs normal
NM_017551 // GRID1 // glutamate receptor, ionotropic, delta 1 // 10q22 // 2894 /	GRID1	NM_017551	1.49659	tumor up vs normal
NM_023944 // CYP4F12 // cytochrome P450, family 4, subfamily F, polypeptide 12 /	CYP4F12	NM_023944	1.61784	tumor up vs normal
NM_019845 // RPRM // reprimo, TP53 dependent G2 arrest mediator candidate // 2q2	RPRM	NM_019845	1.58134	tumor up vs normal
NM_001085 // SERPINA3 // serpin peptidase inhibitor, clade A (alpha-1 antiprotei	SERPINA3	NM_001085	-2.83697	tumor down vs normal
NM_003966 // SEMA5A // sema domain, seven thrombospondin repeats (type 1 and typ	SEMA5A	NM_003966	1.69831	tumor up vs normal
NM_016536 // ZNF571 // zinc finger protein 571 // 19q13.12 // 51276 /// ENST0000	ZNF571	NM_016536	-1.53693	tumor down vs normal
NM_177968 // PPM1B // protein phosphatase, Mg2+/Mn2+ dependent, 1B // 2p21 // 54	PPM1B	NM_177968	-1.6702	tumor down vs normal
NM_005943 // MOCS1 // molybdenum cofactor synthesis 1 // 6p21.3 // 4337 /// NM_0	MOCS1	NM_005943	1.5363	tumor up vs normal
NM_005767 // LPAR6 // lysophosphatidic acid receptor 6 // 13q14 // 10161 /// NM_	LPAR6	NM_005767	-1.69497	tumor down vs normal
NM_000894 // LHB // luteinizing hormone beta polypeptide // 19q13.32 // 3972 ///	LHB	NM_000894	1.59363	tumor up vs normal
NM_001130048 // DOCK9 // dedicator of cytokinesis 9 // 13q32.3 // 23348 /// NM_0	DOCK9	NM_001130048	-1.59719	tumor down vs normal
NM_001018090 // GCOM1 // GRINL1A complex locus // 15q21.3 // 145781 /// NM_00101	GCOM1	NM_001018090	1.59261	tumor up vs normal
NM_032494 // ZC3H8 // zinc finger CCCH-type containing 8 // 2q13 // 84524 /// EN	ZC3H8	NM_032494	-1.60208	tumor down vs normal
NM_025220 // ADAM33 // ADAM metallopeptidase domain 33 // 20p13 // 80332 /// NM_	ADAM33	NM_025220	1.53776	tumor up vs normal
NM_052942 // GBP5 // guanylate binding protein 5 // 1p22.2 // 115362 /// NM_0011	GBP5	NM_052942	-1.70856	tumor down vs normal
NM_003369 // UVRAG // UV radiation resistance associated gene // 11q13.5 // 7405	UVRAG	NM_003369	-1.60444	tumor down vs normal
NM_006103 // WFDC2 // WAP four-disulfide core domain 2 // 20q12-q13.2 // 10406 /	WFDC2	NM_006103	1.68213	tumor up vs normal
NM_001005388 // NFASC // neurofascin // 1q32.1 // 23114 /// NM_001160332 // NFAS	NFASC	NM_001005388	1.62372	tumor up vs normal
NM_002346 // LY6E // lymphocyte antigen 6 complex, locus E // 8q24.3 // 4061 ///	LY6E	NM_002346	1.76982	tumor up vs normal
NM_017922 // PRPF39 // PRP39 pre-mRNA processing factor 39 homolog (S. cerevisia	PRPF39	NM_017922	-1.59265	tumor down vs normal
NM_152342 // CDYL2 // chromodomain protein, Y-like 2 // 16q23.2 // 124359 /// EN	CDYL2	NM_152342	-1.67441	tumor down vs normal
NM_002246 // KCNK3 // potassium channel, subfamily K, member 3 // 2p23 // 3777 /	KCNK3	NM_002246	1.60779	tumor up vs normal
---		---	1.64009	tumor up vs normal
NM_003286 // TOP1 // topoisomerase (DNA) I // 20q12-q13.1 // 7150 /// NR_002719	TOP1	NM_003286	-1.76301	tumor down vs normal
NM_005619 // RTN2 // reticulon 2 // 19q13.32 // 6253 /// NM_206900 // RTN2 // re	RTN2	NM_005619	1.54346	tumor up vs normal
NM_003944 // SELENBP1 // selenium binding protein 1 // 1q21.3 // 8991 /// ENST00	SELENBP1	NM_003944	1.92913	tumor up vs normal
NM_002281 // KRT81 // keratin 81 // 12q13 // 3887 /// NM_002284 // KRT86 // kera	KRT81	NM_002281	-1.52849	tumor down vs normal
NM_015266 // SLC9A8 // solute carrier family 9 (sodium/hydrogen exchanger), memb	SLC9A8	NM_015266	-1.52303	tumor down vs normal
NM_013233 // STK39 // serine threonine kinase 39 // 2q24.3 // 27347 /// ENST0000	STK39	NM_013233	-1.69392	tumor down vs normal
NM_005810 // KLRG1 // killer cell lectin-like receptor subfamily G, member 1 //	KLRG1	NM_005810	-1.59919	tumor down vs normal
NM_022474 // MPP5 // membrane protein, palmitoylated 5 (MAGUK p55 subfamily memb	MPP5	NM_022474	-1.68931	tumor down vs normal
NM_007351 // MMRN1 // multimerin 1 // 4q22 // 22915 /// ENST00000394980 // MMRN1	MMRN1	NM_007351	1.6665	tumor up vs normal
NM_000968 // RPL4 // ribosomal protein L4 // 15q22 // 6124 /// ENST00000307961 /	RPL4	NM_000968	2.29722	tumor up vs normal
NM_014704 // KIAA0562 // KIAA0562 // 1p36.32 // 9731 /// ENST00000378230 // KIAA	KIAA0562	NM_014704	-1.51348	tumor down vs normal
NM_001109662 // C12orf51 // chromosome 12 open reading frame 51 // 12q24.13 // 2	C12orf51	NM_001109662	-1.69278	tumor down vs normal
NM_001135215 // ZNF323 // zinc finger protein 323 // 6p21.31|6p22.3-p22.1 // 642	ZNF323	NM_001135215	1.52225	tumor up vs normal
NM_017949 // CUEDC1 // CUE domain containing 1 // 17q23.2 // 404093 /// ENST0000	CUEDC1	NM_017949	1.50073	tumor up vs normal
NM_000733 // CD3E // CD3e molecule, epsilon (CD3-TCR complex) // 11q23 // 916 //	CD3E	NM_000733	-1.66004	tumor down vs normal
NM_033025 // SYDE1 // synapse defective 1, Rho GTPase, homolog 1 (C. elegans) //	SYDE1	NM_033025	1.52585	tumor up vs normal
NM_001001936 // AFAP1L2 // actin filament associated protein 1-like 2 // 10q25.3	AFAP1L2	NM_001001936	1.57969	tumor up vs normal
NM_005845 // ABCC4 // ATP-binding cassette, sub-family C (CFTR/MRP), member 4 //	ABCC4	NM_005845	-1.95474	tumor down vs normal
NM_022574 // GIGYF1 // GRB10 interacting GYF protein 1 // 7q22 // 64599 /// ENST	GIGYF1	NM_022574	1.54218	tumor up vs normal
NM_203447 // DOCK8 // dedicator of cytokinesis 8 // 9p24.3 // 81704 /// NM_00119	DOCK8	NM_203447	-1.57297	tumor down vs normal
NM_152600 // ZNF579 // zinc finger protein 579 // 19q13.42 // 163033 /// ENST000	ZNF579	NM_152600	1.59519	tumor up vs normal
NM_138468 // ICA1L // islet cell autoantigen 1,69kDa-like // 2q33.2 // 130026 //	ICA1L	NM_138468	1.56972	tumor up vs normal
NR_002730 // BRD7P3 // bromodomain containing 7 pseudogene 3 // 6q22.31 // 23629	BRD7P3	NR_002730	1.48078	tumor up vs normal
NM_000046 // ARSB // arylsulfatase B // 5q11-q13 // 411 /// NM_198709 // ARSB //	ARSB	NM_000046	1.52319	tumor up vs normal
NM_003278 // CLEC3B // C-type lectin domain family 3, member B // 3p22-p21.3 //	CLEC3B	NM_003278	1.66597	tumor up vs normal
NM_016150 // ASB2 // ankyrin repeat and SOCS box-containing 2 // 14q31-q32 // 51	ASB2	NM_016150	1.53873	tumor up vs normal
NM_001127889 // SPG21 // spastic paraplegia 21 (autosomal recessive, Mast syndro	SPG21	NM_001127889	-1.80533	tumor down vs normal
NM_205848 // SYT6 // synaptotagmin VI // 1p13.2 // 148281 /// ENST00000369547 //	SYT6	NM_205848	-1.50224	tumor down vs normal
NM_004359 // CDC34 // cell division cycle 34 homolog (S. cerevisiae) // 19p13.3	CDC34	NM_004359	1.59806	tumor up vs normal
AK097855 // FLJ40536 // FLJ40536 protein // 10q26.13 // 399819	FLJ40536	AK097855	1.51785	tumor up vs normal
NM_004711 // SYNGR1 // synaptogyrin 1 // 22q13.1 // 9145 /// NM_145731 // SYNGR1	SYNGR1	NM_004711	1.56213	tumor up vs normal
NM_001102396 // SIKE1 // suppressor of IKBKE 1 // 1p13.2 // 80143 /// NM_025073	SIKE1	NM_001102396	-1.57196	tumor down vs normal
NM_002310 // LIFR // leukemia inhibitory factor receptor alpha // 5p13-p12 // 39	LIFR	NM_002310	-2.01344	tumor down vs normal
NM_024832 // RIN3 // Ras and Rab interactor 3 // 14q32.12 // 79890 /// ENST00000	RIN3	NM_024832	1.54564	tumor up vs normal
NM_001135005 // DNAJB5 // DnaJ (Hsp40) homolog, subfamily B, member 5 // 9p13.3	DNAJB5	NM_001135005	1.72479	tumor up vs normal
NM_001144967 // NEDD4L // neural precursor cell expressed, developmentally down-	NEDD4L	NM_001144967	-1.80002	tumor down vs normal
NR_026572 // PDE2A // phosphodiesterase 2A, cGMP-stimulated // 11q13.4 // 5138 /	PDE2A	NR_026572	1.47433	tumor up vs normal
NM_000732 // CD3D // CD3d molecule, delta (CD3-TCR complex) // 11q23 // 915 ///	CD3D	NM_000732	-1.66466	tumor down vs normal
NM_009586 // SIM2 // single-minded homolog 2 (Drosophila) // 21q22.2|21q22.13 //	SIM2	NM_009586	-1.81987	tumor down vs normal
NM_003348 // UBE2N // ubiquitin-conjugating enzyme E2N (UBC13 homolog, yeast) //	UBE2N	NM_003348	-1.67451	tumor down vs normal
NM_024787 // RNF122 // ring finger protein 122 // 8p12 // 79845 /// ENST00000256	RNF122	NM_024787	1.57965	tumor up vs normal
NM_005159 // ACTC1 // actin, alpha, cardiac muscle 1 // 15q11-q14 // 70 /// ENST	ACTC1	NM_005159	2.36041	tumor up vs normal
NM_002579 // PALM // paralemmin // 19p13.3 // 5064 /// NM_001040134 // PALM // p	PALM	NM_002579	1.6122	tumor up vs normal
NM_002726 // PREP // prolyl endopeptidase // 6q22 // 5550 /// ENST00000369110 //	PREP	NM_002726	-1.52905	tumor down vs normal
NM_001098526 // AMICA1 // adhesion molecule, interacts with CXADR antigen 1 // 1	AMICA1	NM_001098526	-1.7348	tumor down vs normal
NM_001271 // CHD2 // chromodomain helicase DNA binding protein 2 // 15q26 // 110	CHD2	NM_001271	-1.58558	tumor down vs normal
NM_139320 // CHRFAM7A // CHRNA7 (cholinergic receptor, nicotinic, alpha 7, exons	CHRFAM7A	NM_139320	1.80247	tumor up vs normal
NM_001174129 // SLC11A2 // solute carrier family 11 (proton-coupled divalent met	SLC11A2	NM_001174129	-1.69758	tumor down vs normal
NM_022739 // SMURF2 // SMAD specific E3 ubiquitin protein ligase 2 // 17q22-q23	SMURF2	NM_022739	-1.76764	tumor down vs normal
NM_023926 // ZSCAN18 // zinc finger and SCAN domain containing 18 // 19q13.43 //	ZSCAN18	NM_023926	1.56995	tumor up vs normal
NM_014865 // NCAPD2 // non-SMC condensin I complex, subunit D2 // 12p13.3 // 991	NCAPD2	NM_014865	-1.5708	tumor down vs normal
NM_006646 // WASF3 // WAS protein family, member 3 // 13q12 // 10810 /// ENST000	WASF3	NM_006646	-1.58547	tumor down vs normal
NM_006478 // GAS2L1 // growth arrest-specific 2 like 1 // 22q12.2 // 10634 /// N	GAS2L1	NM_006478	1.50769	tumor up vs normal
NM_016472 // C14orf129 // chromosome 14 open reading frame 129 // 14q32.2 // 515	C14orf129	NM_016472	-1.73656	tumor down vs normal
NM_004566 // PFKFB3 // 6-phosphofructo-2-kinase/fructose-2,6-biphosphatase 3 //	PFKFB3	NM_004566	1.60171	tumor up vs normal
NM_018976 // SLC38A2 // solute carrier family 38, member 2 // 12q // 54407 /// E	SLC38A2	NM_018976	-1.81853	tumor down vs normal
NM_170743 // IL28RA // interleukin 28 receptor, alpha (interferon, lambda recept	IL28RA	NM_170743	1.55551	tumor up vs normal
NM_002927 // RGS13 // regulator of G-protein signaling 13 // 1q31.2 // 6003 ///	RGS13	NM_002927	1.66669	tumor up vs normal
NM_003214 // TEAD3 // TEA domain family member 3 // 6p21.2 // 7005 /// ENST00000	TEAD3	NM_003214	1.66023	tumor up vs normal
NM_000041 // APOE // apolipoprotein E // 19q13.2 // 348 /// ENST00000252486 // A	APOE	NM_000041	-1.68651	tumor down vs normal
NM_001136022 // NFATC4 // nuclear factor of activated T-cells, cytoplasmic, calc	NFATC4	NM_001136022	1.67587	tumor up vs normal
NR_033818 // IKBKB // inhibitor of kappa light polypeptide gene enhancer in B-ce	IKBKB	NR_033818	-1.54631	tumor down vs normal
NM_003282 // TNNI2 // troponin I type 2 (skeletal, fast) // 11p15.5 // 7136 ///	TNNI2	NM_003282	1.56149	tumor up vs normal
NM_005565 // LCP2 // lymphocyte cytosolic protein 2 (SH2 domain containing leuko	LCP2	NM_005565	-1.56086	tumor down vs normal
NM_001412 // EIF1AX // eukaryotic translation initiation factor 1A, X-linked //	EIF1AX	NM_001412	-2.22302	tumor down vs normal
NM_016059 // PPIL1 // peptidylprolyl isomerase (cyclophilin)-like 1 // 6p21.1 //	PPIL1	NM_016059	1.50266	tumor up vs normal
NM_014832 // TBC1D4 // TBC1 domain family, member 4 // 13q22.2 // 9882 /// ENST0	TBC1D4	NM_014832	-1.76666	tumor down vs normal
NM_178815 // ARL5B // ADP-ribosylation factor-like 5B // 10p12.31 // 221079 ///	ARL5B	NM_178815	-1.70276	tumor down vs normal
NM_001124 // ADM // adrenomedullin // 11p15.4 // 133 /// ENST00000278175 // ADM	ADM	NM_001124	1.54143	tumor up vs normal
NM_001856 // COL16A1 // collagen, type XVI, alpha 1 // 1p35-p34 // 1307 /// ENST	COL16A1	NM_001856	1.62334	tumor up vs normal
NM_000409 // GUCA1A // guanylate cyclase activator 1A (retina) // 6p21.1 // 2978	GUCA1A	NM_000409	-1.47206	tumor down vs normal
NM_130783 // TSPAN18 // tetraspanin 18 // 11p11.2 // 90139 /// ENST00000340160 /	TSPAN18	NM_130783	1.74115	tumor up vs normal
NM_001081550 // THOC2 // THO complex 2 // Xq25-q26.3 // 57187 /// ENST0000024583	THOC2	NM_001081550	-1.62187	tumor down vs normal
NM_015455 // CNOT6 // CCR4-NOT transcription complex, subunit 6 // 5q35.3 // 574	CNOT6	NM_015455	-1.60965	tumor down vs normal
NM_130444 // COL18A1 // collagen, type XVIII, alpha 1 // 21q22.3 // 80781 /// NM	COL18A1	NM_130444	1.62393	tumor up vs normal
NM_012134 // LMOD1 // leiomodin 1 (smooth muscle) // 1q32 // 25802 /// ENST00000	LMOD1	NM_012134	1.74128	tumor up vs normal
NM_138423 // CASC4 // cancer susceptibility candidate 4 // 15q15.3 // 113201 ///	CASC4	NM_138423	-1.5972	tumor down vs normal
NM_015982 // YBX2 // Y box binding protein 2 // 17p13.1 // 51087 /// ENST0000000	YBX2	NM_015982	1.66159	tumor up vs normal
AY358807 // LOC100129033 // QIQN5815 // 6p25.1 // 100129033	LOC100129033	AY358807	1.58126	tumor up vs normal
NM_152989 // SOX5 // SRY (sex determining region Y)-box 5 // 12p12.1 // 6660 ///	SOX5	NM_152989	1.58585	tumor up vs normal
NM_000930 // PLAT // plasminogen activator, tissue // 8p12 // 5327 /// NM_033011	PLAT	NM_000930	1.78881	tumor up vs normal
NM_006517 // SLC16A2 // solute carrier family 16, member 2 (monocarboxylic acid	SLC16A2	NM_006517	1.57221	tumor up vs normal
NM_173633 // TMEM145 // transmembrane protein 145 // 19q13.2 // 284339 /// ENST0	TMEM145	NM_173633	2.12881	tumor up vs normal
NR_023318 // ADPGK // ADP-dependent glucokinase // 15q24.1 // 83440 /// NM_03128	ADPGK	NR_023318	-1.78702	tumor down vs normal
NM_018443 // ZNF302 // zinc finger protein 302 // 19q13.11 // 55900 /// NM_00101	ZNF302	NM_018443	-1.62767	tumor down vs normal
NM_198098 // AQP1 // aquaporin 1 (Colton blood group) // 7p14 // 358 /// NM_0011	AQP1	NM_198098	1.69553	tumor up vs normal
NM_000023 // SGCA // sarcoglycan, alpha (50kDa dystrophin-associated glycoprotei	SGCA	NM_000023	1.52176	tumor up vs normal
NM_002803 // PSMC2 // proteasome (prosome, macropain) 26S subunit, ATPase, 2 //	PSMC2	NM_002803	1.73681	tumor up vs normal
NM_015308 // FNBP4 // formin binding protein 4 // 11p11.2 // 23360 /// ENST00000	FNBP4	NM_015308	-1.62806	tumor down vs normal
NR_026669 // SNAP91 // synaptosomal-associated protein, 91kDa homolog (mouse) //	SNAP91	NR_026669	-1.77089	tumor down vs normal
NM_152788 // ANKS1B // ankyrin repeat and sterile alpha motif domain containing	ANKS1B	NM_152788	1.52239	tumor up vs normal
NM_177457 // LYNX1 // Ly6/neurotoxin 1 // 8q24.3 // 66004 /// NM_177477 // LYNX1	LYNX1	NM_177457	1.54402	tumor up vs normal
NM_015074 // KIF1B // kinesin family member 1B // 1p36.2 // 23095 /// NM_183416	KIF1B	NM_015074	-1.52043	tumor down vs normal
NM_003102 // SOD3 // superoxide dismutase 3, extracellular // 4p15.3-p15.1 // 66	SOD3	NM_003102	1.59333	tumor up vs normal
NM_017438 // SETD4 // SET domain containing 4 // 21q22.13 // 54093 /// NM_001007	SETD4	NM_017438	1.50872	tumor up vs normal
NM_173602 // DIP2B // DIP2 disco-interacting protein 2 homolog B (Drosophila) //	DIP2B	NM_173602	-1.58733	tumor down vs normal
NM_005668 // ST8SIA4 // ST8 alpha-N-acetyl-neuraminide alpha-2,8-sialyltransfera	ST8SIA4	NM_005668	-1.54762	tumor down vs normal
NM_152794 // HIF3A // hypoxia inducible factor 3, alpha subunit // 19q13.32 // 6	HIF3A	NM_152794	1.5283	tumor up vs normal
NM_145867 // LTC4S // leukotriene C4 synthase // 5q35 // 4056 /// ENST0000029259	LTC4S	NM_145867	-1.47083	tumor down vs normal
AK091672 // LOC286161 // hypothetical protein LOC286161 // 8p23.3 // 286161	LOC286161	AK091672	-2.04662	tumor down vs normal
NM_153266 // TMEM151A // transmembrane protein 151A // 11q13.2 // 256472 /// ENS	TMEM151A	NM_153266	1.46146	tumor up vs normal
NM_000962 // PTGS1 // prostaglandin-endoperoxide synthase 1 (prostaglandin G/H s	PTGS1	NM_000962	1.59195	tumor up vs normal
NM_002508 // NID1 // nidogen 1 // 1q43 // 4811 /// ENST00000264187 // NID1 // ni	NID1	NM_002508	1.56006	tumor up vs normal
NM_015939 // TRMT6 // tRNA methyltransferase 6 homolog (S. cerevisiae) // 20p12.	TRMT6	NM_015939	-1.5412	tumor down vs normal
NM_006943 // SOX12 // SRY (sex determining region Y)-box 12 // 20p13 // 6666 ///	SOX12	NM_006943	1.52645	tumor up vs normal
NM_207368 // FAM195B // family with sequence similarity 195, member B // 17q25.3	FAM195B	NM_207368	1.59264	tumor up vs normal
NM_001127663 // GSN // gelsolin // 9q33 // 2934 /// NM_000177 // GSN // gelsolin	GSN	NM_001127663	1.59279	tumor up vs normal
NM_019044 // CCDC93 // coiled-coil domain containing 93 // 2q14.1 // 54520 /// E	CCDC93	NM_019044	1.53325	tumor up vs normal
NM_001105562 // UBE4B // ubiquitination factor E4B (UFD2 homolog, yeast) // 1p36	UBE4B	NM_001105562	-1.55862	tumor down vs normal
NM_005337 // NCKAP1L // NCK-associated protein 1-like // 12q13.1 // 3071 /// NM_	NCKAP1L	NM_005337	-1.57203	tumor down vs normal
NM_203303 // ZCCHC13 // zinc finger, CCHC domain containing 13 // Xq13.2 // 3898	ZCCHC13	NM_203303	-1.48239	tumor down vs normal
NM_003142 // SSB // Sjogren syndrome antigen B (autoantigen La) // 2q31.1 // 674	SSB	NM_003142	-2.14346	tumor down vs normal
NM_032627 // SSBP4 // single stranded DNA binding protein 4 // 19p13.1 // 170463	SSBP4	NM_032627	1.69739	tumor up vs normal
NM_175634 // RUNX1T1 // runt-related transcription factor 1; translocated to, 1	RUNX1T1	NM_175634	1.55898	tumor up vs normal
NM_018072 // HEATR1 // HEAT repeat containing 1 // 1q43 // 55127 /// ENST0000036	HEATR1	NM_018072	-1.55938	tumor down vs normal
NM_001159 // AOX1 // aldehyde oxidase 1 // 2q33 // 316 /// ENST00000374700 // AO	AOX1	NM_001159	1.6329	tumor up vs normal
NM_018327 // SPTLC3 // serine palmitoyltransferase, long chain base subunit 3 //	SPTLC3	NM_018327	1.53903	tumor up vs normal
NM_001145418 // TTC28 // tetratricopeptide repeat domain 28 // 22q12.1 // 23331	TTC28	NM_001145418	1.5377	tumor up vs normal
NM_181342 // FKBP7 // FK506 binding protein 7 // 2q31.2 // 51661 /// NM_00113521	FKBP7	NM_181342	1.53765	tumor up vs normal
NM_002847 // PTPRN2 // protein tyrosine phosphatase, receptor type, N polypeptid	PTPRN2	NM_002847	-1.79001	tumor down vs normal
NM_001814 // CTSC // cathepsin C // 11q14.2 // 1075 /// NM_148170 // CTSC // cat	CTSC	NM_001814	-1.65557	tumor down vs normal
NM_001099412 // MYST3 // MYST histone acetyltransferase (monocytic leukemia) 3 /	MYST3	NM_001099412	-1.62148	tumor down vs normal
NM_013257 // SGK3 // serum/glucocorticoid regulated kinase family, member 3 // 8	SGK3	NM_013257	-1.65631	tumor down vs normal
NM_002874 // RAD23B // RAD23 homolog B (S. cerevisiae) // 9q31.2 // 5887 /// ENS	RAD23B	NM_002874	-1.6178	tumor down vs normal
NM_004105 // EFEMP1 // EGF-containing fibulin-like extracellular matrix protein	EFEMP1	NM_004105	1.70016	tumor up vs normal
NM_173601 // GXYLT1 // glucoside xylosyltransferase 1 // 12q12 // 283464 /// NM_	GXYLT1	NM_173601	-1.56906	tumor down vs normal
NM_000773 // CYP2E1 // cytochrome P450, family 2, subfamily E, polypeptide 1 //	CYP2E1	NM_000773	1.58232	tumor up vs normal
NM_001127211 // KIAA1598 // KIAA1598 // 10q25.3 // 57698 /// NM_018330 // KIAA15	KIAA1598	NM_001127211	-1.59268	tumor down vs normal
NM_003947 // KALRN // kalirin, RhoGEF kinase // 3q21.2 // 8997 /// NM_001024660	KALRN	NM_003947	1.57959	tumor up vs normal
---		---	1.60549	tumor up vs normal
NM_001042544 // LTBP4 // latent transforming growth factor beta binding protein	LTBP4	NM_001042544	1.62037	tumor up vs normal
NM_001164595 // PDZRN4 // PDZ domain containing ring finger 4 // 12q12 // 29951	PDZRN4	NM_001164595	1.58136	tumor up vs normal
NM_006363 // SEC23B // Sec23 homolog B (S. cerevisiae) // 20p11.23 // 10483 ///	SEC23B	NM_006363	-1.68181	tumor down vs normal
NM_052841 // TSSK3 // testis-specific serine kinase 3 // 1p35-p34 // 81629 /// E	TSSK3	NM_052841	1.52603	tumor up vs normal
NM_006530 // YEATS4 // YEATS domain containing 4 // 12q13-q15 // 8089 /// ENST00	YEATS4	NM_006530	-1.70058	tumor down vs normal
NM_001009993 // FAM168B // family with sequence similarity 168, member B // 2q21	FAM168B	NM_001009993	-1.56685	tumor down vs normal
ENST00000400419 // MGC5590 // hypothetical protein MGC5590 // 13q14.11 // 79024	MGC5590	ENST00000400419	1.81562	tumor up vs normal
NM_003115 // UAP1 // UDP-N-acteylglucosamine pyrophosphorylase 1 // 1q23.3 // 66	UAP1	NM_003115	-1.67637	tumor down vs normal
NM_004053 // BYSL // bystin-like // 6p21.1 // 705 /// ENST00000230340 // BYSL //	BYSL	NM_004053	-1.56537	tumor down vs normal
NM_001004471 // OR10Q1 // olfactory receptor, family 10, subfamily Q, member 1 /	OR10Q1	NM_001004471	1.56253	tumor up vs normal
NM_053025 // MYLK // myosin light chain kinase // 3q21 // 4638 /// NM_053026 //	MYLK	NM_053025	1.5946	tumor up vs normal
NM_017824 // MARCH5 // membrane-associated ring finger (C3HC4) 5 // 10q23.32-q23	2012-03-05	NM_017824	-1.65872	tumor down vs normal
NM_003609 // HIRIP3 // HIRA interacting protein 3 // 16p11.2 // 8479 /// ENST000	HIRIP3	NM_003609	1.54634	tumor up vs normal
NM_001136216 // TMEM51 // transmembrane protein 51 // 1p36.21 // 55092 /// NM_00	TMEM51	NM_001136216	1.56157	tumor up vs normal
NM_016388 // TRAT1 // T cell receptor associated transmembrane adaptor 1 // 3q13	TRAT1	NM_016388	-1.59123	tumor down vs normal
NM_020994 // CTAG2 // cancer/testis antigen 2 // Xq28 // 30848 /// NM_172377 //	CTAG2	NM_020994	1.51823	tumor up vs normal
NM_006153 // NCK1 // NCK adaptor protein 1 // 3q21 // 4690 /// NM_001190796 // N	NCK1	NM_006153	-1.64006	tumor down vs normal
NM_005575 // LNPEP // leucyl/cystinyl aminopeptidase // 5q15 // 4012 /// ENST000	LNPEP	NM_005575	1.59023	tumor up vs normal
NM_152486 // SAMD11 // sterile alpha motif domain containing 11 // 1p36.33 // 14	SAMD11	NM_152486	1.60839	tumor up vs normal
NM_134269 // SMTN // smoothelin // 22q12.2 // 6525 /// NM_006932 // SMTN // smoo	SMTN	NM_134269	1.67034	tumor up vs normal
NM_199346 // PFN4 // profilin family, member 4 // 2p23.3 // 375189 /// ENST00000	PFN4	NM_199346	1.60213	tumor up vs normal
NM_004285 // H6PD // hexose-6-phosphate dehydrogenase (glucose 1-dehydrogenase)	H6PD	NM_004285	1.55114	tumor up vs normal
NM_022453 // RNF25 // ring finger protein 25 // 2q35 // 64320 /// ENST0000029570	RNF25	NM_022453	1.54091	tumor up vs normal
NM_001097634 // GCNT1 // glucosaminyl (N-acetyl) transferase 1, core 2 // 9q13 /	GCNT1	NM_001097634	-1.98415	tumor down vs normal
NM_013304 // ZDHHC1 // zinc finger, DHHC-type containing 1 // 16q22.1 // 29800 /	ZDHHC1	NM_013304	1.48172	tumor up vs normal
NM_147161 // ACOT11 // acyl-CoA thioesterase 11 // 1p32.3 // 26027 /// NM_015547	ACOT11	NM_147161	1.54549	tumor up vs normal
NM_024007 // EBF1 // early B-cell factor 1 // 5q34 // 1879 /// ENST00000313708 /	EBF1	NM_024007	1.64368	tumor up vs normal
NM_015367 // BCL2L13 // BCL2-like 13 (apoptosis facilitator) // 22q11.1 // 23786	BCL2L13	NM_015367	-1.55513	tumor down vs normal
NM_013385 // CYTH4 // cytohesin 4 // 22q12.3-q13.1 // 27128 /// ENST00000248901	CYTH4	NM_013385	-1.53409	tumor down vs normal
NM_001765 // CD1C // CD1c molecule // 1q22-q23 // 911 /// ENST00000368170 // CD1	CD1C	NM_001765	-1.63468	tumor down vs normal
NM_006032 // CPNE6 // copine VI (neuronal) // 14q11.2 // 9362 /// ENST0000039701	CPNE6	NM_006032	1.57415	tumor up vs normal
NM_001627 // ALCAM // activated leukocyte cell adhesion molecule // 3q13.1 // 21	ALCAM	NM_001627	-1.69555	tumor down vs normal
NM_019032 // ADAMTSL4 // ADAMTS-like 4 // 1q21.3 // 54507 /// NM_025008 // ADAMT	ADAMTSL4	NM_019032	1.49223	tumor up vs normal
NM_152336 // AGBL1 // ATP/GTP binding protein-like 1 // 15q25.3 // 123624 /// EN	AGBL1	NM_152336	1.74199	tumor up vs normal
NM_001159531 // BEGAIN // brain-enriched guanylate kinase-associated homolog (ra	BEGAIN	NM_001159531	1.46052	tumor up vs normal
NM_018086 // FIGN // fidgetin // 2q24.3 // 55137 /// ENST00000333129 // FIGN //	FIGN	NM_018086	1.6948	tumor up vs normal
NM_138409 // MRAP2 // melanocortin 2 receptor accessory protein 2 // 6q14.2 // 1	MRAP2	NM_138409	1.59062	tumor up vs normal
NM_000851 // GSTM5 // glutathione S-transferase mu 5 // 1p13.3 // 2949 /// ENST0	GSTM5	NM_000851	1.79494	tumor up vs normal
NM_183238 // ZNF605 // zinc finger protein 605 // 12q24.33 // 100289635 /// NM_0	ZNF605	NM_183238	-1.55821	tumor down vs normal
NM_000031 // ALAD // aminolevulinate dehydratase // 9q33.1 // 210 /// ENST000004	ALAD	NM_000031	1.6386	tumor up vs normal
NM_033240 // PML // promyelocytic leukemia // 15q22 // 5371 /// NM_033244 // PML	PML	NM_033240	1.5931	tumor up vs normal
NM_006617 // NES // nestin // 1q23.1 // 10763 /// ENST00000368223 // NES // nest	NES	NM_006617	1.62959	tumor up vs normal
NR_026919 // LOC150197 // hypothetical LOC150197 // 22q11.21 // 150197 /// CR456	LOC150197	NR_026919	1.50606	tumor up vs normal
NM_000403 // GALE // UDP-galactose-4-epimerase // 1p36-p35 // 2582 /// NM_001008	GALE	NM_000403	1.53093	tumor up vs normal
NM_015077 // SARM1 // sterile alpha and TIR motif containing 1 // 17q11 // 23098	SARM1	NM_015077	1.50038	tumor up vs normal
NR_027071 // C8orf56 // chromosome 8 open reading frame 56 // 8q22.3 // 157556 /	C8orf56	NR_027071	-1.46105	tumor down vs normal
NM_020340 // KIAA1244 // KIAA1244 // 6q23.3 // 57221 /// ENST00000251691 // KIAA	KIAA1244	NM_020340	-1.71578	tumor down vs normal
NM_004239 // TRIP11 // thyroid hormone receptor interactor 11 // 14q31-q32 // 93	TRIP11	NM_004239	-1.60167	tumor down vs normal
NM_182828 // GDF7 // growth differentiation factor 7 // 2p24.1 // 151449 /// ENS	GDF7	NM_182828	1.57423	tumor up vs normal
NM_001170423 // PRSS35 // protease, serine, 35 // 6q14.2 // 167681 /// NM_153362	PRSS35	NM_001170423	1.57265	tumor up vs normal
NM_003734 // AOC3 // amine oxidase, copper containing 3 (vascular adhesion prote	AOC3	NM_003734	1.6946	tumor up vs normal
NM_022918 // TMEM135 // transmembrane protein 135 // 11q14.2 // 65084 /// NR_033	TMEM135	NM_022918	-1.65533	tumor down vs normal
NM_001031721 // ZNF613 // zinc finger protein 613 // 19q13.41 // 79898 /// NM_02	ZNF613	NM_001031721	-1.88462	tumor down vs normal
NM_004064 // CDKN1B // cyclin-dependent kinase inhibitor 1B (p27, Kip1) // 12p13	CDKN1B	NM_004064	-1.65739	tumor down vs normal
NM_201266 // NRP2 // neuropilin 2 // 2q33.3 // 8828 /// NM_003872 // NRP2 // neu	NRP2	NM_201266	1.59314	tumor up vs normal
NM_015901 // NUDT13 // nudix (nucleoside diphosphate linked moiety X)-type motif	NUDT13	NM_015901	-1.61137	tumor down vs normal
NM_001278 // CHUK // conserved helix-loop-helix ubiquitous kinase // 10q24-q25 /	CHUK	NM_001278	-1.60713	tumor down vs normal
NM_014829 // DDX46 // DEAD (Asp-Glu-Ala-Asp) box polypeptide 46 // 5q31.1 // 987	DDX46	NM_014829	-1.54916	tumor down vs normal
NM_002922 // RGS1 // regulator of G-protein signaling 1 // 1q31 // 5996 /// ENST	RGS1	NM_002922	-1.7334	tumor down vs normal
NM_181708 // BCDIN3D // BCDIN3 domain containing // 12q13.12 // 144233 /// ENST0	BCDIN3D	NM_181708	-1.56325	tumor down vs normal
NM_052846 // EMILIN3 // elastin microfibril interfacer 3 // 20q12 // 90187 /// N	EMILIN3	NM_052846	1.51955	tumor up vs normal
NM_002718 // PPP2R3A // protein phosphatase 2, regulatory subunit B'', alpha //	PPP2R3A	NM_002718	1.55616	tumor up vs normal
NM_018326 // GIMAP4 // GTPase, IMAP family member 4 // 7q36.1 // 55303 /// ENST0	GIMAP4	NM_018326	-1.69518	tumor down vs normal
NM_020234 // DTWD1 // DTW domain containing 1 // 15q21.2 // 56986 /// NM_0011449	DTWD1	NM_020234	-1.50506	tumor down vs normal
NM_198236 // ARHGEF11 // Rho guanine nucleotide exchange factor (GEF) 11 // 1q21	ARHGEF11	NM_198236	1.50184	tumor up vs normal
NM_203453 // PPAPDC2 // phosphatidic acid phosphatase type 2 domain containing 2	PPAPDC2	NM_203453	-1.75297	tumor down vs normal
NM_005856 // RAMP3 // receptor (G protein-coupled) activity modifying protein 3	RAMP3	NM_005856	1.57261	tumor up vs normal
NM_198066 // GNPNAT1 // glucosamine-phosphate N-acetyltransferase 1 // 14q22.1 /	GNPNAT1	NM_198066	-1.84317	tumor down vs normal
NM_024635 // NAA35 // N(alpha)-acetyltransferase 35, NatC auxiliary subunit // 9	NAA35	NM_024635	-1.76623	tumor down vs normal
NM_001030047 // KLK3 // kallikrein-related peptidase 3 // 19q13.41 // 354 /// NM	KLK3	NM_001030047	-1.73818	tumor down vs normal
NM_001039569 // AP1S3 // adaptor-related protein complex 1, sigma 3 subunit // 2	AP1S3	NM_001039569	-1.56757	tumor down vs normal
NM_005606 // LGMN // legumain // 14q32.1 // 5641 /// NM_001008530 // LGMN // leg	LGMN	NM_005606	-1.77769	tumor down vs normal
NM_052917 // GALNT13 // UDP-N-acetyl-alpha-D-galactosamine:polypeptide N-acetylg	GALNT13	NM_052917	1.60021	tumor up vs normal
NM_018945 // PDE7B // phosphodiesterase 7B // 6q23-q24 // 27115 /// ENST00000308	PDE7B	NM_018945	1.58231	tumor up vs normal
NM_006537 // USP3 // ubiquitin specific peptidase 3 // 15q22.3 // 9960 /// ENST0	USP3	NM_006537	-1.66033	tumor down vs normal
NM_007162 // TFEB // transcription factor EB // 6p21 // 7942 /// NM_001167827 //	TFEB	NM_007162	1.5321	tumor up vs normal
NM_002162 // ICAM3 // intercellular adhesion molecule 3 // 19p13.3-p13.2 // 3385	ICAM3	NM_002162	-1.62019	tumor down vs normal
NM_001034852 // SMOC1 // SPARC related modular calcium binding 1 // 14q24.2 // 6	SMOC1	NM_001034852	1.72292	tumor up vs normal
NM_152411 // ZNF786 // zinc finger protein 786 // 7q36.1 // 136051 /// ENST00000	ZNF786	NM_152411	1.55116	tumor up vs normal
NM_007046 // EMILIN1 // elastin microfibril interfacer 1 // 2p23.3-p23.2 // 1111	EMILIN1	NM_007046	1.65718	tumor up vs normal
NM_001037954 // DIXDC1 // DIX domain containing 1 // 11q23.1 // 85458 /// NM_033	DIXDC1	NM_001037954	1.67819	tumor up vs normal
NM_005864 // EFS // embryonal Fyn-associated substrate // 14q11.2-q12 // 10278 /	EFS	NM_005864	1.56346	tumor up vs normal
NM_002526 // NT5E // 5'-nucleotidase, ecto (CD73) // 6q14-q21 // 4907 /// ENST00	NT5E	NM_002526	1.73004	tumor up vs normal
NM_004845 // PCYT1B // phosphate cytidylyltransferase 1, choline, beta // Xp22.1	PCYT1B	NM_004845	1.5443	tumor up vs normal
NM_021202 // TP53INP2 // tumor protein p53 inducible nuclear protein 2 // 20q11.	TP53INP2	NM_021202	1.54683	tumor up vs normal
NM_002081 // GPC1 // glypican 1 // 2q35-q37 // 2817 /// NR_029702 // MIR149 // m	GPC1	NM_002081	1.51862	tumor up vs normal
NM_004469 // FIGF // c-fos induced growth factor (vascular endothelial growth fa	FIGF	NM_004469	1.55959	tumor up vs normal
NM_032412 // C5orf32 // chromosome 5 open reading frame 32 // 5q31.3 // 84418 //	C5orf32	NM_032412	1.73426	tumor up vs normal
NM_005089 // ZRSR2 // zinc finger (CCCH type), RNA-binding motif and serine/argi	ZRSR2	NM_005089	1.85205	tumor up vs normal
NM_003383 // VLDLR // very low density lipoprotein receptor // 9p24 // 7436 ///	VLDLR	NM_003383	-1.70376	tumor down vs normal
NM_001193523 // FAM65A // family with sequence similarity 65, member A // 16q22.	FAM65A	NM_001193523	1.56209	tumor up vs normal
NM_003320 // TUB // tubby homolog (mouse) // 11p15.5 // 7275 /// NM_177972 // TU	TUB	NM_003320	1.51078	tumor up vs normal
NM_002910 // RENBP // renin binding protein // Xq28 // 5973 /// ENST00000393700	RENBP	NM_002910	1.53625	tumor up vs normal
NM_001128159 // VPS53 // vacuolar protein sorting 53 homolog (S. cerevisiae) //	VPS53	NM_001128159	-1.556	tumor down vs normal
NM_002205 // ITGA5 // integrin, alpha 5 (fibronectin receptor, alpha polypeptide	ITGA5	NM_002205	1.67243	tumor up vs normal
NM_013376 // SERTAD1 // SERTA domain containing 1 // 19q13.1-q13.2 // 29950 ///	SERTAD1	NM_013376	1.67987	tumor up vs normal
NM_001098615 // PUS7L // pseudouridylate synthase 7 homolog (S. cerevisiae)-like	PUS7L	NM_001098615	-1.65577	tumor down vs normal
NM_014141 // CNTNAP2 // contactin associated protein-like 2 // 7q35 // 26047 ///	CNTNAP2	NM_014141	-1.75267	tumor down vs normal
NM_017635 // SUV420H1 // suppressor of variegation 4-20 homolog 1 (Drosophila) /	SUV420H1	NM_017635	-1.65633	tumor down vs normal
NM_033223 // GABRG3 // gamma-aminobutyric acid (GABA) A receptor, gamma 3 // 15q	GABRG3	NM_033223	-1.90506	tumor down vs normal
NM_001077639 // FAM55D // family with sequence similarity 55, member D // 11q23.	FAM55D	NM_001077639	1.7998	tumor up vs normal
NM_032779 // CCDC142 // coiled-coil domain containing 142 // 2p13.1 // 84865 ///	CCDC142	NM_032779	1.52148	tumor up vs normal
AK292513 // C14orf37 // chromosome 14 open reading frame 37 // 14q23.1 // 145407	C14orf37	AK292513	1.49031	tumor up vs normal
NM_003121 // SPIB // Spi-B transcription factor (Spi-1/PU.1 related) // 19q13.3-	SPIB	NM_003121	-1.501	tumor down vs normal
NM_018672 // ABCA5 // ATP-binding cassette, sub-family A (ABC1), member 5 // 17q	ABCA5	NM_018672	-1.69098	tumor down vs normal
NM_025195 // TRIB1 // tribbles homolog 1 (Drosophila) // 8q24.13 // 10221 /// EN	TRIB1	NM_025195	-1.80344	tumor down vs normal
NM_020750 // XPO5 // exportin 5 // 6p21.1 // 57510 /// ENST00000265351 // XPO5 /	XPO5	NM_020750	-1.50599	tumor down vs normal
NM_003565 // ULK1 // unc-51-like kinase 1 (C. elegans) // 12q24.3 // 8408 /// EN	ULK1	NM_003565	1.56722	tumor up vs normal
NM_019111 // HLA-DRA // major histocompatibility complex, class II, DR alpha //	HLA-DRA	NM_019111	-1.76642	tumor down vs normal
NM_014654 // SDC3 // syndecan 3 // 1pter-p22.3 // 9672 /// ENST00000339394 // SD	SDC3	NM_014654	1.64322	tumor up vs normal
NM_006795 // EHD1 // EH-domain containing 1 // 11q13 // 10938 /// ENST0000032063	EHD1	NM_006795	1.51003	tumor up vs normal
NM_014435 // NAAA // N-acylethanolamine acid amidase // 4q21.1 // 27163 /// NM_0	NAAA	NM_014435	-1.689	tumor down vs normal
NM_024741 // ZNF408 // zinc finger protein 408 // 11p11.2 // 79797 /// NM_001184	ZNF408	NM_024741	1.51113	tumor up vs normal
---		---	1.70034	tumor up vs normal
NM_001160260 // CNR1 // cannabinoid receptor 1 (brain) // 6q14-q15 // 1268 /// N	CNR1	NM_001160260	1.54125	tumor up vs normal
NM_001123329 // ZBTB1 // zinc finger and BTB domain containing 1 // 14q23.3 // 2	ZBTB1	NM_001123329	-1.64927	tumor down vs normal
NM_002838 // PTPRC // protein tyrosine phosphatase, receptor type, C // 1q31-q32	PTPRC	NM_002838	-1.66342	tumor down vs normal
NM_006511 // RSC1A1 // regulatory solute carrier protein, family 1, member 1 //	RSC1A1	NM_006511	-1.58659	tumor down vs normal
NM_001082486 // ACD // adrenocortical dysplasia homolog (mouse) // 16q22.1 // 65	ACD	NM_001082486	1.51798	tumor up vs normal
NM_005560 // LAMA5 // laminin, alpha 5 // 20q13.2-q13.3 // 3911 /// ENST00000252	LAMA5	NM_005560	1.52907	tumor up vs normal
NM_178433 // LCE3B // late cornified envelope 3B // 1q21.3 // 353143 /// ENST000	LCE3B	NM_178433	-1.71482	tumor down vs normal
NM_147162 // IL11RA // interleukin 11 receptor, alpha // 9p13 // 3590 /// NM_004	IL11RA	NM_147162	1.58371	tumor up vs normal
NM_001142520 // FAM111A // family with sequence similarity 111, member A // 11q1	FAM111A	NM_001142520	-1.67187	tumor down vs normal
NM_004255 // COX5A // cytochrome c oxidase subunit Va // 15q24.1 // 9377 /// ENS	COX5A	NM_004255	-1.76169	tumor down vs normal
NM_017847 // C1orf27 // chromosome 1 open reading frame 27 // 1q25 // 54953 ///	C1orf27	NM_017847	-1.61679	tumor down vs normal
NM_017755 // NSUN2 // NOP2/Sun domain family, member 2 // 5p15.31 // 54888 /// N	NSUN2	NM_017755	-1.52867	tumor down vs normal
NM_001852 // COL9A2 // collagen, type IX, alpha 2 // 1p33-p32 // 1298 /// ENST00	COL9A2	NM_001852	-1.54906	tumor down vs normal
NM_153267 // MAMDC2 // MAM domain containing 2 // 9q21.12 // 256691 /// NM_00098	MAMDC2	NM_153267	1.62425	tumor up vs normal
NM_017633 // FAM46A // family with sequence similarity 46, member A // 6q14 // 5	FAM46A	NM_017633	1.57259	tumor up vs normal
NM_016067 // MRPS18C // mitochondrial ribosomal protein S18C // 4q21.23 // 51023	MRPS18C	NM_016067	1.63962	tumor up vs normal
NM_005474 // HDAC5 // histone deacetylase 5 // 17q21 // 10014 /// NM_001015053 /	HDAC5	NM_005474	1.55824	tumor up vs normal
NM_001039469 // MARK2 // MAP/microtubule affinity-regulating kinase 2 // 11q13 /	MARK2	NM_001039469	-1.58575	tumor down vs normal
NM_020336 // RALGAPB // Ral GTPase activating protein, beta subunit (non-catalyt	RALGAPB	NM_020336	-1.68133	tumor down vs normal
NM_017700 // ARHGEF38 // Rho guanine nucleotide exchange factor (GEF) 38 // 4q24	ARHGEF38	NM_017700	-1.84398	tumor down vs normal
NM_005402 // RALA // v-ral simian leukemia viral oncogene homolog A (ras related	RALA	NM_005402	-1.57632	tumor down vs normal
NM_020649 // CBX8 // chromobox homolog 8 // 17q25.3 // 57332 /// ENST00000269385	CBX8	NM_020649	-1.49992	tumor down vs normal
NM_003480 // MFAP5 // microfibrillar associated protein 5 // 12p13.1-p12.3 // 80	MFAP5	NM_003480	2.14	tumor up vs normal
NM_021117 // CRY2 // cryptochrome 2 (photolyase-like) // 11p11.2 // 1408 /// NM_	CRY2	NM_021117	1.57513	tumor up vs normal
NM_015886 // PI15 // peptidase inhibitor 15 // 8q21.11 // 51050 /// ENST00000260	PI15	NM_015886	-2.08975	tumor down vs normal
NM_021814 // ELOVL5 // ELOVL family member 5, elongation of long chain fatty aci	ELOVL5	NM_021814	-1.70454	tumor down vs normal
NM_005325 // HIST1H1A // histone cluster 1, H1a // 6p21.3 // 3024 /// ENST000002	HIST1H1A	NM_005325	1.71325	tumor up vs normal
NM_032947 // C5orf62 // chromosome 5 open reading frame 62 // 5q33.1 // 85027 //	C5orf62	NM_032947	1.50357	tumor up vs normal
NM_015332 // NUDCD3 // NudC domain containing 3 // 7p13-p12 // 23386 /// ENST000	NUDCD3	NM_015332	1.52338	tumor up vs normal
NM_022164 // TINAGL1 // tubulointerstitial nephritis antigen-like 1 // 1p35.2 //	TINAGL1	NM_022164	1.61053	tumor up vs normal
NM_203462 // MRFAP1L1 // Morf4 family associated protein 1-like 1 // 4p16.1 // 1	MRFAP1L1	NM_203462	-1.61872	tumor down vs normal
NM_004522 // KIF5C // kinesin family member 5C // 2q23.1 // 3800 /// ENST0000043	KIF5C	NM_004522	-1.69344	tumor down vs normal
NM_016232 // IL1RL1 // interleukin 1 receptor-like 1 // 2q12 // 9173 /// NM_0038	IL1RL1	NM_016232	1.57574	tumor up vs normal
NM_001455 // FOXO3 // forkhead box O3 // 6q21 // 2309 /// NM_201559 // FOXO3 //	FOXO3	NM_001455	1.52653	tumor up vs normal
NM_004673 // ANGPTL1 // angiopoietin-like 1 // 1q25.2 // 9068 /// ENST0000023481	ANGPTL1	NM_004673	1.6354	tumor up vs normal
NM_019080 // NDFIP2 // Nedd4 family interacting protein 2 // 13q31.1 // 54602 //	NDFIP2	NM_019080	-1.65367	tumor down vs normal
NM_006226 // PLCL1 // phospholipase C-like 1 // 2q33 // 5334 /// ENST00000428675	PLCL1	NM_006226	1.66718	tumor up vs normal
NM_000693 // ALDH1A3 // aldehyde dehydrogenase 1 family, member A3 // 15q26.3 //	ALDH1A3	NM_000693	-1.67611	tumor down vs normal
NM_182960 // PRELID2 // PRELI domain containing 2 // 5q32 // 153768 /// NM_13849	PRELID2	NM_182960	1.64254	tumor up vs normal
NM_181619 // KRTAP21-1 // keratin associated protein 21-1 // 21q22.1 // 337977 /	KRTAP21-1	NM_181619	-1.5843	tumor down vs normal
NM_001500 // GMDS // GDP-mannose 4,6-dehydratase // 6p25 // 2762 /// ENST0000038	GMDS	NM_001500	-1.80053	tumor down vs normal
NM_152698 // FAM123C // family with sequence similarity 123C // 2q21.1 // 205147	FAM123C	NM_152698	-1.53888	tumor down vs normal
NM_001042 // SLC2A4 // solute carrier family 2 (facilitated glucose transporter)	SLC2A4	NM_001042	1.64781	tumor up vs normal
NM_002298 // LCP1 // lymphocyte cytosolic protein 1 (L-plastin) // 13q14.3 // 39	LCP1	NM_002298	-1.7145	tumor down vs normal
NM_013349 // NENF // neuron derived neurotrophic factor // 1q32.3 // 29937 /// N	NENF	NM_013349	1.60441	tumor up vs normal
NM_003993 // CLK2 // CDC-like kinase 2 // 1q21 // 1196 /// NR_002711 // CLK2P //	CLK2	NM_003993	-1.52412	tumor down vs normal
NR_033410 // MKRN9P // makorin ring finger protein 9, pseudogene // 12q21.32 //	MKRN9P	NR_033410	1.55786	tumor up vs normal
NM_013381 // TRHDE // thyrotropin-releasing hormone degrading enzyme // 12q15-q2	TRHDE	NM_013381	1.58206	tumor up vs normal
NM_001114735 // BCL2A1 // BCL2-related protein A1 // 15q24.3 // 597 /// NM_00404	BCL2A1	NM_001114735	-1.51	tumor down vs normal
NM_001039844 // ACBD7 // acyl-CoA binding domain containing 7 // 10p13 // 414149	ACBD7	NM_001039844	1.67882	tumor up vs normal
NM_014392 // D4S234E // DNA segment on chromosome 4 (unique) 234 expressed seque	D4S234E	NM_014392	1.69833	tumor up vs normal
NR_024071 // PLCD1 // phospholipase C, delta 1 // 3p22-p21.3 // 5333 /// NM_0011	PLCD1	NR_024071	1.48984	tumor up vs normal
NM_145065 // PELI3 // pellino homolog 3 (Drosophila) // 11q13.2 // 246330 /// NM	PELI3	NM_145065	1.48908	tumor up vs normal
NM_005631 // SMO // smoothened homolog (Drosophila) // 7q32.3 // 6608 /// ENST00	SMO	NM_005631	1.52205	tumor up vs normal
NM_005205 // COX6A2 // cytochrome c oxidase subunit VIa polypeptide 2 // 16p //	COX6A2	NM_005205	1.63341	tumor up vs normal
NM_173662 // RNF175 // ring finger protein 175 // 4q31.3 // 285533 /// ENST00000	RNF175	NM_173662	1.5605	tumor up vs normal
AK291605 // FAM115A // family with sequence similarity 115, member A // 7q35 //	FAM115A	AK291605	1.76893	tumor up vs normal
NM_016591 // GCNT4 // glucosaminyl (N-acetyl) transferase 4, core 2 // 5q12 // 5	GCNT4	NM_016591	1.54647	tumor up vs normal
NM_206866 // BACH1 // BTB and CNC homology 1, basic leucine zipper transcription	BACH1	NM_206866	-1.62063	tumor down vs normal
NM_005215 // DCC // deleted in colorectal carcinoma // 18q21.3 // 1630 /// ENST0	DCC	NM_005215	1.61454	tumor up vs normal
NM_152397 // IQCF1 // IQ motif containing F1 // 3p21.2 // 132141 /// ENST0000031	IQCF1	NM_152397	1.76208	tumor up vs normal
NM_001878 // CRABP2 // cellular retinoic acid binding protein 2 // 1q21.3 // 138	CRABP2	NM_001878	1.90098	tumor up vs normal
NM_004102 // FABP3 // fatty acid binding protein 3, muscle and heart (mammary-de	FABP3	NM_004102	1.95972	tumor up vs normal
NR_027692 // PHF1 // PHD finger protein 1 // 6p21.3 // 5252 /// NM_024165 // PHF	PHF1	NR_027692	1.58147	tumor up vs normal
NM_004598 // SPOCK1 // sparc/osteonectin, cwcv and kazal-like domains proteoglyc	SPOCK1	NM_004598	-1.99924	tumor down vs normal
NM_004558 // NRTN // neurturin // 19p13.3 // 4902 /// ENST00000303212 // NRTN //	NRTN	NM_004558	1.48646	tumor up vs normal
NM_007178 // STRAP // serine/threonine kinase receptor associated protein // 12p	STRAP	NM_007178	-1.56349	tumor down vs normal
NM_145894 // KLK12 // kallikrein-related peptidase 12 // 19q13.33 // 43849 /// N	KLK12	NM_145894	-1.73107	tumor down vs normal
NM_033502 // TRERF1 // transcriptional regulating factor 1 // 6p21.1-p12.1 // 55	TRERF1	NM_033502	1.53119	tumor up vs normal
NM_000321 // RB1 // retinoblastoma 1 // 13q14.2 // 5925 /// ENST00000267163 // R	RB1	NM_000321	-1.65019	tumor down vs normal
NM_001142462 // OSR2 // odd-skipped related 2 (Drosophila) // 8q22.2 // 116039 /	OSR2	NM_001142462	1.73834	tumor up vs normal
NM_001008727 // ZNF121 // zinc finger protein 121 // 19p // 7675 /// ENST0000032	ZNF121	NM_001008727	-1.6914	tumor down vs normal
NM_003473 // STAM // signal transducing adaptor molecule (SH3 domain and ITAM mo	STAM	NM_003473	-1.65789	tumor down vs normal
NM_019063 // EML4 // echinoderm microtubule associated protein like 4 // 2p21 //	EML4	NM_019063	-1.64322	tumor down vs normal
NM_004877 // GMFG // glia maturation factor, gamma // 19q13.2 // 9535 /// ENST00	GMFG	NM_004877	-1.7869	tumor down vs normal
NM_001127649 // PEX26 // peroxisomal biogenesis factor 26 // 22q11.21 // 55670 /	PEX26	NM_001127649	1.48802	tumor up vs normal
NM_005654 // NR2F1 // nuclear receptor subfamily 2, group F, member 1 // 5q14 //	NR2F1	NM_005654	1.66058	tumor up vs normal
NM_001530 // HIF1A // hypoxia inducible factor 1, alpha subunit (basic helix-loo	HIF1A	NM_001530	-1.66754	tumor down vs normal
NM_001170464 // CDK17 // cyclin-dependent kinase 17 // 12q23.1 // 5128 /// NM_00	CDK17	NM_001170464	-1.62344	tumor down vs normal
NM_012278 // ITGB1BP2 // integrin beta 1 binding protein (melusin) 2 // Xq12-q13	ITGB1BP2	NM_012278	1.60791	tumor up vs normal
NM_018323 // PI4K2B // phosphatidylinositol 4-kinase type 2 beta // 4p15.2 // 55	PI4K2B	NM_018323	-1.61973	tumor down vs normal
NM_001035267 // RPL41 // ribosomal protein L41 // 12q13 // 6171 /// NM_021104 //	RPL41	NM_001035267	1.65458	tumor up vs normal
NM_013309 // SLC30A4 // solute carrier family 30 (zinc transporter), member 4 //	SLC30A4	NM_013309	-1.84675	tumor down vs normal
AF151906 // FAM18B1 // family with sequence similarity 18, member B1 // 17p11.2	FAM18B1	AF151906	1.73726	tumor up vs normal
NM_001004356 // FGFRL1 // fibroblast growth factor receptor-like 1 // 4p16 // 53	FGFRL1	NM_001004356	-1.56624	tumor down vs normal
NM_001163809 // WDR81 // WD repeat domain 81 // 17p13.3 // 124997 /// NM_152348	WDR81	NM_001163809	1.49148	tumor up vs normal
NM_170754 // TENC1 // tensin like C1 domain containing phosphatase (tensin 2) //	TENC1	NM_170754	1.6017	tumor up vs normal
NM_001025252 // TPD52 // tumor protein D52 // 8q21 // 7163 /// NM_001025253 // T	TPD52	NM_001025252	-1.83782	tumor down vs normal
NM_181715 // CRTC2 // CREB regulated transcription coactivator 2 // 1q21.3 // 20	CRTC2	NM_181715	1.5395	tumor up vs normal
NM_001025237 // TSPAN4 // tetraspanin 4 // 11p15.5 // 7106 /// NM_001025235 // T	TSPAN4	NM_001025237	1.62218	tumor up vs normal
NM_000259 // MYO5A // myosin VA (heavy chain 12, myoxin) // 15q21 // 4644 /// NM	MYO5A	NM_000259	-1.54186	tumor down vs normal
NM_023014 // PRAMEF2 // PRAME family member 2 // 1p36.21 // 65122 /// NM_0010246	PRAMEF2	NM_023014	1.56957	tumor up vs normal
NM_020056 // HLA-DQA2 // major histocompatibility complex, class II, DQ alpha 2	HLA-DQA2	NM_020056	-1.60994	tumor down vs normal
NM_001369 // DNAH5 // dynein, axonemal, heavy chain 5 // 5p15.2 // 1767 /// ENST	DNAH5	NM_001369	-1.84598	tumor down vs normal
NM_183422 // TSC22D1 // TSC22 domain family, member 1 // 13q14 // 8848 /// NM_00	TSC22D1	NM_183422	-1.71884	tumor down vs normal
NM_004180 // TANK // TRAF family member-associated NFKB activator // 2q24-q31 //	TANK	NM_004180	-1.65904	tumor down vs normal
NM_000629 // IFNAR1 // interferon (alpha, beta and omega) receptor 1 // 21q22.1|	IFNAR1	NM_000629	-1.80184	tumor down vs normal
NM_145301 // FAM18B2 // family with sequence similarity 18, member B2 // 17p12 /	FAM18B2	NM_145301	1.47738	tumor up vs normal
NM_002231 // CD82 // CD82 molecule // 11p11.2 // 3732 /// NM_001024844 // CD82 /	CD82	NM_002231	1.56552	tumor up vs normal
NM_003382 // VIPR2 // vasoactive intestinal peptide receptor 2 // 7q36.3 // 7434	VIPR2	NM_003382	1.74068	tumor up vs normal
NM_002957 // RXRA // retinoid X receptor, alpha // 9q34.3 // 6256 /// ENST000004	RXRA	NM_002957	1.61521	tumor up vs normal
NM_021213 // PCTP // phosphatidylcholine transfer protein // 17q21-q24 // 58488	PCTP	NM_021213	-1.62236	tumor down vs normal
NR_024532 // ALG2 // asparagine-linked glycosylation 2, alpha-1,3-mannosyltransf	ALG2	NR_024532	-1.55991	tumor down vs normal
NM_001707 // BCL7B // B-cell CLL/lymphoma 7B // 7q11.23 // 9275 /// NM_001197244	BCL7B	NM_001707	1.57822	tumor up vs normal
AY423734 // SH3KBP1 // SH3-domain kinase binding protein 1 // Xp22.1-p21.3 // 30	SH3KBP1	AY423734	-1.6031	tumor down vs normal
NM_001098515 // MRGPRF // MAS-related GPR, member F // 11q13.3 // 116535 /// NM_	MRGPRF	NM_001098515	1.65326	tumor up vs normal
NM_002525 // NRD1 // nardilysin (N-arginine dibasic convertase) // 1p32.2-p32.1	NRD1	NM_002525	-1.5814	tumor down vs normal
NM_005156 // ROD1 // ROD1 regulator of differentiation 1 (S. pombe) // 9q32 // 9	ROD1	NM_005156	-1.63192	tumor down vs normal
NM_015668 // RGS22 // regulator of G-protein signaling 22 // 8q22.2 // 26166 ///	RGS22	NM_015668	1.50779	tumor up vs normal
NM_012205 // HAAO // 3-hydroxyanthranilate 3,4-dioxygenase // 2p21 // 23498 ///	HAAO	NM_012205	1.62158	tumor up vs normal
NM_020967 // NCOA5 // nuclear receptor coactivator 5 // 20q12-q13.12 // 57727 //	NCOA5	NM_020967	-1.56863	tumor down vs normal
NM_019891 // ERO1LB // ERO1-like beta (S. cerevisiae) // 1q42.2-q43 // 56605 ///	ERO1LB	NM_019891	-1.57046	tumor down vs normal
NM_005573 // LMNB1 // lamin B1 // 5q23.2 // 4001 /// NM_001198557 // LMNB1 // la	LMNB1	NM_005573	-1.52608	tumor down vs normal
NM_018641 // CHST12 // carbohydrate (chondroitin 4) sulfotransferase 12 // 7p22	CHST12	NM_018641	1.56927	tumor up vs normal
NM_001001850 // STX19 // syntaxin 19 // 3q11 // 415117 /// ENST00000315099 // ST	STX19	NM_001001850	-1.67199	tumor down vs normal
NM_032217 // ANKRD17 // ankyrin repeat domain 17 // 4q13.3 // 26057 /// NM_19888	ANKRD17	NM_032217	-1.54004	tumor down vs normal
NM_001136557 // GPR107 // G protein-coupled receptor 107 // 9q34.11 // 57720 ///	GPR107	NM_001136557	-1.69778	tumor down vs normal
NM_004378 // CRABP1 // cellular retinoic acid binding protein 1 // 15q24 // 1381	CRABP1	NM_004378	1.68634	tumor up vs normal
NM_014186 // COMMD9 // COMM domain containing 9 // 11p13 // 29099 /// NM_0011016	COMMD9	NM_014186	1.58621	tumor up vs normal
NM_130759 // GIMAP1 // GTPase, IMAP family member 1 // 7q36.1 // 170575 /// ENST	GIMAP1	NM_130759	1.55589	tumor up vs normal
NM_001194 // HCN2 // hyperpolarization activated cyclic nucleotide-gated potassi	HCN2	NM_001194	-1.49692	tumor down vs normal
NM_015570 // AUTS2 // autism susceptibility candidate 2 // 7q11.22 // 26053 ///	AUTS2	NM_015570	1.56524	tumor up vs normal
NR_001542 // TTTY10 // testis-specific transcript, Y-linked 10 (non-protein codi	TTTY10	NR_001542	1.52425	tumor up vs normal
NM_024552 // LASS4 // LAG1 homolog, ceramide synthase 4 // 19p13.2 // 79603 ///	LASS4	NM_024552	-1.65546	tumor down vs normal
NM_006559 // KHDRBS1 // KH domain containing, RNA binding, signal transduction a	KHDRBS1	NM_006559	-1.54983	tumor down vs normal
NM_015069 // ZNF423 // zinc finger protein 423 // 16q12 // 23090 /// ENST0000026	ZNF423	NM_015069	1.55756	tumor up vs normal
NM_004946 // DOCK2 // dedicator of cytokinesis 2 // 5q35.1 // 1794 /// ENST00000	DOCK2	NM_004946	-1.51267	tumor down vs normal
NM_205845 // AKR1C2 // aldo-keto reductase family 1, member C2 (dihydrodiol dehy	AKR1C2	NM_205845	1.58693	tumor up vs normal
NR_024388 // LOC152217 // hypothetical LOC152217 // 3q29 // 152217 /// ENST00000	LOC152217	NR_024388	1.71427	tumor up vs normal
NM_005686 // SOX13 // SRY (sex determining region Y)-box 13 // 1q32 // 9580 ///	SOX13	NM_005686	1.56503	tumor up vs normal
NM_001111035 // ACP5 // acid phosphatase 5, tartrate resistant // 19p13.3-p13.2	ACP5	NM_001111035	1.85331	tumor up vs normal
NM_001193511 // MAP3K12 // mitogen-activated protein kinase kinase kinase 12 //	MAP3K12	NM_001193511	1.52478	tumor up vs normal
NM_001127178 // PIGG // phosphatidylinositol glycan anchor biosynthesis, class G	PIGG	NM_001127178	-1.49272	tumor down vs normal
NM_020988 // GNAO1 // guanine nucleotide binding protein (G protein), alpha acti	GNAO1	NM_020988	1.56492	tumor up vs normal
NM_017550 // MIER2 // mesoderm induction early response 1, family member 2 // 19	MIER2	NM_017550	1.52615	tumor up vs normal
NM_152686 // DNAJC18 // DnaJ (Hsp40) homolog, subfamily C, member 18 // 5q31.2 /	DNAJC18	NM_152686	1.54346	tumor up vs normal
NM_004184 // WARS // tryptophanyl-tRNA synthetase // 14q32.31 // 7453 /// NM_173	WARS	NM_004184	-1.76891	tumor down vs normal
NM_001134438 // PHLDB2 // pleckstrin homology-like domain, family B, member 2 //	PHLDB2	NM_001134438	1.64291	tumor up vs normal
NM_152299 // NCAPH2 // non-SMC condensin II complex, subunit H2 // 22q13.33 // 2	NCAPH2	NM_152299	1.50391	tumor up vs normal
NM_001848 // COL6A1 // collagen, type VI, alpha 1 // 21q22.3 // 1291 /// ENST000	COL6A1	NM_001848	1.70971	tumor up vs normal
NM_024901 // DENND2D // DENN/MADD domain containing 2D // 1p13.3 // 79961 /// EN	DENND2D	NM_024901	-1.61214	tumor down vs normal
BC021737 // C10orf82 // chromosome 10 open reading frame 82 // 10q25.3 // 143379	C10orf82	BC021737	1.56773	tumor up vs normal
NM_024798 // SNX22 // sorting nexin 22 // 15q22.31 // 79856 /// ENST00000325881	SNX22	NM_024798	1.47136	tumor up vs normal
NM_001007253 // ERV3 // endogenous retroviral sequence 3 // 7p12-q11|7q11.2 // 2	ERV3	NM_001007253	1.61701	tumor up vs normal
NM_024594 // PANK3 // pantothenate kinase 3 // 5q34 // 79646 /// NR_029520 // MI	PANK3	NM_024594	-1.65495	tumor down vs normal
NM_031300 // MXD3 // MAX dimerization protein 3 // 5q35.3 // 83463 /// NM_001142	MXD3	NM_031300	-1.51857	tumor down vs normal
NM_017789 // SEMA4C // sema domain, immunoglobulin domain (Ig), transmembrane do	SEMA4C	NM_017789	1.5863	tumor up vs normal
NM_017906 // PAK1IP1 // PAK1 interacting protein 1 // 6p24.2 // 55003 /// ENST00	PAK1IP1	NM_017906	-1.86518	tumor down vs normal
NM_025187 // C16orf70 // chromosome 16 open reading frame 70 // 16q22.1 // 80262	C16orf70	NM_025187	-1.72235	tumor down vs normal
NM_178568 // RTN4RL1 // reticulon 4 receptor-like 1 // 17p13.3 // 146760 /// ENS	RTN4RL1	NM_178568	-1.62816	tumor down vs normal
NM_000837 // GRINA // glutamate receptor, ionotropic, N-methyl D-aspartate-assoc	GRINA	NM_000837	1.54389	tumor up vs normal
NM_152376 // UBXN10 // UBX domain protein 10 // 1p36.12 // 127733 /// ENST000003	UBXN10	NM_152376	1.58407	tumor up vs normal
NM_018461 // PPP2R2D // protein phosphatase 2, regulatory subunit B, delta // 10	PPP2R2D	NM_018461	-1.65556	tumor down vs normal
NM_014939 // TRAPPC8 // trafficking protein particle complex 8 // 18q12.1 // 228	TRAPPC8	NM_014939	-1.61164	tumor down vs normal
NM_000099 // CST3 // cystatin C // 20p11.21 // 1471 /// ENST00000398411 // CST3	CST3	NM_000099	1.55214	tumor up vs normal
NM_007146 // VEZF1 // vascular endothelial zinc finger 1 // 17q22 // 7716 /// EN	VEZF1	NM_007146	-1.71266	tumor down vs normal
NM_021614 // KCNN2 // potassium intermediate/small conductance calcium-activated	KCNN2	NM_021614	-1.63481	tumor down vs normal
NM_012396 // PHLDA3 // pleckstrin homology-like domain, family A, member 3 // 1q	PHLDA3	NM_012396	1.52949	tumor up vs normal
NM_001135053 // SIGIRR // single immunoglobulin and toll-interleukin 1 receptor	SIGIRR	NM_001135053	-1.55432	tumor down vs normal
NM_198150 // ARSK // arylsulfatase family, member K // 5q15 // 153642 /// ENST00	ARSK	NM_198150	-1.53451	tumor down vs normal
NM_001011657 // ZMAT1 // zinc finger, matrin-type 1 // Xq21 // 84460 /// NR_0364	ZMAT1	NM_001011657	-1.634	tumor down vs normal
NM_001099640 // TMEM100 // transmembrane protein 100 // 17q22 // 55273 /// NM_01	TMEM100	NM_001099640	1.65301	tumor up vs normal
NM_002994 // CXCL5 // chemokine (C-X-C motif) ligand 5 // 4q13.3 // 6374 /// ENS	CXCL5	NM_002994	-1.62527	tumor down vs normal
NM_145341 // PDCD4 // programmed cell death 4 (neoplastic transformation inhibit	PDCD4	NM_145341	-1.7617	tumor down vs normal
NM_005194 // CEBPB // CCAAT/enhancer binding protein (C/EBP), beta // 20q13.1 //	CEBPB	NM_005194	1.51221	tumor up vs normal
NM_004756 // NUMBL // numb homolog (Drosophila)-like // 19q13.13-q13.2 // 9253 /	NUMBL	NM_004756	1.51178	tumor up vs normal
NM_012062 // DNM1L // dynamin 1-like // 12p11.21 // 10059 /// NM_012063 // DNM1L	DNM1L	NM_012062	1.72591	tumor up vs normal
NM_031461 // CRISPLD1 // cysteine-rich secretory protein LCCL domain containing	CRISPLD1	NM_031461	1.75816	tumor up vs normal
NM_001642 // APLP2 // amyloid beta (A4) precursor-like protein 2 // 11q23-q25|11	APLP2	NM_001642	-1.63785	tumor down vs normal
NM_003039 // SLC2A5 // solute carrier family 2 (facilitated glucose/fructose tra	SLC2A5	NM_003039	1.62253	tumor up vs normal
NM_052905 // FMNL2 // formin-like 2 // 2q23.3 // 114793 /// ENST00000288670 // F	FMNL2	NM_052905	-1.52279	tumor down vs normal
NM_001012334 // MDK // midkine (neurite growth-promoting factor 2) // 11p11.2 //	MDK	NM_001012334	1.86346	tumor up vs normal
NM_001353 // AKR1C1 // aldo-keto reductase family 1, member C1 (dihydrodiol dehy	AKR1C1	NM_001353	1.7926	tumor up vs normal
NM_000850 // GSTM4 // glutathione S-transferase mu 4 // 1p13.3 // 2948 /// NR_02	GSTM4	NM_000850	1.58938	tumor up vs normal
NM_020354 // ENTPD7 // ectonucleoside triphosphate diphosphohydrolase 7 // --- /	ENTPD7	NM_020354	-1.53555	tumor down vs normal
NM_002343 // LTF // lactotransferrin // 3p21.31 // 4057 /// ENST00000231751 // L	LTF	NM_002343	-2.17785	tumor down vs normal
NM_001099660 // LRRN3 // leucine rich repeat neuronal 3 // 7q31.1 // 54674 /// N	LRRN3	NM_001099660	1.655	tumor up vs normal
NM_025054 // VCPIP1 // valosin containing protein (p97)/p47 complex interacting	VCPIP1	NM_025054	-1.61713	tumor down vs normal
NM_015157 // PHLDB1 // pleckstrin homology-like domain, family B, member 1 // 11	PHLDB1	NM_015157	1.57567	tumor up vs normal
NM_004998 // MYO1E // myosin IE // 15q21-q22 // 4643 /// ENST00000288235 // MYO1	MYO1E	NM_004998	1.71156	tumor up vs normal
NM_001142648 // SAR1A // SAR1 homolog A (S. cerevisiae) // 10q22.1 // 56681 ///	SAR1A	NM_001142648	-1.5995	tumor down vs normal
NM_022486 // SUSD1 // sushi domain containing 1 // 9q31.3-q33.1 // 64420 /// ENS	SUSD1	NM_022486	-1.52478	tumor down vs normal
NM_032221 // CHD6 // chromodomain helicase DNA binding protein 6 // 20q12 // 841	CHD6	NM_032221	-1.60692	tumor down vs normal
NM_004800 // TM9SF2 // transmembrane 9 superfamily member 2 // 13q32.3 // 9375 /	TM9SF2	NM_004800	-1.85924	tumor down vs normal
NM_001099 // ACPP // acid phosphatase, prostate // 3q21-q23 // 55 /// NM_0011341	ACPP	NM_001099	-1.67171	tumor down vs normal
NM_033364 // C3orf15 // chromosome 3 open reading frame 15 // 3q12-q13.3 // 8987	C3orf15	NM_033364	1.5451	tumor up vs normal
NM_006644 // HSPH1 // heat shock 105kDa/110kDa protein 1 // 13q12.3 // 10808 ///	HSPH1	NM_006644	-1.65981	tumor down vs normal
ENST00000375520 // C10orf126 // chromosome 10 open reading frame 126 // 10p12.1	C10orf126	ENST00000375520	1.50667	tumor up vs normal
NM_001037131 // AGAP1 // ArfGAP with GTPase domain, ankyrin repeat and PH domain	AGAP1	NM_001037131	-1.56492	tumor down vs normal
NM_024769 // ASAM // adipocyte-specific adhesion molecule // 11q24.1 // 79827 //	ASAM	NM_024769	1.58924	tumor up vs normal
NR_027410 // GOLGA8B // golgin A8 family, member B // 15q14 // 440270 /// NM_001	GOLGA8B	NR_027410	-1.9161	tumor down vs normal
NR_027795 // BTN2A3 // butyrophilin, subfamily 2, member A3 // 6p22.1 // 54718 /	BTN2A3	NR_027795	1.51669	tumor up vs normal
NM_006210 // PEG3 // paternally expressed 3 // 19q13.4 // 5178 /// NM_001146184	PEG3	NM_006210	1.51056	tumor up vs normal
NM_016306 // DNAJB11 // DnaJ (Hsp40) homolog, subfamily B, member 11 // 3q27.3 /	DNAJB11	NM_016306	-1.61567	tumor down vs normal
NM_032121 // MAGT1 // magnesium transporter 1 // Xq21.1 // 84061 /// ENST0000035	MAGT1	NM_032121	-1.69725	tumor down vs normal
NM_002388 // MCM3 // minichromosome maintenance complex component 3 // 6p12 // 4	MCM3	NM_002388	1.5077	tumor up vs normal
NM_017742 // ZCCHC2 // zinc finger, CCHC domain containing 2 // 18q21.33 // 5487	ZCCHC2	NM_017742	-1.51668	tumor down vs normal
NM_020123 // TM9SF3 // transmembrane 9 superfamily member 3 // 10q24.1 // 56889	TM9SF3	NM_020123	-1.77842	tumor down vs normal
NM_032452 // JPH4 // junctophilin 4 // 14q11 // 84502 /// NM_001146028 // JPH4 /	JPH4	NM_032452	1.5498	tumor up vs normal
NM_015602 // TOR1AIP1 // torsin A interacting protein 1 // 1q24.2 // 26092 /// E	TOR1AIP1	NM_015602	1.64395	tumor up vs normal
NM_032776 // JMJD1C // jumonji domain containing 1C // 10q21.3 // 221037 /// ENS	JMJD1C	NM_032776	-1.53859	tumor down vs normal
NM_007166 // PICALM // phosphatidylinositol binding clathrin assembly protein //	PICALM	NM_007166	-2.05384	tumor down vs normal
NM_004728 // DDX21 // DEAD (Asp-Glu-Ala-Asp) box polypeptide 21 // 10q21 // 9188	DDX21	NM_004728	-1.55716	tumor down vs normal
NM_152331 // ACOT4 // acyl-CoA thioesterase 4 // 14q24.3 // 122970 /// ENST00000	ACOT4	NM_152331	1.68452	tumor up vs normal
NM_153234 // LIX1 // Lix1 homolog (chicken) // 5q15 // 167410 /// ENST0000027438	LIX1	NM_153234	1.71562	tumor up vs normal
NM_003577 // UTF1 // undifferentiated embryonic cell transcription factor 1 // 1	UTF1	NM_003577	1.51227	tumor up vs normal
NM_020772 // NUFIP2 // nuclear fragile X mental retardation protein interacting	NUFIP2	NM_020772	-1.64725	tumor down vs normal
NM_052932 // TMEM123 // transmembrane protein 123 // 11q22.1 // 114908 /// ENST0	TMEM123	NM_052932	-1.74055	tumor down vs normal
NM_153020 // RBM24 // RNA binding motif protein 24 // 6p22.3 // 221662 /// NM_00	RBM24	NM_153020	1.53229	tumor up vs normal
NM_001238 // CCNE1 // cyclin E1 // 19q12 // 898 /// NM_057182 // CCNE1 // cyclin	CCNE1	NM_001238	1.54178	tumor up vs normal
NM_020188 // C16orf61 // chromosome 16 open reading frame 61 // 16q23.2 // 56942	C16orf61	NM_020188	-1.69879	tumor down vs normal
NM_018110 // DOK4 // docking protein 4 // 16q21 // 55715 /// ENST00000340099 //	DOK4	NM_018110	1.61913	tumor up vs normal
NM_020125 // SLAMF8 // SLAM family member 8 // 1q23.2 // 56833 /// ENST000002897	SLAMF8	NM_020125	-1.54769	tumor down vs normal
NM_014241 // PTPLA // protein tyrosine phosphatase-like (proline instead of cata	PTPLA	NM_014241	1.53083	tumor up vs normal
NM_002872 // RAC2 // ras-related C3 botulinum toxin substrate 2 (rho family, sma	RAC2	NM_002872	-1.65319	tumor down vs normal
NM_005707 // PDCD7 // programmed cell death 7 // 15q22.31 // 10081 /// ENST00000	PDCD7	NM_005707	-1.58686	tumor down vs normal
NM_052897 // MBD6 // methyl-CpG binding domain protein 6 // --- // 114785 /// EN	MBD6	NM_052897	1.59537	tumor up vs normal
NM_001197 // BIK // BCL2-interacting killer (apoptosis-inducing) // 22q13.31 //	BIK	NM_001197	-1.56985	tumor down vs normal
NM_152383 // DIS3L2 // DIS3 mitotic control homolog (S. cerevisiae)-like 2 // 2q	DIS3L2	NM_152383	1.46971	tumor up vs normal
NM_001058 // TACR1 // tachykinin receptor 1 // 2p12 // 6869 /// NM_015727 // TAC	TACR1	NM_001058	1.53285	tumor up vs normal
NM_004884 // IGDCC3 // immunoglobulin superfamily, DCC subclass, member 3 // 15q	IGDCC3	NM_004884	-1.44868	tumor down vs normal
NM_005550 // KIFC3 // kinesin family member C3 // 16q13-q21 // 3801 /// NM_00113	KIFC3	NM_005550	1.47808	tumor up vs normal
NM_001190329 // ATP5G3 // ATP synthase, H+ transporting, mitochondrial Fo comple	ATP5G3	NM_001190329	1.54525	tumor up vs normal
NM_001012631 // IL32 // interleukin 32 // 16p13.3 // 9235 /// NM_004221 // IL32	IL32	NM_001012631	-1.69218	tumor down vs normal
NR_000034 // TMEM185B // transmembrane protein 185B (pseudogene) // 2q14.2 // 79	TMEM185B	NR_000034	-1.75706	tumor down vs normal
NM_152493 // ZNF362 // zinc finger protein 362 // 1p35.1 // 149076 /// ENST00000	ZNF362	NM_152493	1.59551	tumor up vs normal
NM_058230 // ZNF354B // zinc finger protein 354B // 5q35.3 // 117608 /// NM_0011	ZNF354B	NM_058230	-1.59905	tumor down vs normal
NM_033280 // SEC11C // SEC11 homolog C (S. cerevisiae) // 18q21.32 // 90701 ///	SEC11C	NM_033280	-1.79703	tumor down vs normal
NR_028287 // GABARAPL3 // GABA(A) receptors associated protein like 3, pseudogen	GABARAPL3	NR_028287	1.5588	tumor up vs normal
NM_021143 // ZNF20 // zinc finger protein 20 // 19p13.2 // 7568 /// ENST00000334	ZNF20	NM_021143	1.52562	tumor up vs normal
NM_022735 // ACBD3 // acyl-CoA binding domain containing 3 // 1q42.12 // 64746 /	ACBD3	NM_022735	-1.60345	tumor down vs normal
NM_173512 // SLC38A11 // solute carrier family 38, member 11 // 2q24.3 // 151258	SLC38A11	NM_173512	-1.80389	tumor down vs normal
NM_152739 // HOXA9 // homeobox A9 // 7p15.2 // 3205 /// BC006537 // HOXA9 // hom	HOXA9	NM_152739	-1.62571	tumor down vs normal
NM_001085458 // CTNND1 // catenin (cadherin-associated protein), delta 1 // 11q1	CTNND1	NM_001085458	-1.58889	tumor down vs normal
NM_178834 // LAYN // layilin // 11q23.1 // 143903 /// ENST00000375614 // LAYN //	LAYN	NM_178834	1.51407	tumor up vs normal
NM_012082 // ZFPM2 // zinc finger protein, multitype 2 // 8q23 // 23414 /// ENST	ZFPM2	NM_012082	1.62408	tumor up vs normal
NM_145740 // GSTA1 // glutathione S-transferase alpha 1 // 6p12.1 // 2938 /// EN	GSTA1	NM_145740	1.85412	tumor up vs normal
NM_002979 // SCP2 // sterol carrier protein 2 // 1p32 // 6342 /// NM_001193599 /	SCP2	NM_002979	-1.7438	tumor down vs normal
NM_016001 // UTP18 // UTP18, small subunit (SSU) processome component, homolog (	UTP18	NM_016001	-1.57503	tumor down vs normal
NM_138799 // MBOAT2 // membrane bound O-acyltransferase domain containing 2 // 2	MBOAT2	NM_138799	-1.84712	tumor down vs normal
NM_001164372 // GPN3 // GPN-loop GTPase 3 // 12q24.11 // 51184 /// NM_001164373	GPN3	NM_001164372	-1.7375	tumor down vs normal
NM_032433 // ZNF333 // zinc finger protein 333 // 19p13 // 84449 /// ENST0000029	ZNF333	NM_032433	1.49523	tumor up vs normal
NM_024508 // ZBED2 // zinc finger, BED-type containing 2 // 3q13.2 // 79413 ///	ZBED2	NM_024508	1.62812	tumor up vs normal
NM_018237 // CCAR1 // cell division cycle and apoptosis regulator 1 // 10q21.3 /	CCAR1	NM_018237	-1.54867	tumor down vs normal
NM_003764 // STX11 // syntaxin 11 // 6q24.2 // 8676 /// ENST00000367568 // STX11	STX11	NM_003764	-1.53108	tumor down vs normal
NM_020809 // ARHGAP20 // Rho GTPase activating protein 20 // 11q23.1 // 57569 //	ARHGAP20	NM_020809	1.53719	tumor up vs normal
NM_032776 // JMJD1C // jumonji domain containing 1C // 10q21.3 // 221037 /// NM_	JMJD1C	NM_032776	-1.63727	tumor down vs normal
NM_001042550 // SMC2 // structural maintenance of chromosomes 2 // 9q31.1 // 105	SMC2	NM_001042550	-1.50591	tumor down vs normal
NM_015294 // TRIM37 // tripartite motif-containing 37 // 17q23.2 // 4591 /// NM_	TRIM37	NM_015294	-1.5398	tumor down vs normal
NM_016201 // AMOTL2 // angiomotin like 2 // 3q21-q22 // 51421 /// ENST0000024988	AMOTL2	NM_016201	1.54392	tumor up vs normal
NM_001135565 // HDHD1 // haloacid dehalogenase-like hydrolase domain containing	HDHD1	NM_001135565	-1.67497	tumor down vs normal
NM_001135179 // ZDHHC3 // zinc finger, DHHC-type containing 3 // 3p21.31 // 5130	ZDHHC3	NM_001135179	1.49234	tumor up vs normal
NM_002375 // MAP4 // microtubule-associated protein 4 // 3p21 // 4134 /// NM_001	MAP4	NM_002375	1.53987	tumor up vs normal
NM_014398 // LAMP3 // lysosomal-associated membrane protein 3 // 3q26.3-q27 // 2	LAMP3	NM_014398	-1.6408	tumor down vs normal
BC004406 // KIAA1539 // KIAA1539 // 9p13.3 // 80256 /// ENST00000378561 // KIAA1	KIAA1539	BC004406	1.49409	tumor up vs normal
NM_004465 // FGF10 // fibroblast growth factor 10 // 5p13-p12 // 2255 /// ENST00	FGF10	NM_004465	1.59454	tumor up vs normal
NR_028337 // FLJ45079 // FLJ45079 protein // 17q25.3 // 400624 /// ENST000003749	FLJ45079	NR_028337	1.54535	tumor up vs normal
NM_004226 // STK17B // serine/threonine kinase 17b // 2q32.3 // 9262 /// ENST000	STK17B	NM_004226	-1.86805	tumor down vs normal
NM_004521 // KIF5B // kinesin family member 5B // 10p11.22 // 3799 /// ENST00000	KIF5B	NM_004521	-1.817	tumor down vs normal
NM_017434 // DUOX1 // dual oxidase 1 // 15q15.3 // 53905 /// NM_175940 // DUOX1	DUOX1	NM_017434	1.59853	tumor up vs normal
NM_181303 // NLGN3 // neuroligin 3 // Xq13.1 // 54413 /// NM_018977 // NLGN3 //	NLGN3	NM_181303	1.59972	tumor up vs normal
NM_172140 // IL29 // interleukin 29 (interferon, lambda 1) // 19q13.13 // 282618	IL29	NM_172140	1.60465	tumor up vs normal
NM_014395 // DAPP1 // dual adaptor of phosphotyrosine and 3-phosphoinositides //	DAPP1	NM_014395	-1.51729	tumor down vs normal
NM_052853 // ADCK2 // aarF domain containing kinase 2 // 7q34 // 90956 /// ENST0	ADCK2	NM_052853	1.49999	tumor up vs normal
NM_001982 // ERBB3 // v-erb-b2 erythroblastic leukemia viral oncogene homolog 3	ERBB3	NM_001982	-1.69866	tumor down vs normal
NM_007274 // ACOT7 // acyl-CoA thioesterase 7 // 1p36 // 11332 /// NM_181864 //	ACOT7	NM_007274	1.45439	tumor up vs normal
NM_024330 // SLC27A3 // solute carrier family 27 (fatty acid transporter), membe	SLC27A3	NM_024330	1.51273	tumor up vs normal
NM_004671 // PIAS2 // protein inhibitor of activated STAT, 2 // 18q21.1 // 9063	PIAS2	NM_004671	-1.62392	tumor down vs normal
NM_006300 // ZNF230 // zinc finger protein 230 // 19q13.31 // 7773 /// NM_013360	ZNF230	NM_006300	1.48749	tumor up vs normal
NM_015646 // RAP1B // RAP1B, member of RAS oncogene family // 12q14 // 5908 ///	RAP1B	NM_015646	1.85739	tumor up vs normal
NM_004463 // FGD1 // FYVE, RhoGEF and PH domain containing 1 // Xp11.21 // 2245	FGD1	NM_004463	1.51836	tumor up vs normal
NM_006495 // EVI2B // ecotropic viral integration site 2B // 17q11.2 // 2124 ///	EVI2B	NM_006495	-1.67325	tumor down vs normal
NM_012156 // EPB41L1 // erythrocyte membrane protein band 4.1-like 1 // 20q11.2-	EPB41L1	NM_012156	1.52509	tumor up vs normal
NM_002416 // CXCL9 // chemokine (C-X-C motif) ligand 9 // 4q21 // 4283 /// ENST0	CXCL9	NM_002416	-1.95962	tumor down vs normal
NM_176863 // PSME3 // proteasome (prosome, macropain) activator subunit 3 (PA28	PSME3	NM_176863	-1.59138	tumor down vs normal
NM_015355 // SUZ12 // suppressor of zeste 12 homolog (Drosophila) // 17q11.2 //	SUZ12	NM_015355	-1.74675	tumor down vs normal
---		---	1.68423	tumor up vs normal
NM_018659 // CYTL1 // cytokine-like 1 // 4p16-p15 // 54360 /// ENST00000307746 /	CYTL1	NM_018659	1.78408	tumor up vs normal
NM_006358 // SLC25A17 // solute carrier family 25 (mitochondrial carrier; peroxi	SLC25A17	NM_006358	-1.63681	tumor down vs normal
NM_152713 // STT3A // STT3, subunit of the oligosaccharyltransferase complex, ho	STT3A	NM_152713	-1.70814	tumor down vs normal
NM_001130967 // ZNF385A // zinc finger protein 385A // 12q13.13 // 25946 /// NM_	ZNF385A	NM_001130967	1.58298	tumor up vs normal
NM_017775 // TTC19 // tetratricopeptide repeat domain 19 // 17p12 // 54902 /// E	TTC19	NM_017775	-1.67096	tumor down vs normal
NM_001399 // EDA // ectodysplasin A // Xq12-q13.1 // 1896 /// NM_001005609 // ED	EDA	NM_001399	1.50095	tumor up vs normal
NM_002964 // S100A8 // S100 calcium binding protein A8 // 1q21 // 6279 /// ENST0	S100A8	NM_002964	-1.81633	tumor down vs normal
NM_030796 // VOPP1 // vesicular, overexpressed in cancer, prosurvival protein 1	VOPP1	NM_030796	-1.51361	tumor down vs normal
NM_181600 // KRTAP13-4 // keratin associated protein 13-4 // 21q22.1 // 284827 /	KRTAP13-4	NM_181600	1.62757	tumor up vs normal
NM_014510 // PCLO // piccolo (presynaptic cytomatrix protein) // 7q11.23-q21.3 /	PCLO	NM_014510	1.52389	tumor up vs normal
NM_001352 // DBP // D site of albumin promoter (albumin D-box) binding protein /	DBP	NM_001352	1.54998	tumor up vs normal
NM_024093 // C2orf49 // chromosome 2 open reading frame 49 // 2q12.1 // 79074 //	C2orf49	NM_024093	1.52809	tumor up vs normal
NM_000371 // TTR // transthyretin // 18q12.1 // 7276 /// ENST00000237014 // TTR	TTR	NM_000371	1.60898	tumor up vs normal
NM_006732 // FOSB // FBJ murine osteosarcoma viral oncogene homolog B // 19q13.3	FOSB	NM_006732	-1.55775	tumor down vs normal
NM_001175 // ARHGDIB // Rho GDP dissociation inhibitor (GDI) beta // 12p12.3 //	ARHGDIB	NM_001175	-1.70772	tumor down vs normal
NM_001096 // ACLY // ATP citrate lyase // 17q21.2 // 47 /// NM_198830 // ACLY //	ACLY	NM_001096	-1.73604	tumor down vs normal
NM_182532 // TMEM61 // transmembrane protein 61 // 1p32.3 // 199964 /// ENST0000	TMEM61	NM_182532	1.49538	tumor up vs normal
NM_030938 // TMEM49 // transmembrane protein 49 // 17q23.1 // 81671 /// NR_02949	TMEM49	NM_030938	-1.71627	tumor down vs normal
NM_012319 // SLC39A6 // solute carrier family 39 (zinc transporter), member 6 //	SLC39A6	NM_012319	-1.74516	tumor down vs normal
NM_023074 // ZNF649 // zinc finger protein 649 // 19q13.41 // 65251 /// NM_19848	ZNF649	NM_023074	-1.72778	tumor down vs normal
NM_020373 // ANO2 // anoctamin 2 // 12p13.3 // 57101 /// ENST00000327087 // ANO2	ANO2	NM_020373	1.49701	tumor up vs normal
NM_001083535 // CEP57L1 // centrosomal protein 57kDa-like 1 // 6q21 // 285753 //	CEP57L1	NM_001083535	1.54981	tumor up vs normal
NM_021783 // EDA2R // ectodysplasin A2 receptor // Xq12 // 60401 /// ENST0000037	EDA2R	NM_021783	1.54601	tumor up vs normal
NM_001029998 // SLC10A7 // solute carrier family 10 (sodium/bile acid cotranspor	SLC10A7	NM_001029998	-1.56792	tumor down vs normal
NM_020639 // RIPK4 // receptor-interacting serine-threonine kinase 4 // 21q22.3	RIPK4	NM_020639	1.54438	tumor up vs normal
NM_006314 // CNKSR1 // connector enhancer of kinase suppressor of Ras 1 // 1p36.	CNKSR1	NM_006314	1.53077	tumor up vs normal
NM_006815 // TMED2 // transmembrane emp24 domain trafficking protein 2 // 12q24.	TMED2	NM_006815	-1.67154	tumor down vs normal
NM_001135993 // TTC39C // tetratricopeptide repeat domain 39C // 18q11.2 // 1254	TTC39C	NM_001135993	-1.57132	tumor down vs normal
NM_001048226 // DBNDD2 // dysbindin (dystrobrevin binding protein 1) domain cont	DBNDD2	NM_001048226	1.61526	tumor up vs normal
NM_033061 // KRTAP4-7 // keratin associated protein 4-7 // 17q21.2 // 100132476	KRTAP4-7	NM_033061	1.58659	tumor up vs normal
NM_012139 // SERGEF // secretion regulating guanine nucleotide exchange factor /	SERGEF	NM_012139	-1.6428	tumor down vs normal
NM_153810 // C10orf46 // chromosome 10 open reading frame 46 // 10q26.11 // 1433	C10orf46	NM_153810	-1.55715	tumor down vs normal
NM_138639 // BCL2L12 // BCL2-like 12 (proline rich) // 19q13.3 // 83596 /// NM_0	BCL2L12	NM_138639	1.5826	tumor up vs normal
NM_054108 // HRASLS5 // HRAS-like suppressor family, member 5 // 11q13.2 // 1172	HRASLS5	NM_054108	1.5377	tumor up vs normal
NM_022131 // CLSTN2 // calsyntenin 2 // 3q23 // 64084 /// ENST00000458420 // CLS	CLSTN2	NM_022131	1.83809	tumor up vs normal
NM_145056 // DACT3 // dapper, antagonist of beta-catenin, homolog 3 (Xenopus lae	DACT3	NM_145056	1.57039	tumor up vs normal
NM_012254 // SLC27A5 // solute carrier family 27 (fatty acid transporter), membe	SLC27A5	NM_012254	1.49825	tumor up vs normal
NM_004327 // BCR // breakpoint cluster region // 22q11|22q11.23 // 613 /// NM_02	BCR	NM_004327	1.6274	tumor up vs normal
AK098818 // ZDHHC20 // zinc finger, DHHC-type containing 20 // 13q12.11 // 25383	ZDHHC20	AK098818	-1.69177	tumor down vs normal
NM_000261 // MYOC // myocilin, trabecular meshwork inducible glucocorticoid resp	MYOC	NM_000261	1.67441	tumor up vs normal
NM_144970 // CXorf38 // chromosome X open reading frame 38 // Xp11.4 // 159013 /	CXorf38	NM_144970	1.55357	tumor up vs normal
NM_003223 // TFAP4 // transcription factor AP-4 (activating enhancer binding pro	TFAP4	NM_003223	1.54574	tumor up vs normal
NR_015343 // LOC389458 // hypothetical LOC389458 // 7p22.1 // 389458	LOC389458	NR_015343	-1.56383	tumor down vs normal
NM_007250 // KLF8 // Kruppel-like factor 8 // Xp11.21 // 11279 /// NM_001159296	KLF8	NM_007250	1.48326	tumor up vs normal
NM_006961 // ZNF19 // zinc finger protein 19 // 16q22 // 7567 /// ENST0000028817	ZNF19	NM_006961	1.53516	tumor up vs normal
NM_001033677 // CABP1 // calcium binding protein 1 // 12q24.31 // 9478 /// NM_03	CABP1	NM_001033677	1.51571	tumor up vs normal
NM_025179 // PLXNA2 // plexin A2 // 1q32.2 // 5362 /// ENST00000367033 // PLXNA2	PLXNA2	NM_025179	1.50408	tumor up vs normal
BC036545 // PLAC2 // placenta-specific 2 (non-protein coding) // 19p13.3 // 2570	PLAC2	BC036545	1.49276	tumor up vs normal
NM_005176 // ATP5G2 // ATP synthase, H+ transporting, mitochondrial Fo complex,	ATP5G2	NM_005176	-1.57371	tumor down vs normal
NM_002822 // TWF1 // twinfilin, actin-binding protein, homolog 1 (Drosophila) //	TWF1	NM_002822	-1.5407	tumor down vs normal
NM_018715 // RCC2 // regulator of chromosome condensation 2 // 1p36.13 // 55920	RCC2	NM_018715	-1.5538	tumor down vs normal
NM_145725 // TRAF3 // TNF receptor-associated factor 3 // 14q32.32 // 7187 /// N	TRAF3	NM_145725	-1.53194	tumor down vs normal
NM_014952 // BAHD1 // bromo adjacent homology domain containing 1 // 15q15.1 //	BAHD1	NM_014952	1.55515	tumor up vs normal
NM_032590 // KDM2B // lysine (K)-specific demethylase 2B // 12q24.31 // 84678 //	KDM2B	NM_032590	1.49841	tumor up vs normal
NM_018398 // CACNA2D3 // calcium channel, voltage-dependent, alpha 2/delta subun	CACNA2D3	NM_018398	1.53826	tumor up vs normal
NM_001080431 // SLC45A4 // solute carrier family 45, member 4 // 8q24.3 // 57210	SLC45A4	NM_001080431	1.64338	tumor up vs normal
NM_005328 // HAS2 // hyaluronan synthase 2 // 8q24.12 // 3037 /// ENST0000030392	HAS2	NM_005328	1.50724	tumor up vs normal
NM_017843 // BCAS4 // breast carcinoma amplified sequence 4 // 20q13.13 // 55653	BCAS4	NM_017843	1.56503	tumor up vs normal
NM_007361 // NID2 // nidogen 2 (osteonidogen) // 14q22.1 // 22795 /// ENST000002	NID2	NM_007361	1.52697	tumor up vs normal
NM_145206 // VTI1A // vesicle transport through interaction with t-SNAREs homolo	VTI1A	NM_145206	-1.52956	tumor down vs normal
NM_006494 // ERF // Ets2 repressor factor // 19q13 // 2077 /// ENST00000222329 /	ERF	NM_006494	1.63454	tumor up vs normal
NM_012214 // MGAT4A // mannosyl (alpha-1,3-)-glycoprotein beta-1,4-N-acetylgluco	MGAT4A	NM_012214	-1.64986	tumor down vs normal
NM_001134479 // LRRC8D // leucine rich repeat containing 8 family, member D // 1	LRRC8D	NM_001134479	-1.65042	tumor down vs normal
NM_003010 // MAP2K4 // mitogen-activated protein kinase kinase 4 // 17p11.2 // 6	MAP2K4	NM_003010	-1.69323	tumor down vs normal
NM_000093 // COL5A1 // collagen, type V, alpha 1 // 9q34.2-q34.3 // 1289 /// ENS	COL5A1	NM_000093	1.54904	tumor up vs normal
NM_002475 // MYL6B // myosin, light chain 6B, alkali, smooth muscle and non-musc	MYL6B	NM_002475	1.60216	tumor up vs normal
NM_014699 // ZNF646 // zinc finger protein 646 // 16p11.2 // 9726 /// NM_024706	ZNF646	NM_014699	1.50781	tumor up vs normal
NM_198949 // NUDT1 // nudix (nucleoside diphosphate linked moiety X)-type motif	NUDT1	NM_198949	1.60031	tumor up vs normal
NM_031957 // KRTAP1-5 // keratin associated protein 1-5 // 17q12-q21 // 83895 //	KRTAP1-5	NM_031957	1.65311	tumor up vs normal
NM_022771 // TBC1D15 // TBC1 domain family, member 15 // 12q21.1 // 64786 /// NM	TBC1D15	NM_022771	-1.66436	tumor down vs normal
NM_032560 // SMEK1 // SMEK homolog 1, suppressor of mek1 (Dictyostelium) // 14q3	SMEK1	NM_032560	-1.51645	tumor down vs normal
NM_003257 // TJP1 // tight junction protein 1 (zona occludens 1) // 15q13 // 708	TJP1	NM_003257	-1.64798	tumor down vs normal
NM_133466 // ZFP82 // zinc finger protein 82 homolog (mouse) // 19q13.12 // 2844	ZFP82	NM_133466	1.58144	tumor up vs normal
NM_000701 // ATP1A1 // ATPase, Na+/K+ transporting, alpha 1 polypeptide // 1p21	ATP1A1	NM_000701	-1.53504	tumor down vs normal
NM_001025780 // FAM108B1 // family with sequence similarity 108, member B1 // 9q	FAM108B1	NM_001025780	-1.53188	tumor down vs normal
NM_144566 // ZNF700 // zinc finger protein 700 // 19p13.2 // 90592 /// NM_001012	ZNF700	NM_144566	-1.49692	tumor down vs normal
NM_004490 // GRB14 // growth factor receptor-bound protein 14 // 2q22-q24 // 288	GRB14	NM_004490	1.53591	tumor up vs normal
NM_032975 // DTNA // dystrobrevin, alpha // 18q12 // 1837 /// NM_001390 // DTNA	DTNA	NM_032975	1.54496	tumor up vs normal
NM_000073 // CD3G // CD3g molecule, gamma (CD3-TCR complex) // 11q23 // 917 ///	CD3G	NM_000073	-1.64683	tumor down vs normal
NM_198081 // SCML4 // sex comb on midleg-like 4 (Drosophila) // 6q21 // 256380 /	SCML4	NM_198081	-1.50766	tumor down vs normal
NM_007011 // ABHD2 // abhydrolase domain containing 2 // 15q26.1 // 11057 /// NM	ABHD2	NM_007011	-1.7437	tumor down vs normal
NM_152704 // FAM123A // family with sequence similarity 123A // 13q12.13 // 2192	FAM123A	NM_152704	1.49806	tumor up vs normal
NM_014932 // NLGN1 // neuroligin 1 // 3q26.31 // 22871 /// ENST00000457714 // NL	NLGN1	NM_014932	1.66057	tumor up vs normal
NM_032510 // PARD6G // par-6 partitioning defective 6 homolog gamma (C. elegans)	PARD6G	NM_032510	1.56715	tumor up vs normal
NM_016286 // DCXR // dicarbonyl/L-xylulose reductase // 17q25.3 // 51181 /// NM_	DCXR	NM_016286	-1.63232	tumor down vs normal
AK290833 // C11orf74 // chromosome 11 open reading frame 74 // 11p12 // 119710 /	C11orf74	AK290833	1.55537	tumor up vs normal
NM_015368 // PANX1 // pannexin 1 // 11q21 // 24145 /// ENST00000227638 // PANX1	PANX1	NM_015368	-1.61945	tumor down vs normal
NM_018471 // ZC3H15 // zinc finger CCCH-type containing 15 // 2q32.1 // 55854 //	ZC3H15	NM_018471	-1.64156	tumor down vs normal
NM_052875 // VPS26B // vacuolar protein sorting 26 homolog B (S. pombe) // 11q25	VPS26B	NM_052875	-1.58924	tumor down vs normal
NM_004951 // GPR183 // G protein-coupled receptor 183 // 13q32.3 // 1880 /// ENS	GPR183	NM_004951	-1.57346	tumor down vs normal
NM_032305 // POLR3GL // polymerase (RNA) III (DNA directed) polypeptide G (32kD)	POLR3GL	NM_032305	1.54496	tumor up vs normal
NM_001080519 // BAHCC1 // BAH domain and coiled-coil containing 1 // 17q25.3 //	BAHCC1	NM_001080519	-1.59534	tumor down vs normal
NM_017966 // VPS37C // vacuolar protein sorting 37 homolog C (S. cerevisiae) //	VPS37C	NM_017966	1.67317	tumor up vs normal
NM_145167 // PIGM // phosphatidylinositol glycan anchor biosynthesis, class M //	PIGM	NM_145167	-1.75798	tumor down vs normal
NM_018328 // MBD5 // methyl-CpG binding domain protein 5 // 2q23.1 // 55777 ///	MBD5	NM_018328	1.53286	tumor up vs normal
NM_001198696 // AIFM2 // apoptosis-inducing factor, mitochondrion-associated, 2	AIFM2	NM_001198696	1.50408	tumor up vs normal
NM_002690 // POLB // polymerase (DNA directed), beta // 8p11.2 // 5423 /// ENST0	POLB	NM_002690	-1.68806	tumor down vs normal
NM_152545 // RASGEF1B // RasGEF domain family, member 1B // 4q21.21 // 153020 //	RASGEF1B	NM_152545	-1.53621	tumor down vs normal
BC050462 // C2orf84 // chromosome 2 open reading frame 84 // 2p23.3 // 653140 //	C2orf84	BC050462	1.49037	tumor up vs normal
NM_001177802 // RANGRF // RAN guanine nucleotide release factor // 17p13.1 // 29	RANGRF	NM_001177802	1.55456	tumor up vs normal
NM_018949 // UTS2R // urotensin 2 receptor // 17q25.3 // 2837 /// ENST0000031313	UTS2R	NM_018949	-1.50647	tumor down vs normal
NM_004609 // TCF15 // transcription factor 15 (basic helix-loop-helix) // 20p13	TCF15	NM_004609	1.54405	tumor up vs normal
NM_007209 // RPL35 // ribosomal protein L35 // 9q34.1 // 11224 /// ENST000003484	RPL35	NM_007209	2.16451	tumor up vs normal
NM_005277 // GPM6A // glycoprotein M6A // 4q34 // 2823 /// NM_201591 // GPM6A //	GPM6A	NM_005277	1.71807	tumor up vs normal
NM_144975 // SLFN5 // schlafen family member 5 // 17q12 // 162394 /// ENST000002	SLFN5	NM_144975	-1.62481	tumor down vs normal
NR_033403 // BMP1 // bone morphogenetic protein 1 // 8p21.3 // 649 /// NM_006129	BMP1	NR_033403	1.48662	tumor up vs normal
NM_014153 // ZC3H7A // zinc finger CCCH-type containing 7A // 16p13-p12 // 29066	ZC3H7A	NM_014153	-1.60331	tumor down vs normal
NM_025103 // IFT74 // intraflagellar transport 74 homolog (Chlamydomonas) // 9p2	IFT74	NM_025103	-1.53013	tumor down vs normal
NM_012445 // SPON2 // spondin 2, extracellular matrix protein // 4p16.3 // 10417	SPON2	NM_012445	-2.33475	tumor down vs normal
NM_173468 // MOBKL1A // MOB1, Mps One Binder kinase activator-like 1A (yeast) //	MOBKL1A	NM_173468	-1.60818	tumor down vs normal
NM_002496 // NDUFS8 // NADH dehydrogenase (ubiquinone) Fe-S protein 8, 23kDa (NA	NDUFS8	NM_002496	1.64375	tumor up vs normal
NM_199330 // HOMER2 // homer homolog 2 (Drosophila) // 15q24.3 // 9455 /// NM_00	HOMER2	NM_199330	-1.78023	tumor down vs normal
NM_012454 // TIAM2 // T-cell lymphoma invasion and metastasis 2 // 6q25.2 // 262	TIAM2	NM_012454	1.49719	tumor up vs normal
NM_016304 // RSL24D1 // ribosomal L24 domain containing 1 // 15q21 // 51187 ///	RSL24D1	NM_016304	-1.68003	tumor down vs normal
NM_020240 // CDC42SE2 // CDC42 small effector 2 // 5q31.1 // 56990 /// NM_001038	CDC42SE2	NM_020240	-1.66975	tumor down vs normal
NM_021803 // IL21 // interleukin 21 // 4q26-q27 // 59067 /// ENST00000264497 //	IL21	NM_021803	1.56822	tumor up vs normal
NM_001443 // FABP1 // fatty acid binding protein 1, liver // 2p11 // 2168 /// EN	FABP1	NM_001443	1.52397	tumor up vs normal
NM_020832 // ZNF687 // zinc finger protein 687 // 1q21.3 // 57592 /// ENST000003	ZNF687	NM_020832	1.53538	tumor up vs normal
NM_017563 // IL17RD // interleukin 17 receptor D // 3p14.3 // 54756 /// ENST0000	IL17RD	NM_017563	1.5064	tumor up vs normal
NM_007262 // PARK7 // Parkinson disease (autosomal recessive, early onset) 7 //	PARK7	NM_007262	-1.67132	tumor down vs normal
NM_016938 // EFEMP2 // EGF-containing fibulin-like extracellular matrix protein	EFEMP2	NM_016938	1.7421	tumor up vs normal
NM_014485 // HPGDS // hematopoietic prostaglandin D synthase // 4q22.3 // 27306	HPGDS	NM_014485	1.60751	tumor up vs normal
NM_012290 // TLK1 // tousled-like kinase 1 // 2q31.1 // 9874 /// NM_001136554 //	TLK1	NM_012290	-1.57364	tumor down vs normal
NR_036467 // IFFO1 // intermediate filament family orphan 1 // 12p13.3 // 25900	IFFO1	NR_036467	1.51918	tumor up vs normal
NM_177455 // BHLHA15 // basic helix-loop-helix family, member a15 // 7q21.3 // 1	BHLHA15	NM_177455	-1.74982	tumor down vs normal
NM_001006658 // CR2 // complement component (3d/Epstein Barr virus) receptor 2 /	CR2	NM_001006658	1.5288	tumor up vs normal
NM_021211 // ZBED5 // zinc finger, BED-type containing 5 // 11p15.3 // 58486 ///	ZBED5	NM_021211	-1.74261	tumor down vs normal
NM_152390 // TMEM178 // transmembrane protein 178 // 2p22.1 // 130733 /// NM_001	TMEM178	NM_152390	-1.89791	tumor down vs normal
NM_024302 // MMP28 // matrix metallopeptidase 28 // 17q21.1 // 79148 /// NM_0010	MMP28	NM_024302	1.47372	tumor up vs normal
NM_001142343 // CMKLR1 // chemokine-like receptor 1 // 12q24.1 // 1240 /// NM_00	CMKLR1	NM_001142343	-1.4994	tumor down vs normal
NM_004676 // PRY // PTPN13-like, Y-linked // Yq11.223 // 9081 /// NM_001002758 /	PRY	NM_004676	1.63174	tumor up vs normal
NM_001003793 // RBMS3 // RNA binding motif, single stranded interacting protein	RBMS3	NM_001003793	1.60867	tumor up vs normal
NM_198993 // STAC2 // SH3 and cysteine rich domain 2 // 17q12 // 342667 /// ENST	STAC2	NM_198993	1.50756	tumor up vs normal
NM_017515 // SLC35F2 // solute carrier family 35, member F2 // 11q22.3 // 54733	SLC35F2	NM_017515	-1.84027	tumor down vs normal
NM_003001 // SDHC // succinate dehydrogenase complex, subunit C, integral membra	SDHC	NM_003001	-1.87165	tumor down vs normal
NM_001080437 // SNED1 // sushi, nidogen and EGF-like domains 1 // 2q37.3 // 2599	SNED1	NM_001080437	1.47333	tumor up vs normal
NM_032900 // ARHGAP19 // Rho GTPase activating protein 19 // 10q24.1 // 84986 //	ARHGAP19	NM_032900	-1.59093	tumor down vs normal
NM_018339 // RFK // riboflavin kinase // 9q21.13 // 55312 /// ENST00000376736 //	RFK	NM_018339	-1.52218	tumor down vs normal
NM_030774 // OR51E2 // olfactory receptor, family 51, subfamily E, member 2 // 1	OR51E2	NM_030774	-2.73407	tumor down vs normal
NM_024719 // GRTP1 // growth hormone regulated TBC protein 1 // 13q34 // 79774 /	GRTP1	NM_024719	-1.54476	tumor down vs normal
NM_001167830 // TMED5 // transmembrane emp24 protein transport domain containing	TMED5	NM_001167830	-1.70922	tumor down vs normal
NM_000502 // EPX // eosinophil peroxidase // 17q23.1 // 8288 /// NR_002307 // MS	EPX	NM_000502	1.51008	tumor up vs normal
NM_014682 // ST18 // suppression of tumorigenicity 18 (breast carcinoma) (zinc f	ST18	NM_014682	1.52069	tumor up vs normal
NM_001365 // DLG4 // discs, large homolog 4 (Drosophila) // 17p13.1 // 1742 ///	DLG4	NM_001365	1.52394	tumor up vs normal
NM_018092 // NETO2 // neuropilin (NRP) and tolloid (TLL)-like 2 // 16q11 // 8183	NETO2	NM_018092	-1.68189	tumor down vs normal
NM_178820 // FBXO27 // F-box protein 27 // 19q13.2 // 126433 /// ENST00000292853	FBXO27	NM_178820	1.52275	tumor up vs normal

## Sheet: CAcancer vs. CAnormal
Supplemental Table S3b. 865 genes differentially expressed (2-way ANOVA, >1.5 fold changes) in CA cancer vs. CA matched-normal control.
gene_assignment	Gene Symbol	RefSeq	FoldChange(CA cancer vs. CA normal)	Description (CA cancer vs. CA normal)
NM_020230 // PPAN // peter pan homolog (Drosophila) // 19p13 // 56342 /// NM_001	PPAN	NM_020230	1.73194	tumor up vs normal
NM_003387 // WIPF1 // WAS/WASL interacting protein family, member 1 // 2q31.1 //	WIPF1	NM_003387	-2.16861	tumor down vs normal
NM_181756 // ZNF233 // zinc finger protein 233 // 19q13.31 // 353355 /// ENST000	ZNF233	NM_181756	1.76376	tumor up vs normal
NM_020978 // AMY2B // amylase, alpha 2B (pancreatic) // 1p21 // 280 /// NM_00403	AMY2B	NM_020978	-2.30682	tumor down vs normal
NM_001164 // APBB1 // amyloid beta (A4) precursor protein-binding, family B, mem	APBB1	NM_001164	1.65659	tumor up vs normal
NM_022156 // DUS1L // dihydrouridine synthase 1-like (S. cerevisiae) // 17q25.3	DUS1L	NM_022156	2.08877	tumor up vs normal
NM_176894 // P2RY13 // purinergic receptor P2Y, G-protein coupled, 13 // 3q24 //	P2RY13	NM_176894	-1.93045	tumor down vs normal
NM_002006 // FGF2 // fibroblast growth factor 2 (basic) // 4q26 // 2247 /// NM_0	FGF2	NM_002006	-2.07892	tumor down vs normal
NM_005676 // RBM10 // RNA binding motif protein 10 // Xp11.23 // 8241 /// NM_152	RBM10	NM_005676	1.75609	tumor up vs normal
NM_000396 // CTSK // cathepsin K // 1q21 // 1513 /// ENST00000271651 // CTSK //	CTSK	NM_000396	-2.12681	tumor down vs normal
NM_020130 // C8orf4 // chromosome 8 open reading frame 4 // 8p11.2 // 56892 ///	C8orf4	NM_020130	-2.12751	tumor down vs normal
NM_016009 // SH3GLB1 // SH3-domain GRB2-like endophilin B1 // 1p22 // 51100 ///	SH3GLB1	NM_016009	-2.34927	tumor down vs normal
NM_005531 // IFI16 // interferon, gamma-inducible protein 16 // 1q22 // 3428 ///	IFI16	NM_005531	-2.24335	tumor down vs normal
NM_005582 // CD180 // CD180 molecule // 5q12 // 4064 /// ENST00000256447 // CD18	CD180	NM_005582	-1.89836	tumor down vs normal
BC018109 // C1orf109 // chromosome 1 open reading frame 109 // 1p34.3 // 54955 /	C1orf109	BC018109	1.6122	tumor up vs normal
NM_023926 // ZSCAN18 // zinc finger and SCAN domain containing 18 // 19q13.43 //	ZSCAN18	NM_023926	1.68883	tumor up vs normal
NM_182488 // USP12 // ubiquitin specific peptidase 12 // 13q12.13 // 219333 ///	USP12	NM_182488	-1.87957	tumor down vs normal
NM_001040402 // DCUN1D4 // DCN1, defective in cullin neddylation 1, domain conta	DCUN1D4	NM_001040402	-2.01102	tumor down vs normal
NM_000455 // STK11 // serine/threonine kinase 11 // 19p13.3 // 6794 /// ENST0000	STK11	NM_000455	1.76845	tumor up vs normal
NM_001134649 // EIF4E3 // eukaryotic translation initiation factor 4E family mem	EIF4E3	NM_001134649	-2.03437	tumor down vs normal
NM_017957 // EPN3 // epsin 3 // 17q21.33 // 55040 /// ENST00000268933 // EPN3 //	EPN3	NM_017957	1.65789	tumor up vs normal
NM_021928 // SPCS3 // signal peptidase complex subunit 3 homolog (S. cerevisiae)	SPCS3	NM_021928	-2.21005	tumor down vs normal
NM_015897 // PIAS4 // protein inhibitor of activated STAT, 4 // 19p13.3 // 51588	PIAS4	NM_015897	1.68267	tumor up vs normal
NM_172231 // SUGP1 // SURP and G patch domain containing 1 // 19p13.11 // 57794	SUGP1	NM_172231	1.54378	tumor up vs normal
NM_032932 // RAB11FIP4 // RAB11 family interacting protein 4 (class II) // 17q11	RAB11FIP4	NM_032932	1.59291	tumor up vs normal
NM_173514 // SLC38A9 // solute carrier family 38, member 9 // 5q11.2 // 153129 /	SLC38A9	NM_173514	-1.73302	tumor down vs normal
NM_175060 // CLEC14A // C-type lectin domain family 14, member A // 14q21.1 // 1	CLEC14A	NM_175060	1.56841	tumor up vs normal
NM_003721 // RFXANK // regulatory factor X-associated ankyrin-containing protein	RFXANK	NM_003721	2.0413	tumor up vs normal
NM_032478 // MRPL38 // mitochondrial ribosomal protein L38 // 17q25.3 // 64978 /	MRPL38	NM_032478	1.71394	tumor up vs normal
NM_003265 // TLR3 // toll-like receptor 3 // 4q35 // 7098 /// ENST00000296795 //	TLR3	NM_003265	-2.09336	tumor down vs normal
NM_005886 // KATNB1 // katanin p80 (WD repeat containing) subunit B 1 // 16q21 /	KATNB1	NM_005886	1.61372	tumor up vs normal
NM_003666 // BLZF1 // basic leucine zipper nuclear factor 1 // 1q24 // 8548 ///	BLZF1	NM_003666	-1.85836	tumor down vs normal
NM_152519 // C2orf67 // chromosome 2 open reading frame 67 // 2q34 // 151050 ///	C2orf67	NM_152519	-1.64122	tumor down vs normal
NM_001145374 // ALKBH2 // alkB, alkylation repair homolog 2 (E. coli) // 12q24.1	ALKBH2	NM_001145374	2.04445	tumor up vs normal
NM_018405 // C17orf79 // chromosome 17 open reading frame 79 // 17q11.2 // 55352	C17orf79	NM_018405	1.82678	tumor up vs normal
NM_030783 // PTDSS2 // phosphatidylserine synthase 2 // 11p15.5 // 81490 /// ENS	PTDSS2	NM_030783	1.7071	tumor up vs normal
NM_024784 // ZBTB3 // zinc finger and BTB domain containing 3 // 11q12.3 // 7984	ZBTB3	NM_024784	1.72271	tumor up vs normal
NR_030740 // ZNF667 // zinc finger protein 667 // 19q13.43 // 63934 /// NM_02210	ZNF667	NR_030740	1.69119	tumor up vs normal
NM_031485 // GRWD1 // glutamate-rich WD repeat containing 1 // 19q13.33 // 83743	GRWD1	NM_031485	1.80817	tumor up vs normal
NM_001171690 // GCAT // glycine C-acetyltransferase // 22q13.1 // 23464 /// NM_0	GCAT	NM_001171690	2.09297	tumor up vs normal
NM_021158 // TRIB3 // tribbles homolog 3 (Drosophila) // 20p13-p12.2 // 57761 //	TRIB3	NM_021158	1.7101	tumor up vs normal
NM_025128 // MUS81 // MUS81 endonuclease homolog (S. cerevisiae) // 11q13 // 801	MUS81	NM_025128	1.63502	tumor up vs normal
NM_138807 // C3orf31 // chromosome 3 open reading frame 31 // 3p25.2 // 132001 /	C3orf31	NM_138807	-1.65361	tumor down vs normal
NM_002148 // HOXD10 // homeobox D10 // 2q31.1 // 3236 /// ENST00000249501 // HOX	HOXD10	NM_002148	-1.84289	tumor down vs normal
NM_032935 // MT4 // metallothionein 4 // 16q13 // 84560 /// ENST00000219162 // M	MT4	NM_032935	-1.94146	tumor down vs normal
NM_015140 // TTLL12 // tubulin tyrosine ligase-like family, member 12 // 22q13.3	TTLL12	NM_015140	2.02286	tumor up vs normal
NM_030662 // MAP2K2 // mitogen-activated protein kinase kinase 2 // 19p13.3 // 5	MAP2K2	NM_030662	1.84642	tumor up vs normal
NM_003689 // AKR7A2 // aldo-keto reductase family 7, member A2 (aflatoxin aldehy	AKR7A2	NM_003689	-1.94953	tumor down vs normal
NM_016433 // GLTP // glycolipid transfer protein // 12q24.11 // 51228 /// ENST00	GLTP	NM_016433	1.90064	tumor up vs normal
NM_000669 // ADH1C // alcohol dehydrogenase 1C (class I), gamma polypeptide // 4	ADH1C	NM_000669	-2.07354	tumor down vs normal
NM_006287 // TFPI // tissue factor pathway inhibitor (lipoprotein-associated coa	TFPI	NM_006287	-1.95892	tumor down vs normal
NM_174905 // FAM98C // family with sequence similarity 98, member C // 19q13.2 /	FAM98C	NM_174905	1.81196	tumor up vs normal
NM_174896 // C1orf162 // chromosome 1 open reading frame 162 // 1p13.2 // 128346	C1orf162	NM_174896	-1.97886	tumor down vs normal
NM_001024210 // S100A13 // S100 calcium binding protein A13 // 1q21 // 6284 ///	S100A13	NM_001024210	-2.2546	tumor down vs normal
NM_002638 // PI3 // peptidase inhibitor 3, skin-derived // 20q13.12 // 5266 ///	PI3	NM_002638	-2.26177	tumor down vs normal
NM_014214 // IMPA2 // inositol(myo)-1(or 4)-monophosphatase 2 // 18p11.2 // 3613	IMPA2	NM_014214	1.97347	tumor up vs normal
NM_018317 // TBC1D19 // TBC1 domain family, member 19 // 4p15.2 // 55296 /// ENS	TBC1D19	NM_018317	-1.81798	tumor down vs normal
NM_018303 // EXOC2 // exocyst complex component 2 // 6p25.3 // 55770 /// ENST000	EXOC2	NM_018303	-1.68015	tumor down vs normal
NM_001078 // VCAM1 // vascular cell adhesion molecule 1 // 1p32-p31 // 7412 ///	VCAM1	NM_001078	-1.94202	tumor down vs normal
NM_002203 // ITGA2 // integrin, alpha 2 (CD49B, alpha 2 subunit of VLA-2 recepto	ITGA2	NM_002203	-1.98239	tumor down vs normal
NM_001803 // CD52 // CD52 molecule // 1p36 // 1043 /// ENST00000374213 // CD52 /	CD52	NM_001803	-3.19712	tumor down vs normal
NM_024805 // RBFA // ribosome binding factor A (putative) // 18q23 // 79863 ///	RBFA	NM_024805	1.66153	tumor up vs normal
NM_016219 // MAN1B1 // mannosidase, alpha, class 1B, member 1 // 9q34 // 11253 /	MAN1B1	NM_016219	1.7005	tumor up vs normal
NM_198516 // GALNTL4 // UDP-N-acetyl-alpha-D-galactosamine:polypeptide N-acetylg	GALNTL4	NM_198516	1.62767	tumor up vs normal
NM_199187 // KRT18 // keratin 18 // 12q13 // 3875 /// NM_000224 // KRT18 // kera	KRT18	NM_199187	1.89442	tumor up vs normal
NM_001111322 // DDX54 // DEAD (Asp-Glu-Ala-Asp) box polypeptide 54 // 12q24.13 /	DDX54	NM_001111322	1.64097	tumor up vs normal
NM_032611 // PTP4A3 // protein tyrosine phosphatase type IVA, member 3 // 8q24.3	PTP4A3	NM_032611	2.11039	tumor up vs normal
NM_153223 // CEP120 // centrosomal protein 120kDa // 5q23.2 // 153241 /// NM_001	CEP120	NM_153223	-1.6871	tumor down vs normal
NM_033070 // CECR5 // cat eye syndrome chromosome region, candidate 5 // --- //	CECR5	NM_033070	1.78242	tumor up vs normal
NM_014026 // DCPS // decapping enzyme, scavenger // 11q24.2 // 28960 /// ENST000	DCPS	NM_014026	1.74255	tumor up vs normal
NM_001749 // CAPNS1 // calpain, small subunit 1 // 19q13.12 // 826 /// NM_001003	CAPNS1	NM_001749	1.98807	tumor up vs normal
NM_019086 // VSIG10 // V-set and immunoglobulin domain containing 10 // 12q24.23	VSIG10	NM_019086	1.62726	tumor up vs normal
NM_001130861 // CLDN5 // claudin 5 // 22q11.21 // 7122 /// NM_003277 // CLDN5 //	CLDN5	NM_001130861	1.86939	tumor up vs normal
NM_004696 // SLC16A4 // solute carrier family 16, member 4 (monocarboxylic acid	SLC16A4	NM_004696	-1.79971	tumor down vs normal
NM_006666 // RUVBL2 // RuvB-like 2 (E. coli) // 19q13.3 // 10856 /// ENST0000022	RUVBL2	NM_006666	2.07661	tumor up vs normal
NM_001670 // ARVCF // armadillo repeat gene deleted in velocardiofacial syndrome	ARVCF	NM_001670	1.64063	tumor up vs normal
NM_023075 // MPPE1 // metallophosphoesterase 1 // 18p11.21 // 65258 /// ENST0000	MPPE1	NM_023075	1.68624	tumor up vs normal
NR_036542 // CARS // cysteinyl-tRNA synthetase // 11p15.5 // 833 /// NM_00101443	CARS	NR_036542	1.71375	tumor up vs normal
NM_000888 // ITGB6 // integrin, beta 6 // 2q24.2 // 3694 /// ENST00000283249 //	ITGB6	NM_000888	-1.97133	tumor down vs normal
NM_003546 // HIST1H4L // histone cluster 1, H4l // 6p22.1 // 8368 /// BC069392 /	HIST1H4L	NM_003546	-2.08802	tumor down vs normal
NM_014661 // FAM53B // family with sequence similarity 53, member B // 10q26.13	FAM53B	NM_014661	1.65284	tumor up vs normal
NM_016292 // TRAP1 // TNF receptor-associated protein 1 // 16p13.3 // 10131 ///	TRAP1	NM_016292	1.9858	tumor up vs normal
NM_002343 // LTF // lactotransferrin // 3p21.31 // 4057 /// ENST00000231751 // L	LTF	NM_002343	-2.77131	tumor down vs normal
NM_001014831 // PAK4 // p21 protein (Cdc42/Rac)-activated kinase 4 // 19q13.2 //	PAK4	NM_001014831	1.75249	tumor up vs normal
NR_015427 // NCRNA00094 // non-protein coding RNA 94 // 9q34 // 266655 /// BC053	NCRNA00094	NR_015427	1.58047	tumor up vs normal
NM_006029 // PNMA1 // paraneoplastic antigen MA1 // 14q24.3 // 9240 /// ENST0000	PNMA1	NM_006029	1.77181	tumor up vs normal
NM_006675 // TSPAN9 // tetraspanin 9 // 12p13.33-p13.32 // 10867 /// NM_00116832	TSPAN9	NM_006675	1.79287	tumor up vs normal
NM_016440 // VRK3 // vaccinia related kinase 3 // 19q13 // 51231 /// NM_00102577	VRK3	NM_016440	1.78604	tumor up vs normal
NM_001195056 // DDIT3 // DNA-damage-inducible transcript 3 // 12q13.1-q13.2 // 1	DDIT3	NM_001195056	-1.9244	tumor down vs normal
NM_004155 // SERPINB9 // serpin peptidase inhibitor, clade B (ovalbumin), member	SERPINB9	NM_004155	-1.77484	tumor down vs normal
NM_005804 // DDX39 // DEAD (Asp-Glu-Ala-Asp) box polypeptide 39 // 19p13.12 // 1	DDX39	NM_005804	1.73041	tumor up vs normal
NM_015392 // NPDC1 // neural proliferation, differentiation and control, 1 // 9q	NPDC1	NM_015392	1.89595	tumor up vs normal
NM_181705 // LYRM7 // Lyrm7 homolog (mouse) // 5q23.3 // 90624 /// ENST000003793	LYRM7	NM_181705	-1.83792	tumor down vs normal
NM_030943 // AMN // amnionless homolog (mouse) // 14q32.3 // 81693 /// ENST00000	AMN	NM_030943	1.57868	tumor up vs normal
NM_021008 // DEAF1 // deformed epidermal autoregulatory factor 1 (Drosophila) //	DEAF1	NM_021008	1.7199	tumor up vs normal
NM_001114752 // CD55 // CD55 molecule, decay accelerating factor for complement	CD55	NM_001114752	-1.79066	tumor down vs normal
NM_001098402 // ZNF295 // zinc finger protein 295 // 21q22.3 // 49854 /// NM_020	ZNF295	NM_001098402	-1.59886	tumor down vs normal
NM_006551 // SCGB1D2 // secretoglobin, family 1D, member 2 // 11q13 // 10647 ///	SCGB1D2	NM_006551	-2.39805	tumor down vs normal
NM_003531 // HIST1H3C // histone cluster 1, H3c // 6p21.3 // 8352 /// BC127610 /	HIST1H3C	NM_003531	-3.03604	tumor down vs normal
NM_207644 // C22orf36 // chromosome 22 open reading frame 36 // 22q11.23 // 3888	C22orf36	NM_207644	1.66614	tumor up vs normal
NM_052853 // ADCK2 // aarF domain containing kinase 2 // 7q34 // 90956 /// ENST0	ADCK2	NM_052853	1.57272	tumor up vs normal
NM_005946 // MT1A // metallothionein 1A // 16q13 // 4489 /// NM_005953 // MT2A /	MT1A	NM_005946	-2.53593	tumor down vs normal
NM_005525 // HSD11B1 // hydroxysteroid (11-beta) dehydrogenase 1 // 1q32-q41 //	HSD11B1	NM_005525	-1.76744	tumor down vs normal
NM_018264 // TYW1 // tRNA-yW synthesizing protein 1 homolog (S. cerevisiae) // 7	TYW1	NM_018264	-1.78067	tumor down vs normal
NM_173468 // MOBKL1A // MOB1, Mps One Binder kinase activator-like 1A (yeast) //	MOBKL1A	NM_173468	-1.85088	tumor down vs normal
NM_015886 // PI15 // peptidase inhibitor 15 // 8q21.11 // 51050 /// ENST00000260	PI15	NM_015886	-3.07723	tumor down vs normal
NM_001008401 // ZNF761 // zinc finger protein 761 // 19q13.42 // 388561 /// ENST	ZNF761	NM_001008401	2.39896	tumor up vs normal
NM_001040107 // HVCN1 // hydrogen voltage-gated channel 1 // 12q24.11 // 84329 /	HVCN1	NM_001040107	1.58444	tumor up vs normal
NM_006135 // CAPZA1 // capping protein (actin filament) muscle Z-line, alpha 1 /	CAPZA1	NM_006135	-2.15159	tumor down vs normal
NM_006505 // PVR // poliovirus receptor // 19q13.2 // 5817 /// NM_001135768 // P	PVR	NM_006505	1.64111	tumor up vs normal
NM_178507 // OAF // OAF homolog (Drosophila) // 11q23.3 // 220323 /// ENST000003	OAF	NM_178507	1.70884	tumor up vs normal
NM_024590 // ARSJ // arylsulfatase family, member J // 4q26 // 79642 /// ENST000	ARSJ	NM_024590	-1.78322	tumor down vs normal
NM_015666 // GTPBP5 // GTP binding protein 5 (putative) // 20q13.33 // 26164 ///	GTPBP5	NM_015666	1.69614	tumor up vs normal
BC022092 // C12orf52 // chromosome 12 open reading frame 52 // 12q24.13 // 84934	C12orf52	BC022092	1.88674	tumor up vs normal
NM_020347 // LZTFL1 // leucine zipper transcription factor-like 1 // 3p21.3 // 5	LZTFL1	NM_020347	-1.69977	tumor down vs normal
NM_022154 // SLC39A8 // solute carrier family 39 (zinc transporter), member 8 //	SLC39A8	NM_022154	-1.77713	tumor down vs normal
NM_022737 // LPPR2 // lipid phosphate phosphatase-related protein type 2 // 19p1	LPPR2	NM_022737	1.72844	tumor up vs normal
NM_023931 // ZNF747 // zinc finger protein 747 // 16p11.2 // 65988 /// NM_033410	ZNF747	NM_023931	1.63313	tumor up vs normal
NM_001145847 // PROM1 // prominin 1 // 4p15.32 // 8842 /// NM_006017 // PROM1 //	PROM1	NM_001145847	-2.08229	tumor down vs normal
NM_001144995 // CCDC85C // coiled-coil domain containing 85C // 14q32.31 // 3177	CCDC85C	NM_001144995	1.69806	tumor up vs normal
NM_033415 // ARMC6 // armadillo repeat containing 6 // 19p13.11 // 93436 /// ENS	ARMC6	NM_033415	1.78976	tumor up vs normal
NM_017602 // OTUD5 // OTU domain containing 5 // Xp11.23 // 55593 /// NM_0011361	OTUD5	NM_017602	1.7288	tumor up vs normal
NM_006285 // TESK1 // testis-specific kinase 1 // 9p13 // 7016 /// ENST000003363	TESK1	NM_006285	1.71188	tumor up vs normal
NM_015085 // RAP1GAP2 // RAP1 GTPase activating protein 2 // 17p13.3 // 23108 //	RAP1GAP2	NM_015085	1.65998	tumor up vs normal
NM_006969 // ZNF28 // zinc finger protein 28 // 19q // 7576 /// NR_036599 // ZNF	ZNF28	NM_006969	1.78564	tumor up vs normal
NR_023348 // GAS8 // growth arrest-specific 8 // 16q24.3 // 2622 /// NM_001481 /	GAS8	NR_023348	1.63527	tumor up vs normal
NM_181656 // C17orf58 // chromosome 17 open reading frame 58 // 17q24.2 // 28401	C17orf58	NM_181656	1.85713	tumor up vs normal
NM_015353 // KCTD2 // potassium channel tetramerisation domain containing 2 // 1	KCTD2	NM_015353	1.65262	tumor up vs normal
NM_000757 // CSF1 // colony stimulating factor 1 (macrophage) // 1p21-p13 // 143	CSF1	NM_000757	-1.5792	tumor down vs normal
NM_033554 // HLA-DPA1 // major histocompatibility complex, class II, DP alpha 1	HLA-DPA1	NM_033554	-2.19415	tumor down vs normal
NM_000345 // SNCA // synuclein, alpha (non A4 component of amyloid precursor) //	SNCA	NM_000345	-2.14515	tumor down vs normal
NM_002104 // GZMK // granzyme K (granzyme 3; tryptase II) // 5q11.2 // 3003 ///	GZMK	NM_002104	-2.08898	tumor down vs normal
NM_020895 // GRAMD1A // GRAM domain containing 1A // 19q13.13 // 57655 /// NM_00	GRAMD1A	NM_020895	1.63225	tumor up vs normal
NM_015693 // INTU // inturned planar cell polarity effector homolog (Drosophila)	INTU	NM_015693	-1.61102	tumor down vs normal
NM_176880 // NR2C2AP // nuclear receptor 2C2-associated protein // 19p13.11 // 1	NR2C2AP	NM_176880	1.80146	tumor up vs normal
NM_005951 // MT1H // metallothionein 1H // 16q13 // 4496 /// NM_005949 // MT1F /	MT1H	NM_005951	-2.34739	tumor down vs normal
NM_032039 // ITFG3 // integrin alpha FG-GAP repeat containing 3 // 16p13.3 // 83	ITFG3	NM_032039	1.76778	tumor up vs normal
NM_000963 // PTGS2 // prostaglandin-endoperoxide synthase 2 (prostaglandin G/H s	PTGS2	NM_000963	-2.17006	tumor down vs normal
NM_130847 // AMOTL1 // angiomotin like 1 // 11q14.3 // 154810 /// ENST0000043306	AMOTL1	NM_130847	1.87471	tumor up vs normal
NM_003999 // OSMR // oncostatin M receptor // 5p13.1 // 9180 /// NM_001168355 //	OSMR	NM_003999	-1.96031	tumor down vs normal
NM_024697 // ZNF385D // zinc finger protein 385D // 3p24.3 // 79750 /// ENST0000	ZNF385D	NM_024697	-1.80284	tumor down vs normal
NM_017509 // KLK15 // kallikrein-related peptidase 15 // 19q13.41 // 55554 /// N	KLK15	NM_017509	1.57735	tumor up vs normal
NM_001135674 // C8orf40 // chromosome 8 open reading frame 40 // 8p11.21 // 1149	C8orf40	NM_001135674	-1.74146	tumor down vs normal
NM_003456 // ZNF205 // zinc finger protein 205 // 16p13.3 // 7755 /// NM_0010424	ZNF205	NM_003456	1.60857	tumor up vs normal
NM_017691 // LRRC49 // leucine rich repeat containing 49 // 15q23 // 54839 /// E	LRRC49	NM_017691	-1.72183	tumor down vs normal
NR_026961 // LOC284837 // hypothetical LOC284837 // 21q22.3 // 284837 /// AK0934	LOC284837	NR_026961	1.51941	tumor up vs normal
NM_015500 // C2CD2 // C2 calcium-dependent domain containing 2 // 21q22.3 // 259	C2CD2	NM_015500	1.76236	tumor up vs normal
NM_006455 // LEPREL4 // leprecan-like 4 // 17q21.2 // 10609 /// ENST00000355468	LEPREL4	NM_006455	1.6032	tumor up vs normal
NM_175058 // PLEKHA7 // pleckstrin homology domain containing, family A member 7	PLEKHA7	NM_175058	1.5972	tumor up vs normal
NM_024884 // L2HGDH // L-2-hydroxyglutarate dehydrogenase // 14q21.3 // 79944 //	L2HGDH	NM_024884	1.63717	tumor up vs normal
NM_024671 // ZNF768 // zinc finger protein 768 // 16p11.2 // 79724 /// ENST00000	ZNF768	NM_024671	1.65962	tumor up vs normal
NM_032270 // LRRC8C // leucine rich repeat containing 8 family, member C // 1p22	LRRC8C	NM_032270	-1.89057	tumor down vs normal
NM_207343 // RNF214 // ring finger protein 214 // 11q23.3 // 257160 /// NM_00107	RNF214	NM_207343	1.58689	tumor up vs normal
NM_031209 // QTRT1 // queuine tRNA-ribosyltransferase 1 // 19p13.3 // 81890 ///	QTRT1	NM_031209	1.83729	tumor up vs normal
NM_001798 // CDK2 // cyclin-dependent kinase 2 // 12q13 // 1017 /// NM_052827 //	CDK2	NM_001798	1.6473	tumor up vs normal
BC011833 // C19orf52 // chromosome 19 open reading frame 52 // 19p13.2 // 90580	C19orf52	BC011833	1.60985	tumor up vs normal
NM_004461 // FARSA // phenylalanyl-tRNA synthetase, alpha subunit // 19p13.2 //	FARSA	NM_004461	1.70353	tumor up vs normal
NM_032501 // ACSS1 // acyl-CoA synthetase short-chain family member 1 // 20p11.2	ACSS1	NM_032501	1.96497	tumor up vs normal
NM_017595 // NKIRAS2 // NFKB inhibitor interacting Ras-like 2 // 17q21.2 // 2851	NKIRAS2	NM_017595	1.77638	tumor up vs normal
NM_024827 // HDAC11 // histone deacetylase 11 // 3p25.1 // 79885 /// NM_00113604	HDAC11	NM_024827	1.77509	tumor up vs normal
NM_004385 // VCAN // versican // 5q14.3 // 1462 /// NM_001164097 // VCAN // vers	VCAN	NM_004385	-1.99888	tumor down vs normal
NM_004058 // CAPS // calcyphosine // 19p13.3 // 828 /// NM_080590 // CAPS // cal	CAPS	NM_004058	1.79908	tumor up vs normal
NM_013276 // SHPK // sedoheptulokinase // 17p13 // 23729 /// NM_080704 // TRPV1	SHPK	NM_013276	1.58512	tumor up vs normal
NM_003847 // PEX11A // peroxisomal biogenesis factor 11 alpha // 15q26.1 // 8800	PEX11A	NM_003847	2.107	tumor up vs normal
NM_001198533 // OXR1 // oxidation resistance 1 // 8q23 // 55074 /// NM_018002 //	OXR1	NM_001198533	-1.93204	tumor down vs normal
NM_004055 // CAPN5 // calpain 5 // 11q14 // 726 /// ENST00000278559 // CAPN5 //	CAPN5	NM_004055	1.66905	tumor up vs normal
NM_017933 // PID1 // phosphotyrosine interaction domain containing 1 // 2q36.3 /	PID1	NM_017933	-1.59797	tumor down vs normal
NM_021136 // RTN1 // reticulon 1 // 14q23.1 // 6252 /// NM_206852 // RTN1 // ret	RTN1	NM_021136	1.87863	tumor up vs normal
NM_006876 // B3GNT1 // UDP-GlcNAc:betaGal beta-1,3-N-acetylglucosaminyltransfera	B3GNT1	NM_006876	1.63304	tumor up vs normal
NM_016143 // NSFL1C // NSFL1 (p97) cofactor (p47) // 20p13 // 55968 /// NM_01883	NSFL1C	NM_016143	1.74003	tumor up vs normal
NM_032936 // TMEM60 // transmembrane protein 60 // 7q11.23 // 85025 /// ENST0000	TMEM60	NM_032936	-1.92923	tumor down vs normal
NM_014632 // MICAL2 // microtubule associated monoxygenase, calponin and LIM dom	MICAL2	NM_014632	1.83737	tumor up vs normal
NM_001143995 // LPXN // leupaxin // 11q12.1 // 9404 /// NM_004811 // LPXN // leu	LPXN	NM_001143995	-1.69488	tumor down vs normal
NM_053064 // GNG2 // guanine nucleotide binding protein (G protein), gamma 2 //	GNG2	NM_053064	-1.84729	tumor down vs normal
---		---	1.65319	tumor up vs normal
NM_002969 // MAPK12 // mitogen-activated protein kinase 12 // 22q13.33 // 6300 /	MAPK12	NM_002969	1.68358	tumor up vs normal
NM_006418 // OLFM4 // olfactomedin 4 // 13q14.3 // 10562 /// ENST00000219022 //	OLFM4	NM_006418	-4.93466	tumor down vs normal
NM_030664 // PTER // phosphotriesterase related // 10p12 // 9317 /// NM_00100148	PTER	NM_030664	-1.68721	tumor down vs normal
NM_006351 // TIMM44 // translocase of inner mitochondrial membrane 44 homolog (y	TIMM44	NM_006351	1.7199	tumor up vs normal
NM_001039469 // MARK2 // MAP/microtubule affinity-regulating kinase 2 // 11q13 /	MARK2	NM_001039469	1.6626	tumor up vs normal
AK128037 // LRRC9 // leucine rich repeat containing 9 // 14q23.1 // 341883	LRRC9	AK128037	1.91465	tumor up vs normal
NM_138462 // ZMYND19 // zinc finger, MYND-type containing 19 // 9q34.3 // 116225	ZMYND19	NM_138462	1.74083	tumor up vs normal
NM_020145 // SH3GLB2 // SH3-domain GRB2-like endophilin B2 // 9q34 // 56904 ///	SH3GLB2	NM_020145	1.76793	tumor up vs normal
NM_145160 // MAP2K5 // mitogen-activated protein kinase kinase 5 // 15q23 // 560	MAP2K5	NM_145160	1.64059	tumor up vs normal
NM_022894 // PAPOLG // poly(A) polymerase gamma // 2p16.1 // 64895 /// ENST00000	PAPOLG	NM_022894	-1.74737	tumor down vs normal
NM_001153484 // SCOC // short coiled-coil protein // 4q31.1 // 60592 /// NM_0011	SCOC	NM_001153484	-2.06126	tumor down vs normal
NM_021064 // HIST1H2AG // histone cluster 1, H2ag // 6p22.1 // 8969 /// L19778 /	HIST1H2AG	NM_021064	-1.78678	tumor down vs normal
NM_001142648 // SAR1A // SAR1 homolog A (S. cerevisiae) // 10q22.1 // 56681 ///	SAR1A	NM_001142648	-1.84934	tumor down vs normal
NM_014812 // CEP170 // centrosomal protein 170kDa // 1q44 // 9859 /// NM_0010424	CEP170	NM_014812	-2.02602	tumor down vs normal
AK123995 // LOC153684 // hypothetical LOC153684 // 5p12 // 153684 /// AK002146 /	LOC153684	AK123995	-1.58733	tumor down vs normal
NM_003977 // AIP // aryl hydrocarbon receptor interacting protein // 11q13.3 //	AIP	NM_003977	2.19747	tumor up vs normal
NM_014265 // ADAM28 // ADAM metallopeptidase domain 28 // 8p21.2 // 10863 /// NM	ADAM28	NM_014265	-1.98549	tumor down vs normal
NM_001888 // CRYM // crystallin, mu // 16p // 1428 /// NM_001014444 // CRYM // c	CRYM	NM_001888	1.89155	tumor up vs normal
NM_003624 // RANBP3 // RAN binding protein 3 // 19p13.3 // 8498 /// NM_007322 //	RANBP3	NM_003624	1.5994	tumor up vs normal
NM_001001419 // SMAD5 // SMAD family member 5 // 5q31 // 4090 /// NM_005903 // S	SMAD5	NM_001001419	-1.89959	tumor down vs normal
NM_000584 // IL8 // interleukin 8 // 4q13-q21 // 3576 /// ENST00000307407 // IL8	IL8	NM_000584	-2.4652	tumor down vs normal
NM_017709 // FAM46C // family with sequence similarity 46, member C // 1p12 // 5	FAM46C	NM_017709	-1.86799	tumor down vs normal
NM_000096 // CP // ceruloplasmin (ferroxidase) // 3q23-q25 // 1356 /// ENST00000	CP	NM_000096	-3.14009	tumor down vs normal
NM_174963 // ST3GAL3 // ST3 beta-galactoside alpha-2,3-sialyltransferase 3 // 1p	ST3GAL3	NM_174963	1.57857	tumor up vs normal
NM_020677 // NMRAL1 // NmrA-like family domain containing 1 // 16p13.3 // 57407	NMRAL1	NM_020677	1.82332	tumor up vs normal
NM_173555 // TYSND1 // trypsin domain containing 1 // 10q22.1 // 219743 /// NM_0	TYSND1	NM_173555	1.54826	tumor up vs normal
NM_080820 // DTD1 // D-tyrosyl-tRNA deacylase 1 homolog (S. cerevisiae) // 20p11	DTD1	NM_080820	1.80985	tumor up vs normal
NM_207398 // GBP7 // guanylate binding protein 7 // 1p22.2 // 388646 /// NM_0041	GBP7	NM_207398	-1.62754	tumor down vs normal
NM_005967 // NAB2 // NGFI-A binding protein 2 (EGR1 binding protein 2) // 12q13.	NAB2	NM_005967	1.60013	tumor up vs normal
NM_016010 // FAM164A // family with sequence similarity 164, member A // 8q21.12	FAM164A	NM_016010	-1.93565	tumor down vs normal
NM_006353 // HMGN4 // high mobility group nucleosomal binding domain 4 // 6p21.3	HMGN4	NM_006353	-1.76183	tumor down vs normal
NM_207380 // C15orf52 // chromosome 15 open reading frame 52 // 15q15.1 // 38811	C15orf52	NM_207380	1.6514	tumor up vs normal
NM_015670 // SENP3 // SUMO1/sentrin/SMT3 specific peptidase 3 // 17p13 // 26168	SENP3	NM_015670	1.72096	tumor up vs normal
NR_036556 // ANKRD54 // ankyrin repeat domain 54 // 22q13.1 // 129138 /// NM_138	ANKRD54	NR_036556	1.61853	tumor up vs normal
NM_001110514 // EBF4 // early B-cell factor 4 // 20p13 // 57593 /// ENST00000380	EBF4	NM_001110514	1.67821	tumor up vs normal
NM_019029 // CPVL // carboxypeptidase, vitellogenic-like // 7p15.1 // 54504 ///	CPVL	NM_019029	-1.78108	tumor down vs normal
NM_004076 // CRYBB3 // crystallin, beta B3 // 22q11.2-q12.1|22q11.23 // 1417 ///	CRYBB3	NM_004076	1.75391	tumor up vs normal
NM_013401 // RAB3IL1 // RAB3A interacting protein (rabin3)-like 1 // 11q12.2 //	RAB3IL1	NM_013401	1.64353	tumor up vs normal
NM_003926 // MBD3 // methyl-CpG binding domain protein 3 // 19p13.3 // 53615 ///	MBD3	NM_003926	1.56647	tumor up vs normal
NM_001136033 // PUF60 // poly-U binding splicing factor 60KDa // 8q24.3 // 22827	PUF60	NM_001136033	1.91524	tumor up vs normal
NM_003512 // HIST1H2AC // histone cluster 1, H2ac // 6p21.3 // 8334 /// ENST0000	HIST1H2AC	NM_003512	-1.77001	tumor down vs normal
NM_182617 // ACSM2B // acyl-CoA synthetase medium-chain family member 2B // 16p1	ACSM2B	NM_182617	2.26692	tumor up vs normal
NM_002423 // MMP7 // matrix metallopeptidase 7 (matrilysin, uterine) // 11q21-q2	MMP7	NM_002423	-3.13047	tumor down vs normal
NM_182848 // CLDN10 // claudin 10 // 13q31-q34 // 9071 /// NM_001160100 // CLDN1	CLDN10	NM_182848	-1.84852	tumor down vs normal
NM_003935 // TOP3B // topoisomerase (DNA) III beta // 22q11.22 // 8940 /// ENST0	TOP3B	NM_003935	1.53199	tumor up vs normal
NM_001077268 // ZFYVE19 // zinc finger, FYVE domain containing 19 // 15q15.1 //	ZFYVE19	NM_001077268	1.6416	tumor up vs normal
NM_033502 // TRERF1 // transcriptional regulating factor 1 // 6p21.1-p12.1 // 55	TRERF1	NM_033502	-1.79747	tumor down vs normal
NM_012140 // SLC25A10 // solute carrier family 25 (mitochondrial carrier; dicarb	SLC25A10	NM_012140	1.66907	tumor up vs normal
NM_004506 // HSF2 // heat shock transcription factor 2 // 6q22.31 // 3298 /// NM	HSF2	NM_004506	-1.65689	tumor down vs normal
NM_002349 // LY75 // lymphocyte antigen 75 // 2q24 // 4065 /// NM_014880 // CD30	LY75	NM_002349	-1.71522	tumor down vs normal
NM_138499 // PWWP2B // PWWP domain containing 2B // 10q26.3 // 170394 /// NM_001	PWWP2B	NM_138499	1.60843	tumor up vs normal
NM_002838 // PTPRC // protein tyrosine phosphatase, receptor type, C // 1q31-q32	PTPRC	NM_002838	-2.09066	tumor down vs normal
NM_003896 // ST3GAL5 // ST3 beta-galactoside alpha-2,3-sialyltransferase 5 // 2p	ST3GAL5	NM_003896	-1.64357	tumor down vs normal
NM_004607 // TBCA // tubulin folding cofactor A // 5q14.1 // 6902 /// ENST000003	TBCA	NM_004607	-2.07778	tumor down vs normal
NM_138476 // MDP1 // magnesium-dependent phosphatase 1 // 14q12 // 145553 /// EN	MDP1	NM_138476	1.7842	tumor up vs normal
NM_175065 // HIST2H2AB // histone cluster 2, H2ab // 1q21 // 317772 /// ENST0000	HIST2H2AB	NM_175065	-2.3058	tumor down vs normal
NM_001080480 // MBOAT1 // membrane bound O-acyltransferase domain containing 1 /	MBOAT1	NM_001080480	-1.7689	tumor down vs normal
NM_020126 // SPHK2 // sphingosine kinase 2 // 19q13.2 // 56848 /// ENST000002452	SPHK2	NM_020126	1.56591	tumor up vs normal
NM_001130012 // SLC9A3R2 // solute carrier family 9 (sodium/hydrogen exchanger),	SLC9A3R2	NM_001130012	1.94485	tumor up vs normal
NM_024541 // C10orf76 // chromosome 10 open reading frame 76 // 10q24.32 // 7959	C10orf76	NM_024541	-1.8072	tumor down vs normal
NM_016562 // TLR7 // toll-like receptor 7 // Xp22.3 // 51284 /// ENST00000380659	TLR7	NM_016562	-1.81437	tumor down vs normal
NM_019848 // SLC10A3 // solute carrier family 10 (sodium/bile acid cotransporter	SLC10A3	NM_019848	1.5983	tumor up vs normal
NM_014211 // GABRP // gamma-aminobutyric acid (GABA) A receptor, pi // 5q33-q34	GABRP	NM_014211	-2.64485	tumor down vs normal
NM_001099781 // GGT5 // gamma-glutamyltransferase 5 // 22q11.23 // 2687 /// NM_0	GGT5	NM_001099781	1.66125	tumor up vs normal
NM_001136219 // FCGR2A // Fc fragment of IgG, low affinity IIa, receptor (CD32)	FCGR2A	NM_001136219	-2.00189	tumor down vs normal
NM_003634 // NIPSNAP1 // nipsnap homolog 1 (C. elegans) // 22q12.2 // 8508 /// E	NIPSNAP1	NM_003634	1.7439	tumor up vs normal
NM_080861 // SPSB3 // splA/ryanodine receptor domain and SOCS box containing 3 /	SPSB3	NM_080861	1.64115	tumor up vs normal
NM_002064 // GLRX // glutaredoxin (thioltransferase) // 5q14 // 2745 /// NM_0011	GLRX	NM_002064	-1.82389	tumor down vs normal
NM_014689 // DOCK10 // dedicator of cytokinesis 10 // 2q36.2 // 55619 /// ENST00	DOCK10	NM_014689	-1.92576	tumor down vs normal
NM_004476 // FOLH1 // folate hydrolase (prostate-specific membrane antigen) 1 //	FOLH1	NM_004476	1.68869	tumor up vs normal
NM_001131025 // PEX5 // peroxisomal biogenesis factor 5 // 12p13.31 // 5830 ///	PEX5	NM_001131025	1.65753	tumor up vs normal
NM_007005 // TLE4 // transducin-like enhancer of split 4 (E(sp1) homolog, Drosop	TLE4	NM_007005	-1.56855	tumor down vs normal
NM_207112 // HAGHL // hydroxyacylglutathione hydrolase-like // 16p13.3 // 84264	HAGHL	NM_207112	1.60471	tumor up vs normal
NM_002495 // NDUFS4 // NADH dehydrogenase (ubiquinone) Fe-S protein 4, 18kDa (NA	NDUFS4	NM_002495	-1.75717	tumor down vs normal
NM_005474 // HDAC5 // histone deacetylase 5 // 17q21 // 10014 /// NM_001015053 /	HDAC5	NM_005474	1.64952	tumor up vs normal
NM_017895 // DDX27 // DEAD (Asp-Glu-Ala-Asp) box polypeptide 27 // 20q13.13 // 5	DDX27	NM_017895	1.65649	tumor up vs normal
NM_030978 // ARPC5L // actin related protein 2/3 complex, subunit 5-like // 9q33	ARPC5L	NM_030978	1.81087	tumor up vs normal
NM_002202 // ISL1 // ISL LIM homeobox 1 // 5q11.1 // 3670 /// ENST00000507619 //	ISL1	NM_002202	-1.69928	tumor down vs normal
NM_004715 // CTDP1 // CTD (carboxy-terminal domain, RNA polymerase II, polypepti	CTDP1	NM_004715	1.5828	tumor up vs normal
NR_036510 // UROD // uroporphyrinogen decarboxylase // 1p34 // 7389 /// NM_00037	UROD	NR_036510	-1.75322	tumor down vs normal
NM_145806 // ZNF511 // zinc finger protein 511 // 10q26.3 // 118472 /// ENST0000	ZNF511	NM_145806	2.11991	tumor up vs normal
NM_018841 // GNG12 // guanine nucleotide binding protein (G protein), gamma 12 /	GNG12	NM_018841	-2.06531	tumor down vs normal
NM_212492 // GPS1 // G protein pathway suppressor 1 // 17q25.3 // 2873 /// NM_00	GPS1	NM_212492	1.80986	tumor up vs normal
NM_004114 // FGF13 // fibroblast growth factor 13 // Xq26.3 // 2258 /// NM_00113	FGF13	NM_004114	1.62037	tumor up vs normal
NM_004054 // C3AR1 // complement component 3a receptor 1 // 12p13.31 // 719 ///	C3AR1	NM_004054	-1.77208	tumor down vs normal
NM_004126 // GNG11 // guanine nucleotide binding protein (G protein), gamma 11 /	GNG11	NM_004126	-1.82862	tumor down vs normal
NM_001031716 // OBFC2A // oligonucleotide/oligosaccharide-binding fold containin	OBFC2A	NM_001031716	-1.83726	tumor down vs normal
NM_005482 // PIGK // phosphatidylinositol glycan anchor biosynthesis, class K //	PIGK	NM_005482	-1.81294	tumor down vs normal
NM_006206 // PDGFRA // platelet-derived growth factor receptor, alpha polypeptid	PDGFRA	NM_006206	-1.75547	tumor down vs normal
NM_031957 // KRTAP1-5 // keratin associated protein 1-5 // 17q12-q21 // 83895 //	KRTAP1-5	NM_031957	1.76593	tumor up vs normal
NM_001621 // AHR // aryl hydrocarbon receptor // 7p15 // 196 /// ENST00000242057	AHR	NM_001621	-2.1236	tumor down vs normal
NM_206855 // QKI // quaking homolog, KH domain RNA binding (mouse) // 6q26 // 94	QKI	NM_206855	-1.93634	tumor down vs normal
NM_007223 // GPR176 // G protein-coupled receptor 176 // 15q14-q15.1 // 11245 //	GPR176	NM_007223	1.70218	tumor up vs normal
NM_173584 // EFCAB4A // EF-hand calcium binding domain 4A // 11p15.5 // 283229 /	EFCAB4A	NM_173584	1.60017	tumor up vs normal
NM_000201 // ICAM1 // intercellular adhesion molecule 1 // 19p13.3-p13.2 // 3383	ICAM1	NM_000201	-1.68039	tumor down vs normal
NM_020925 // CACHD1 // cache domain containing 1 // 1p31.3 // 57685 /// ENST0000	CACHD1	NM_020925	-1.75329	tumor down vs normal
NM_018201 // TBC1D13 // TBC1 domain family, member 13 // 9q34.11 // 54662 /// EN	TBC1D13	NM_018201	1.7387	tumor up vs normal
NM_032854 // CORO6 // coronin 6 // 17q11.2 // 84940 /// ENST00000345068 // CORO6	CORO6	NM_032854	1.54708	tumor up vs normal
NM_178001 // PPP2R4 // protein phosphatase 2A activator, regulatory subunit 4 //	PPP2R4	NM_178001	1.91314	tumor up vs normal
NM_181706 // DNAJC24 // DnaJ (Hsp40) homolog, subfamily C, member 24 // 11p13 //	DNAJC24	NM_181706	-1.8248	tumor down vs normal
NM_032452 // JPH4 // junctophilin 4 // 14q11 // 84502 /// NM_001146028 // JPH4 /	JPH4	NM_032452	1.63869	tumor up vs normal
NM_030813 // CLPB // ClpB caseinolytic peptidase B homolog (E. coli) // 11q13.4	CLPB	NM_030813	1.55827	tumor up vs normal
NM_001040624 // NCALD // neurocalcin delta // 8q22.2 // 83988 /// NM_001040628 /	NCALD	NM_001040624	1.89224	tumor up vs normal
NM_194255 // SLC19A1 // solute carrier family 19 (folate transporter), member 1	SLC19A1	NM_194255	1.67503	tumor up vs normal
NM_001042548 // FEZ2 // fasciculation and elongation protein zeta 2 (zygin II) /	FEZ2	NM_001042548	-1.58682	tumor down vs normal
NM_012458 // TIMM13 // translocase of inner mitochondrial membrane 13 homolog (y	TIMM13	NM_012458	2.27658	tumor up vs normal
NM_024310 // PLEKHF1 // pleckstrin homology domain containing, family F (with FY	PLEKHF1	NM_024310	1.79306	tumor up vs normal
NM_017827 // SARS2 // seryl-tRNA synthetase 2, mitochondrial // 19q13.2 // 54938	SARS2	NM_017827	1.56593	tumor up vs normal
NM_012127 // CIZ1 // CDKN1A interacting zinc finger protein 1 // 9q34.1 // 25792	CIZ1	NM_012127	1.70454	tumor up vs normal
NM_080424 // SP110 // SP110 nuclear body protein // 2q37.1 // 3431 /// NM_004509	SP110	NM_080424	-1.67138	tumor down vs normal
NM_001569 // IRAK1 // interleukin-1 receptor-associated kinase 1 // Xq28 // 3654	IRAK1	NM_001569	1.7632	tumor up vs normal
NM_152455 // ZSCAN29 // zinc finger and SCAN domain containing 29 // 15q15.3 //	ZSCAN29	NM_152455	1.58036	tumor up vs normal
NM_003076 // SMARCD1 // SWI/SNF related, matrix associated, actin dependent regu	SMARCD1	NM_003076	1.58736	tumor up vs normal
NM_016366 // CABP2 // calcium binding protein 2 // 11q13.1 // 51475 /// NM_03120	CABP2	NM_016366	1.8894	tumor up vs normal
NM_020156 // C1GALT1 // core 1 synthase, glycoprotein-N-acetylgalactosamine 3-be	C1GALT1	NM_020156	-1.70339	tumor down vs normal
NM_017590 // ZC3H7B // zinc finger CCCH-type containing 7B // 22q13.2 // 23264 /	ZC3H7B	NM_017590	1.82269	tumor up vs normal
NM_001122823 // GTF3C5 // general transcription factor IIIC, polypeptide 5, 63kD	GTF3C5	NM_001122823	1.6589	tumor up vs normal
NM_001722 // POLR3D // polymerase (RNA) III (DNA directed) polypeptide D, 44kDa	POLR3D	NM_001722	-1.57181	tumor down vs normal
NM_020896 // OSBPL5 // oxysterol binding protein-like 5 // 11p15.4 // 114879 ///	OSBPL5	NM_020896	1.59296	tumor up vs normal
NM_032271 // TRAF7 // TNF receptor-associated factor 7 // 16p13.3 // 84231 /// N	TRAF7	NM_032271	1.6744	tumor up vs normal
NM_006244 // PPP2R5B // protein phosphatase 2, regulatory subunit B', beta // 11	PPP2R5B	NM_006244	1.55975	tumor up vs normal
NM_014398 // LAMP3 // lysosomal-associated membrane protein 3 // 3q26.3-q27 // 2	LAMP3	NM_014398	-1.70019	tumor down vs normal
NM_002741 // PKN1 // protein kinase N1 // 19p13.12 // 5585 /// NM_213560 // PKN1	PKN1	NM_002741	1.951	tumor up vs normal
NM_007255 // B4GALT7 // xylosylprotein beta 1,4-galactosyltransferase, polypepti	B4GALT7	NM_007255	1.68063	tumor up vs normal
NM_024939 // ESRP2 // epithelial splicing regulatory protein 2 // 16q22.1 // 800	ESRP2	NM_024939	1.85578	tumor up vs normal
NM_058243 // BRD4 // bromodomain containing 4 // 19p13.1 // 23476 /// NM_014299	BRD4	NM_058243	-1.74178	tumor down vs normal
NM_016418 // NF2 // neurofibromin 2 (merlin) // 22q12.2 // 4771 /// NM_181832 //	NF2	NM_016418	1.6521	tumor up vs normal
NM_003263 // TLR1 // toll-like receptor 1 // 4p14 // 7096 /// ENST00000308979 //	TLR1	NM_003263	-1.91037	tumor down vs normal
NM_133460 // ZNF418 // zinc finger protein 418 // 19q13.43 // 147686 /// ENST000	ZNF418	NM_133460	1.70764	tumor up vs normal
NM_004092 // ECHS1 // enoyl CoA hydratase, short chain, 1, mitochondrial // 10q2	ECHS1	NM_004092	1.98985	tumor up vs normal
NM_019088 // PAF1 // Paf1, RNA polymerase II associated factor, homolog (S. cere	PAF1	NM_019088	1.85709	tumor up vs normal
NM_007045 // FGFR1OP // FGFR1 oncogene partner // 6q27 // 11116 /// NM_194429 //	FGFR1OP	NM_007045	-1.61862	tumor down vs normal
NM_144498 // OSBPL2 // oxysterol binding protein-like 2 // 20q13.3 // 9885 /// N	OSBPL2	NM_144498	1.89286	tumor up vs normal
NM_207103 // C17orf87 // chromosome 17 open reading frame 87 // 17p13.2 // 38832	C17orf87	NM_207103	-2.15818	tumor down vs normal
NM_013352 // DSE // dermatan sulfate epimerase // 6q22 // 29940 /// NM_001080976	DSE	NM_013352	-1.74325	tumor down vs normal
NM_018126 // TMEM33 // transmembrane protein 33 // 4p13 // 55161 /// NM_00102995	TMEM33	NM_018126	-1.95327	tumor down vs normal
NM_145270 // C16orf11 // chromosome 16 open reading frame 11 // 16p13.3 // 14632	C16orf11	NM_145270	1.62708	tumor up vs normal
NM_012203 // GRHPR // glyoxylate reductase/hydroxypyruvate reductase // 9q12 //	GRHPR	NM_012203	1.97789	tumor up vs normal
NM_175884 // FLJ36031 // hypothetical protein FLJ36031 // 7q22.3 // 168455	FLJ36031	NM_175884	-1.63677	tumor down vs normal
NM_024928 // OBFC1 // oligonucleotide/oligosaccharide-binding fold containing 1	OBFC1	NM_024928	1.64109	tumor up vs normal
NM_004673 // ANGPTL1 // angiopoietin-like 1 // 1q25.2 // 9068 /// ENST0000023481	ANGPTL1	NM_004673	-1.76354	tumor down vs normal
NM_153717 // EVC // Ellis van Creveld syndrome // 4p16 // 2121 /// ENST000003826	EVC	NM_153717	-1.74254	tumor down vs normal
NM_020713 // ZNF512B // zinc finger protein 512B // 20q13.33 // 57473 /// ENST00	ZNF512B	NM_020713	1.63239	tumor up vs normal
NM_144977 // DENND1B // DENN/MADD domain containing 1B // 1q31.3 // 163486 /// N	DENND1B	NM_144977	-1.71944	tumor down vs normal
NM_033158 // HYAL2 // hyaluronoglucosaminidase 2 // 3p21.3 // 8692 /// NM_003773	HYAL2	NM_033158	1.66824	tumor up vs normal
NM_006216 // SERPINE2 // serpin peptidase inhibitor, clade E (nexin, plasminogen	SERPINE2	NM_006216	-1.80116	tumor down vs normal
NR_033348 // RAI2 // retinoic acid induced 2 // Xp22 // 10742 /// NR_033349 // R	RAI2	NR_033348	1.69029	tumor up vs normal
NM_016936 // UBN1 // ubinuclein 1 // 16p13.3 // 29855 /// NM_001079514 // UBN1 /	UBN1	NM_016936	1.58049	tumor up vs normal
NM_002570 // PCSK6 // proprotein convertase subtilisin/kexin type 6 // 15q26.3 /	PCSK6	NM_002570	1.70156	tumor up vs normal
NM_020169 // LXN // latexin // 3q25.32 // 56925 /// ENST00000264265 // LXN // la	LXN	NM_020169	-2.15053	tumor down vs normal
NM_004665 // VNN2 // vanin 2 // 6q23-q24 // 8875 /// NM_078488 // VNN2 // vanin	VNN2	NM_004665	-1.87632	tumor down vs normal
NM_002689 // POLA2 // polymerase (DNA directed), alpha 2 (70kD subunit) // 11q13	POLA2	NM_002689	1.53005	tumor up vs normal
NM_004649 // C21orf33 // chromosome 21 open reading frame 33 // 21q22.3 // 8209	C21orf33	NM_004649	2.02234	tumor up vs normal
NM_024698 // SLC25A22 // solute carrier family 25 (mitochondrial carrier: glutam	SLC25A22	NM_024698	1.60353	tumor up vs normal
NM_001098426 // SMARCD2 // SWI/SNF related, matrix associated, actin dependent r	SMARCD2	NM_001098426	1.69849	tumor up vs normal
NM_005234 // NR2F6 // nuclear receptor subfamily 2, group F, member 6 // 19p13.1	NR2F6	NM_005234	1.80055	tumor up vs normal
NM_001044385 // ALS2CR4 // amyotrophic lateral sclerosis 2 (juvenile) chromosome	ALS2CR4	NM_001044385	-1.63411	tumor down vs normal
NM_182476 // COQ6 // coenzyme Q6 homolog, monooxygenase (S. cerevisiae) // 14q24	COQ6	NM_182476	1.78496	tumor up vs normal
NM_145039 // CENPBD1 // CENPB DNA-binding domains containing 1 // 16q24.3 // 928	CENPBD1	NM_145039	1.6053	tumor up vs normal
NM_004291 // CARTPT // CART prepropeptide // 5q13.2 // 9607 /// ENST00000296777	CARTPT	NM_004291	-2.30164	tumor down vs normal
BC032451 // IGK@ // immunoglobulin kappa locus // 2p12 // 50802 /// BC016380 //	IGK@	BC032451	-2.54502	tumor down vs normal
NM_001136566 // RAD21L1 // RAD21-like 1 (S. pombe) // 20p13 // 642636 /// NM_014	RAD21L1	NM_001136566	1.73418	tumor up vs normal
NM_206963 // RARRES1 // retinoic acid receptor responder (tazarotene induced) 1	RARRES1	NM_206963	-2.09282	tumor down vs normal
NM_005710 // PQBP1 // polyglutamine binding protein 1 // Xp11.23 // 10084 /// NM	PQBP1	NM_005710	1.90568	tumor up vs normal
NM_017720 // STAP2 // signal transducing adaptor family member 2 // 19p13.3 // 5	STAP2	NM_017720	1.90172	tumor up vs normal
NM_000053 // ATP7B // ATPase, Cu++ transporting, beta polypeptide // 13q14.3 //	ATP7B	NM_000053	1.59083	tumor up vs normal
NM_001077494 // NFKB2 // nuclear factor of kappa light polypeptide gene enhancer	NFKB2	NM_001077494	1.6231	tumor up vs normal
NM_001114636 // FANCL // Fanconi anemia, complementation group L // 2p16.1 // 55	FANCL	NM_001114636	-1.79917	tumor down vs normal
NM_000814 // GABRB3 // gamma-aminobutyric acid (GABA) A receptor, beta 3 // 15q1	GABRB3	NM_000814	1.85692	tumor up vs normal
NM_001452 // FOXF2 // forkhead box F2 // 6p25.3 // 2295 /// NM_001451 // FOXF1 /	FOXF2	NM_001452	-1.64095	tumor down vs normal
NM_015299 // KHNYN // KH and NYN domain containing // 14q12 // 23351 /// NM_0201	KHNYN	NM_015299	1.71809	tumor up vs normal
NM_153183 // NUDT10 // nudix (nucleoside diphosphate linked moiety X)-type motif	NUDT10	NM_153183	-1.8444	tumor down vs normal
NM_018992 // KCTD5 // potassium channel tetramerisation domain containing 5 // 1	KCTD5	NM_018992	1.63107	tumor up vs normal
NM_005619 // RTN2 // reticulon 2 // 19q13.32 // 6253 /// NM_206900 // RTN2 // re	RTN2	NM_005619	1.62147	tumor up vs normal
NM_001172663 // RAB40C // RAB40C, member RAS oncogene family // 16p13.3 // 57799	RAB40C	NM_001172663	1.79157	tumor up vs normal
NM_016297 // PCYOX1 // prenylcysteine oxidase 1 // 2p13.3 // 51449 /// ENST00000	PCYOX1	NM_016297	-2.06193	tumor down vs normal
NM_022727 // TRMT2A // TRM2 tRNA methyltransferase 2 homolog A (S. cerevisiae) /	TRMT2A	NM_022727	1.60898	tumor up vs normal
NM_001166686 // PFKM // phosphofructokinase, muscle // 12q13.3 // 5213 /// NM_00	PFKM	NM_001166686	1.7646	tumor up vs normal
NM_002182 // IL1RAP // interleukin 1 receptor accessory protein // 3q28 // 3556	IL1RAP	NM_002182	-1.66915	tumor down vs normal
NM_005746 // NAMPT // nicotinamide phosphoribosyltransferase // 7q22.3 // 10135	NAMPT	NM_005746	-2.42665	tumor down vs normal
NM_014406 // CCT8L2 // chaperonin containing TCP1, subunit 8 (theta)-like 2 // 2	CCT8L2	NM_014406	1.99496	tumor up vs normal
---		---	1.93029	tumor up vs normal
NR_026588 // EFCAB2 // EF-hand calcium binding domain 2 // 1q44 // 84288 /// NM_	EFCAB2	NR_026588	-1.77512	tumor down vs normal
NM_024576 // OGFRL1 // opioid growth factor receptor-like 1 // 6q13 // 79627 ///	OGFRL1	NM_024576	-1.73667	tumor down vs normal
NM_033418 // C1orf156 // chromosome 1 open reading frame 156 // 1q24.2 // 92342	C1orf156	NM_033418	-1.75556	tumor down vs normal
NM_004867 // ITM2A // integral membrane protein 2A // Xq13.3-Xq21.2 // 9452 ///	ITM2A	NM_004867	-1.87559	tumor down vs normal
NM_001042413 // GLIS3 // GLIS family zinc finger 3 // 9p24.2 // 169792 /// NM_15	GLIS3	NM_001042413	-1.71137	tumor down vs normal
NM_198477 // CXCL17 // chemokine (C-X-C motif) ligand 17 // 19q13.2 // 284340 //	CXCL17	NM_198477	-2.35143	tumor down vs normal
NM_001051 // SSTR3 // somatostatin receptor 3 // 22q13.1 // 6753 /// ENST0000032	SSTR3	NM_001051	1.77264	tumor up vs normal
NM_012453 // TBL2 // transducin (beta)-like 2 // 7q11.23 // 26608 /// ENST000003	TBL2	NM_012453	1.64724	tumor up vs normal
NM_021117 // CRY2 // cryptochrome 2 (photolyase-like) // 11p11.2 // 1408 /// NM_	CRY2	NM_021117	1.58102	tumor up vs normal
NM_014008 // CCDC22 // coiled-coil domain containing 22 // Xp11.23 // 28952 ///	CCDC22	NM_014008	1.64214	tumor up vs normal
NM_031220 // PITPNM3 // PITPNM family member 3 // 17p13 // 83394 /// NM_00116596	PITPNM3	NM_031220	1.5156	tumor up vs normal
NM_021143 // ZNF20 // zinc finger protein 20 // 19p13.2 // 7568 /// ENST00000334	ZNF20	NM_021143	1.60902	tumor up vs normal
NM_080732 // EGLN2 // egl nine homolog 2 (C. elegans) // 19q13.2 // 112398 /// N	EGLN2	NM_080732	1.60632	tumor up vs normal
NM_001013398 // IGFBP3 // insulin-like growth factor binding protein 3 // 7p13-p	IGFBP3	NM_001013398	-1.8719	tumor down vs normal
NM_001003799 // TARP // TCR gamma alternate reading frame protein // 7p15-p14 //	TARP	NM_001003799	2.71212	tumor up vs normal
NM_001629 // ALOX5AP // arachidonate 5-lipoxygenase-activating protein // 13q12	ALOX5AP	NM_001629	-2.2014	tumor down vs normal
AK024408 // MZT2B // mitotic spindle organizing protein 2B // 2q21.1 // 80097	MZT2B	AK024408	1.99188	tumor up vs normal
NM_020443 // NAV1 // neuron navigator 1 // 1q32.3 // 89796 /// NM_001167738 // N	NAV1	NM_020443	-1.60691	tumor down vs normal
NM_014800 // ELMO1 // engulfment and cell motility 1 // 7p14.1 // 9844 /// NM_00	ELMO1	NM_014800	-1.68665	tumor down vs normal
NM_006361 // HOXB13 // homeobox B13 // 17q21.2 // 10481 /// ENST00000290295 // H	HOXB13	NM_006361	2.13738	tumor up vs normal
NM_006100 // ST3GAL6 // ST3 beta-galactoside alpha-2,3-sialyltransferase 6 // 3q	ST3GAL6	NM_006100	-1.64643	tumor down vs normal
NM_002089 // CXCL2 // chemokine (C-X-C motif) ligand 2 // 4q21 // 2920 /// ENST0	CXCL2	NM_002089	-1.81189	tumor down vs normal
NM_152299 // NCAPH2 // non-SMC condensin II complex, subunit H2 // 22q13.33 // 2	NCAPH2	NM_152299	1.56019	tumor up vs normal
NM_000064 // C3 // complement component 3 // 19p13.3-p13.2 // 718 /// ENST000002	C3	NM_000064	-2.41608	tumor down vs normal
NM_005211 // CSF1R // colony stimulating factor 1 receptor // 5q32 // 1436 /// E	CSF1R	NM_005211	-1.68553	tumor down vs normal
NM_005426 // TP53BP2 // tumor protein p53 binding protein, 2 // 1q42.1 // 7159 /	TP53BP2	NM_005426	-1.68022	tumor down vs normal
NM_024894 // NOL10 // nucleolar protein 10 // 2p25.1 // 79954 /// ENST0000038168	NOL10	NM_024894	-1.65761	tumor down vs normal
NM_014165 // NDUFAF4 // NADH dehydrogenase (ubiquinone) 1 alpha subcomplex, asse	NDUFAF4	NM_014165	-1.91071	tumor down vs normal
NM_001008397 // GPX8 // glutathione peroxidase 8 (putative) // 5q11.2 // 493869	GPX8	NM_001008397	-1.93736	tumor down vs normal
NM_020657 // ZNF304 // zinc finger protein 304 // 19q13.4 // 57343 /// ENST00000	ZNF304	NM_020657	1.69876	tumor up vs normal
NM_032752 // ZNF496 // zinc finger protein 496 // 1q44 // 84838 /// ENST00000294	ZNF496	NM_032752	1.60101	tumor up vs normal
NM_001369 // DNAH5 // dynein, axonemal, heavy chain 5 // 5p15.2 // 1767 /// ENST	DNAH5	NM_001369	2.05267	tumor up vs normal
NM_006247 // PPP5C // protein phosphatase 5, catalytic subunit // 19q13.3 // 553	PPP5C	NM_006247	1.65675	tumor up vs normal
BC001407 // SLC25A16 // solute carrier family 25 (mitochondrial carrier; Graves	SLC25A16	BC001407	1.71552	tumor up vs normal
NM_006734 // HIVEP2 // human immunodeficiency virus type I enhancer binding prot	HIVEP2	NM_006734	-1.69639	tumor down vs normal
NM_153450 // MED19 // mediator complex subunit 19 // 11q12.1 // 219541 /// ENST0	MED19	NM_153450	1.55088	tumor up vs normal
NM_024667 // VPS37B // vacuolar protein sorting 37 homolog B (S. cerevisiae) //	VPS37B	NM_024667	1.61882	tumor up vs normal
NM_175066 // DDX51 // DEAD (Asp-Glu-Ala-Asp) box polypeptide 51 // 12q24.33 // 3	DDX51	NM_175066	1.63818	tumor up vs normal
NM_001136113 // POMT1 // protein-O-mannosyltransferase 1 // 9q34.1 // 10585 ///	POMT1	NM_001136113	1.61165	tumor up vs normal
NM_007346 // OGFR // opioid growth factor receptor // 20q13.3 // 11054 /// ENST0	OGFR	NM_007346	1.78401	tumor up vs normal
NM_000186 // CFH // complement factor H // 1q32 // 3075 /// NM_001014975 // CFH	CFH	NM_000186	-2.01523	tumor down vs normal
NM_016209 // TRAPPC2L // trafficking protein particle complex 2-like // 16q24.3	TRAPPC2L	NM_016209	1.79358	tumor up vs normal
NM_002350 // LYN // v-yes-1 Yamaguchi sarcoma viral related oncogene homolog //	LYN	NM_002350	-1.66293	tumor down vs normal
NM_199421 // SOCS4 // suppressor of cytokine signaling 4 // 14q22.1 // 122809 //	SOCS4	NM_199421	-1.65872	tumor down vs normal
NM_004337 // OSGIN2 // oxidative stress induced growth inhibitor family member 2	OSGIN2	NM_004337	-1.59513	tumor down vs normal
NM_001669 // ARSD // arylsulfatase D // Xp22.3 // 414 /// NM_009589 // ARSD // a	ARSD	NM_001669	1.92989	tumor up vs normal
NM_014793 // LCMT2 // leucine carboxyl methyltransferase 2 // 15q15.3 // 9836 //	LCMT2	NM_014793	1.63246	tumor up vs normal
NM_000222 // KIT // v-kit Hardy-Zuckerman 4 feline sarcoma viral oncogene homolo	KIT	NM_000222	-1.91967	tumor down vs normal
NM_021727 // FADS3 // fatty acid desaturase 3 // 11q12-q13.1 // 3995 /// ENST000	FADS3	NM_021727	1.6382	tumor up vs normal
NR_036550 // PES1 // pescadillo homolog 1, containing BRCT domain (zebrafish) //	PES1	NR_036550	1.73018	tumor up vs normal
NM_017817 // RAB20 // RAB20, member RAS oncogene family // 13q34 // 55647 /// EN	RAB20	NM_017817	1.59184	tumor up vs normal
NM_138393 // REEP6 // receptor accessory protein 6 // 19p13.3 // 92840 /// ENST0	REEP6	NM_138393	1.9581	tumor up vs normal
NR_024466 // LSM5 // LSM5 homolog, U6 small nuclear RNA associated (S. cerevisia	LSM5	NR_024466	-2.00199	tumor down vs normal
NM_016240 // SCARA3 // scavenger receptor class A, member 3 // 8p21 // 51435 ///	SCARA3	NM_016240	-1.69732	tumor down vs normal
NM_015646 // RAP1B // RAP1B, member of RAS oncogene family // 12q14 // 5908 ///	RAP1B	NM_015646	2.55062	tumor up vs normal
NM_001017915 // INPP5D // inositol polyphosphate-5-phosphatase, 145kDa // 2q37.1	INPP5D	NM_001017915	-1.6823	tumor down vs normal
NM_000687 // AHCY // adenosylhomocysteinase // 20cen-q13.1 // 191 /// NM_0011617	AHCY	NM_000687	2.00834	tumor up vs normal
NM_014452 // TNFRSF21 // tumor necrosis factor receptor superfamily, member 21 /	TNFRSF21	NM_014452	-1.65581	tumor down vs normal
NM_001185058 // NOL3 // nucleolar protein 3 (apoptosis repressor with CARD domai	NOL3	NM_001185058	1.69677	tumor up vs normal
NM_080823 // SRMS // src-related kinase lacking C-terminal regulatory tyrosine a	SRMS	NM_080823	1.58669	tumor up vs normal
NM_013328 // PYCR2 // pyrroline-5-carboxylate reductase family, member 2 // 1q42	PYCR2	NM_013328	1.69974	tumor up vs normal
NM_080607 // VSTM2L // V-set and transmembrane domain containing 2 like // 20q11	VSTM2L	NM_080607	1.75258	tumor up vs normal
NM_207352 // CYP4V2 // cytochrome P450, family 4, subfamily V, polypeptide 2 //	CYP4V2	NM_207352	-1.70243	tumor down vs normal
NM_032717 // AGPAT9 // 1-acylglycerol-3-phosphate O-acyltransferase 9 // 4q21.23	AGPAT9	NM_032717	-1.6392	tumor down vs normal
NM_025113 // C13orf18 // chromosome 13 open reading frame 18 // 13q14.13 // 8018	C13orf18	NM_025113	-1.60285	tumor down vs normal
NM_018081 // WRAP53 // WD repeat containing, antisense to TP53 // 17p13.1 // 551	WRAP53	NM_018081	1.59538	tumor up vs normal
NM_024040 // CUEDC2 // CUE domain containing 2 // 10q24.32 // 79004 /// ENST0000	CUEDC2	NM_024040	1.81245	tumor up vs normal
NM_017518 // HAUS7 // HAUS augmin-like complex, subunit 7 // Xq28 // 55559 /// N	HAUS7	NM_017518	1.54008	tumor up vs normal
NM_020861 // ZBTB2 // zinc finger and BTB domain containing 2 // 6q25.1 // 57621	ZBTB2	NM_020861	-1.64777	tumor down vs normal
NM_000189 // HK2 // hexokinase 2 // 2p13 // 3099 /// ENST00000290573 // HK2 // h	HK2	NM_000189	-1.60216	tumor down vs normal
NM_001042498 // SLC35A2 // solute carrier family 35 (UDP-galactose transporter),	SLC35A2	NM_001042498	1.6435	tumor up vs normal
NM_000166 // GJB1 // gap junction protein, beta 1, 32kDa // Xq13.1 // 2705 /// N	GJB1	NM_000166	2.10713	tumor up vs normal
NM_012096 // APPL1 // adaptor protein, phosphotyrosine interaction, PH domain an	APPL1	NM_012096	-1.74796	tumor down vs normal
NR_031766 // TESC // tescalcin // 12q24.22 // 54997 /// NM_017899 // TESC // tes	TESC	NR_031766	2.02775	tumor up vs normal
NM_000436 // OXCT1 // 3-oxoacid CoA transferase 1 // 5p13.1 // 5019 /// ENST0000	OXCT1	NM_000436	-1.72252	tumor down vs normal
NM_006522 // WNT6 // wingless-type MMTV integration site family, member 6 // 2q3	WNT6	NM_006522	-1.6345	tumor down vs normal
NM_014338 // PISD // phosphatidylserine decarboxylase // 22q12.2 // 23761 /// EN	PISD	NM_014338	1.58386	tumor up vs normal
NM_005184 // CALM3 // calmodulin 3 (phosphorylase kinase, delta) // 19q13.2-q13.	CALM3	NM_005184	1.77346	tumor up vs normal
NM_014795 // ZEB2 // zinc finger E-box binding homeobox 2 // 2q22.3 // 9839 ///	ZEB2	NM_014795	-1.92081	tumor down vs normal
NM_138769 // RHOT2 // ras homolog gene family, member T2 // 16p13.3 // 89941 ///	RHOT2	NM_138769	1.65157	tumor up vs normal
NR_034069 // SRPK1 // SRSF protein kinase 1 // 6p21.31 // 6732 /// NM_003137 //	SRPK1	NR_034069	-1.72698	tumor down vs normal
NM_144596 // TTC8 // tetratricopeptide repeat domain 8 // 14q31.3 // 123016 ///	TTC8	NM_144596	1.65774	tumor up vs normal
NM_153332 // ERI1 // exoribonuclease 1 // 8p23.1 // 90459 /// ENST00000250263 //	ERI1	NM_153332	-1.63068	tumor down vs normal
NM_001160094 // ACOT13 // acyl-CoA thioesterase 13 // 6p22.3 // 55856 /// NM_018	ACOT13	NM_001160094	-1.7715	tumor down vs normal
NM_001894 // CSNK1E // casein kinase 1, epsilon // 22q13.1 // 1454 /// NM_152221	CSNK1E	NM_001894	1.77821	tumor up vs normal
NM_004517 // ILK // integrin-linked kinase // 11p15.4 // 3611 /// NM_001014795 /	ILK	NM_004517	1.79899	tumor up vs normal
NM_032546 // TRIM54 // tripartite motif-containing 54 // 2p23.3 // 57159 /// NM_	TRIM54	NM_032546	1.56845	tumor up vs normal
NM_001014283 // DCUN1D2 // DCN1, defective in cullin neddylation 1, domain conta	DCUN1D2	NM_001014283	1.56335	tumor up vs normal
NM_009586 // SIM2 // single-minded homolog 2 (Drosophila) // 21q22.2|21q22.13 //	SIM2	NM_009586	1.90386	tumor up vs normal
NM_001040185 // ZNF765 // zinc finger protein 765 // 19q13.42 // 91661 /// NM_00	ZNF765	NM_001040185	2.04926	tumor up vs normal
NM_016246 // HSD17B14 // hydroxysteroid (17-beta) dehydrogenase 14 // 19q13.33 /	HSD17B14	NM_016246	2.13444	tumor up vs normal
NM_032320 // BTBD10 // BTB (POZ) domain containing 10 // 11p15.2 // 84280 /// EN	BTBD10	NM_032320	-1.80174	tumor down vs normal
NM_005861 // STUB1 // STIP1 homology and U-box containing protein 1, E3 ubiquiti	STUB1	NM_005861	1.91457	tumor up vs normal
NM_021138 // TRAF2 // TNF receptor-associated factor 2 // 9q34 // 7186 /// ENST0	TRAF2	NM_021138	1.54913	tumor up vs normal
NM_133636 // HELQ // helicase, POLQ-like // 4q21.23 // 113510 /// ENST0000029548	HELQ	NM_133636	-1.52348	tumor down vs normal
NM_014946 // SPAST // spastin // 2p24-p21 // 6683 /// NM_199436 // SPAST // spas	SPAST	NM_014946	-1.64609	tumor down vs normal
NM_173545 // APLF // aprataxin and PNKP like factor // 2p13.3 // 200558 /// NM_0	APLF	NM_173545	-1.74215	tumor down vs normal
NM_000206 // IL2RG // interleukin 2 receptor, gamma // Xq13.1 // 3561 /// NM_001	IL2RG	NM_000206	-1.81688	tumor down vs normal
NM_004881 // TP53I3 // tumor protein p53 inducible protein 3 // 2p23.3 // 9540 /	TP53I3	NM_004881	1.78237	tumor up vs normal
NM_152546 // SRFBP1 // serum response factor binding protein 1 // 5q23.1 // 1534	SRFBP1	NM_152546	-1.73174	tumor down vs normal
NM_024101 // MLPH // melanophilin // 2q37.3 // 79083 /// NM_001042467 // MLPH //	MLPH	NM_024101	1.82732	tumor up vs normal
NM_006622 // PLK2 // polo-like kinase 2 // 5q12.1-q13.2 // 10769 /// ENST0000027	PLK2	NM_006622	-1.69655	tumor down vs normal
NM_004579 // MAP4K2 // mitogen-activated protein kinase kinase kinase kinase 2 /	MAP4K2	NM_004579	1.56247	tumor up vs normal
NM_015913 // TXNDC12 // thioredoxin domain containing 12 (endoplasmic reticulum)	TXNDC12	NM_015913	-1.90676	tumor down vs normal
NM_001002914 // KCTD11 // potassium channel tetramerisation domain containing 11	KCTD11	NM_001002914	1.90446	tumor up vs normal
NM_013306 // SNX15 // sorting nexin 15 // 11q12 // 29907 /// NM_147777 // SNX15	SNX15	NM_013306	1.69704	tumor up vs normal
NM_001258 // CDK3 // cyclin-dependent kinase 3 // 17q22-qter // 1018 /// ENST000	CDK3	NM_001258	1.64045	tumor up vs normal
NM_033644 // FBXW11 // F-box and WD repeat domain containing 11 // 5q35.1 // 232	FBXW11	NM_033644	-1.68377	tumor down vs normal
NM_001198 // PRDM1 // PR domain containing 1, with ZNF domain // 6q21 // 639 ///	PRDM1	NM_001198	-1.69413	tumor down vs normal
NM_001009921 // VPS8 // vacuolar protein sorting 8 homolog (S. cerevisiae) // 3q	VPS8	NM_001009921	-1.61678	tumor down vs normal
NM_001511 // CXCL1 // chemokine (C-X-C motif) ligand 1 (melanoma growth stimulat	CXCL1	NM_001511	-2.33817	tumor down vs normal
NM_017704 // ANKRD49 // ankyrin repeat domain 49 // 11q21 // 54851 /// ENST00000	ANKRD49	NM_017704	-1.95712	tumor down vs normal
NM_020695 // REXO1 // REX1, RNA exonuclease 1 homolog (S. cerevisiae) // 19p13.3	REXO1	NM_020695	1.54518	tumor up vs normal
NM_001024943 // ASL // argininosuccinate lyase // 7cen-q11.2 // 435 /// NM_00004	ASL	NM_001024943	1.65827	tumor up vs normal
NM_032813 // TMTC4 // transmembrane and tetratricopeptide repeat containing 4 //	TMTC4	NM_032813	2.02955	tumor up vs normal
NM_002648 // PIM1 // pim-1 oncogene // 6p21.2 // 5292 /// ENST00000373509 // PIM	PIM1	NM_002648	-1.58984	tumor down vs normal
NM_001383 // DPH1 // DPH1 homolog (S. cerevisiae) // 17p13.3 // 1801 /// NM_0808	DPH1	NM_001383	1.7677	tumor up vs normal
NM_025082 // CENPT // centromere protein T // 16q22.1 // 80152 /// ENST000004408	CENPT	NM_025082	1.62492	tumor up vs normal
NM_001142459 // ASB10 // ankyrin repeat and SOCS box-containing 10 // 7q36.1 //	ASB10	NM_001142459	-1.63272	tumor down vs normal
NM_000507 // FBP1 // fructose-1,6-bisphosphatase 1 // 9q22.3 // 2203 /// NM_0011	FBP1	NM_000507	2.19335	tumor up vs normal
NM_016619 // PLAC8 // placenta-specific 8 // 4q21.22 // 51316 /// NM_001130715 /	PLAC8	NM_016619	-2.02835	tumor down vs normal
NM_002676 // PMM1 // phosphomannomutase 1 // 22q13.2 // 5372 /// ENST00000216259	PMM1	NM_002676	1.76569	tumor up vs normal
NM_000666 // ACY1 // aminoacylase 1 // 3p21.1 // 95 /// L07548 // ACY1 // aminoa	ACY1	NM_000666	1.79658	tumor up vs normal
NM_006006 // ZBTB16 // zinc finger and BTB domain containing 16 // 11q23.1 // 77	ZBTB16	NM_006006	1.78528	tumor up vs normal
NM_017576 // KIF27 // kinesin family member 27 // 9q21.32 // 55582 /// ENST00000	KIF27	NM_017576	1.73853	tumor up vs normal
NM_012307 // EPB41L3 // erythrocyte membrane protein band 4.1-like 3 // 18p11.32	EPB41L3	NM_012307	-1.67034	tumor down vs normal
NM_175872 // ZNF792 // zinc finger protein 792 // 19q13.11 // 126375 /// ENST000	ZNF792	NM_175872	1.66767	tumor up vs normal
NR_024108 // PFKL // phosphofructokinase, liver // 21q22.3 // 5211 /// NM_002626	PFKL	NR_024108	1.7508	tumor up vs normal
NM_001398 // ECH1 // enoyl CoA hydratase 1, peroxisomal // 19q13.1 // 1891 /// E	ECH1	NM_001398	1.9958	tumor up vs normal
NM_002982 // CCL2 // chemokine (C-C motif) ligand 2 // 17q11.2-q12 // 6347 /// E	CCL2	NM_002982	-2.78316	tumor down vs normal
NM_004317 // ASNA1 // arsA arsenite transporter, ATP-binding, homolog 1 (bacteri	ASNA1	NM_004317	1.95756	tumor up vs normal
NM_022835 // PLEKHG2 // pleckstrin homology domain containing, family G (with Rh	PLEKHG2	NM_022835	1.53695	tumor up vs normal
NM_005059 // RLN2 // relaxin 2 // 9p24.1 // 6019 /// NM_134441 // RLN2 // relaxi	RLN2	NM_005059	-2.00588	tumor down vs normal
NM_152384 // BBS5 // Bardet-Biedl syndrome 5 // 2q31.1 // 129880 /// ENST0000029	BBS5	NM_152384	-1.64672	tumor down vs normal
NM_032790 // ORAI1 // ORAI calcium release-activated calcium modulator 1 // 12q2	ORAI1	NM_032790	1.60412	tumor up vs normal
NM_006676 // USP20 // ubiquitin specific peptidase 20 // 9q34.11 // 10868 /// NM	USP20	NM_006676	1.62471	tumor up vs normal
NM_018293 // ZNF654 // zinc finger protein 654 // 3p11.1 // 55279 /// ENST000003	ZNF654	NM_018293	-1.85819	tumor down vs normal
NM_020433 // JPH2 // junctophilin 2 // 20q13.12 // 57158 /// NM_175913 // JPH2 /	JPH2	NM_020433	1.57072	tumor up vs normal
NM_022129 // PBLD // phenazine biosynthesis-like protein domain containing // 10	PBLD	NM_022129	1.82666	tumor up vs normal
NM_005628 // SLC1A5 // solute carrier family 1 (neutral amino acid transporter),	SLC1A5	NM_005628	1.78741	tumor up vs normal
NM_001177506 // AOAH // acyloxyacyl hydrolase (neutrophil) // 7p14-p12 // 313 //	AOAH	NM_001177506	-1.87289	tumor down vs normal
NM_001161344 // CHFR // checkpoint with forkhead and ring finger domains // 12q2	CHFR	NM_001161344	1.61902	tumor up vs normal
NM_014252 // SLC25A15 // solute carrier family 25 (mitochondrial carrier; ornith	SLC25A15	NM_014252	1.66401	tumor up vs normal
NM_012412 // H2AFV // H2A histone family, member V // 7p13 // 94239 /// NM_20151	H2AFV	NM_012412	2.12841	tumor up vs normal
NM_016622 // MRPL35 // mitochondrial ribosomal protein L35 // 2p11.2 // 51318 //	MRPL35	NM_016622	-1.64535	tumor down vs normal
NM_033133 // CNP // 2',3'-cyclic nucleotide 3' phosphodiesterase // 17q21 // 126	CNP	NM_033133	1.76502	tumor up vs normal
NR_028048 // CRAT // carnitine O-acetyltransferase // 9q34.1 // 1384 /// NM_0007	CRAT	NR_028048	1.83002	tumor up vs normal
NM_022917 // NOL6 // nucleolar protein family 6 (RNA-associated) // 9p13.3 // 65	NOL6	NM_022917	1.67779	tumor up vs normal
NM_001166373 // MARCH1 // membrane-associated ring finger (C3HC4) 1 // 4q32.2 //	2012-03-01	NM_001166373	-2.04642	tumor down vs normal
NM_001197 // BIK // BCL2-interacting killer (apoptosis-inducing) // 22q13.31 //	BIK	NM_001197	1.68357	tumor up vs normal
NM_139161 // CRB3 // crumbs homolog 3 (Drosophila) // 19p13.3 // 92359 /// NM_17	CRB3	NM_139161	1.60569	tumor up vs normal
NM_004031 // IRF7 // interferon regulatory factor 7 // 11p15.5 // 3665 /// NM_00	IRF7	NM_004031	1.59354	tumor up vs normal
NM_007199 // IRAK3 // interleukin-1 receptor-associated kinase 3 // 12q14.3 // 1	IRAK3	NM_007199	-1.74688	tumor down vs normal
NM_006769 // LMO4 // LIM domain only 4 // 1p22.3 // 8543 /// ENST00000370544 //	LMO4	NM_006769	-1.81482	tumor down vs normal
NM_012265 // RHBDD3 // rhomboid domain containing 3 // 22q12.2 // 25807 /// ENST	RHBDD3	NM_012265	1.62001	tumor up vs normal
NM_020637 // FGF22 // fibroblast growth factor 22 // 19p13.3 // 27006 /// ENST00	FGF22	NM_020637	1.68812	tumor up vs normal
NM_181710 // ZNRF4 // zinc and ring finger 4 // 19p13.3 // 148066 /// ENST000002	ZNRF4	NM_181710	1.48749	tumor up vs normal
NM_001160170 // NAT1 // N-acetyltransferase 1 (arylamine N-acetyltransferase) //	NAT1	NM_001160170	-1.71485	tumor down vs normal
NM_015974 // CRYL1 // crystallin, lambda 1 // 13q12.11 // 51084 /// ENST00000298	CRYL1	NM_015974	2.18095	tumor up vs normal
NM_014064 // METTL11A // methyltransferase like 11A // 9q34.11 // 28989 /// ENST	METTL11A	NM_014064	1.65018	tumor up vs normal
NM_001080547 // SPI1 // spleen focus forming virus (SFFV) proviral integration o	SPI1	NM_001080547	-1.64991	tumor down vs normal
NM_080616 // C20orf112 // chromosome 20 open reading frame 112 // 20q11.1-q11.23	C20orf112	NM_080616	-1.72628	tumor down vs normal
NM_018999 // FAM190B // family with sequence similarity 190, member B // 10q23.1	FAM190B	NM_018999	-1.81094	tumor down vs normal
NR_002781 // TSPY26P // testis specific protein, Y-linked 26, pseudogene // 20q1	TSPY26P	NR_002781	1.92282	tumor up vs normal
NM_019111 // HLA-DRA // major histocompatibility complex, class II, DR alpha //	HLA-DRA	NM_019111	-2.09374	tumor down vs normal
NM_001810 // CENPB // centromere protein B, 80kDa // 20p13 // 1059 /// ENST00000	CENPB	NM_001810	1.63258	tumor up vs normal
NM_177439 // FTSJ1 // FtsJ homolog 1 (E. coli) // Xp11.23 // 24140 /// NM_012280	FTSJ1	NM_177439	1.66074	tumor up vs normal
NM_181782 // NCOA7 // nuclear receptor coactivator 7 // 6q22.32 // 135112 /// NM	NCOA7	NM_181782	-1.74362	tumor down vs normal
NM_004331 // BNIP3L // BCL2/adenovirus E1B 19kDa interacting protein 3-like // 8	BNIP3L	NM_004331	-1.77066	tumor down vs normal
NM_003249 // THOP1 // thimet oligopeptidase 1 // 19q13.3 // 7064 /// ENST0000030	THOP1	NM_003249	1.80664	tumor up vs normal
NM_012252 // TFEC // transcription factor EC // 7q31.2 // 22797 /// NM_001018058	TFEC	NM_012252	-1.71692	tumor down vs normal
NM_005707 // PDCD7 // programmed cell death 7 // 15q22.31 // 10081 /// ENST00000	PDCD7	NM_005707	1.61854	tumor up vs normal
NM_176871 // PDLIM2 // PDZ and LIM domain 2 (mystique) // 8p21.2 // 64236 /// NM	PDLIM2	NM_176871	-1.57665	tumor down vs normal
NM_001164276 // ZNF44 // zinc finger protein 44 // 19p13.2 // 51710 /// NM_01626	ZNF44	NM_001164276	1.53833	tumor up vs normal
NM_000476 // AK1 // adenylate kinase 1 // 9q34.1 // 203 /// ENST00000373176 // A	AK1	NM_000476	1.81236	tumor up vs normal
NM_015570 // AUTS2 // autism susceptibility candidate 2 // 7q11.22 // 26053 ///	AUTS2	NM_015570	-1.57441	tumor down vs normal
NM_001985 // ETFB // electron-transfer-flavoprotein, beta polypeptide // 19q13.3	ETFB	NM_001985	2.02447	tumor up vs normal
NM_002664 // PLEK // pleckstrin // 2p13.3 // 5341 /// ENST00000234313 // PLEK //	PLEK	NM_002664	-1.87095	tumor down vs normal
NM_016104 // RWDD1 // RWD domain containing 1 // 6q13-q22.33 // 51389 /// NM_001	RWDD1	NM_016104	-2.2871	tumor down vs normal
NM_177559 // CSNK2A1 // casein kinase 2, alpha 1 polypeptide // 20p13 // 1457 //	CSNK2A1	NM_177559	-1.89504	tumor down vs normal
NM_018073 // TRIM68 // tripartite motif-containing 68 // 11p15.4 // 55128 /// EN	TRIM68	NM_018073	2.09888	tumor up vs normal
NM_178858 // SFXN2 // sideroflexin 2 // 10q24.32 // 118980 /// ENST00000369893 /	SFXN2	NM_178858	1.7194	tumor up vs normal
NM_000693 // ALDH1A3 // aldehyde dehydrogenase 1 family, member A3 // 15q26.3 //	ALDH1A3	NM_000693	1.81121	tumor up vs normal
NM_144726 // RNF145 // ring finger protein 145 // 5q33.3 // 153830 /// ENST00000	RNF145	NM_144726	-1.63122	tumor down vs normal
NM_144646 // IGJ // immunoglobulin J polypeptide, linker protein for immunoglobu	IGJ	NM_144646	-3.49306	tumor down vs normal
NM_021982 // SEC24A // SEC24 family, member A (S. cerevisiae) // 5q31.1 // 10802	SEC24A	NM_021982	-1.80783	tumor down vs normal
NM_006763 // BTG2 // BTG family, member 2 // 1q32 // 7832 /// ENST00000290551 //	BTG2	NM_006763	-1.71541	tumor down vs normal
NM_024864 // MRM1 // mitochondrial rRNA methyltransferase 1 homolog (S. cerevisi	MRM1	NM_024864	1.61141	tumor up vs normal
NM_033397 // ITPRIP // inositol 1,4,5-triphosphate receptor interacting protein	ITPRIP	NM_033397	1.53229	tumor up vs normal
NM_032429 // LZTS2 // leucine zipper, putative tumor suppressor 2 // 10q24 // 84	LZTS2	NM_032429	1.64773	tumor up vs normal
NM_173467 // MCAT // malonyl CoA:ACP acyltransferase (mitochondrial) // 22q13.31	MCAT	NM_173467	2.01867	tumor up vs normal
NM_017619 // RNPC3 // RNA-binding region (RNP1, RRM) containing 3 // 1p21 // 555	RNPC3	NM_017619	-1.70729	tumor down vs normal
NM_003783 // B3GALT2 // UDP-Gal:betaGlcNAc beta 1,3-galactosyltransferase, polyp	B3GALT2	NM_003783	-1.93994	tumor down vs normal
NM_017413 // APLN // apelin // Xq25 // 8862 /// ENST00000307484 // APLN // apeli	APLN	NM_017413	1.5685	tumor up vs normal
NM_024790 // CSPP1 // centrosome and spindle pole associated protein 1 // 8q13.2	CSPP1	NM_024790	-1.61595	tumor down vs normal
NM_013376 // SERTAD1 // SERTA domain containing 1 // 19q13.1-q13.2 // 29950 ///	SERTAD1	NM_013376	1.75876	tumor up vs normal
NM_016400 // C15orf63 // chromosome 15 open reading frame 63 // 15q15.3 // 25764	C15orf63	NM_016400	1.60572	tumor up vs normal
NM_004249 // RAB28 // RAB28, member RAS oncogene family // 4p15.33 // 9364 /// N	RAB28	NM_004249	-1.68864	tumor down vs normal
NM_024741 // ZNF408 // zinc finger protein 408 // 11p11.2 // 79797 /// NM_001184	ZNF408	NM_024741	1.55253	tumor up vs normal
NM_001261 // CDK9 // cyclin-dependent kinase 9 // 9q34.1 // 1025 /// ENST0000037	CDK9	NM_001261	1.69071	tumor up vs normal
NM_024815 // NUDT18 // nudix (nucleoside diphosphate linked moiety X)-type motif	NUDT18	NM_024815	1.55116	tumor up vs normal
NM_012413 // QPCT // glutaminyl-peptide cyclotransferase // 2p22.2 // 25797 ///	QPCT	NM_012413	1.7226	tumor up vs normal
NM_002412 // MGMT // O-6-methylguanine-DNA methyltransferase // 10q26 // 4255 //	MGMT	NM_002412	1.78416	tumor up vs normal
NM_024583 // SCRN3 // secernin 3 // 2q31.1 // 79634 /// NM_001193528 // SCRN3 //	SCRN3	NM_024583	-1.67115	tumor down vs normal
NM_004283 // RAB3D // RAB3D, member RAS oncogene family // 19p13.2 // 9545 /// N	RAB3D	NM_004283	1.87006	tumor up vs normal
NM_014678 // PPP6R2 // protein phosphatase 6, regulatory subunit 2 // 22q13.33 /	PPP6R2	NM_014678	1.74576	tumor up vs normal
NM_003536 // HIST1H3H // histone cluster 1, H3h // 6p22.1 // 8357 /// BC096128 /	HIST1H3H	NM_003536	-1.90177	tumor down vs normal
NM_001130483 // VRK2 // vaccinia related kinase 2 // 2p16.1 // 7444 /// NR_03644	VRK2	NM_001130483	-1.69995	tumor down vs normal
NM_138381 // OXNAD1 // oxidoreductase NAD-binding domain containing 1 // 3p25-p2	OXNAD1	NM_138381	-1.72453	tumor down vs normal
NM_002335 // LRP5 // low density lipoprotein receptor-related protein 5 // 11q13	LRP5	NM_002335	1.62597	tumor up vs normal
NM_021120 // DLG3 // discs, large homolog 3 (Drosophila) // Xq13.1 // 1741 /// N	DLG3	NM_021120	1.53084	tumor up vs normal
NM_004227 // CYTH3 // cytohesin 3 // 7p22.1 // 9265 /// ENST00000350796 // CYTH3	CYTH3	NM_004227	1.6582	tumor up vs normal
NM_005556 // KRT7 // keratin 7 // 12q12-q13 // 3855 /// ENST00000331817 // KRT7	KRT7	NM_005556	-1.78009	tumor down vs normal
NM_176795 // HRAS // v-Ha-ras Harvey rat sarcoma viral oncogene homolog // 11p15	HRAS	NM_176795	1.74188	tumor up vs normal
NM_004158 // PSPN // persephin // 19p13.3 // 5623 /// ENST00000245810 // PSPN //	PSPN	NM_004158	1.66716	tumor up vs normal
NM_207312 // TUBA3E // tubulin, alpha 3e // 2q21.1 // 112714 /// NM_080386 // TU	TUBA3E	NM_207312	-1.67696	tumor down vs normal
NM_057159 // LPAR1 // lysophosphatidic acid receptor 1 // 9q31.3 // 1902 /// NM_	LPAR1	NM_057159	-1.70306	tumor down vs normal
NM_006753 // SURF6 // surfeit 6 // 9q34.2 // 6838 /// ENST00000372022 // SURF6 /	SURF6	NM_006753	1.72799	tumor up vs normal
NM_015160 // PMPCA // peptidase (mitochondrial processing) alpha // 9q34.3 // 23	PMPCA	NM_015160	1.7703	tumor up vs normal
NM_003567 // BCAR3 // breast cancer anti-estrogen resistance 3 // 1p22.1 // 8412	BCAR3	NM_003567	-1.56054	tumor down vs normal
NM_001174084 // POLL // polymerase (DNA directed), lambda // 10q23 // 27343 ///	POLL	NM_001174084	1.57437	tumor up vs normal
NM_014350 // TNFAIP8 // tumor necrosis factor, alpha-induced protein 8 // 5q23.1	TNFAIP8	NM_014350	-1.70898	tumor down vs normal
NM_018027 // FRMD4A // FERM domain containing 4A // 10p13 // 55691 /// ENST00000	FRMD4A	NM_018027	1.53959	tumor up vs normal
NM_018649 // H2AFY2 // H2A histone family, member Y2 // 10q22 // 55506 /// ENST0	H2AFY2	NM_018649	1.66039	tumor up vs normal
NM_006120 // HLA-DMA // major histocompatibility complex, class II, DM alpha //	HLA-DMA	NM_006120	-1.86386	tumor down vs normal
NM_002269 // KPNA5 // karyopherin alpha 5 (importin alpha 6) // 6q22.1 // 3841 /	KPNA5	NM_002269	-1.75811	tumor down vs normal
NM_004472 // FOXD1 // forkhead box D1 // 5q12-q13 // 2297 /// U59832 // FOXD1 //	FOXD1	NM_004472	1.63999	tumor up vs normal
NM_000797 // DRD4 // dopamine receptor D4 // 11p15.5 // 1815 /// ENST00000176183	DRD4	NM_000797	1.61804	tumor up vs normal
NM_005444 // RQCD1 // RCD1 required for cell differentiation1 homolog (S. pombe)	RQCD1	NM_005444	-1.73356	tumor down vs normal
NM_181532 // ERAS // ES cell expressed Ras // Xp11.23 // 3266 /// ENST0000033827	ERAS	NM_181532	1.70657	tumor up vs normal
NM_014967 // FAN1 // FANCD2/FANCI-associated nuclease 1 // 15q13.2-q13.3 // 2290	FAN1	NM_014967	1.6861	tumor up vs normal
NM_004972 // JAK2 // Janus kinase 2 // 9p24 // 3717 /// ENST00000381652 // JAK2	JAK2	NM_004972	-1.72514	tumor down vs normal
NM_014007 // ZBTB43 // zinc finger and BTB domain containing 43 // 9q33-q34 // 2	ZBTB43	NM_014007	1.57849	tumor up vs normal
NM_005077 // TLE1 // transducin-like enhancer of split 1 (E(sp1) homolog, Drosop	TLE1	NM_005077	1.6199	tumor up vs normal
NM_173632 // ZNF776 // zinc finger protein 776 // 19q13.43 // 284309 /// NM_1383	ZNF776	NM_173632	1.5241	tumor up vs normal
---		---	-1.90224	tumor down vs normal
NM_030974 // SHARPIN // SHANK-associated RH domain interactor // 8q24.3 // 81858	SHARPIN	NM_030974	1.82304	tumor up vs normal
NM_015658 // NOC2L // nucleolar complex associated 2 homolog (S. cerevisiae) //	NOC2L	NM_015658	2.03454	tumor up vs normal
NM_005565 // LCP2 // lymphocyte cytosolic protein 2 (SH2 domain containing leuko	LCP2	NM_005565	-1.74201	tumor down vs normal
NM_173829 // SREK1IP1 // SREK1-interacting protein 1 // 5q12.3 // 285672 /// BC1	SREK1IP1	NM_173829	-1.70891	tumor down vs normal
NM_001040436 // YARS2 // tyrosyl-tRNA synthetase 2, mitochondrial // 12p11.21 //	YARS2	NM_001040436	1.56253	tumor up vs normal
NM_182523 // CMC1 // COX assembly mitochondrial protein homolog (S. cerevisiae)	CMC1	NM_182523	-2.00375	tumor down vs normal
NM_032780 // TMEM25 // transmembrane protein 25 // 11q23.3 // 84866 /// NM_00114	TMEM25	NM_032780	1.68536	tumor up vs normal
NM_030920 // ANP32E // acidic (leucine-rich) nuclear phosphoprotein 32 family, m	ANP32E	NM_030920	-1.8263	tumor down vs normal
NM_152551 // SNRNP48 // small nuclear ribonucleoprotein 48kDa (U11/U12) // 6p24.	SNRNP48	NM_152551	-1.75528	tumor down vs normal
NM_018998 // FBXW5 // F-box and WD repeat domain containing 5 // 9q34.3 // 54461	FBXW5	NM_018998	1.78949	tumor up vs normal
NM_015698 // GPKOW // G patch domain and KOW motifs // Xp11.23 // 27238 /// ENST	GPKOW	NM_015698	1.60517	tumor up vs normal
NM_006495 // EVI2B // ecotropic viral integration site 2B // 17q11.2 // 2124 ///	EVI2B	NM_006495	-2.09392	tumor down vs normal
NM_017814 // TMEM161A // transmembrane protein 161A // 19p13.11 // 54929 /// ENS	TMEM161A	NM_017814	1.63278	tumor up vs normal
NM_017856 // GEMIN8 // gem (nuclear organelle) associated protein 8 // Xp22.2 //	GEMIN8	NM_017856	1.73901	tumor up vs normal
NM_006076 // AGFG2 // ArfGAP with FG repeats 2 // 7q22.1 // 3268 /// ENST0000030	AGFG2	NM_006076	1.66467	tumor up vs normal
NM_176869 // PPA2 // pyrophosphatase (inorganic) 2 // 4q25 // 27068 /// NM_00690	PPA2	NM_176869	-1.74213	tumor down vs normal
NM_003192 // TBCC // tubulin folding cofactor C // 6p21.1 // 6903 /// ENST000002	TBCC	NM_003192	1.5791	tumor up vs normal
NM_012237 // SIRT2 // sirtuin 2 // 19q13 // 22933 /// NR_034146 // SIRT2 // sirt	SIRT2	NM_012237	1.67058	tumor up vs normal
NR_027889 // TMEM189 // transmembrane protein 189 // 20q13.2 // 387521 /// NM_19	TMEM189	NR_027889	1.59414	tumor up vs normal
NM_001080411 // ZNF433 // zinc finger protein 433 // 19p13.2 // 163059 /// NM_00	ZNF433	NM_001080411	1.56846	tumor up vs normal
NM_198887 // NUP43 // nucleoporin 43kDa // 6q25.1 // 348995 /// ENST00000340413	NUP43	NM_198887	-1.65298	tumor down vs normal
NM_024068 // OBFC2B // oligonucleotide/oligosaccharide-binding fold containing 2	OBFC2B	NM_024068	1.81391	tumor up vs normal
NM_003463 // PTP4A1 // protein tyrosine phosphatase type IVA, member 1 // 6q12 /	PTP4A1	NM_003463	-1.96119	tumor down vs normal
NM_005125 // CCS // copper chaperone for superoxide dismutase // 11q13 // 9973 /	CCS	NM_005125	1.78584	tumor up vs normal
NM_152594 // SPRED1 // sprouty-related, EVH1 domain containing 1 // 15q14 // 161	SPRED1	NM_152594	-1.7905	tumor down vs normal
NM_001134382 // IQSEC1 // IQ motif and Sec7 domain 1 // 3p25.2 // 9922 /// NM_01	IQSEC1	NM_001134382	-1.58535	tumor down vs normal
NM_001184783 // VDAC2 // voltage-dependent anion channel 2 // 10q22 // 7417 ///	VDAC2	NM_001184783	1.65031	tumor up vs normal
NM_002644 // PIGR // polymeric immunoglobulin receptor // 1q31-q41 // 5284 /// E	PIGR	NM_002644	-2.74567	tumor down vs normal
NM_024308 // DHRS11 // dehydrogenase/reductase (SDR family) member 11 // 17q12 /	DHRS11	NM_024308	1.70653	tumor up vs normal
NM_001004304 // ZNF740 // zinc finger protein 740 // 12q13.13 // 283337 /// ENST	ZNF740	NM_001004304	1.70643	tumor up vs normal
NM_005539 // INPP5A // inositol polyphosphate-5-phosphatase, 40kDa // 10q26.3 //	INPP5A	NM_005539	1.79718	tumor up vs normal
NM_001217 // CA11 // carbonic anhydrase XI // 19q13.3 // 770 /// ENST00000084798	CA11	NM_001217	1.65388	tumor up vs normal
NM_003234 // TFRC // transferrin receptor (p90, CD71) // 3q29 // 7037 /// NM_001	TFRC	NM_003234	-1.89785	tumor down vs normal
NM_004561 // OVOL1 // ovo-like 1(Drosophila) // 11q13 // 5017 /// ENST0000033598	OVOL1	NM_004561	1.5455	tumor up vs normal
NM_003313 // TSTA3 // tissue specific transplantation antigen P35B // 8q24.3 //	TSTA3	NM_003313	2.41881	tumor up vs normal
NM_013432 // NFKBIL2 // nuclear factor of kappa light polypeptide gene enhancer	NFKBIL2	NM_013432	1.4959	tumor up vs normal
NM_031488 // L3MBTL2 // l(3)mbt-like 2 (Drosophila) // 22q13.31-q13.33 // 83746	L3MBTL2	NM_031488	1.66968	tumor up vs normal
NM_005983 // SKP2 // S-phase kinase-associated protein 2 (p45) // 5p13 // 6502 /	SKP2	NM_005983	-1.65325	tumor down vs normal
NM_003598 // TEAD2 // TEA domain family member 2 // 19q13.3 // 8463 /// ENST0000	TEAD2	NM_003598	1.58452	tumor up vs normal
NM_020649 // CBX8 // chromobox homolog 8 // 17q25.3 // 57332 /// ENST00000269385	CBX8	NM_020649	1.58304	tumor up vs normal
NM_003435 // ZNF134 // zinc finger protein 134 // 19q13.4 // 7693 /// ENST000003	ZNF134	NM_003435	1.7018	tumor up vs normal
NM_001001668 // ZNF470 // zinc finger protein 470 // 19q13.43 // 388566 /// NM_1	ZNF470	NM_001001668	1.64125	tumor up vs normal
NR_024247 // MUM1 // melanoma associated antigen (mutated) 1 // 19p13.3 // 84939	MUM1	NR_024247	1.56047	tumor up vs normal
NM_020170 // NCLN // nicalin // 19p13.3 // 56926 /// ENST00000246117 // NCLN //	NCLN	NM_020170	1.60856	tumor up vs normal
NM_001161 // NUDT2 // nudix (nucleoside diphosphate linked moiety X)-type motif	NUDT2	NM_001161	1.82564	tumor up vs normal
NM_003026 // SH3GL2 // SH3-domain GRB2-like 2 // 9p22 // 6456 /// ENST0000038060	SH3GL2	NM_003026	1.67019	tumor up vs normal
NM_005412 // SHMT2 // serine hydroxymethyltransferase 2 (mitochondrial) // 12q12	SHMT2	NM_005412	1.91422	tumor up vs normal
NM_012239 // SIRT3 // sirtuin 3 // 11p15.5 // 23410 /// NM_001017524 // SIRT3 //	SIRT3	NM_012239	1.70204	tumor up vs normal
NM_002207 // ITGA9 // integrin, alpha 9 // 3p21.3 // 3680 /// ENST00000264741 //	ITGA9	NM_002207	-1.71975	tumor down vs normal
NM_018460 // ARHGAP15 // Rho GTPase activating protein 15 // 2q22.2-q22.3 // 558	ARHGAP15	NM_018460	-1.8626	tumor down vs normal
NM_001165258 // TMEM14C // transmembrane protein 14C // 6p24.2 // 51522 /// NM_0	TMEM14C	NM_001165258	-1.87557	tumor down vs normal
NM_032168 // WDR75 // WD repeat domain 75 // 2q32.2 // 84128 /// ENST00000314761	WDR75	NM_032168	-1.70395	tumor down vs normal
NM_004310 // RHOH // ras homolog gene family, member H // 4p13 // 399 /// ENST00	RHOH	NM_004310	-1.62834	tumor down vs normal
---		---	1.66719	tumor up vs normal
NM_006567 // FARS2 // phenylalanyl-tRNA synthetase 2, mitochondrial // 6p25.1 //	FARS2	NM_006567	-1.84453	tumor down vs normal
BC001181 // FAM173A // family with sequence similarity 173, member A // 16p13.3	FAM173A	BC001181	1.71053	tumor up vs normal
NM_004111 // FEN1 // flap structure-specific endonuclease 1 // 11q12 // 2237 ///	FEN1	NM_004111	1.56479	tumor up vs normal
NM_182710 // KAT5 // K(lysine) acetyltransferase 5 // 11q13 // 10524 /// NM_0063	KAT5	NM_182710	1.66741	tumor up vs normal
NM_003260 // TLE2 // transducin-like enhancer of split 2 (E(sp1) homolog, Drosop	TLE2	NM_003260	1.62901	tumor up vs normal
NM_015429 // ABI3BP // ABI family, member 3 (NESH) binding protein // 3q12 // 25	ABI3BP	NM_015429	-1.94408	tumor down vs normal
NM_003264 // TLR2 // toll-like receptor 2 // 4q32 // 7097 /// ENST00000260010 //	TLR2	NM_003264	-1.75767	tumor down vs normal
NM_018326 // GIMAP4 // GTPase, IMAP family member 4 // 7q36.1 // 55303 /// ENST0	GIMAP4	NM_018326	-1.72851	tumor down vs normal
NM_017457 // CYTH2 // cytohesin 2 // 19q13.33 // 9266 /// NM_004228 // CYTH2 //	CYTH2	NM_017457	1.77808	tumor up vs normal
NM_207426 // FOXI2 // forkhead box I2 // 10q26.2 // 399823 /// ENST00000388920 /	FOXI2	NM_207426	-1.55063	tumor down vs normal
NM_175856 // CHSY3 // chondroitin sulfate synthase 3 // 5q23.3 // 337876 /// ENS	CHSY3	NM_175856	-1.7271	tumor down vs normal
NM_002053 // GBP1 // guanylate binding protein 1, interferon-inducible, 67kDa //	GBP1	NM_002053	-1.98391	tumor down vs normal
NM_002751 // MAPK11 // mitogen-activated protein kinase 11 // 22q13.33 // 5600 /	MAPK11	NM_002751	1.5062	tumor up vs normal
NM_032852 // ATG4C // ATG4 autophagy related 4 homolog C (S. cerevisiae) // 1p31	ATG4C	NM_032852	-1.80243	tumor down vs normal
NM_014062 // NOB1 // NIN1/RPN12 binding protein 1 homolog (S. cerevisiae) // 16q	NOB1	NM_014062	1.81952	tumor up vs normal
NM_016255 // FAM8A1 // family with sequence similarity 8, member A1 // 6p23 // 5	FAM8A1	NM_016255	-1.61853	tumor down vs normal
NM_022165 // LIN7B // lin-7 homolog B (C. elegans) // 19q13.3 // 64130 /// ENST0	LIN7B	NM_022165	-1.5545	tumor down vs normal
NM_016835 // MAPT // microtubule-associated protein tau // 17q21.1 // 4137 /// N	MAPT	NM_016835	1.62322	tumor up vs normal
NM_015721 // GEMIN4 // gem (nuclear organelle) associated protein 4 // 17p13 //	GEMIN4	NM_015721	1.72865	tumor up vs normal
NM_003036 // SKI // v-ski sarcoma viral oncogene homolog (avian) // 1q22-q24 //	SKI	NM_003036	-1.69138	tumor down vs normal
NM_133502 // ZNF274 // zinc finger protein 274 // 19qter // 10782 /// NM_016325	ZNF274	NM_133502	1.54309	tumor up vs normal
NM_004068 // AP2M1 // adaptor-related protein complex 2, mu 1 subunit // 3q28 //	AP2M1	NM_004068	1.99725	tumor up vs normal
NM_032773 // LRCH3 // leucine-rich repeats and calponin homology (CH) domain con	LRCH3	NM_032773	-1.86175	tumor down vs normal
NM_020142 // NDUFA4L2 // NADH dehydrogenase (ubiquinone) 1 alpha subcomplex, 4-l	NDUFA4L2	NM_020142	1.55897	tumor up vs normal
NM_000116 // TAZ // tafazzin // Xq28 // 6901 /// NR_024048 // TAZ // tafazzin //	TAZ	NM_000116	1.62315	tumor up vs normal
NM_001001410 // C16orf42 // chromosome 16 open reading frame 42 // 16p13.3 // 11	C16orf42	NM_001001410	1.81679	tumor up vs normal
NM_002994 // CXCL5 // chemokine (C-X-C motif) ligand 5 // 4q13.3 // 6374 /// ENS	CXCL5	NM_002994	-1.85238	tumor down vs normal
NR_033230 // SMPD4 // sphingomyelin phosphodiesterase 4, neutral membrane (neutr	SMPD4	NR_033230	1.9014	tumor up vs normal
NM_001081563 // DMPK // dystrophia myotonica-protein kinase // 19q13.3 // 1760 /	DMPK	NM_001081563	1.79395	tumor up vs normal
NR_026887 // LOC80054 // hypothetical LOC80054 // 19q13.11 // 80054	LOC80054	NR_026887	1.89764	tumor up vs normal
NM_001112732 // MCF2L // MCF.2 cell line derived transforming sequence-like // 1	MCF2L	NM_001112732	1.62631	tumor up vs normal
NM_145113 // MAX // MYC associated factor X // 14q23 // 4149 /// NM_002382 // MA	MAX	NM_145113	-1.60521	tumor down vs normal
NM_139172 // TMEM190 // transmembrane protein 190 // 19q13.42 // 147744 /// ENST	TMEM190	NM_139172	1.62561	tumor up vs normal
NM_001025091 // ABCF1 // ATP-binding cassette, sub-family F (GCN20), member 1 //	ABCF1	NM_001025091	1.64028	tumor up vs normal
NM_004286 // GTPBP1 // GTP binding protein 1 // 22q13.1 // 9567 /// ENST00000216	GTPBP1	NM_004286	1.61791	tumor up vs normal
NM_024747 // HPS6 // Hermansky-Pudlak syndrome 6 // 10q24.32 // 79803 /// ENST00	HPS6	NM_024747	1.69002	tumor up vs normal
NM_012068 // ATF5 // activating transcription factor 5 // 19q13.3 // 22809 /// N	ATF5	NM_012068	1.5433	tumor up vs normal
NM_031469 // SH3BGRL2 // SH3 domain binding glutamic acid-rich protein like 2 //	SH3BGRL2	NM_031469	-1.95209	tumor down vs normal
NM_001040159 // SPOCK3 // sparc/osteonectin, cwcv and kazal-like domains proteog	SPOCK3	NM_001040159	-1.78142	tumor down vs normal
NM_005716 // GIPC1 // GIPC PDZ domain containing family, member 1 // 19p13.1 //	GIPC1	NM_005716	1.81658	tumor up vs normal
NM_000441 // SLC26A4 // solute carrier family 26, member 4 // 7q31 // 5172 /// E	SLC26A4	NM_000441	-2.31274	tumor down vs normal
NM_003021 // SGTA // small glutamine-rich tetratricopeptide repeat (TPR)-contain	SGTA	NM_003021	1.74048	tumor up vs normal
NM_032840 // SPRYD3 // SPRY domain containing 3 // 12q13.13 // 84926 /// ENST000	SPRYD3	NM_032840	1.77827	tumor up vs normal
NM_002965 // S100A9 // S100 calcium binding protein A9 // 1q21 // 6280 /// ENST0	S100A9	NM_002965	-1.99465	tumor down vs normal
NM_181342 // FKBP7 // FK506 binding protein 7 // 2q31.2 // 51661 /// NM_00113521	FKBP7	NM_181342	-1.68078	tumor down vs normal
NM_000601 // HGF // hepatocyte growth factor (hepapoietin A; scatter factor) //	HGF	NM_000601	-1.77075	tumor down vs normal
NM_021809 // TGIF2 // TGFB-induced factor homeobox 2 // 20q11.23 // 60436 /// EN	TGIF2	NM_021809	1.55018	tumor up vs normal
NM_198892 // BMP2K // BMP2 inducible kinase // 4q21.21 // 55589 /// NM_017593 //	BMP2K	NM_198892	-1.56583	tumor down vs normal
NM_001853 // COL9A3 // collagen, type IX, alpha 3 // 20q13.3 // 1299 /// ENST000	COL9A3	NM_001853	1.65215	tumor up vs normal
NM_020410 // ATP13A1 // ATPase type 13A1 // 19p13.11 // 57130 /// ENST0000035732	ATP13A1	NM_020410	1.63733	tumor up vs normal
NM_001162893 // KIAA0040 // KIAA0040 // 1q24-q25 // 9674 /// NM_001162894 // KIA	KIAA0040	NM_001162893	-1.64588	tumor down vs normal
NM_014475 // DHDH // dihydrodiol dehydrogenase (dimeric) // 19q13.3 // 27294 ///	DHDH	NM_014475	1.61799	tumor up vs normal
NM_014572 // LATS2 // LATS, large tumor suppressor, homolog 2 (Drosophila) // 13	LATS2	NM_014572	1.59475	tumor up vs normal
NM_021078 // KAT2A // K(lysine) acetyltransferase 2A // 17q21 // 2648 /// ENST00	KAT2A	NM_021078	1.82182	tumor up vs normal
NM_134260 // RORA // RAR-related orphan receptor A // 15q22.2 // 6095 /// NM_002	RORA	NM_134260	-1.64126	tumor down vs normal
NM_001136042 // AARSD1 // alanyl-tRNA synthetase domain containing 1 // 17q21.31	AARSD1	NM_001136042	1.62651	tumor up vs normal
NM_175862 // CD86 // CD86 molecule // 3q21 // 942 /// NM_006889 // CD86 // CD86	CD86	NM_175862	-1.65805	tumor down vs normal
NM_024574 // C4orf31 // chromosome 4 open reading frame 31 // 4q27 // 79625 ///	C4orf31	NM_024574	-1.848	tumor down vs normal
NM_007167 // ZMYM6 // zinc finger, MYM-type 6 // 1p34.2 // 9204 /// ENST00000357	ZMYM6	NM_007167	-1.60719	tumor down vs normal
BC008284 // C16orf48 // chromosome 16 open reading frame 48 // 16q22.1 // 84080	C16orf48	BC008284	1.56376	tumor up vs normal
NM_182901 // C11orf17 // chromosome 11 open reading frame 17 // 11p15.3 // 56672	C11orf17	NM_182901	1.64423	tumor up vs normal
NM_015069 // ZNF423 // zinc finger protein 423 // 16q12 // 23090 /// ENST0000026	ZNF423	NM_015069	-1.64188	tumor down vs normal
NM_003492 // TMEM187 // transmembrane protein 187 // Xq28 // 8269 /// ENST000003	TMEM187	NM_003492	1.68844	tumor up vs normal
NM_012248 // SEPHS2 // selenophosphate synthetase 2 // 16p11.2 // 22928 /// ENST	SEPHS2	NM_012248	1.647	tumor up vs normal
NM_001060 // TBXA2R // thromboxane A2 receptor // 19p13.3 // 6915 /// NM_201636	TBXA2R	NM_001060	1.66013	tumor up vs normal
NM_031206 // LAS1L // LAS1-like (S. cerevisiae) // Xq12 // 81887 /// NM_00117064	LAS1L	NM_031206	1.56029	tumor up vs normal
NR_003672 // SNHG7 // small nucleolar RNA host gene 7 (non-protein coding) // 9q	SNHG7	NR_003672	1.65505	tumor up vs normal
NM_025204 // TRABD // TraB domain containing // 22q13.33 // 80305 /// ENST000003	TRABD	NM_025204	1.66583	tumor up vs normal
NM_022779 // DDX31 // DEAD (Asp-Glu-Ala-Asp) box polypeptide 31 // 9q34.13 // 64	DDX31	NM_022779	1.53192	tumor up vs normal
NM_001105540 // DGKZ // diacylglycerol kinase, zeta 104kDa // 11p11.2 // 8525 //	DGKZ	NM_001105540	1.6575	tumor up vs normal
NM_001001556 // GALK2 // galactokinase 2 // 15q21.1-q21.2 // 2585 /// NM_002044	GALK2	NM_001001556	-1.65711	tumor down vs normal
NM_053006 // TSSK2 // testis-specific serine kinase 2 // 22q11.21 // 23617 /// E	TSSK2	NM_053006	-1.63895	tumor down vs normal
NM_016063 // HDDC2 // HD domain containing 2 // 6q13-q24.3 // 51020 /// ENST0000	HDDC2	NM_016063	-1.72733	tumor down vs normal
NM_032038 // SPNS1 // spinster homolog 1 (Drosophila) // 16p11.2 // 83985 /// NM	SPNS1	NM_032038	1.64962	tumor up vs normal
NM_015184 // PLCL2 // phospholipase C-like 2 // 3p24.3 // 23228 /// NM_001144382	PLCL2	NM_015184	-1.64983	tumor down vs normal
NM_001937 // DPT // dermatopontin // 1q12-q23 // 1805 /// ENST00000367817 // DPT	DPT	NM_001937	-1.91537	tumor down vs normal
NM_024595 // AKIRIN1 // akirin 1 // 1p34.3 // 79647 /// NM_001136275 // AKIRIN1	AKIRIN1	NM_024595	-1.99984	tumor down vs normal
NM_015157 // PHLDB1 // pleckstrin homology-like domain, family B, member 1 // 11	PHLDB1	NM_015157	1.53539	tumor up vs normal
NM_024083 // ASPSCR1 // alveolar soft part sarcoma chromosome region, candidate	ASPSCR1	NM_024083	1.56286	tumor up vs normal
NM_018210 // CARKD // carbohydrate kinase domain containing // 13q34 // 55739 //	CARKD	NM_018210	1.77033	tumor up vs normal
NM_024762 // ZNF552 // zinc finger protein 552 // 19q13.43 // 79818 /// ENST0000	ZNF552	NM_024762	1.68689	tumor up vs normal
NM_032711 // MAFG // v-maf musculoaponeurotic fibrosarcoma oncogene homolog G (a	MAFG	NM_032711	1.7316	tumor up vs normal
NM_001017995 // SH3PXD2B // SH3 and PX domains 2B // 5q35.1 // 285590 /// ENST00	SH3PXD2B	NM_001017995	-1.81728	tumor down vs normal
NM_001193308 // SYTL1 // synaptotagmin-like 1 // 1p36.11 // 84958 /// NM_032872	SYTL1	NM_001193308	1.89248	tumor up vs normal
NM_178525 // ACTL9 // actin-like 9 // 19p13.2 // 284382 /// ENST00000324436 // A	ACTL9	NM_178525	1.70068	tumor up vs normal
NM_032642 // WNT5B // wingless-type MMTV integration site family, member 5B // 1	WNT5B	NM_032642	1.65301	tumor up vs normal
NM_006571 // DCTN6 // dynactin 6 // 8p12-p11 // 10671 /// ENST00000221114 // DCT	DCTN6	NM_006571	-1.88166	tumor down vs normal
NM_152680 // TMEM154 // transmembrane protein 154 // 4q31.3 // 201799 /// ENST00	TMEM154	NM_152680	-1.74958	tumor down vs normal
NM_001431 // EPB41L2 // erythrocyte membrane protein band 4.1-like 2 // 6q23 //	EPB41L2	NM_001431	-1.76532	tumor down vs normal
NM_006779 // CDC42EP2 // CDC42 effector protein (Rho GTPase binding) 2 // 11q13	CDC42EP2	NM_006779	1.63064	tumor up vs normal
NM_003668 // MAPKAPK5 // mitogen-activated protein kinase-activated protein kina	MAPKAPK5	NM_003668	1.68504	tumor up vs normal
NM_014865 // NCAPD2 // non-SMC condensin I complex, subunit D2 // 12p13.3 // 991	NCAPD2	NM_014865	1.5714	tumor up vs normal
NM_152328 // ADSSL1 // adenylosuccinate synthase like 1 // 14q32.33 // 122622 //	ADSSL1	NM_152328	1.59795	tumor up vs normal
NM_032997 // ZWINT // ZW10 interactor // 10q21-q22 // 11130 /// NM_007057 // ZWI	ZWINT	NM_032997	1.57545	tumor up vs normal
NM_001135218 // TAF12 // TAF12 RNA polymerase II, TATA box binding protein (TBP)	TAF12	NM_001135218	-1.62604	tumor down vs normal
NM_001136154 // ERG // v-ets erythroblastosis virus E26 oncogene homolog (avian)	ERG	NM_001136154	2.28341	tumor up vs normal
NM_001001548 // CD36 // CD36 molecule (thrombospondin receptor) // 7q11.2 // 948	CD36	NM_001001548	-1.58925	tumor down vs normal
NM_181523 // PIK3R1 // phosphoinositide-3-kinase, regulatory subunit 1 (alpha) /	PIK3R1	NM_181523	-1.91429	tumor down vs normal
NM_032859 // ABHD13 // abhydrolase domain containing 13 // 13q33.3 // 84945 ///	ABHD13	NM_032859	-1.78119	tumor down vs normal
NM_018049 // PLEKHJ1 // pleckstrin homology domain containing, family J member 1	PLEKHJ1	NM_018049	1.8676	tumor up vs normal
NM_152778 // MFSD8 // major facilitator superfamily domain containing 8 // 4q28.	MFSD8	NM_152778	-1.69833	tumor down vs normal
NM_003533 // HIST1H3I // histone cluster 1, H3i // 6p22.1 // 8354 /// BC066884 /	HIST1H3I	NM_003533	-2.30362	tumor down vs normal
NM_003560 // PLA2G6 // phospholipase A2, group VI (cytosolic, calcium-independen	PLA2G6	NM_003560	1.57128	tumor up vs normal
NM_032868 // MPND // MPN domain containing // 19p13.3 // 84954 /// NM_001159846	MPND	NM_032868	1.66582	tumor up vs normal
NM_003325 // HIRA // HIR histone cell cycle regulation defective homolog A (S. c	HIRA	NM_003325	1.62597	tumor up vs normal
NM_015846 // MBD1 // methyl-CpG binding domain protein 1 // 18q21 // 4152 /// NM	MBD1	NM_015846	1.59772	tumor up vs normal
NM_024100 // WDR18 // WD repeat domain 18 // 19p13.3 // 57418 /// ENST0000025128	WDR18	NM_024100	1.76981	tumor up vs normal
NM_024813 // RPAP2 // RNA polymerase II associated protein 2 // 1p22.1 // 79871	RPAP2	NM_024813	-1.73508	tumor down vs normal
NM_001128228 // TPRN // taperin // 9q34.3 // 286262 /// ENST00000409012 // TPRN	TPRN	NM_001128228	1.59671	tumor up vs normal
NM_003983 // SLC7A6 // solute carrier family 7 (cationic amino acid transporter,	SLC7A6	NM_003983	-1.61832	tumor down vs normal
NM_001767 // CD2 // CD2 molecule // 1p13.1 // 914 /// ENST00000369478 // CD2 //	CD2	NM_001767	-1.71809	tumor down vs normal
NM_004280 // EEF1E1 // eukaryotic translation elongation factor 1 epsilon 1 // 6	EEF1E1	NM_004280	-1.65971	tumor down vs normal
NM_033025 // SYDE1 // synapse defective 1, Rho GTPase, homolog 1 (C. elegans) //	SYDE1	NM_033025	1.56191	tumor up vs normal
NM_033103 // RHPN2 // rhophilin, Rho GTPase binding protein 2 // 19q13.11 // 854	RHPN2	NM_033103	1.89609	tumor up vs normal
NM_001130475 // THAP5 // THAP domain containing 5 // 7q31.1 // 168451 /// NM_182	THAP5	NM_001130475	-1.73897	tumor down vs normal
NM_001114394 // PAPD4 // PAP associated domain containing 4 // 5q14.1 // 167153	PAPD4	NM_001114394	-1.8649	tumor down vs normal
NM_003985 // TNK1 // tyrosine kinase, non-receptor, 1 // 17p13.1 // 8711 /// ENS	TNK1	NM_003985	1.53446	tumor up vs normal
NM_033107 // GTPBP10 // GTP-binding protein 10 (putative) // 7q21.13 // 85865 //	GTPBP10	NM_033107	-1.70429	tumor down vs normal
NM_006562 // LBX1 // ladybird homeobox 1 // 10q24 // 10660 /// ENST00000370193 /	LBX1	NM_006562	1.49999	tumor up vs normal
NM_003367 // USF2 // upstream transcription factor 2, c-fos interacting // 19q13	USF2	NM_003367	1.66533	tumor up vs normal
NM_002826 // QSOX1 // quiescin Q6 sulfhydryl oxidase 1 // 1q24 // 5768 /// NM_00	QSOX1	NM_002826	-1.6084	tumor down vs normal
NM_003627 // SLC43A1 // solute carrier family 43, member 1 // 11p11.2-p11.1 // 8	SLC43A1	NM_003627	1.88916	tumor up vs normal
NM_015056 // RRP1B // ribosomal RNA processing 1 homolog B (S. cerevisiae) // 21	RRP1B	NM_015056	1.52387	tumor up vs normal
NM_001247 // ENTPD6 // ectonucleoside triphosphate diphosphohydrolase 6 (putativ	ENTPD6	NM_001247	1.97163	tumor up vs normal
NM_006156 // NEDD8 // neural precursor cell expressed, developmentally down-regu	NEDD8	NM_006156	-1.57391	tumor down vs normal
NM_032376 // TMEM101 // transmembrane protein 101 // 17q21.31 // 84336 /// ENST0	TMEM101	NM_032376	1.80219	tumor up vs normal
NM_207577 // MAP6 // microtubule-associated protein 6 // 11q13.5 // 4135 /// NM_	MAP6	NM_207577	1.56887	tumor up vs normal
NM_053055 // THEM4 // thioesterase superfamily member 4 // 1q21 // 117145 /// EN	THEM4	NM_053055	-1.59468	tumor down vs normal
NM_001135947 // URM1 // ubiquitin related modifier 1 // 9q34.11 // 81605 /// NM_	URM1	NM_001135947	1.83551	tumor up vs normal
NM_000697 // ALOX12 // arachidonate 12-lipoxygenase // 17p13.1 // 239 /// ENST00	ALOX12	NM_000697	1.9826	tumor up vs normal
NM_173627 // FLJ35220 // hypothetical protein FLJ35220 // 17q25.3 // 284131 ///	FLJ35220	NM_173627	1.56218	tumor up vs normal
NM_017993 // ENOX1 // ecto-NOX disulfide-thiol exchanger 1 // 13q14.11 // 55068	ENOX1	NM_017993	1.62758	tumor up vs normal
NM_148894 // BOD1L // biorientation of chromosomes in cell division 1-like // 4p	BOD1L	NM_148894	-1.74038	tumor down vs normal
NM_153331 // KCTD6 // potassium channel tetramerisation domain containing 6 // 3	KCTD6	NM_153331	-1.70037	tumor down vs normal
NM_003119 // SPG7 // spastic paraplegia 7 (pure and complicated autosomal recess	SPG7	NM_003119	1.55187	tumor up vs normal
NM_001190849 // CNOT4 // CCR4-NOT transcription complex, subunit 4 // 7q22-qter	CNOT4	NM_001190849	-1.81752	tumor down vs normal
NM_000681 // ADRA2A // adrenergic, alpha-2A-, receptor // 10q24-q26 // 150 /// E	ADRA2A	NM_000681	1.63349	tumor up vs normal
NM_003246 // THBS1 // thrombospondin 1 // 15q15 // 7057 /// ENST00000260356 // T	THBS1	NM_003246	-1.98465	tumor down vs normal
NM_000553 // WRN // Werner syndrome, RecQ helicase-like // 8p12 // 7486 /// ENST	WRN	NM_000553	-1.61388	tumor down vs normal
NM_144590 // ANKRD22 // ankyrin repeat domain 22 // 10q23.31 // 118932 /// ENST0	ANKRD22	NM_144590	-1.69627	tumor down vs normal
NM_006659 // TUBGCP2 // tubulin, gamma complex associated protein 2 // 10q26.3 /	TUBGCP2	NM_006659	1.7568	tumor up vs normal
NM_004177 // STX3 // syntaxin 3 // 11q12.1 // 6809 /// NM_001178040 // STX3 // s	STX3	NM_004177	1.64669	tumor up vs normal
NM_021932 // RIC8A // resistance to inhibitors of cholinesterase 8 homolog A (C.	RIC8A	NM_021932	1.85724	tumor up vs normal
NM_001961 // EEF2 // eukaryotic translation elongation factor 2 // 19pter-q12 //	EEF2	NM_001961	1.78343	tumor up vs normal
NM_173548 // ZNF584 // zinc finger protein 584 // 19q13.43 // 201514 /// ENST000	ZNF584	NM_173548	1.57396	tumor up vs normal
NM_001008540 // CXCR4 // chemokine (C-X-C motif) receptor 4 // 2q21 // 7852 ///	CXCR4	NM_001008540	-1.91673	tumor down vs normal
NM_004261 // SEP15 // 15 kDa selenoprotein // 1p31 // 9403 /// NM_203341 // SEP1	2012-09-15	NM_004261	-1.65311	tumor down vs normal
NM_001144831 // PHB2 // prohibitin 2 // 12p13 // 11331 /// NM_007273 // PHB2 //	PHB2	NM_001144831	1.80876	tumor up vs normal
NM_001081455 // P2RY14 // purinergic receptor P2Y, G-protein coupled, 14 // 3q24	P2RY14	NM_001081455	-1.85898	tumor down vs normal
NM_138384 // MTG1 // mitochondrial GTPase 1 homolog (S. cerevisiae) // 10q26.3 /	MTG1	NM_138384	1.64797	tumor up vs normal
NM_020192 // C7orf36 // chromosome 7 open reading frame 36 // 7p14.1 // 57002 //	C7orf36	NM_020192	-2.00953	tumor down vs normal
NM_017739 // POMGNT1 // protein O-linked mannose beta1,2-N-acetylglucosaminyltra	POMGNT1	NM_017739	1.82512	tumor up vs normal
NM_015291 // DNAJC16 // DnaJ (Hsp40) homolog, subfamily C, member 16 // 1p36.1 /	DNAJC16	NM_015291	-1.70408	tumor down vs normal
NM_006502 // POLH // polymerase (DNA directed), eta // 6p21.1 // 5429 /// ENST00	POLH	NM_006502	-1.65735	tumor down vs normal
NM_018471 // ZC3H15 // zinc finger CCCH-type containing 15 // 2q32.1 // 55854 //	ZC3H15	NM_018471	-1.72918	tumor down vs normal
NM_024297 // PHF23 // PHD finger protein 23 // 17p13.1 // 79142 /// ENST00000320	PHF23	NM_024297	1.7702	tumor up vs normal
NM_005956 // MTHFD1 // methylenetetrahydrofolate dehydrogenase (NADP+ dependent)	MTHFD1	NM_005956	1.6609	tumor up vs normal
NM_001654 // ARAF // v-raf murine sarcoma 3611 viral oncogene homolog // Xp11.4-	ARAF	NM_001654	1.83687	tumor up vs normal
NM_006762 // LAPTM5 // lysosomal protein transmembrane 5 // 1p34 // 7805 /// ENS	LAPTM5	NM_006762	-2.15141	tumor down vs normal
NM_004118 // FOXS1 // forkhead box S1 // 20q11.21 // 2307 /// ENST00000375978 //	FOXS1	NM_004118	1.56908	tumor up vs normal
NM_030666 // SERPINB1 // serpin peptidase inhibitor, clade B (ovalbumin), member	SERPINB1	NM_030666	-1.88045	tumor down vs normal
NM_145740 // GSTA1 // glutathione S-transferase alpha 1 // 6p12.1 // 2938 /// EN	GSTA1	NM_145740	-1.81149	tumor down vs normal
NM_202001 // ERCC1 // excision repair cross-complementing rodent repair deficien	ERCC1	NM_202001	1.63071	tumor up vs normal
NM_012139 // SERGEF // secretion regulating guanine nucleotide exchange factor /	SERGEF	NM_012139	1.92891	tumor up vs normal
NM_024701 // ASB13 // ankyrin repeat and SOCS box-containing 13 // 10p15.1 // 79	ASB13	NM_024701	1.58582	tumor up vs normal
NM_181610 // KRTAP19-4 // keratin associated protein 19-4 // 21q22.1 // 337971 /	KRTAP19-4	NM_181610	1.67632	tumor up vs normal
NM_033284 // TBL1Y // transducin (beta)-like 1, Y-linked // Yp11.2 // 90665 ///	TBL1Y	NM_033284	1.55596	tumor up vs normal
NM_015247 // CYLD // cylindromatosis (turban tumor syndrome) // 16q12.1 // 1540	CYLD	NM_015247	-1.72508	tumor down vs normal
NM_015419 // MXRA5 // matrix-remodelling associated 5 // Xp22.33 // 25878 /// EN	MXRA5	NM_015419	-1.74674	tumor down vs normal
NM_018335 // ZNF839 // zinc finger protein 839 // 14q32.31 // 55778 /// ENST0000	ZNF839	NM_018335	1.58806	tumor up vs normal
NM_153350 // FBXL16 // F-box and leucine-rich repeat protein 16 // 16p13.3 // 14	FBXL16	NM_153350	1.51087	tumor up vs normal
NM_014895 // KIAA1009 // KIAA1009 // 6q14.3 // 22832 /// ENST00000403245 // KIAA	KIAA1009	NM_014895	-1.63505	tumor down vs normal
NM_016150 // ASB2 // ankyrin repeat and SOCS box-containing 2 // 14q31-q32 // 51	ASB2	NM_016150	1.5667	tumor up vs normal
NM_001113525 // ZNF276 // zinc finger protein 276 // 16q24.3 // 92822 /// NM_152	ZNF276	NM_001113525	1.58521	tumor up vs normal
NM_001512 // GSTA4 // glutathione S-transferase alpha 4 // 6p12.1 // 2941 /// EN	GSTA4	NM_001512	-1.71238	tumor down vs normal
NM_152230 // IPMK // inositol polyphosphate multikinase // 10q21.1 // 253430 ///	IPMK	NM_152230	-1.57177	tumor down vs normal
NM_005073 // SLC15A1 // solute carrier family 15 (oligopeptide transporter), mem	SLC15A1	NM_005073	1.62396	tumor up vs normal
NM_020313 // CIAPIN1 // cytokine induced apoptosis inhibitor 1 // 16q13-q21 // 5	CIAPIN1	NM_020313	1.71335	tumor up vs normal
NM_007131 // ZNF75D // zinc finger protein 75D // Xq26.3 // 7626 /// NM_00118506	ZNF75D	NM_007131	1.57881	tumor up vs normal
NM_177938 // P4HTM // prolyl 4-hydroxylase, transmembrane (endoplasmic reticulum	P4HTM	NM_177938	1.81205	tumor up vs normal
NM_013262 // MYLIP // myosin regulatory light chain interacting protein // 6p23-	MYLIP	NM_013262	1.60579	tumor up vs normal
NM_000543 // SMPD1 // sphingomyelin phosphodiesterase 1, acid lysosomal // 11p15	SMPD1	NM_000543	1.79973	tumor up vs normal
NM_005186 // CAPN1 // calpain 1, (mu/I) large subunit // 11q13 // 823 /// ENST00	CAPN1	NM_005186	1.71798	tumor up vs normal
NM_206914 // FAM119B // family with sequence similarity 119, member B // 12q14.1	FAM119B	NM_206914	1.57289	tumor up vs normal
NR_026693 // ZNF487P // zinc finger protein 487, pseudogene // 10q11.21 // 64281	ZNF487P	NR_026693	1.72376	tumor up vs normal
NM_199069 // NDUFAF3 // NADH dehydrogenase (ubiquinone) 1 alpha subcomplex, asse	NDUFAF3	NM_199069	-1.66324	tumor down vs normal
NM_198273 // LYSMD3 // LysM, putative peptidoglycan-binding, domain containing 3	LYSMD3	NM_198273	-1.90569	tumor down vs normal
NM_001128917 // TOMM40 // translocase of outer mitochondrial membrane 40 homolog	TOMM40	NM_001128917	1.77332	tumor up vs normal
NM_022356 // LEPRE1 // leucine proline-enriched proteoglycan (leprecan) 1 // 1p3	LEPRE1	NM_022356	1.48001	tumor up vs normal
NM_020967 // NCOA5 // nuclear receptor coactivator 5 // 20q12-q13.12 // 57727 //	NCOA5	NM_020967	1.64717	tumor up vs normal
NM_025072 // PTGES2 // prostaglandin E synthase 2 // 9q34.11 // 80142 /// NR_027	PTGES2	NM_025072	1.60437	tumor up vs normal
NM_021018 // HIST1H3F // histone cluster 1, H3f // 6p22.2 // 8968 /// BC096131 /	HIST1H3F	NM_021018	-1.76698	tumor down vs normal
NM_032231 // FAM96A // family with sequence similarity 96, member A // 15q22.31	FAM96A	NM_032231	-2.0495	tumor down vs normal
NM_019612 // IRGC // immunity-related GTPase family, cinema // 19q13.31 // 56269	IRGC	NM_019612	1.62736	tumor up vs normal
NM_003025 // SH3GL1 // SH3-domain GRB2-like 1 // 19p13.3 // 6455 /// ENST0000026	SH3GL1	NM_003025	1.65284	tumor up vs normal
NM_002372 // MAN2A1 // mannosidase, alpha, class 2A, member 1 // 5q21-q22 // 412	MAN2A1	NM_002372	-1.62306	tumor down vs normal
NM_032175 // UTP15 // UTP15, U3 small nucleolar ribonucleoprotein, homolog (S. c	UTP15	NM_032175	-1.64283	tumor down vs normal
NM_004640 // BAT1 // HLA-B associated transcript 1 // 6p21.3 // 7919 /// NM_0805	BAT1	NM_004640	-1.5041	tumor down vs normal
NM_006397 // RNASEH2A // ribonuclease H2, subunit A // 19p13.2 // 10535 /// ENST	RNASEH2A	NM_006397	1.63576	tumor up vs normal
NM_016256 // NAGPA // N-acetylglucosamine-1-phosphodiester alpha-N-acetylglucosa	NAGPA	NM_016256	1.51327	tumor up vs normal
NM_007103 // NDUFV1 // NADH dehydrogenase (ubiquinone) flavoprotein 1, 51kDa //	NDUFV1	NM_007103	1.9231	tumor up vs normal
NM_012247 // SEPHS1 // selenophosphate synthetase 1 // 10p14 // 22929 /// NM_001	SEPHS1	NM_012247	1.68395	tumor up vs normal
NM_021249 // SNX6 // sorting nexin 6 // 14q13.1 // 58533 /// NM_152233 // SNX6 /	SNX6	NM_021249	-1.95187	tumor down vs normal
NM_016100 // NAA20 // N(alpha)-acetyltransferase 20, NatB catalytic subunit // 2	NAA20	NM_016100	1.76921	tumor up vs normal
NM_000491 // C1QB // complement component 1, q subcomponent, B chain // 1p36.12	C1QB	NM_000491	-1.82622	tumor down vs normal
NM_001193388 // UNKL // unkempt homolog (Drosophila)-like // 16p13.3 // 64718 //	UNKL	NM_001193388	1.56962	tumor up vs normal
NM_133497 // KCNV2 // potassium channel, subfamily V, member 2 // 9p24.2 // 1695	KCNV2	NM_133497	1.58669	tumor up vs normal
NM_005614 // RHEB // Ras homolog enriched in brain // 7q36 // 6009 /// ENST00000	RHEB	NM_005614	-1.6471	tumor down vs normal
NM_000576 // IL1B // interleukin 1, beta // 2q14 // 3553 /// ENST00000263341 //	IL1B	NM_000576	-1.74453	tumor down vs normal
NM_031302 // GLT8D2 // glycosyltransferase 8 domain containing 2 // 12q // 83468	GLT8D2	NM_031302	-1.77993	tumor down vs normal
NM_031413 // CECR2 // cat eye syndrome chromosome region, candidate 2 // 22q11.2	CECR2	NM_031413	1.56974	tumor up vs normal
NM_006639 // CYSLTR1 // cysteinyl leukotriene receptor 1 // Xq13.2-q21.1 // 1080	CYSLTR1	NM_006639	-1.69988	tumor down vs normal
NM_004138 // KRT33A // keratin 33A // 17q12-q21 // 3883 /// NM_002279 // KRT33B	KRT33A	NM_004138	2.4521	tumor up vs normal
NM_174912 // FAAH2 // fatty acid amide hydrolase 2 // Xp11.21 // 158584 /// ENST	FAAH2	NM_174912	1.60426	tumor up vs normal
NM_024792 // FAM57A // family with sequence similarity 57, member A // 17p13.3 /	FAM57A	NM_024792	1.80331	tumor up vs normal
NM_016140 // TPPP3 // tubulin polymerization-promoting protein family member 3 /	TPPP3	NM_016140	-1.72957	tumor down vs normal
NM_006014 // LAGE3 // L antigen family, member 3 // Xq28 // 8270 /// ENST0000035	LAGE3	NM_006014	1.85312	tumor up vs normal
NM_152415 // VPS37A // vacuolar protein sorting 37 homolog A (S. cerevisiae) //	VPS37A	NM_152415	-1.65719	tumor down vs normal

## Sheet: AAcancer vs CAcancer
Supplemental Table S3c. 1188 genes differentially expressed (ANOVA, 10% FDR, >1.5 fold changes) in AA cancer vs. CA cancer.
Transcript Cluster ID	gene_assignment	Gene Symbol	RefSeq	Ratio(AA vs. CA)	Fold-Change(AA vs. CA)	Fold-Change(AA vs. CA) (Description)
3006133	NM_022906 // STAG3L4 // stromal antigen 3-like 4 // 7p11.2-q11.2 // 64940 /// EN	STAG3L4	NM_022906	0.383407	-2.6082	AA down vs CA
2459793	NM_145257 // C1orf96 // chromosome 1 open reading frame 96 // 1q42.13 // 126731	C1orf96	NM_145257	0.399118	-2.50553	AA down vs CA
3684548	NR_003370 // RRN3P1 // RNA polymerase I transcription factor homolog (S. cerevis	RRN3P1	NR_003370	0.404015	-2.47516	AA down vs CA
3978943	NM_007250 // KLF8 // Kruppel-like factor 8 // Xp11.21 // 11279 /// NM_001159296	KLF8	NM_007250	0.404591	-2.47163	AA down vs CA
2940826	NM_030810 // TXNDC5 // thioredoxin domain containing 5 (endoplasmic reticulum) /	TXNDC5	NM_030810	2.37911	2.37911	AA up vs CA
2564634	NM_032788 // ZNF514 // zinc finger protein 514 // 2q11.1 // 84874 /// ENST000004	ZNF514	NM_032788	0.431339	-2.31836	AA down vs CA
3186123	NM_000607 // ORM1 // orosomucoid 1 // 9q31-q32 // 5004 /// NM_000608 // ORM2 //	ORM1	NM_000607	2.26847	2.26847	AA up vs CA
2947572	NM_006510 // TRIM27 // tripartite motif-containing 27 // 6p22 // 5987 /// ENST00	TRIM27	NM_006510	2.25697	2.25697	AA up vs CA
3554360	NM_152328 // ADSSL1 // adenylosuccinate synthase like 1 // 14q32.33 // 122622 //	ADSSL1	NM_152328	0.446975	-2.23726	AA down vs CA
4027639	NM_000132 // F8 // coagulation factor VIII, procoagulant component // Xq28 // 21	F8	NM_000132	0.448277	-2.23076	AA down vs CA
3949017	NM_017931 // TTC38 // tetratricopeptide repeat domain 38 // 22q13 // 55020 /// B	TTC38	NM_017931	2.22463	2.22463	AA up vs CA
2534324	NM_015893 // PRLH // prolactin releasing hormone // 2q37.3 // 51052 /// ENST0000	PRLH	NM_015893	0.450104	-2.22171	AA down vs CA
2409507	NM_201649 // SLC6A9 // solute carrier family 6 (neurotransmitter transporter, gl	SLC6A9	NM_201649	0.450684	-2.21885	AA down vs CA
3831975	NM_001172225 // ZNF540 // zinc finger protein 540 // 19q13.12 // 163255 /// NM_1	ZNF540	NM_001172225	0.451007	-2.21726	AA down vs CA
3527722	NM_002934 // RNASE2 // ribonuclease, RNase A family, 2 (liver, eosinophil-derive	RNASE2	NM_002934	0.452032	-2.21223	AA down vs CA
3078435	NM_004911 // PDIA4 // protein disulfide isomerase family A, member 4 // 7q35 //	PDIA4	NM_004911	2.21202	2.21202	AA up vs CA
2985497	NM_214462 // DACT2 // dapper, antagonist of beta-catenin, homolog 2 (Xenopus lae	DACT2	NM_214462	0.452978	-2.20761	AA down vs CA
3607447	NM_007011 // ABHD2 // abhydrolase domain containing 2 // 15q26.1 // 11057 /// NM	ABHD2	NM_007011	2.20431	2.20431	AA up vs CA
3579546	NM_004184 // WARS // tryptophanyl-tRNA synthetase // 14q32.31 // 7453 /// NM_173	WARS	NM_004184	2.20341	2.20341	AA up vs CA
2491271	NM_021103 // TMSB10 // thymosin beta 10 // 2p11.2 // 9168 /// ENST00000233143 //	TMSB10	NM_021103	2.19637	2.19637	AA up vs CA
3461164	NM_017440 // MDM1 // Mdm1 nuclear protein homolog (mouse) // 12q15 // 56890 ///	MDM1	NM_017440	0.455427	-2.19574	AA down vs CA
3299469	NM_144590 // ANKRD22 // ankyrin repeat domain 22 // 10q23.31 // 118932 /// ENST0	ANKRD22	NM_144590	2.1894	2.1894	AA up vs CA
2971139	NM_145062 // ZUFSP // zinc finger with UFM1-specific peptidase domain // 6q22.1	ZUFSP	NM_145062	0.457035	-2.18802	AA down vs CA
3527290	NM_001004723 // OR4N2 // olfactory receptor, family 4, subfamily N, member 2 //	OR4N2	NM_001004723	0.457131	-2.18756	AA down vs CA
2756309	NR_002451 // ABCA11P // ATP-binding cassette, sub-family A (ABC1), member 11 (ps	ABCA11P	NR_002451	0.457373	-2.1864	AA down vs CA
2938636	NM_001500 // GMDS // GDP-mannose 4,6-dehydratase // 6p25 // 2762 /// ENST0000038	GMDS	NM_001500	2.18445	2.18445	AA up vs CA
2902178	NM_007109 // TCF19 // transcription factor 19 // 6p21.3 // 6941 /// NM_001077511	TCF19	NM_007109	0.458478	-2.18113	AA down vs CA
3075932	NM_022750 // PARP12 // poly (ADP-ribose) polymerase family, member 12 // 7q34 //	PARP12	NM_022750	2.17609	2.17609	AA up vs CA
3746734	NM_145301 // FAM18B2 // family with sequence similarity 18, member B2 // 17p12 /	FAM18B2	NM_145301	0.459738	-2.17515	AA down vs CA
3450362	NM_198992 // SYT10 // synaptotagmin X // 12p11.1 // 341359 /// ENST00000228567 /	SYT10	NM_198992	0.461327	-2.16766	AA down vs CA
3062523	NM_005221 // DLX5 // distal-less homeobox 5 // 7q22 // 1749 /// ENST00000222598	DLX5	NM_005221	0.461371	-2.16745	AA down vs CA
3022465	NM_014390 // SND1 // staphylococcal nuclease and tudor domain containing 1 // 7q	SND1	NM_014390	2.16645	2.16645	AA up vs CA
3744150	NM_002616 // PER1 // period homolog 1 (Drosophila) // 17p13.1 // 5187 /// ENST00	PER1	NM_002616	0.461822	-2.16534	AA down vs CA
4005627	NM_144970 // CXorf38 // chromosome X open reading frame 38 // Xp11.4 // 159013 /	CXorf38	NM_144970	0.462172	-2.1637	AA down vs CA
2984275	NM_006661 // PDE10A // phosphodiesterase 10A // 6q26 // 10846 /// NM_001130690 /	PDE10A	NM_006661	0.462565	-2.16186	AA down vs CA
3203990	NM_020702 // KIAA1161 // KIAA1161 // 9p13.3 // 57462 /// ENST00000297625 // KIAA	KIAA1161	NM_020702	0.462814	-2.16069	AA down vs CA
2899372	NM_001145009 // BTN3A1 // butyrophilin, subfamily 3, member A1 // 6p22.1 // 1111	BTN3A1	NM_001145009	2.1595	2.1595	AA up vs CA
2323559	NM_016183 // MRTO4 // mRNA turnover 4 homolog (S. cerevisiae) // 1p36.13 // 5115	MRTO4	NM_016183	2.15853	2.15853	AA up vs CA
2902574	NM_021221 // LY6G5B // lymphocyte antigen 6 complex, locus G5B // 6p21.3 // 5849	LY6G5B	NM_021221	0.463539	-2.15732	AA down vs CA
3737647	NM_024591 // CHMP6 // chromatin modifying protein 6 // 17q25.3 // 79643 /// ENST	CHMP6	NM_024591	2.15305	2.15305	AA up vs CA
3995254	NM_018558 // GABRQ // gamma-aminobutyric acid (GABA) receptor, theta // Xq28 //	GABRQ	NM_018558	0.464542	-2.15266	AA down vs CA
3375147	NM_017966 // VPS37C // vacuolar protein sorting 37 homolog C (S. cerevisiae) //	VPS37C	NM_017966	0.4647	-2.15193	AA down vs CA
3381965	NM_005472 // KCNE3 // potassium voltage-gated channel, Isk-related family, membe	KCNE3	NM_005472	0.46502	-2.15044	AA down vs CA
2656569	NM_016306 // DNAJB11 // DnaJ (Hsp40) homolog, subfamily B, member 11 // 3q27.3 /	DNAJB11	NM_016306	2.1501	2.1501	AA up vs CA
2329920	NM_178548 // TFAP2E // transcription factor AP-2 epsilon (activating enhancer bi	TFAP2E	NM_178548	0.465632	-2.14762	AA down vs CA
3771773	NM_001081461 // JMJD6 // jumonji domain containing 6 // 17q25 // 23210 /// NM_01	JMJD6	NM_001081461	0.465758	-2.14704	AA down vs CA
4023006	NM_007131 // ZNF75D // zinc finger protein 75D // Xq26.3 // 7626 /// NM_00118506	ZNF75D	NM_007131	0.466273	-2.14467	AA down vs CA
3608638	NM_014848 // SV2B // synaptic vesicle glycoprotein 2B // 15q26.1 // 9899 /// NM_	SV2B	NM_014848	0.467218	-2.14033	AA down vs CA
3906129	NM_052846 // EMILIN3 // elastin microfibril interfacer 3 // 20q12 // 90187 /// N	EMILIN3	NM_052846	0.46793	-2.13707	AA down vs CA
2592268	NM_007315 // STAT1 // signal transducer and activator of transcription 1, 91kDa	STAT1	NM_007315	2.13429	2.13429	AA up vs CA
2584904	NM_173512 // SLC38A11 // solute carrier family 38, member 11 // 2q24.3 // 151258	SLC38A11	NM_173512	2.12917	2.12917	AA up vs CA
4023907	NM_004114 // FGF13 // fibroblast growth factor 13 // Xq26.3 // 2258 /// NM_00113	FGF13	NM_004114	2.12783	2.12783	AA up vs CA
2791894	NM_020116 // FSTL5 // follistatin-like 5 // 4q32.3 // 56884 /// NM_001128427 //	FSTL5	NM_020116	0.471625	-2.12033	AA down vs CA
3337196	NM_007103 // NDUFV1 // NADH dehydrogenase (ubiquinone) flavoprotein 1, 51kDa //	NDUFV1	NM_007103	2.11849	2.11849	AA up vs CA
2434971	NM_000449 // RFX5 // regulatory factor X, 5 (influences HLA class II expression)	RFX5	NM_000449	2.11029	2.11029	AA up vs CA
2404930	AF258548 // C1orf91 // chromosome 1 open reading frame 91 // 1p36.11-p34.2 // 56	C1orf91	AF258548	0.474305	-2.10835	AA down vs CA
3249978	NM_152709 // STOX1 // storkhead box 1 // 10q22.1 // 219736 /// NM_001130161 // S	STOX1	NM_152709	0.474494	-2.10751	AA down vs CA
2560524	NM_001058 // TACR1 // tachykinin receptor 1 // 2p12 // 6869 /// NM_015727 // TAC	TACR1	NM_001058	0.474521	-2.10739	AA down vs CA
3538403	AK128037 // LRRC9 // leucine rich repeat containing 9 // 14q23.1 // 341883	LRRC9	AK128037	0.474539	-2.10731	AA down vs CA
2773958	NM_001565 // CXCL10 // chemokine (C-X-C motif) ligand 10 // 4q21 // 3627 /// ENS	CXCL10	NM_001565	2.10588	2.10588	AA up vs CA
2624074	NM_206825 // GNL3 // guanine nucleotide binding protein-like 3 (nucleolar) // 3p	GNL3	NM_206825	2.10224	2.10224	AA up vs CA
3708160	NM_000697 // ALOX12 // arachidonate 12-lipoxygenase // 17p13.1 // 239 /// ENST00	ALOX12	NM_000697	0.475845	-2.10152	AA down vs CA
3867264	NM_001217 // CA11 // carbonic anhydrase XI // 19q13.3 // 770 /// ENST00000084798	CA11	NM_001217	0.476044	-2.10065	AA down vs CA
3399456	NM_014987 // IGSF9B // immunoglobulin superfamily, member 9B // 11q25 // 22997 /	IGSF9B	NM_014987	0.476261	-2.09969	AA down vs CA
3775038	NM_001193653 // C17orf62 // chromosome 17 open reading frame 62 // 17q25.3 // 79	C17orf62	NM_001193653	2.0995	2.0995	AA up vs CA
2360818	NM_020897 // HCN3 // hyperpolarization activated cyclic nucleotide-gated potassi	HCN3	NM_020897	0.476304	-2.0995	AA down vs CA
2365958	NM_003953 // MPZL1 // myelin protein zero-like 1 // 1q24.2 // 9019 /// NM_024569	MPZL1	NM_003953	2.09743	2.09743	AA up vs CA
2658785	NM_153690 // FAM43A // family with sequence similarity 43, member A // 3q29 // 1	FAM43A	NM_153690	0.477142	-2.09581	AA down vs CA
3856646	NM_007153 // ZNF208 // zinc finger protein 208 // 19p12 // 7757 /// NM_007153 //	ZNF208	NM_007153	0.477327	-2.095	AA down vs CA
2643324	NM_021203 // SRPRB // signal recognition particle receptor, B subunit // 3q22.1	SRPRB	NM_021203	2.09475	2.09475	AA up vs CA
2366581	ENST00000367772 // SCYL3 // SCY1-like 3 (S. cerevisiae) // 1q24.2 // 57147 /// B	SCYL3	ENST00000367772	0.47741	-2.09464	AA down vs CA
2843163	NM_001004106 // GRK6 // G protein-coupled receptor kinase 6 // 5q35 // 2870 ///	GRK6	NM_001004106	2.08964	2.08964	AA up vs CA
3065601	NR_027768 // DPY19L2P2 // dpy-19-like 2 pseudogene 2 (C. elegans) // 7q22.1 // 3	DPY19L2P2	NR_027768	0.478621	-2.08933	AA down vs CA
3192353	NM_032536 // NTNG2 // netrin G2 // 9q34 // 84628 /// ENST00000393229 // NTNG2 //	NTNG2	NM_032536	0.478669	-2.08913	AA down vs CA
2849588	AF370407 // LOC100128508 // PP12100 // 5p15.2 // 100128508 /// XM_003118526 // L	LOC100128508	AF370407	0.478974	-2.0878	AA down vs CA
3384718	NM_001364 // DLG2 // discs, large homolog 2 (Drosophila) // 11q14.1 // 1740 ///	DLG2	NM_001364	0.479105	-2.08723	AA down vs CA
2805078	NM_004932 // CDH6 // cadherin 6, type 2, K-cadherin (fetal kidney) // 5p13.3 //	CDH6	NM_004932	0.481073	-2.07869	AA down vs CA
2957462	NM_001512 // GSTA4 // glutathione S-transferase alpha 4 // 6p12.1 // 2941 /// EN	GSTA4	NM_001512	2.07798	2.07798	AA up vs CA
2623308	NM_000839 // GRM2 // glutamate receptor, metabotropic 2 // 3p21.2 // 2912 /// NM	GRM2	NM_000839	0.481901	-2.07512	AA down vs CA
3418298	AF063608 // KIF5A // kinesin family member 5A // 12q13.13 // 3798 /// BC051752 /	KIF5A	AF063608	0.484328	-2.06471	AA down vs CA
2875348	NM_002198 // IRF1 // interferon regulatory factor 1 // 5q31.1 // 3659 /// ENST00	IRF1	NM_002198	2.06175	2.06175	AA up vs CA
3844152	NM_014347 // ZNF324 // zinc finger protein 324 // 19q13.43 // 25799 /// NM_20739	ZNF324	NM_014347	0.485105	-2.06141	AA down vs CA
3984536	NM_001325 // CSTF2 // cleavage stimulation factor, 3' pre-RNA, subunit 2, 64kDa	CSTF2	NM_001325	2.06139	2.06139	AA up vs CA
3007960	NM_001305 // CLDN4 // claudin 4 // 7q11.23 // 1364 /// ENST00000435050 // CLDN4	CLDN4	NM_001305	2.06052	2.06052	AA up vs CA
2643592	NM_004441 // EPHB1 // EPH receptor B1 // 3q21-q23 // 2047 /// ENST00000398015 //	EPHB1	NM_004441	0.485609	-2.05927	AA down vs CA
2920475	NM_001455 // FOXO3 // forkhead box O3 // 6q21 // 2309 /// NM_201559 // FOXO3 //	FOXO3	NM_001455	0.485893	-2.05806	AA down vs CA
3293762	NM_002778 // PSAP // prosaposin // 10q21-q22 // 5660 /// NM_001042465 // PSAP //	PSAP	NM_002778	2.05758	2.05758	AA up vs CA
2600155	NM_012100 // DNPEP // aspartyl aminopeptidase // 2q35 // 23549 /// ENST000002730	DNPEP	NM_012100	2.05535	2.05535	AA up vs CA
2747314	NM_006439 // MAB21L2 // mab-21-like 2 (C. elegans) // 4q31 // 10586 /// ENST0000	MAB21L2	NM_006439	0.486574	-2.05518	AA down vs CA
3867346	NM_017805 // RASIP1 // Ras interacting protein 1 // 19q13.33 // 54922 /// ENST00	RASIP1	NM_017805	0.486645	-2.05488	AA down vs CA
2617563	NM_001172567 // MYD88 // myeloid differentiation primary response gene (88) // 3	MYD88	NM_001172567	2.05457	2.05457	AA up vs CA
3464405	NM_005447 // RASSF9 // Ras association (RalGDS/AF-6) domain family (N-terminal)	RASSF9	NM_005447	0.48681	-2.05419	AA down vs CA
3556966	NM_001166269 // HAUS4 // HAUS augmin-like complex, subunit 4 // 14q11.2 // 54930	HAUS4	NM_001166269	2.0538	2.0538	AA up vs CA
3484895	NM_004795 // KL // klotho // 13q12 // 9365 /// ENST00000380099 // KL // klotho /	KL	NM_004795	0.486938	-2.05365	AA down vs CA
2540317	NM_005742 // PDIA6 // protein disulfide isomerase family A, member 6 // 2p25.1 /	PDIA6	NM_005742	2.05359	2.05359	AA up vs CA
2331857	NM_022733 // SMAP2 // small ArfGAP2 // 1p35.3-p34.1 // 64744 /// ENST00000372718	SMAP2	NM_022733	2.0521	2.0521	AA up vs CA
3794341	ENST00000405150 // FLJ44313 // FLJ44313 protein // 18q23 // 400658 /// AK126293	FLJ44313	ENST00000405150	0.488033	-2.04904	AA down vs CA
3228463	NM_006266 // RALGDS // ral guanine nucleotide dissociation stimulator // 9q34.3	RALGDS	NM_006266	2.04717	2.04717	AA up vs CA
3293244	NM_001142648 // SAR1A // SAR1 homolog A (S. cerevisiae) // 10q22.1 // 56681 ///	SAR1A	NM_001142648	2.04573	2.04573	AA up vs CA
3042730	NM_005522 // HOXA1 // homeobox A1 // 7p15.3 // 3198 /// NM_153620 // HOXA1 // ho	HOXA1	NM_005522	0.489094	-2.0446	AA down vs CA
2746024	NM_002940 // ABCE1 // ATP-binding cassette, sub-family E (OABP), member 1 // 4q3	ABCE1	NM_002940	2.04402	2.04402	AA up vs CA
2439303	---		---	0.489301	-2.04373	AA down vs CA
2531983	NM_152614 // C2orf57 // chromosome 2 open reading frame 57 // 2q37.1 // 165100 /	C2orf57	NM_152614	0.489777	-2.04175	AA down vs CA
2506903	NM_002410 // MGAT5 // mannosyl (alpha-1,6-)-glycoprotein beta-1,6-N-acetyl-gluco	MGAT5	NM_002410	2.04054	2.04054	AA up vs CA
2457842	NM_005426 // TP53BP2 // tumor protein p53 binding protein, 2 // 1q42.1 // 7159 /	TP53BP2	NM_005426	2.03896	2.03896	AA up vs CA
2774817	NM_001040202 // PAQR3 // progestin and adipoQ receptor family member III // 4q21	PAQR3	NM_001040202	0.490484	-2.0388	AA down vs CA
2516023	NM_031942 // CDCA7 // cell division cycle associated 7 // 2q31 // 83879 /// NM_1	CDCA7	NM_031942	0.490516	-2.03867	AA down vs CA
3227634	NM_013318 // BAT2L1 // HLA-B associated transcript 2-like 1 // 9q34.13 // 84726	BAT2L1	NM_013318	0.490527	-2.03862	AA down vs CA
2756831	NM_213613 // SLC26A1 // solute carrier family 26 (sulfate transporter), member 1	SLC26A1	NM_213613	0.4908	-2.03749	AA down vs CA
2638962	NM_138287 // DTX3L // deltex 3-like (Drosophila) // 3q21.1 // 151636 /// ENST000	DTX3L	NM_138287	2.03665	2.03665	AA up vs CA
3402039	NM_002234 // KCNA5 // potassium voltage-gated channel, shaker-related subfamily,	KCNA5	NM_002234	0.491009	-2.03662	AA down vs CA
3014347	NM_002523 // NPTX2 // neuronal pentraxin II // 7q21.3-q22.1 // 4885 /// ENST0000	NPTX2	NM_002523	0.491241	-2.03566	AA down vs CA
2318257	NM_031475 // ESPN // espin // 1p36.31 // 83715 /// NR_026567 // ESPNP // espin p	ESPN	NM_031475	0.491551	-2.03438	AA down vs CA
2322211	ENST00000329454 // C1orf64 // chromosome 1 open reading frame 64 // 1p36.13 // 1	C1orf64	ENST00000329454	2.03275	2.03275	AA up vs CA
2948587	NM_005803 // FLOT1 // flotillin 1 // 6p21.3 // 10211 /// ENST00000376389 // FLOT	FLOT1	NM_005803	2.03253	2.03253	AA up vs CA
2593013	NM_018897 // DNAH7 // dynein, axonemal, heavy chain 7 // 2q32.3 // 56171 /// ENS	DNAH7	NM_018897	0.493207	-2.02755	AA down vs CA
3055765	NM_178125 // TRIM50 // tripartite motif-containing 50 // 7q11.23 // 135892 /// N	TRIM50	NM_178125	0.493628	-2.02582	AA down vs CA
2577700	NM_032143 // ZRANB3 // zinc finger, RAN-binding domain containing 3 // 2q21.3 //	ZRANB3	NM_032143	0.49369	-2.02556	AA down vs CA
2629782	NM_018029 // EBLN2 // endogenous Borna-like N element-2 // 3p13 // 55096 /// AY0	EBLN2	NM_018029	0.493999	-2.0243	AA down vs CA
2489172	NR_027405 // MTHFD2 // methylenetetrahydrofolate dehydrogenase (NADP+ dependent)	MTHFD2	NR_027405	2.02319	2.02319	AA up vs CA
3774701	NM_198082 // CCDC57 // coiled-coil domain containing 57 // 17q25.3 // 284001 ///	CCDC57	NM_198082	0.49449	-2.02228	AA down vs CA
3959185	---		---	0.495155	-2.01957	AA down vs CA
4029152	NR_028062 // PRKY // protein kinase, Y-linked // Yp11.2 // 5616 /// BC074851 //	PRKY	NR_028062	0.495313	-2.01892	AA down vs CA
3818468	NM_003811 // TNFSF9 // tumor necrosis factor (ligand) superfamily, member 9 // 1	TNFSF9	NM_003811	0.495732	-2.01722	AA down vs CA
2844453	---		---	0.495824	-2.01684	AA down vs CA
3753452	NM_001014445 // NLE1 // notchless homolog 1 (Drosophila) // 17q12 // 54475 /// N	NLE1	NM_001014445	2.01533	2.01533	AA up vs CA
3663181	NM_014157 // CCDC113 // coiled-coil domain containing 113 // 16q21 // 29070 ///	CCDC113	NM_014157	0.496443	-2.01433	AA down vs CA
2734352	AY250185 // NCRNA00247 // non-protein coding RNA 247 // 4q21.3 // 404201 /// NR_	NCRNA00247	AY250185	0.496707	-2.01326	AA down vs CA
2922732	NM_153036 // FAM26D // family with sequence similarity 26, member D // 6q22.1 //	FAM26D	NM_153036	0.496825	-2.01278	AA down vs CA
3691906	NM_025134 // CHD9 // chromodomain helicase DNA binding protein 9 // 16q12.2 // 8	CHD9	NM_025134	0.496843	-2.01271	AA down vs CA
3294476	NM_001024593 // ZMYND17 // zinc finger, MYND-type containing 17 // 10q22.2 // 11	ZMYND17	NM_001024593	0.496911	-2.01243	AA down vs CA
3028977	NM_001143679 // GSTK1 // glutathione S-transferase kappa 1 // 7q35 // 373156 ///	GSTK1	NM_001143679	2.01184	2.01184	AA up vs CA
3311546	AK097855 // FLJ40536 // FLJ40536 protein // 10q26.13 // 399819	FLJ40536	AK097855	0.497632	-2.00952	AA down vs CA
3510542	AF463496 // LOC445341 // TRAFs and NIK-associated protein // --- // 445341	LOC445341	AF463496	0.497712	-2.00919	AA down vs CA
2497082	NM_016232 // IL1RL1 // interleukin 1 receptor-like 1 // 2q12 // 9173 /// NM_0038	IL1RL1	NM_016232	0.497742	-2.00907	AA down vs CA
2545750	NM_001034116 // EIF2B4 // eukaryotic translation initiation factor 2B, subunit 4	EIF2B4	NM_001034116	2.00879	2.00879	AA up vs CA
2835213	NM_133263 // PPARGC1B // peroxisome proliferator-activated receptor gamma, coact	PPARGC1B	NM_133263	0.49783	-2.00872	AA down vs CA
3675020	NM_183337 // RGS11 // regulator of G-protein signaling 11 // 16p13.3 // 8786 ///	RGS11	NM_183337	0.497891	-2.00847	AA down vs CA
3023060	NM_001219 // CALU // calumenin // 7q32.1 // 813 /// NM_001130674 // CALU // calu	CALU	NM_001219	2.00796	2.00796	AA up vs CA
2991150	NM_014399 // TSPAN13 // tetraspanin 13 // 7p21.1 // 27075 /// ENST00000262067 //	TSPAN13	NM_014399	2.00736	2.00736	AA up vs CA
3619400	NM_207380 // C15orf52 // chromosome 15 open reading frame 52 // 15q15.1 // 38811	C15orf52	NM_207380	0.498183	-2.00729	AA down vs CA
2780999	NM_005443 // PAPSS1 // 3'-phosphoadenosine 5'-phosphosulfate synthase 1 // 4q24	PAPSS1	NM_005443	2.00726	2.00726	AA up vs CA
2855818	NM_004465 // FGF10 // fibroblast growth factor 10 // 5p13-p12 // 2255 /// ENST00	FGF10	NM_004465	0.498677	-2.0053	AA down vs CA
3042756	NM_006735 // HOXA2 // homeobox A2 // 7p15.2 // 3199 /// ENST00000222718 // HOXA2	HOXA2	NM_006735	0.498919	-2.00433	AA down vs CA
2965739	NM_198468 // MMS22L // MMS22-like, DNA repair protein // 6q16.1 // 253714 /// EN	MMS22L	NM_198468	0.499021	-2.00393	AA down vs CA
3393200	NM_004716 // PCSK7 // proprotein convertase subtilisin/kexin type 7 // 11q23-q24	PCSK7	NM_004716	2.00378	2.00378	AA up vs CA
3824124	NM_024578 // OCEL1 // occludin/ELL domain containing 1 // 19p13.11 // 79629 ///	OCEL1	NM_024578	0.499065	-2.00375	AA down vs CA
2844203	NM_001746 // CANX // calnexin // 5q35 // 821 /// NM_001024649 // CANX // calnexi	CANX	NM_001746	2.003	2.003	AA up vs CA
2417500	NM_000329 // RPE65 // retinal pigment epithelium-specific protein 65kDa // 1p31	RPE65	NM_000329	0.499455	-2.00218	AA down vs CA
3393796	---		---	0.499715	-2.00114	AA down vs CA
3669092	NM_018975 // TERF2IP // telomeric repeat binding factor 2, interacting protein /	TERF2IP	NM_018975	2.00056	2.00056	AA up vs CA
3643100	NM_053284 // WFIKKN1 // WAP, follistatin/kazal, immunoglobulin, kunitz and netri	WFIKKN1	NM_053284	0.500119	-1.99952	AA down vs CA
2536965	AK095698 // FLJ38379 // hypothetical FLJ38379 // 2q37.3 // 285097 /// AK126530 /	FLJ38379	AK095698	0.500194	-1.99923	AA down vs CA
3923354	NM_020132 // AGPAT3 // 1-acylglycerol-3-phosphate O-acyltransferase 3 // 21q22.3	AGPAT3	NM_020132	1.99894	1.99894	AA up vs CA
3602634	NM_145805 // ISL2 // ISL LIM homeobox 2 // 15q23 // 64843 /// ENST00000290759 //	ISL2	NM_145805	0.500625	-1.9975	AA down vs CA
3729002	NM_018149 // C17orf71 // chromosome 17 open reading frame 71 // 17q22 // 55181 /	C17orf71	NM_018149	1.9963	1.9963	AA up vs CA
3888383	NM_015266 // SLC9A8 // solute carrier family 9 (sodium/hydrogen exchanger), memb	SLC9A8	NM_015266	0.500941	-1.99624	AA down vs CA
2520429	NM_001130158 // MYO1B // myosin IB // 2q12-q34 // 4430 /// NM_001161819 // MYO1B	MYO1B	NM_001130158	1.99584	1.99584	AA up vs CA
2941721	NM_017770 // ELOVL2 // elongation of very long chain fatty acids (FEN1/Elo2, SUR	ELOVL2	NM_017770	1.99343	1.99343	AA up vs CA
2796623	NR_003542 // SLED1 // proteoglycan 3 pseudogene // 4q35.1 // 643036 /// AY358224	SLED1	NR_003542	0.501799	-1.99283	AA down vs CA
4000370	NM_001018113 // FANCB // Fanconi anemia, complementation group B // Xp22.2 // 21	FANCB	NM_001018113	0.501811	-1.99278	AA down vs CA
2705706	NM_003810 // TNFSF10 // tumor necrosis factor (ligand) superfamily, member 10 //	TNFSF10	NM_003810	1.99256	1.99256	AA up vs CA
3866831	NM_019855 // CABP5 // calcium binding protein 5 // 19q13.33 // 56344 /// ENST000	CABP5	NM_019855	0.502001	-1.99203	AA down vs CA
2758076	NM_003703 // NOP14 // NOP14 nucleolar protein homolog (yeast) // 4p16.3 // 8602	NOP14	NM_003703	1.99178	1.99178	AA up vs CA
3786920	NM_213602 // SIGLEC15 // sialic acid binding Ig-like lectin 15 // 18q12.3 // 284	SIGLEC15	NM_213602	0.502092	-1.99167	AA down vs CA
3153633	NR_002765 // ASAP1-IT // ASAP1 intronic transcript (non-protein coding) // 8q24.	ASAP1-IT	NR_002765	0.50212	-1.99156	AA down vs CA
2489385	NM_016170 // TLX2 // T-cell leukemia homeobox 2 // 2p13.1 // 3196 /// ENST000002	TLX2	NM_016170	0.502294	-1.99087	AA down vs CA
2950885	NM_002418 // MLN // motilin // 6p21.3 // 4295 /// NM_001040109 // MLN // motilin	MLN	NM_002418	0.502893	-1.98849	AA down vs CA
2730746	NM_001098484 // SLC4A4 // solute carrier family 4, sodium bicarbonate cotranspor	SLC4A4	NM_001098484	1.9877	1.9877	AA up vs CA
3874249	NM_033453 // ITPA // inosine triphosphatase (nucleoside triphosphate pyrophospha	ITPA	NM_033453	1.98751	1.98751	AA up vs CA
2463567	NM_152666 // PLD5 // phospholipase D family, member 5 // 1q43 // 200150 /// NM_0	PLD5	NM_152666	0.503147	-1.98749	AA down vs CA
3584728	BC043194 // SNRPN // small nuclear ribonucleoprotein polypeptide N // 15q11.2 //	SNRPN	BC043194	0.5035	-1.9861	AA down vs CA
3365203	NM_004179 // TPH1 // tryptophan hydroxylase 1 // 11p15.3-p14 // 7166 /// ENST000	TPH1	NM_004179	0.503675	-1.98541	AA down vs CA
3028636	ENST00000426318 // TRBV10-2 // T cell receptor beta variable 10-2 // 7q34 // 285	TRBV10-2	ENST00000426318	0.503745	-1.98513	AA down vs CA
3565524	NM_000161 // GCH1 // GTP cyclohydrolase 1 // 14q22.1-q22.2 // 2643 /// NM_001024	GCH1	NM_000161	1.98462	1.98462	AA up vs CA
2989764	NM_152745 // NXPH1 // neurexophilin 1 // 7p22 // 30010 /// ENST00000405863 // NX	NXPH1	NM_152745	0.504	-1.98413	AA down vs CA
4008972	NM_014138 // FAM156A // family with sequence similarity 156, member A // Xp11.22	FAM156A	NM_014138	0.504111	-1.98369	AA down vs CA
3606981	NR_026869 // NCRNA00052 // non-protein coding RNA 52 // 15q25.3 // 145978	NCRNA00052	NR_026869	0.50442	-1.98248	AA down vs CA
3591963	NM_003758 // EIF3J // eukaryotic translation initiation factor 3, subunit J // 1	EIF3J	NM_003758	1.98156	1.98156	AA up vs CA
2318656	NM_016831 // PER3 // period homolog 3 (Drosophila) // 1p36.23 // 8863 /// ENST00	PER3	NM_016831	0.505091	-1.97984	AA down vs CA
3872849	NM_198458 // ZNF497 // zinc finger protein 497 // 19q13.43 // 162968 /// ENST000	ZNF497	NM_198458	0.50524	-1.97926	AA down vs CA
2671640	NM_001135179 // ZDHHC3 // zinc finger, DHHC-type containing 3 // 3p21.31 // 5130	ZDHHC3	NM_001135179	0.505413	-1.97858	AA down vs CA
2318416	NM_138350 // THAP3 // THAP domain containing, apoptosis associated protein 3 //	THAP3	NM_138350	0.505427	-1.97853	AA down vs CA
2391647	NM_014188 // SSU72 // SSU72 RNA polymerase II CTD phosphatase homolog (S. cerevi	SSU72	NM_014188	1.97762	1.97762	AA up vs CA
3766716	NM_018469 // TEX2 // testis expressed 2 // 17q23.3 // 55852 /// ENST00000258991	TEX2	NM_018469	1.97703	1.97703	AA up vs CA
2998638	NM_001193311 // C7orf10 // chromosome 7 open reading frame 10 // 7p14.1 // 79783	C7orf10	NM_001193311	0.506564	-1.97408	AA down vs CA
3976120	NR_024616 // INE1 // inactivation escape 1 (non-protein coding) // Xp11.4-p11.3	INE1	NR_024616	0.506692	-1.97358	AA down vs CA
2384375	NR_002834 // DUSP5P // dual specificity phosphatase 5 pseudogene // 1q42.13 // 5	DUSP5P	NR_002834	0.506716	-1.97349	AA down vs CA
2461891	NM_152490 // B3GALNT2 // beta-1,3-N-acetylgalactosaminyltransferase 2 // 1q42.3	B3GALNT2	NM_152490	1.97338	1.97338	AA up vs CA
3529701	NM_006084 // IRF9 // interferon regulatory factor 9 // 14q11.2 // 10379 /// ENST	IRF9	NM_006084	1.97336	1.97336	AA up vs CA
2513925	NM_020981 // B3GALT1 // UDP-Gal:betaGlcNAc beta 1,3-galactosyltransferase, polyp	B3GALT1	NM_020981	0.506853	-1.97296	AA down vs CA
3803500	NM_001105528 // C18orf34 // chromosome 18 open reading frame 34 // 18q12.1 // 37	C18orf34	NM_001105528	0.506935	-1.97264	AA down vs CA
3381150	NR_026572 // PDE2A // phosphodiesterase 2A, cGMP-stimulated // 11q13.4 // 5138 /	PDE2A	NR_026572	0.507112	-1.97195	AA down vs CA
3674500	---		---	0.507318	-1.97115	AA down vs CA
3221598	NM_001012361 // WDR31 // WD repeat domain 31 // 9q32 // 114987 /// NM_145241 //	WDR31	NM_001012361	0.508231	-1.96761	AA down vs CA
2831932	NM_006083 // IK // IK cytokine, down-regulator of HLA II // 2p15-p14|5q31.3 // 3	IK	NM_006083	1.96752	1.96752	AA up vs CA
3167553	NM_147162 // IL11RA // interleukin 11 receptor, alpha // 9p13 // 3590 /// NM_004	IL11RA	NM_147162	0.508675	-1.96589	AA down vs CA
2931970	NM_025107 // MYCT1 // myc target 1 // 6q25.2 // 80177 /// NM_002156 // HSPD1 //	MYCT1	NM_025107	0.508724	-1.9657	AA down vs CA
3359224	NM_005170 // ASCL2 // achaete-scute complex homolog 2 (Drosophila) // 11p15.5 //	ASCL2	NM_005170	0.508806	-1.96539	AA down vs CA
2601230	NM_003469 // SCG2 // secretogranin II // 2q35-q36 // 7857 /// ENST00000305409 //	SCG2	NM_003469	0.508967	-1.96477	AA down vs CA
3527514	NM_000270 // PNP // purine nucleoside phosphorylase // 14q13.1 // 4860 /// ENST0	PNP	NM_000270	1.96468	1.96468	AA up vs CA
2950561	NM_005452 // WDR46 // WD repeat domain 46 // 6p21.3 // 9277 /// NM_001164267 //	WDR46	NM_005452	1.96416	1.96416	AA up vs CA
3952566	NM_007098 // CLTCL1 // clathrin, heavy chain-like 1 // 22q11.2|22q11.21 // 8218	CLTCL1	NM_007098	0.509204	-1.96385	AA down vs CA
2427791	NM_024901 // DENND2D // DENN/MADD domain containing 2D // 1p13.3 // 79961 /// EN	DENND2D	NM_024901	1.96377	1.96377	AA up vs CA
4054612	AK096928 // FLJ39609 // similar to hCG1995469 // 1p36.33 // 100130417	FLJ39609	AK096928	0.509609	-1.96229	AA down vs CA
3063795	NM_024637 // GAL3ST4 // galactose-3-O-sulfotransferase 4 // 7q22.1 // 79690 ///	GAL3ST4	NM_024637	0.509647	-1.96214	AA down vs CA
3137875	NM_003878 // GGH // gamma-glutamyl hydrolase (conjugase, folylpolygammaglutamyl	GGH	NM_003878	0.509768	-1.96168	AA down vs CA
3776139	NM_006101 // NDC80 // NDC80 homolog, kinetochore complex component (S. cerevisia	NDC80	NM_006101	0.509802	-1.96155	AA down vs CA
2638077	NM_015900 // PLA1A // phospholipase A1 member A // 3q13.13-q13.2 // 51365 /// EN	PLA1A	NM_015900	1.96141	1.96141	AA up vs CA
3812426	NM_173630 // RTTN // rotatin // 18q22.2 // 25914 /// ENST00000255674 // RTTN //	RTTN	NM_173630	0.509905	-1.96115	AA down vs CA
3729237	---		---	0.510121	-1.96032	AA down vs CA
2436132	NM_004515 // ILF2 // interleukin enhancer binding factor 2, 45kDa // 1q21.3 // 3	ILF2	NM_004515	1.95938	1.95938	AA up vs CA
3320717	NM_014632 // MICAL2 // microtubule associated monoxygenase, calponin and LIM dom	MICAL2	NM_014632	1.95886	1.95886	AA up vs CA
3986412	XM_002346323 // LOC100293553 // protein L-Myc-2-like // --- // 100293553	LOC100293553	XM_002346323	0.510728	-1.95799	AA down vs CA
2599345	NM_001087 // AAMP // angio-associated, migratory cell protein // 2q35 // 14 ///	AAMP	NM_001087	1.95789	1.95789	AA up vs CA
2821041	NR_026936 // C5orf27 // chromosome 5 open reading frame 27 // 5q15 // 202299 ///	C5orf27	NR_026936	0.510836	-1.95757	AA down vs CA
2610056	NM_001193380 // IL17RE // interleukin 17 receptor E // 3p25.3 // 132014 /// NM_1	IL17RE	NM_001193380	0.511141	-1.95641	AA down vs CA
3095313	NM_020130 // C8orf4 // chromosome 8 open reading frame 4 // 8p11.2 // 56892 ///	C8orf4	NM_020130	1.95587	1.95587	AA up vs CA
3820443	NM_000201 // ICAM1 // intercellular adhesion molecule 1 // 19p13.3-p13.2 // 3383	ICAM1	NM_000201	1.95585	1.95585	AA up vs CA
2402914	NM_052943 // FAM46B // family with sequence similarity 46, member B // 1p36.11 /	FAM46B	NM_052943	0.511289	-1.95584	AA down vs CA
3846831	NM_001013706 // PLIN5 // perilipin 5 // 19p13.3 // 440503 /// NM_052972 // LRG1	PLIN5	NM_001013706	1.95576	1.95576	AA up vs CA
2675315	NM_001005505 // CACNA2D2 // calcium channel, voltage-dependent, alpha 2/delta su	CACNA2D2	NM_001005505	0.511328	-1.95569	AA down vs CA
2573326	NR_027181 // LOC84931 // hypothetical LOC84931 // 2q14.2 // 84931	LOC84931	NR_027181	0.511423	-1.95533	AA down vs CA
3335070	NM_006779 // CDC42EP2 // CDC42 effector protein (Rho GTPase binding) 2 // 11q13	CDC42EP2	NM_006779	0.511779	-1.95397	AA down vs CA
3620799	NM_173500 // TTBK2 // tau tubulin kinase 2 // 15q15.2 // 146057 /// ENST00000267	TTBK2	NM_173500	0.511938	-1.95336	AA down vs CA
2618620	NM_001248 // ENTPD3 // ectonucleoside triphosphate diphosphohydrolase 3 // 3p21.	ENTPD3	NM_001248	0.512328	-1.95187	AA down vs CA
2666807	NM_199347 // NEK10 // NIMA (never in mitosis gene a)- related kinase 10 // 3p24.	NEK10	NM_199347	0.512353	-1.95178	AA down vs CA
2714563	AK093135 // FLJ35816 // FLJ35816 protein // 4p16.3 // 401114 /// BC121811 // FLJ	FLJ35816	AK093135	0.512429	-1.95149	AA down vs CA
3471327	NM_001040107 // HVCN1 // hydrogen voltage-gated channel 1 // 12q24.11 // 84329 /	HVCN1	NM_001040107	0.512431	-1.95148	AA down vs CA
2902089	NM_080870 // DPCR1 // diffuse panbronchiolitis critical region 1 // 6p21.33 // 1	DPCR1	NM_080870	0.512508	-1.95119	AA down vs CA
2332481	NM_007102 // GUCA2B // guanylate cyclase activator 2B (uroguanylin) // 1p34-p33	GUCA2B	NM_007102	0.512609	-1.9508	AA down vs CA
3396107	NM_138961 // ESAM // endothelial cell adhesion molecule // 11q24.2 // 90952 ///	ESAM	NM_138961	0.51262	-1.95076	AA down vs CA
3361494	NM_153444 // OR5P2 // olfactory receptor, family 5, subfamily P, member 2 // 11p	OR5P2	NM_153444	0.512708	-1.95043	AA down vs CA
3950452	NM_001135101 // CRELD2 // cysteine-rich with EGF-like domains 2 // 22q13.33 // 7	CRELD2	NM_001135101	1.95018	1.95018	AA up vs CA
3844238	NM_005762 // TRIM28 // tripartite motif-containing 28 // 19q13.4 // 10155 /// EN	TRIM28	NM_005762	1.94769	1.94769	AA up vs CA
2720145	NM_015907 // LAP3 // leucine aminopeptidase 3 // 4p15.32 // 51056 /// ENST000002	LAP3	NM_015907	1.94732	1.94732	AA up vs CA
3018535	NM_018844 // BCAP29 // B-cell receptor-associated protein 29 // 7q22-q31 // 5597	BCAP29	NM_018844	1.9472	1.9472	AA up vs CA
2915420	NM_001170423 // PRSS35 // protease, serine, 35 // 6q14.2 // 167681 /// NM_153362	PRSS35	NM_001170423	0.513742	-1.9465	AA down vs CA
2987441	NM_001037283 // EIF3B // eukaryotic translation initiation factor 3, subunit B /	EIF3B	NM_001037283	1.94585	1.94585	AA up vs CA
2573232	NR_000034 // TMEM185B // transmembrane protein 185B (pseudogene) // 2q14.2 // 79	TMEM185B	NR_000034	1.94546	1.94546	AA up vs CA
3773932	NM_001614 // ACTG1 // actin, gamma 1 // 17q25 // 71 /// ENST00000331925 // ACTG1	ACTG1	NM_001614	1.94512	1.94512	AA up vs CA
3383046	BC071734 // RPS20P27 // ribosomal protein S20 pseudogene 27 // 11q14.1 // 729927	RPS20P27	BC071734	0.514133	-1.94502	AA down vs CA
3158190	---		---	1.94474	1.94474	AA up vs CA
2920085	NM_018013 // SOBP // sine oculis binding protein homolog (Drosophila) // 6q21 //	SOBP	NM_018013	0.514242	-1.94461	AA down vs CA
2602997	NM_152527 // SLC16A14 // solute carrier family 16, member 14 (monocarboxylic aci	SLC16A14	NM_152527	0.514336	-1.94425	AA down vs CA
2527895	NM_032726 // PLCD4 // phospholipase C, delta 4 // 2q35 // 84812 /// ENST00000450	PLCD4	NM_032726	0.514527	-1.94353	AA down vs CA
3120481	NM_174922 // ADCK5 // aarF domain containing kinase 5 // 8q24.3 // 203054 /// EN	ADCK5	NM_174922	0.514758	-1.94266	AA down vs CA
3849464	NM_001005192 // OR7G1 // olfactory receptor, family 7, subfamily G, member 1 //	OR7G1	NM_001005192	0.515148	-1.94119	AA down vs CA
2889486	NM_153373 // AGXT2L2 // alanine-glyoxylate aminotransferase 2-like 2 // 5q35.3 /	AGXT2L2	NM_153373	1.94113	1.94113	AA up vs CA
3779612	NM_001142405 // SLMO1 // slowmo homolog 1 (Drosophila) // 18p11.21 // 10650 ///	SLMO1	NM_001142405	0.515736	-1.93898	AA down vs CA
3146455	NM_015668 // RGS22 // regulator of G-protein signaling 22 // 8q22.2 // 26166 ///	RGS22	NM_015668	0.515896	-1.93838	AA down vs CA
2835960	NM_005754 // G3BP1 // GTPase activating protein (SH3 domain) binding protein 1 /	G3BP1	NM_005754	1.93803	1.93803	AA up vs CA
2407934	NM_001135653 // PABPC4 // poly(A) binding protein, cytoplasmic 4 (inducible form	PABPC4	NM_001135653	1.93766	1.93766	AA up vs CA
2595443	NM_018256 // WDR12 // WD repeat domain 12 // 2q33.2 // 55759 /// ENST00000261015	WDR12	NM_018256	1.93765	1.93765	AA up vs CA
2380991	NM_018060 // IARS2 // isoleucyl-tRNA synthetase 2, mitochondrial // 1q41 // 5569	IARS2	NM_018060	1.93754	1.93754	AA up vs CA
3223551	NM_001080497 // MEGF9 // multiple EGF-like-domains 9 // 9q32-q33.3 // 1955 /// E	MEGF9	NM_001080497	0.516234	-1.9371	AA down vs CA
2921374	NM_032194 // RPF2 // ribosome production factor 2 homolog (S. cerevisiae) // 6q2	RPF2	NM_032194	1.93703	1.93703	AA up vs CA
2633256	NM_006100 // ST3GAL6 // ST3 beta-galactoside alpha-2,3-sialyltransferase 6 // 3q	ST3GAL6	NM_006100	0.51635	-1.93667	AA down vs CA
2987578	NM_152558 // IQCE // IQ motif containing E // 7p22.3 // 23288 /// NM_001100390 /	IQCE	NM_152558	0.516449	-1.9363	AA down vs CA
3432438	NM_016816 // OAS1 // 2',5'-oligoadenylate synthetase 1, 40/46kDa // 12q24.1 // 4	OAS1	NM_016816	1.93468	1.93468	AA up vs CA
3320675	NM_015881 // DKK3 // dickkopf homolog 3 (Xenopus laevis) // 11p15.2 // 27122 ///	DKK3	NM_015881	0.517285	-1.93317	AA down vs CA
2888648	NM_001031677 // RAB24 // RAB24, member RAS oncogene family // 5q35.3 // 53917 //	RAB24	NM_001031677	1.93317	1.93317	AA up vs CA
3893849	NM_012469 // PRPF6 // PRP6 pre-mRNA processing factor 6 homolog (S. cerevisiae)	PRPF6	NM_012469	1.93288	1.93288	AA up vs CA
2662473	NM_207351 // PRRT3 // proline-rich transmembrane protein 3 // 3p25.3 // 285368 /	PRRT3	NM_207351	0.517547	-1.93219	AA down vs CA
2853885	NM_001190468 // GDNF // glial cell derived neurotrophic factor // 5p13.1-p12 //	GDNF	NM_001190468	0.517571	-1.9321	AA down vs CA
3846280	NM_001060 // TBXA2R // thromboxane A2 receptor // 19p13.3 // 6915 /// NM_201636	TBXA2R	NM_001060	0.517588	-1.93204	AA down vs CA
2778727	NM_174952 // C4orf37 // chromosome 4 open reading frame 37 // 4q22.3-q23 // 2855	C4orf37	NM_174952	0.517805	-1.93123	AA down vs CA
2949038	NM_004640 // BAT1 // HLA-B associated transcript 1 // 6p21.3 // 7919 /// NM_0805	BAT1	NM_004640	1.93111	1.93111	AA up vs CA
3086100	NM_002052 // GATA4 // GATA binding protein 4 // 8p23.1-p22 // 2626 /// ENST00000	GATA4	NM_002052	0.517957	-1.93066	AA down vs CA
3939277	NR_033408 // FBXW4P1 // F-box and WD repeat domain containing 4 pseudogene 1 //	FBXW4P1	NR_033408	0.517998	-1.93051	AA down vs CA
3415812	NM_001004304 // ZNF740 // zinc finger protein 740 // 12q13.13 // 283337 /// ENST	ZNF740	NM_001004304	1.93003	1.93003	AA up vs CA
3039791	NM_006408 // AGR2 // anterior gradient homolog 2 (Xenopus laevis) // 7p21.3 // 1	AGR2	NM_006408	1.92984	1.92984	AA up vs CA
2949294	NR_003673 // LY6G6E // lymphocyte antigen 6 complex, locus G6E // 6p21.3 // 7913	LY6G6E	NR_003673	0.518279	-1.92946	AA down vs CA
2659039	NM_001098516 // MUC20 // mucin 20, cell surface associated // 3q29 // 200958 ///	MUC20	NM_001098516	0.518755	-1.92769	AA down vs CA
2980258	NM_019041 // MTRF1L // mitochondrial translational release factor 1-like // 6q25	MTRF1L	NM_019041	0.518797	-1.92754	AA down vs CA
2328465	NM_006559 // KHDRBS1 // KH domain containing, RNA binding, signal transduction a	KHDRBS1	NM_006559	1.927	1.927	AA up vs CA
2527253	NM_000597 // IGFBP2 // insulin-like growth factor binding protein 2, 36kDa // 2q	IGFBP2	NM_000597	1.92683	1.92683	AA up vs CA
3740998	NM_018128 // TSR1 // TSR1, 20S rRNA accumulation, homolog (S. cerevisiae) // 17p	TSR1	NM_018128	1.92612	1.92612	AA up vs CA
3591365	NM_001159280 // ADAL // adenosine deaminase-like // 15q15.3 // 161823 /// NM_001	ADAL	NM_001159280	0.519484	-1.92499	AA down vs CA
2529782	NM_022915 // MRPL44 // mitochondrial ribosomal protein L44 // 2q36.1 // 65080 //	MRPL44	NM_022915	1.92478	1.92478	AA up vs CA
2501317	NR_015377 // LOC654433 // hypothetical LOC654433 // 2q13 // 654433 /// AK126431	LOC654433	NR_015377	0.519603	-1.92455	AA down vs CA
2598606	NM_018441 // PECR // peroxisomal trans-2-enoyl-CoA reductase // 2q35 // 55825 //	PECR	NM_018441	0.519702	-1.92418	AA down vs CA
3126087	NM_177924 // ASAH1 // N-acylsphingosine amidohydrolase (acid ceramidase) 1 // 8p	ASAH1	NM_177924	1.92416	1.92416	AA up vs CA
3353853	NM_001005197 // OR8D4 // olfactory receptor, family 8, subfamily D, member 4 //	OR8D4	NM_001005197	0.519874	-1.92354	AA down vs CA
3358425	NM_145886 // LRDD // leucine-rich repeats and death domain containing // 11p15.5	LRDD	NM_145886	0.519894	-1.92347	AA down vs CA
2821194	NM_001042440 // CAST // calpastatin // 5q15 // 831 /// NM_001190442 // CAST // c	CAST	NM_001042440	1.92338	1.92338	AA up vs CA
3647504	NM_000303 // PMM2 // phosphomannomutase 2 // 16p13 // 5373 /// ENST00000268261 /	PMM2	NM_000303	1.92297	1.92297	AA up vs CA
3005252	AL136837 // DKFZP434F142 // hypothetical DKFZp434F142 // 7q11.21 // 84214 /// XR	DKFZP434F142	AL136837	0.520258	-1.92212	AA down vs CA
3838947	NM_030973 // MED25 // mediator complex subunit 25 // 19q13.3 // 81857 /// ENST00	MED25	NM_030973	0.520424	-1.92151	AA down vs CA
3778772	NM_153000 // APCDD1 // adenomatosis polyposis coli down-regulated 1 // 18p11.22	APCDD1	NM_153000	0.520542	-1.92107	AA down vs CA
3403299	NM_001131025 // PEX5 // peroxisomal biogenesis factor 5 // 12p13.31 // 5830 ///	PEX5	NM_001131025	0.520564	-1.92099	AA down vs CA
2327572	NM_001193532 // RAB42 // RAB42, member RAS oncogene family // 1p35.3 // 115273 /	RAB42	NM_001193532	0.520633	-1.92074	AA down vs CA
2358092	NM_012113 // CA14 // carbonic anhydrase XIV // 1q21 // 23632 /// ENST00000369111	CA14	NM_012113	0.520666	-1.92062	AA down vs CA
3830825	BC110893 // C19orf55 // chromosome 19 open reading frame 55 // 19q13.12 // 14813	C19orf55	BC110893	0.520756	-1.92029	AA down vs CA
3735505	NM_001088 // AANAT // aralkylamine N-acetyltransferase // 17q25 // 15 /// NM_001	AANAT	NM_001088	0.520798	-1.92013	AA down vs CA
3452417	NM_018018 // SLC38A4 // solute carrier family 38, member 4 // 12q13 // 55089 ///	SLC38A4	NM_018018	0.52084	-1.91998	AA down vs CA
2644202	NM_144717 // IL20RB // interleukin 20 receptor beta // 3q22.3 // 53833 /// ENST0	IL20RB	NM_144717	0.520884	-1.91981	AA down vs CA
2318242	AY358179 // LOC100130071 // GSQS6193 // 1p36.31 // 100130071	LOC100130071	AY358179	0.521031	-1.91927	AA down vs CA
2375664	NM_006763 // BTG2 // BTG family, member 2 // 1q32 // 7832 /// ENST00000290551 //	BTG2	NM_006763	1.91906	1.91906	AA up vs CA
2811812	NM_181506 // LRRC70 // leucine rich repeat containing 70 // 5q12.1 // 100130733	LRRC70	NM_181506	0.52113	-1.91891	AA down vs CA
2460189	NM_024554 // PGBD5 // piggyBac transposable element derived 5 // 1q42.13 // 7960	PGBD5	NM_024554	0.522264	-1.91474	AA down vs CA
3221277	NM_003408 // ZFP37 // zinc finger protein 37 homolog (mouse) // 9q32 // 7539 ///	ZFP37	NM_003408	0.52233	-1.9145	AA down vs CA
3980643	NM_021120 // DLG3 // discs, large homolog 3 (Drosophila) // Xq13.1 // 1741 /// N	DLG3	NM_021120	1.91429	1.91429	AA up vs CA
3043606	NM_014817 // TRIL // TLR4 interactor with leucine-rich repeats // 7p14.3 // 9865	TRIL	NM_014817	0.522411	-1.9142	AA down vs CA
3238528	NM_012443 // SPAG6 // sperm associated antigen 6 // 10p12.2 // 9576 /// NM_17224	SPAG6	NM_012443	0.522566	-1.91363	AA down vs CA
2960774	NM_030568 // KHDC1 // KH homology domain containing 1 // 6q13 // 80759 /// NM_00	KHDC1	NM_030568	0.522968	-1.91216	AA down vs CA
2375916	NM_005686 // SOX13 // SRY (sex determining region Y)-box 13 // 1q32 // 9580 ///	SOX13	NM_005686	0.522982	-1.91211	AA down vs CA
2518583	NM_018981 // DNAJC10 // DnaJ (Hsp40) homolog, subfamily C, member 10 // 2q32.1 /	DNAJC10	NM_018981	1.91148	1.91148	AA up vs CA
2351233	NM_203412 // UBL4B // ubiquitin-like 4B // 1p13.3 // 164153 /// ENST00000334179	UBL4B	NM_203412	0.523158	-1.91147	AA down vs CA
2837266	NM_001037332 // CYFIP2 // cytoplasmic FMR1 interacting protein 2 // 5q33.3 // 26	CYFIP2	NM_001037332	1.91116	1.91116	AA up vs CA
2995491	NM_032222 // FAM188B // family with sequence similarity 188, member B // 7p14.3	FAM188B	NM_032222	0.523272	-1.91105	AA down vs CA
2951664	NM_001832 // CLPS // colipase, pancreatic // 6pter-p21.1 // 1208 /// ENST0000025	CLPS	NM_001832	0.523323	-1.91087	AA down vs CA
3441542	NM_020373 // ANO2 // anoctamin 2 // 12p13.3 // 57101 /// ENST00000327087 // ANO2	ANO2	NM_020373	0.523538	-1.91008	AA down vs CA
3755580	NM_199247 // CACNB1 // calcium channel, voltage-dependent, beta 1 subunit // 17q	CACNB1	NM_199247	0.523587	-1.9099	AA down vs CA
3186137	NM_000608 // ORM2 // orosomucoid 2 // 9q32 // 5005 /// NM_000607 // ORM1 // oros	ORM2	NM_000608	1.90949	1.90949	AA up vs CA
3490655	NM_018204 // CKAP2 // cytoskeleton associated protein 2 // 13q14 // 26586 /// NM	CKAP2	NM_018204	1.90944	1.90944	AA up vs CA
2825733	NM_000414 // HSD17B4 // hydroxysteroid (17-beta) dehydrogenase 4 // 5q21 // 3295	HSD17B4	NM_000414	1.90777	1.90777	AA up vs CA
2523419	NM_024744 // ALS2CR8 // amyotrophic lateral sclerosis 2 (juvenile) chromosome re	ALS2CR8	NM_024744	0.524211	-1.90763	AA down vs CA
3535752	NM_000953 // PTGDR // prostaglandin D2 receptor (DP) // 14q22.1 // 5729 /// ENST	PTGDR	NM_000953	0.524248	-1.90749	AA down vs CA
2880932	NM_001025105 // CSNK1A1 // casein kinase 1, alpha 1 // 5q32 // 1452 /// NM_00189	CSNK1A1	NM_001025105	1.90738	1.90738	AA up vs CA
3991814	NM_001170779 // FAM122C // family with sequence similarity 122C // Xq26.3 // 159	FAM122C	NM_001170779	0.524306	-1.90728	AA down vs CA
2406662	ENST00000312808 // C1orf113 // chromosome 1 open reading frame 113 // 1p34.3 //	C1orf113	ENST00000312808	0.524364	-1.90707	AA down vs CA
3442249	BC035736 // C12orf53 // chromosome 12 open reading frame 53 // 12p13.31 // 19650	C12orf53	BC035736	0.524375	-1.90703	AA down vs CA
2550790	NM_133259 // LRPPRC // leucine-rich PPR-motif containing // 2p21 // 10128 /// EN	LRPPRC	NM_133259	1.90584	1.90584	AA up vs CA
3860315	NM_001042474 // ZNF565 // zinc finger protein 565 // 19q13.12 // 147929 /// NM_1	ZNF565	NM_001042474	0.52514	-1.90425	AA down vs CA
2644333	NM_004189 // SOX14 // SRY (sex determining region Y)-box 14 // 3q22-q23 // 8403	SOX14	NM_004189	0.525369	-1.90342	AA down vs CA
2662657	NR_024272 // SEC13 // SEC13 homolog (S. cerevisiae) // 3p25-p24 // 6396 /// NR_0	SEC13	NR_024272	1.90337	1.90337	AA up vs CA
2673509	NM_003365 // UQCRC1 // ubiquinol-cytochrome c reductase core protein I // 3p21.3	UQCRC1	NM_003365	1.90322	1.90322	AA up vs CA
2544895	---		---	0.525488	-1.90299	AA down vs CA
3746675	NM_173622 // CDRT4 // CMT1A duplicated region transcript 4 // 17p12 // 284040 //	CDRT4	NM_173622	0.525493	-1.90298	AA down vs CA
3028001	NM_001001656 // OR9A4 // olfactory receptor, family 9, subfamily A, member 4 //	OR9A4	NM_001001656	0.525527	-1.90285	AA down vs CA
2751936	NM_017423 // GALNT7 // UDP-N-acetyl-alpha-D-galactosamine:polypeptide N-acetylga	GALNT7	NM_017423	1.90272	1.90272	AA up vs CA
2385659	NM_019090 // KIAA1383 // KIAA1383 // 1q42.2 // 54627 /// ENST00000418460 // KIAA	KIAA1383	NM_019090	0.525583	-1.90265	AA down vs CA
3776279	NM_032048 // EMILIN2 // elastin microfibril interfacer 2 // 18p11.3 // 84034 ///	EMILIN2	NM_032048	0.525662	-1.90236	AA down vs CA
3603295	NM_004378 // CRABP1 // cellular retinoic acid binding protein 1 // 15q24 // 1381	CRABP1	NM_004378	0.525663	-1.90236	AA down vs CA
3921933	NM_012105 // BACE2 // beta-site APP-cleaving enzyme 2 // 21q22.3 // 25825 /// NM	BACE2	NM_012105	1.90224	1.90224	AA up vs CA
2954176	NM_000322 // PRPH2 // peripherin 2 (retinal degeneration, slow) // 6p21.2-p12.3	PRPH2	NM_000322	0.525807	-1.90184	AA down vs CA
3066613	NM_152749 // ATXN7L1 // ataxin 7-like 1 // 7q22.3 // 222255 /// NM_020725 // ATX	ATXN7L1	NM_152749	0.525934	-1.90138	AA down vs CA
3753935	NM_020426 // LYZL6 // lysozyme-like 6 // 17q11.2 // 57151 /// ENST00000293274 //	LYZL6	NM_020426	0.525981	-1.90121	AA down vs CA
2433232	NM_001461 // FMO5 // flavin containing monooxygenase 5 // 1q21.1 // 2330 /// NM_	FMO5	NM_001461	1.90046	1.90046	AA up vs CA
3346412	NM_032930 // C11orf70 // chromosome 11 open reading frame 70 // 11q22.1 // 85016	C11orf70	NM_032930	0.526209	-1.90039	AA down vs CA
2434438	NM_021960 // MCL1 // myeloid cell leukemia sequence 1 (BCL2-related) // 1q21 //	MCL1	NM_021960	1.90031	1.90031	AA up vs CA
2942432	AF264036 // C6orf114 // chromosome 6 open reading frame 114 // 6p23 // 85411 ///	C6orf114	AF264036	0.526248	-1.90025	AA down vs CA
2394626	NM_007274 // ACOT7 // acyl-CoA thioesterase 7 // 1p36 // 11332 /// NM_181864 //	ACOT7	NM_007274	0.526283	-1.90012	AA down vs CA
2887930	AK131247 // FLJ16171 // FLJ16171 protein // 5q35.2 // 441116	FLJ16171	AK131247	0.526336	-1.89993	AA down vs CA
3286286	NM_004966 // HNRNPF // heterogeneous nuclear ribonucleoprotein F // 10q11.21 //	HNRNPF	NM_004966	1.89991	1.89991	AA up vs CA
3747703	---		---	0.526452	-1.89951	AA down vs CA
3553337	NM_145725 // TRAF3 // TNF receptor-associated factor 3 // 14q32.32 // 7187 /// N	TRAF3	NM_145725	1.89938	1.89938	AA up vs CA
2410111	NM_012222 // MUTYH // mutY homolog (E. coli) // 1p34.1 // 4595 /// NM_001128425	MUTYH	NM_012222	0.526699	-1.89862	AA down vs CA
3688178	NM_001172669 // ZNF668 // zinc finger protein 668 // 16p11.2 // 79759 /// NM_001	ZNF668	NM_001172669	0.526781	-1.89832	AA down vs CA
3062576	NM_133436 // ASNS // asparagine synthetase (glutamine-hydrolyzing) // 7q21.3 //	ASNS	NM_133436	1.89788	1.89788	AA up vs CA
3699757	NM_001130089 // KARS // lysyl-tRNA synthetase // 16q23.1 // 3735 /// NM_005548 /	KARS	NM_001130089	1.89775	1.89775	AA up vs CA
3821159	NM_022737 // LPPR2 // lipid phosphate phosphatase-related protein type 2 // 19p1	LPPR2	NM_022737	0.527053	-1.89734	AA down vs CA
2696109	NM_025041 // C3orf36 // chromosome 3 open reading frame 36 // 3q22.1 // 80111 //	C3orf36	NM_025041	0.52709	-1.89721	AA down vs CA
2413633	NM_001031672 // CYB5RL // cytochrome b5 reductase-like // 1p32.3 // 606495 /// N	CYB5RL	NM_001031672	0.527439	-1.89595	AA down vs CA
3461146	NM_020525 // IL22 // interleukin 22 // 12q15 // 50616 /// ENST00000328087 // IL2	IL22	NM_020525	0.527467	-1.89585	AA down vs CA
2408111	NM_017646 // TRIT1 // tRNA isopentenyltransferase 1 // 1p34.2 // 54802 /// ENST0	TRIT1	NM_017646	1.89567	1.89567	AA up vs CA
2950214	NM_000593 // TAP1 // transporter 1, ATP-binding cassette, sub-family B (MDR/TAP)	TAP1	NM_000593	1.89512	1.89512	AA up vs CA
3549381	NM_182971 // COX8C // cytochrome c oxidase subunit 8C // 14q32.12 // 341947 ///	COX8C	NM_182971	0.527688	-1.89506	AA down vs CA
2402883	NM_021969 // NR0B2 // nuclear receptor subfamily 0, group B, member 2 // 1p36.1	NR0B2	NM_021969	0.527755	-1.89482	AA down vs CA
2767972	NM_000807 // GABRA2 // gamma-aminobutyric acid (GABA) A receptor, alpha 2 // 4p1	GABRA2	NM_000807	0.527852	-1.89447	AA down vs CA
3835440	NM_013362 // ZNF225 // zinc finger protein 225 // 19q13.2 // 7768 /// AK292437 /	ZNF225	NM_013362	0.52802	-1.89387	AA down vs CA
2460296	NM_000029 // AGT // angiotensinogen (serpin peptidase inhibitor, clade A, member	AGT	NM_000029	0.528054	-1.89375	AA down vs CA
3645402	NM_032296 // FLYWCH1 // FLYWCH-type zinc finger 1 // 16p13.3 // 84256 /// NM_020	FLYWCH1	NM_032296	0.528138	-1.89344	AA down vs CA
2674242	NM_001664 // RHOA // ras homolog gene family, member A // 3p21.3 // 387 /// ENST	RHOA	NM_001664	1.89303	1.89303	AA up vs CA
2730404	NM_006685 // SMR3B // submaxillary gland androgen regulated protein 3B // 4q13.3	SMR3B	NM_006685	0.528374	-1.8926	AA down vs CA
3103703	NM_015886 // PI15 // peptidase inhibitor 15 // 8q21.11 // 51050 /// ENST00000260	PI15	NM_015886	1.89225	1.89225	AA up vs CA
2954355	NM_001168370 // CUL7 // cullin 7 // 6p21.1 // 9820 /// NM_014780 // CUL7 // cull	CUL7	NM_001168370	1.89215	1.89215	AA up vs CA
2402431	NM_178422 // PAQR7 // progestin and adipoQ receptor family member VII // 1p36.11	PAQR7	NM_178422	0.52865	-1.89161	AA down vs CA
2958117	NM_019036 // HMGCLL1 // 3-hydroxymethyl-3-methylglutaryl-CoA lyase-like 1 // 6p1	HMGCLL1	NM_019036	0.52895	-1.89054	AA down vs CA
2407191	NM_013285 // GNL2 // guanine nucleotide binding protein-like 2 (nucleolar) // 1p	GNL2	NM_013285	1.88925	1.88925	AA up vs CA
3227816	AF467069 // RAPGEF1 // Rap guanine nucleotide exchange factor (GEF) 1 // 9q34.3	RAPGEF1	AF467069	0.529367	-1.88905	AA down vs CA
2379665	NM_002763 // PROX1 // prospero homeobox 1 // 1q41 // 5629 /// ENST00000366958 //	PROX1	NM_002763	0.529378	-1.88901	AA down vs CA
4008915	NM_133179 // XAGE3 // X antigen family, member 3 // Xp11.22 // 170626 /// NM_130	XAGE3	NM_133179	1.88797	1.88797	AA up vs CA
3823752	NM_032207 // C19orf44 // chromosome 19 open reading frame 44 // 19p13.11 // 8416	C19orf44	NM_032207	0.529752	-1.88767	AA down vs CA
3329685	NM_005693 // NR1H3 // nuclear receptor subfamily 1, group H, member 3 // 11p11.2	NR1H3	NM_005693	1.88766	1.88766	AA up vs CA
2360677	NM_004428 // EFNA1 // ephrin-A1 // 1q21-q22 // 1942 /// NM_182685 // EFNA1 // ep	EFNA1	NM_004428	1.88766	1.88766	AA up vs CA
3820727	NM_031209 // QTRT1 // queuine tRNA-ribosyltransferase 1 // 19p13.3 // 81890 ///	QTRT1	NM_031209	1.88758	1.88758	AA up vs CA
3851250	NM_021143 // ZNF20 // zinc finger protein 20 // 19p13.2 // 7568 /// ENST00000334	ZNF20	NM_021143	0.529814	-1.88746	AA down vs CA
3862785	NM_198476 // C19orf54 // chromosome 19 open reading frame 54 // 19q13.2 // 28432	C19orf54	NM_198476	0.529986	-1.88684	AA down vs CA
2495881	NM_015904 // EIF5B // eukaryotic translation initiation factor 5B // 2q11.2 // 9	EIF5B	NM_015904	1.88661	1.88661	AA up vs CA
3456592	NM_014311 // SMUG1 // single-strand-selective monofunctional uracil-DNA glycosyl	SMUG1	NM_014311	1.88622	1.88622	AA up vs CA
2748605	NM_004744 // LRAT // lecithin retinol acyltransferase (phosphatidylcholine--reti	LRAT	NM_004744	0.530398	-1.88538	AA down vs CA
2560704	NM_003203 // C2orf3 // chromosome 2 open reading frame 3 // 2p11.2-p11.1 // 6936	C2orf3	NM_003203	1.88457	1.88457	AA up vs CA
2576608	BC043584 // C2orf27B // chromosome 2 open reading frame 27B // 2q21 // 408029 //	C2orf27B	BC043584	0.530633	-1.88454	AA down vs CA
2749191	NM_000824 // GLRB // glycine receptor, beta // 4q31.3 // 2743 /// NM_001166060 /	GLRB	NM_000824	0.530723	-1.88422	AA down vs CA
3048517	NM_001220 // CAMK2B // calcium/calmodulin-dependent protein kinase II beta // 22	CAMK2B	NM_001220	0.530929	-1.88349	AA down vs CA
2354082	NM_006784 // WDR3 // WD repeat domain 3 // 1p12 // 10885 /// ENST00000349139 //	WDR3	NM_006784	1.88343	1.88343	AA up vs CA
2408189	NM_000310 // PPT1 // palmitoyl-protein thioesterase 1 // 1p32 // 5538 /// NM_001	PPT1	NM_000310	1.88327	1.88327	AA up vs CA
2565143	NM_020151 // STARD7 // StAR-related lipid transfer (START) domain containing 7 /	STARD7	NM_020151	1.88302	1.88302	AA up vs CA
4006326	NM_025184 // EFHC2 // EF-hand domain (C-terminal) containing 2 // Xp11.3 // 8025	EFHC2	NM_025184	0.531408	-1.88179	AA down vs CA
2451567	NM_004997 // MYBPH // myosin binding protein H // 1q32.1 // 4608 /// ENST0000025	MYBPH	NM_004997	0.531785	-1.88046	AA down vs CA
3013255	NM_015068 // PEG10 // paternally expressed 10 // 7q21 // 23089 /// NM_001040152	PEG10	NM_015068	0.531873	-1.88015	AA down vs CA
2442911	NM_153832 // GPR161 // G protein-coupled receptor 161 // 1q24.2 // 23432 /// ENS	GPR161	NM_153832	0.531934	-1.87993	AA down vs CA
2584712	NM_004490 // GRB14 // growth factor receptor-bound protein 14 // 2q22-q24 // 288	GRB14	NM_004490	0.531983	-1.87976	AA down vs CA
3794641	NM_001480 // GALR1 // galanin receptor 1 // 18q23 // 2587 /// ENST00000299727 //	GALR1	NM_001480	0.532051	-1.87952	AA down vs CA
3159013	NM_030580 // ZNF34 // zinc finger protein 34 // 8q24.3 // 80778 /// ENST00000343	ZNF34	NM_030580	0.532076	-1.87943	AA down vs CA
3081707	NM_005515 // MNX1 // motor neuron and pancreas homeobox 1 // 7q36 // 3110 /// NM	MNX1	NM_005515	0.532081	-1.87941	AA down vs CA
3293998	NM_006077 // CBARA1 // calcium binding atopy-related autoantigen 1 // 10q22.1 //	CBARA1	NM_006077	1.87893	1.87893	AA up vs CA
2904836	NM_182548 // LHFPL5 // lipoma HMGIC fusion partner-like 5 // 6p21.31 // 222662 /	LHFPL5	NM_182548	0.532219	-1.87892	AA down vs CA
2548970	NM_001031684 // SRSF7 // serine/arginine-rich splicing factor 7 // 2p22.1 // 643	SRSF7	NM_001031684	1.87885	1.87885	AA up vs CA
2622590	NM_144499 // GNAT1 // guanine nucleotide binding protein (G protein), alpha tran	GNAT1	NM_144499	0.532338	-1.8785	AA down vs CA
2692816	NM_002213 // ITGB5 // integrin, beta 5 // 3q21.2 // 3693 /// ENST00000296181 //	ITGB5	NM_002213	1.87705	1.87705	AA up vs CA
2770242	NM_002703 // PPAT // phosphoribosyl pyrophosphate amidotransferase // 4q12 // 54	PPAT	NM_002703	1.87608	1.87608	AA up vs CA
3418214	NM_052897 // MBD6 // methyl-CpG binding domain protein 6 // --- // 114785 /// EN	MBD6	NM_052897	0.533086	-1.87587	AA down vs CA
3677538	NM_033208 // TIGD7 // tigger transposable element derived 7 // 16p13.3 // 91151	TIGD7	NM_033208	0.533159	-1.87561	AA down vs CA
3899173	NM_001042576 // RRBP1 // ribosome binding protein 1 homolog 180kDa (dog) // 20p1	RRBP1	NM_001042576	1.87536	1.87536	AA up vs CA
3843233	NM_006959 // ZNF17 // zinc finger protein 17 // 19q13.4 // 7565 /// NM_006959 //	ZNF17	NM_006959	0.533243	-1.87532	AA down vs CA
3972512	AK057304 // FLJ32742 // hypothetical locus FLJ32742 // Xp21.3 // 439944	FLJ32742	AK057304	0.533526	-1.87432	AA down vs CA
3755429	NM_000978 // RPL23 // ribosomal protein L23 // 17q // 9349 /// NR_002576 // SNOR	RPL23	NM_000978	1.8742	1.8742	AA up vs CA
3596263	NM_012182 // FOXB1 // forkhead box B1 // 15q22 // 27023 /// ENST00000396057 // F	FOXB1	NM_012182	0.53369	-1.87375	AA down vs CA
2395564	NM_003039 // SLC2A5 // solute carrier family 2 (facilitated glucose/fructose tra	SLC2A5	NM_003039	0.533719	-1.87364	AA down vs CA
2906749	NM_004828 // NCR2 // natural cytotoxicity triggering receptor 2 // 6p21.1 // 943	NCR2	NM_004828	0.533727	-1.87362	AA down vs CA
2784027	NM_001154 // ANXA5 // annexin A5 // 4q26-q28|4q27 // 308 /// ENST00000296511 //	ANXA5	NM_001154	1.87348	1.87348	AA up vs CA
3558418	NM_014178 // STXBP6 // syntaxin binding protein 6 (amisyn) // 14q12 // 29091 ///	STXBP6	NM_014178	1.87317	1.87317	AA up vs CA
3817040	NM_006339 // HMG20B // high-mobility group 20B // 19p13.3 // 10362 /// ENST00000	HMG20B	NM_006339	1.87288	1.87288	AA up vs CA
2969796	---		---	0.533994	-1.87268	AA down vs CA
2343473	NM_006820 // IFI44L // interferon-induced protein 44-like // 1p31.1 // 10964 ///	IFI44L	NM_006820	1.87256	1.87256	AA up vs CA
3095223	NM_002164 // IDO1 // indoleamine 2,3-dioxygenase 1 // 8p12-p11 // 3620 /// ENST0	IDO1	NM_002164	1.87232	1.87232	AA up vs CA
2534810	NM_015650 // TRAF3IP1 // TNF receptor-associated factor 3 interacting protein 1	TRAF3IP1	NM_015650	0.534315	-1.87156	AA down vs CA
2947877	NM_006398 // UBD // ubiquitin D // 6p21.3 // 10537 /// ENST00000377050 // UBD //	UBD	NM_006398	1.87137	1.87137	AA up vs CA
2532480	NM_025202 // EFHD1 // EF-hand domain family, member D1 // 2q37.1 // 80303 /// NR	EFHD1	NM_025202	0.534571	-1.87066	AA down vs CA
3397847	NM_022112 // TP53AIP1 // tumor protein p53 regulated apoptosis inducing protein	TP53AIP1	NM_022112	0.534917	-1.86945	AA down vs CA
2881370	NM_001025159 // CD74 // CD74 molecule, major histocompatibility complex, class I	CD74	NM_001025159	1.86916	1.86916	AA up vs CA
2726910	NM_145263 // SPATA18 // spermatogenesis associated 18 homolog (rat) // 4q12 // 1	SPATA18	NM_145263	0.535016	-1.8691	AA down vs CA
2957227	NM_012288 // TRAM2 // translocation associated membrane protein 2 // 6p21.1-p12	TRAM2	NM_012288	1.86901	1.86901	AA up vs CA
3434525	NM_014730 // MLEC // malectin // 12q24.31 // 9761 /// ENST00000228506 // MLEC //	MLEC	NM_014730	1.86891	1.86891	AA up vs CA
3360622	NM_033092 // TRIM5 // tripartite motif-containing 5 // 11p15 // 85363 /// NM_033	TRIM5	NM_033092	1.86889	1.86889	AA up vs CA
3072368	NM_016478 // ZC3HC1 // zinc finger, C3HC-type containing 1 // 7q32.2 // 51530 //	ZC3HC1	NM_016478	1.86887	1.86887	AA up vs CA
2523144	NM_015934 // NOP58 // NOP58 ribonucleoprotein homolog (yeast) // 2q33.1 // 51602	NOP58	NM_015934	1.8685	1.8685	AA up vs CA
2693654	BC032025 // C3orf22 // chromosome 3 open reading frame 22 // 3q21.3 // 152065 //	C3orf22	BC032025	0.535209	-1.86843	AA down vs CA
3261723	NM_024789 // TMEM180 // transmembrane protein 180 // 10q24.32 // 79847 /// ENST0	TMEM180	NM_024789	0.535239	-1.86832	AA down vs CA
2401533	---		---	0.535494	-1.86743	AA down vs CA
2802398	NM_007118 // TRIO // triple functional domain (PTPRF interacting) // 5p15.2 // 7	TRIO	NM_007118	1.86716	1.86716	AA up vs CA
2408477	NM_001168247 // SLFNL1 // schlafen-like 1 // 1p34.2 // 200172 /// NM_144990 // S	SLFNL1	NM_001168247	0.535616	-1.86701	AA down vs CA
3718682	NM_001030006 // AP2B1 // adaptor-related protein complex 2, beta 1 subunit // 17	AP2B1	NM_001030006	1.86686	1.86686	AA up vs CA
3336801	NM_001619 // ADRBK1 // adrenergic, beta, receptor kinase 1 // 11q13.1 // 156 ///	ADRBK1	NM_001619	1.86659	1.86659	AA up vs CA
2728938	NM_015236 // LPHN3 // latrophilin 3 // 4q13.1 // 23284 /// AK299651 // LPHN3 //	LPHN3	NM_015236	0.535975	-1.86576	AA down vs CA
3835035	NM_020406 // CD177 // CD177 molecule // 19q13.2 // 57126 /// ENST00000457794 //	CD177	NM_020406	0.535992	-1.8657	AA down vs CA
3057755	NM_012230 // POMZP3 // POM121 and ZP3 fusion // 7q11.23 // 22932 /// NM_152992 /	POMZP3	NM_012230	0.53601	-1.86564	AA down vs CA
3336117	NM_153266 // TMEM151A // transmembrane protein 151A // 11q13.2 // 256472 /// ENS	TMEM151A	NM_153266	0.536298	-1.86464	AA down vs CA
2334847	NM_172225 // DMBX1 // diencephalon/mesencephalon homeobox 1 // 1p33 // 127343 //	DMBX1	NM_172225	0.536373	-1.86437	AA down vs CA
3620741	NM_138477 // CDAN1 // congenital dyserythropoietic anemia, type I // 15q15.2 //	CDAN1	NM_138477	0.536386	-1.86433	AA down vs CA
2642441	NM_024800 // NEK11 // NIMA (never in mitosis gene a)- related kinase 11 // 3q22.	NEK11	NM_024800	0.536404	-1.86427	AA down vs CA
2623388	NM_001003931 // PARP3 // poly (ADP-ribose) polymerase family, member 3 // 3p21.3	PARP3	NM_001003931	0.536413	-1.86423	AA down vs CA
2387711	NM_020066 // FMN2 // formin 2 // 1q43 // 56776 /// ENST00000319653 // FMN2 // fo	FMN2	NM_020066	0.536415	-1.86423	AA down vs CA
3860912	ENST00000436972 // ZNF540 // zinc finger protein 540 // 19q13.12 // 163255 /// E	ZNF540	ENST00000436972	0.536483	-1.86399	AA down vs CA
3061997	NM_000305 // PON2 // paraoxonase 2 // 7q21.3 // 5445 /// NM_001018161 // PON2 //	PON2	NM_000305	1.86355	1.86355	AA up vs CA
3056226	NM_004603 // STX1A // syntaxin 1A (brain) // 7q11.23 // 6804 /// NM_001165903 //	STX1A	NM_004603	0.536615	-1.86353	AA down vs CA
2904788	BC033033 // C6orf81 // chromosome 6 open reading frame 81 // 6p21.31 // 221481 /	C6orf81	BC033033	0.536676	-1.86332	AA down vs CA
3512874	NM_002298 // LCP1 // lymphocyte cytosolic protein 1 (L-plastin) // 13q14.3 // 39	LCP1	NM_002298	1.86331	1.86331	AA up vs CA
2623139	NM_006010 // MANF // mesencephalic astrocyte-derived neurotrophic factor // 3p21	MANF	NM_006010	1.86291	1.86291	AA up vs CA
2829562	NM_024715 // TXNDC15 // thioredoxin domain containing 15 // 5q31.1 // 79770 ///	TXNDC15	NM_024715	1.86274	1.86274	AA up vs CA
2321849	NM_015291 // DNAJC16 // DnaJ (Hsp40) homolog, subfamily C, member 16 // 1p36.1 /	DNAJC16	NM_015291	1.86239	1.86239	AA up vs CA
3857691	NM_006003 // UQCRFS1 // ubiquinol-cytochrome c reductase, Rieske iron-sulfur pol	UQCRFS1	NM_006003	1.86235	1.86235	AA up vs CA
3247712	NM_018464 // CISD1 // CDGSH iron sulfur domain 1 // 10q21.1 // 55847 /// ENST000	CISD1	NM_018464	1.86207	1.86207	AA up vs CA
2333051	NM_005424 // TIE1 // tyrosine kinase with immunoglobulin-like and EGF-like domai	TIE1	NM_005424	0.537068	-1.86196	AA down vs CA
2452440	NM_018203 // KLHDC8A // kelch domain containing 8A // 1q32.1 // 55220 /// ENST00	KLHDC8A	NM_018203	0.537228	-1.86141	AA down vs CA
2527786	NM_021198 // CTDSP1 // CTD (carboxy-terminal domain, RNA polymerase II, polypept	CTDSP1	NM_021198	1.86136	1.86136	AA up vs CA
3886512	NM_024331 // TTPAL // tocopherol (alpha) transfer protein-like // 20q13.12 // 79	TTPAL	NM_024331	0.537256	-1.86131	AA down vs CA
2559189	NM_019885 // CYP26B1 // cytochrome P450, family 26, subfamily B, polypeptide 1 /	CYP26B1	NM_019885	0.537429	-1.86071	AA down vs CA
2374700	NR_026667 // RPS10P7 // ribosomal protein S10 pseudogene 7 // 1q32.1 // 376693	RPS10P7	NR_026667	0.537531	-1.86036	AA down vs CA
2396461	NM_003132 // SRM // spermidine synthase // 1p36-p22 // 6723 /// ENST00000376957	SRM	NM_003132	1.86006	1.86006	AA up vs CA
3869714	NM_001161499 // ZNF611 // zinc finger protein 611 // 19q13.41 // 81856 /// NM_03	ZNF611	NM_001161499	0.537706	-1.85975	AA down vs CA
3041122	NM_207342 // MGC87042 // STEAP family protein MGC87042 // 7p15.3 // 256227 /// N	MGC87042	NM_207342	0.537741	-1.85963	AA down vs CA
3679918	---		---	0.537782	-1.85949	AA down vs CA
3991992	NM_152695 // ZNF449 // zinc finger protein 449 // Xq26.3 // 203523 /// ENST00000	ZNF449	NM_152695	0.537949	-1.85891	AA down vs CA
3404823	NM_005042 // PRH2 // proline-rich protein HaeIII subfamily 2 // 12p13.2 // 5555	PRH2	NM_005042	0.538128	-1.85829	AA down vs CA
2383176	NM_001003665 // C1orf95 // chromosome 1 open reading frame 95 // 1q42.12 // 3750	C1orf95	NM_001003665	0.538198	-1.85805	AA down vs CA
2922215	NM_002356 // MARCKS // myristoylated alanine-rich protein kinase C substrate //	MARCKS	NM_002356	1.85785	1.85785	AA up vs CA
2704763	NM_001172779 // LRRC34 // leucine rich repeat containing 34 // 3q26.2 // 151827	LRRC34	NM_001172779	0.538554	-1.85683	AA down vs CA
3932917	NM_182832 // PLAC4 // placenta-specific 4 // 21q22.2 // 191585 /// AF269287 // P	PLAC4	NM_182832	0.53865	-1.85649	AA down vs CA
2322389	NM_018090 // NECAP2 // NECAP endocytosis associated 2 // 1p36.13 // 55707 /// NM	NECAP2	NM_018090	1.85634	1.85634	AA up vs CA
2363876	NM_001002901 // FCRLB // Fc receptor-like B // 1q23.3 // 127943 /// ENST00000367	FCRLB	NM_001002901	0.538729	-1.85622	AA down vs CA
3121023	NM_023080 // C8orf33 // chromosome 8 open reading frame 33 // 8q24.3 // 65265 //	C8orf33	NM_023080	1.85591	1.85591	AA up vs CA
3894228	NM_177559 // CSNK2A1 // casein kinase 2, alpha 1 polypeptide // 20p13 // 1457 //	CSNK2A1	NM_177559	1.85585	1.85585	AA up vs CA
3867693	NM_018111 // C19orf73 // chromosome 19 open reading frame 73 // 19q13.33 // 5515	C19orf73	NM_018111	0.538848	-1.85581	AA down vs CA
2315739	NM_153339 // PUSL1 // pseudouridylate synthase-like 1 // 1p36.33 // 126789 /// N	PUSL1	NM_153339	0.538896	-1.85565	AA down vs CA
3333116	NM_006133 // DAGLA // diacylglycerol lipase, alpha // 11q12.2 // 747 /// ENST000	DAGLA	NM_006133	0.539057	-1.85509	AA down vs CA
3448088	NM_030762 // BHLHE41 // basic helix-loop-helix family, member e41 // 12p12.1 //	BHLHE41	NM_030762	0.539267	-1.85437	AA down vs CA
2792161	NM_032136 // TKTL2 // transketolase-like 2 // 4q32.2 // 84076 /// ENST0000028060	TKTL2	NM_032136	0.539268	-1.85437	AA down vs CA
3234277	NM_001002295 // GATA3 // GATA binding protein 3 // 10p15 // 2625 /// NM_002051 /	GATA3	NM_001002295	0.539308	-1.85423	AA down vs CA
3015655	NM_012172 // FBXO24 // F-box protein 24 // 7q22 // 26261 /// NM_033506 // FBXO24	FBXO24	NM_012172	0.539482	-1.85363	AA down vs CA
3766893	NM_004396 // DDX5 // DEAD (Asp-Glu-Ala-Asp) box polypeptide 5 // 17q21 // 1655 /	DDX5	NM_004396	1.85347	1.85347	AA up vs CA
4047607	NM_024850 // BTNL8 // butyrophilin-like 8 // 5q35.3 // 79908 /// NM_001159708 //	BTNL8	NM_024850	0.53953	-1.85346	AA down vs CA
3294280	NM_015190 // DNAJC9 // DnaJ (Hsp40) homolog, subfamily C, member 9 // 10q22.2 //	DNAJC9	NM_015190	1.85242	1.85242	AA up vs CA
3475915	---		---	0.539894	-1.85222	AA down vs CA
2574752	NM_000122 // ERCC3 // excision repair cross-complementing rodent repair deficien	ERCC3	NM_000122	1.85221	1.85221	AA up vs CA
3033307	NM_001427 // EN2 // engrailed homeobox 2 // 7q36 // 2020 /// ENST00000297375 //	EN2	NM_001427	0.539976	-1.85193	AA down vs CA
3791896	NM_003784 // SERPINB7 // serpin peptidase inhibitor, clade B (ovalbumin), member	SERPINB7	NM_003784	0.540058	-1.85165	AA down vs CA
3756676	NM_031957 // KRTAP1-5 // keratin associated protein 1-5 // 17q12-q21 // 83895 //	KRTAP1-5	NM_031957	0.540097	-1.85152	AA down vs CA
2609414	AF086709 // LOH3CR2A // loss of heterozygosity, 3, chromosomal region 2, gene A	LOH3CR2A	AF086709	0.540197	-1.85118	AA down vs CA
2949570	NM_181842 // ZBTB12 // zinc finger and BTB domain containing 12 // 6p21.33 // 22	ZBTB12	NM_181842	0.54022	-1.8511	AA down vs CA
3016262	NM_133457 // EMID2 // EMI domain containing 2 // 7q22.1 // 136227 /// ENST000003	EMID2	NM_133457	0.540291	-1.85085	AA down vs CA
3269065	NM_022126 // LHPP // phospholysine phosphohistidine inorganic pyrophosphate phos	LHPP	NM_022126	1.85081	1.85081	AA up vs CA
3905145	NM_004613 // TGM2 // transglutaminase 2 (C polypeptide, protein-glutamine-gamma-	TGM2	NM_004613	1.85027	1.85027	AA up vs CA
2845879	NM_030782 // CLPTM1L // CLPTM1-like // 5p15.33 // 81037 /// ENST00000320895 // C	CLPTM1L	NM_030782	1.85007	1.85007	AA up vs CA
3264326	NM_016234 // ACSL5 // acyl-CoA synthetase long-chain family member 5 // 10q25.1-	ACSL5	NM_016234	1.84992	1.84992	AA up vs CA
3149161	NM_198123 // CSMD3 // CUB and Sushi multiple domains 3 // 8q23.3 // 114788 /// N	CSMD3	NM_198123	0.540644	-1.84965	AA down vs CA
3747907	---		---	0.540669	-1.84956	AA down vs CA
2603544	NM_006056 // NMUR1 // neuromedin U receptor 1 // 2q37.1 // 10316 /// ENST0000030	NMUR1	NM_006056	0.541025	-1.84834	AA down vs CA
3443296	NM_002355 // M6PR // mannose-6-phosphate receptor (cation dependent) // 12p13 //	M6PR	NM_002355	1.84789	1.84789	AA up vs CA
3373724	NM_003146 // SSRP1 // structure specific recognition protein 1 // 11q12 // 6749	SSRP1	NM_003146	1.84776	1.84776	AA up vs CA
2898562	NM_001160094 // ACOT13 // acyl-CoA thioesterase 13 // 6p22.3 // 55856 /// NM_018	ACOT13	NM_001160094	1.8474	1.8474	AA up vs CA
3379063	NM_080658 // ACY3 // aspartoacylase (aminocyclase) 3 // 11q13.2 // 91703 /// ENS	ACY3	NM_080658	1.84708	1.84708	AA up vs CA
3003193	NM_001762 // CCT6A // chaperonin containing TCP1, subunit 6A (zeta 1) // 7p11.2	CCT6A	NM_001762	1.84702	1.84702	AA up vs CA
3601840	NM_004383 // CSK // c-src tyrosine kinase // 15q24.1 // 1445 /// NM_001127190 //	CSK	NM_004383	1.84699	1.84699	AA up vs CA
2608801	NM_014674 // EDEM1 // ER degradation enhancer, mannosidase alpha-like 1 // 3p26.	EDEM1	NM_014674	1.84671	1.84671	AA up vs CA
2834579	NM_205841 // SPINK6 // serine peptidase inhibitor, Kazal type 6 // 5q32 // 40420	SPINK6	NM_205841	0.541574	-1.84647	AA down vs CA
2394726	NM_198681 // PLEKHG5 // pleckstrin homology domain containing, family G (with Rh	PLEKHG5	NM_198681	0.54159	-1.84641	AA down vs CA
3357840	NM_021034 // IFITM3 // interferon induced transmembrane protein 3 (1-8U) // 11p1	IFITM3	NM_021034	0.541619	-1.84632	AA down vs CA
2337217	NM_001039464 // C1orf175 // chromosome 1 open reading frame 175 // 1p32.3 // 374	C1orf175	NM_001039464	0.541814	-1.84565	AA down vs CA
2934089	NM_004906 // WTAP // Wilms tumor 1 associated protein // 6q25-q27 // 9589 /// NM	WTAP	NM_004906	1.84544	1.84544	AA up vs CA
3907456	NM_003279 // TNNC2 // troponin C type 2 (fast) // 20q12-q13.11 // 7125 /// ENST0	TNNC2	NM_003279	1.84528	1.84528	AA up vs CA
2333635	NM_001384 // DPH2 // DPH2 homolog (S. cerevisiae) // 1p34 // 1802 /// NM_0010395	DPH2	NM_001384	1.84485	1.84485	AA up vs CA
2953408	NM_173561 // UNC5CL // unc-5 homolog C (C. elegans)-like // 6p21.1 // 222643 ///	UNC5CL	NM_173561	0.542313	-1.84395	AA down vs CA
3250798	---		---	0.542347	-1.84384	AA down vs CA
2842157	NM_001131055 // HRH2 // histamine receptor H2 // 5q35.2 // 3274 /// NM_022304 //	HRH2	NM_001131055	0.542508	-1.84329	AA down vs CA
2811500	NM_173667 // FLJ37543 // hypothetical protein FLJ37543 // 5q12.1 // 285668 /// E	FLJ37543	NM_173667	0.542707	-1.84261	AA down vs CA
3266279	NM_003054 // SLC18A2 // solute carrier family 18 (vesicular monoamine), member 2	SLC18A2	NM_003054	0.542815	-1.84225	AA down vs CA
2829624	NM_178019 // CATSPER3 // cation channel, sperm associated 3 // 5q31.1 // 347732	CATSPER3	NM_178019	0.542822	-1.84223	AA down vs CA
2453370	NM_025179 // PLXNA2 // plexin A2 // 1q32.2 // 5362 /// ENST00000367033 // PLXNA2	PLXNA2	NM_025179	0.542881	-1.84202	AA down vs CA
2756965	NM_012445 // SPON2 // spondin 2, extracellular matrix protein // 4p16.3 // 10417	SPON2	NM_012445	1.842	1.842	AA up vs CA
2982381	NM_030752 // TCP1 // t-complex 1 // 6q25.3-q26 // 6950 /// NM_001008897 // TCP1	TCP1	NM_030752	1.8419	1.8419	AA up vs CA
2439944	NM_145167 // PIGM // phosphatidylinositol glycan anchor biosynthesis, class M //	PIGM	NM_145167	1.84175	1.84175	AA up vs CA
2641263	NM_004637 // RAB7A // RAB7A, member RAS oncogene family // 3q21.3 // 7879 /// EN	RAB7A	NM_004637	1.84165	1.84165	AA up vs CA
2835848	NM_078483 // SLC36A1 // solute carrier family 36 (proton/amino acid symporter),	SLC36A1	NM_078483	1.83955	1.83955	AA up vs CA
2359736	NM_015607 // C1orf77 // chromosome 1 open reading frame 77 // 1q21.3 // 26097 //	C1orf77	NM_015607	1.83919	1.83919	AA up vs CA
3848984	NM_032152 // PRAM1 // PML-RARA regulated adaptor molecule 1 // 19p13.2 // 84106	PRAM1	NM_032152	0.543776	-1.83899	AA down vs CA
3577360	NM_178013 // PRIMA1 // proline rich membrane anchor 1 // 14q32.12 // 145270 ///	PRIMA1	NM_178013	0.543794	-1.83893	AA down vs CA
2692060	NM_001146106 // PARP9 // poly (ADP-ribose) polymerase family, member 9 // 3q21 /	PARP9	NM_001146106	1.83873	1.83873	AA up vs CA
2438531	NM_004494 // HDGF // hepatoma-derived growth factor // 1q21-q23 // 3068 /// NM_0	HDGF	NM_004494	1.83836	1.83836	AA up vs CA
2890413	NM_018434 // RNF130 // ring finger protein 130 // 5q35.3 // 55819 /// AY083998 /	RNF130	NM_018434	1.83799	1.83799	AA up vs CA
2655650	NM_002808 // PSMD2 // proteasome (prosome, macropain) 26S subunit, non-ATPase, 2	PSMD2	NM_002808	1.83755	1.83755	AA up vs CA
3360982	NM_015324 // RRP8 // ribosomal RNA processing 8, methyltransferase, homolog (yea	RRP8	NM_015324	1.83746	1.83746	AA up vs CA
2568968	NM_025076 // UXS1 // UDP-glucuronate decarboxylase 1 // 2q12.2 // 80146 /// ENST	UXS1	NM_025076	1.8366	1.8366	AA up vs CA
2578790	NM_018557 // LRP1B // low density lipoprotein receptor-related protein 1B // 2q2	LRP1B	NM_018557	0.544569	-1.83631	AA down vs CA
3200134	AK021795 // MGC24103 // hypothetical MGC24103 // 9p22.3 // 158295	MGC24103	AK021795	0.54458	-1.83628	AA down vs CA
2420681	NM_018298 // MCOLN3 // mucolipin 3 // 1p22.3 // 55283 /// ENST00000302814 // MCO	MCOLN3	NM_018298	0.544679	-1.83594	AA down vs CA
2763550	NM_013261 // PPARGC1A // peroxisome proliferator-activated receptor gamma, coact	PPARGC1A	NM_013261	0.544713	-1.83583	AA down vs CA
3589410	NM_207445 // C15orf54 // chromosome 15 open reading frame 54 // 15q14 // 400360	C15orf54	NM_207445	0.544728	-1.83578	AA down vs CA
2521556	NM_138395 // MARS2 // methionyl-tRNA synthetase 2, mitochondrial // 2q33.1 // 92	MARS2	NM_138395	1.83544	1.83544	AA up vs CA
2434716	NM_181746 // LASS2 // LAG1 homolog, ceramide synthase 2 // 1q21.3 // 29956 /// N	LASS2	NM_181746	1.83525	1.83525	AA up vs CA
3666189	NM_019023 // PRMT7 // protein arginine methyltransferase 7 // 16q22.1 // 54496 /	PRMT7	NM_019023	1.83474	1.83474	AA up vs CA
3939154	NM_004914 // RAB36 // RAB36, member RAS oncogene family // 22q11.22 // 9609 ///	RAB36	NM_004914	0.545149	-1.83436	AA down vs CA
2676579	NM_052859 // RFT1 // RFT1 homolog (S. cerevisiae) // 3p21.1 // 91869 /// ENST000	RFT1	NM_052859	1.83407	1.83407	AA up vs CA
2324084	NM_001785 // CDA // cytidine deaminase // 1p36.2-p35 // 978 /// ENST00000375071	CDA	NM_001785	0.545362	-1.83364	AA down vs CA
3070499	NM_139175 // RNF133 // ring finger protein 133 // 7q31.32 // 168433 /// ENST0000	RNF133	NM_139175	0.545385	-1.83357	AA down vs CA
3837895	NM_020126 // SPHK2 // sphingosine kinase 2 // 19q13.2 // 56848 /// ENST000002452	SPHK2	NM_020126	0.545394	-1.83354	AA down vs CA
3953879	NR_003608 // MGC16703 // tubulin, alpha pseudogene // 22q11.21 // 113691 /// NR_	MGC16703	NR_003608	0.545807	-1.83215	AA down vs CA
3376490	NM_054108 // HRASLS5 // HRAS-like suppressor family, member 5 // 11q13.2 // 1172	HRASLS5	NM_054108	0.545822	-1.8321	AA down vs CA
3026834	NM_024926 // TTC26 // tetratricopeptide repeat domain 26 // 7q34 // 79989 /// NM	TTC26	NM_024926	0.546009	-1.83147	AA down vs CA
3676669	NM_006711 // RNPS1 // RNA binding protein S1, serine-rich domain // 16p13.3 // 1	RNPS1	NM_006711	1.83146	1.83146	AA up vs CA
3843180	NM_020657 // ZNF304 // zinc finger protein 304 // 19q13.4 // 57343 /// ENST00000	ZNF304	NM_020657	0.546017	-1.83144	AA down vs CA
3475350	NR_002809 // LOC338799 // hypothetical LOC338799 // 12q24.31 // 338799 /// AK095	LOC338799	NR_002809	0.546086	-1.83121	AA down vs CA
3619690	NM_017726 // PPP1R14D // protein phosphatase 1, regulatory (inhibitor) subunit 1	PPP1R14D	NM_017726	0.546255	-1.83065	AA down vs CA
3144346	NM_175634 // RUNX1T1 // runt-related transcription factor 1; translocated to, 1	RUNX1T1	NM_175634	0.546355	-1.83031	AA down vs CA
2805786	NM_152295 // TARS // threonyl-tRNA synthetase // 5p13.2 // 6897 /// ENST00000265	TARS	NM_152295	1.8299	1.8299	AA up vs CA
2326237	NM_004455 // EXTL1 // exostoses (multiple)-like 1 // 1p36.1 // 2134 /// ENST0000	EXTL1	NM_004455	0.546751	-1.82899	AA down vs CA
2903703	NM_006772 // SYNGAP1 // synaptic Ras GTPase activating protein 1 // 6p21.3 // 88	SYNGAP1	NM_006772	0.546895	-1.8285	AA down vs CA
2733287	NM_020226 // PRDM8 // PR domain containing 8 // 4q21 // 56978 /// NM_001099403 /	PRDM8	NM_020226	0.547128	-1.82773	AA down vs CA
2394361	NM_015102 // NPHP4 // nephronophthisis 4 // 1p36.22 // 261734 /// ENST0000037815	NPHP4	NM_015102	0.547153	-1.82764	AA down vs CA
3811574	NM_002974 // SERPINB4 // serpin peptidase inhibitor, clade B (ovalbumin), member	SERPINB4	NM_002974	0.547172	-1.82758	AA down vs CA
2738378	NM_001184690 // NPNT // nephronectin // 4q24 // 255743 /// NM_001184691 // NPNT	NPNT	NM_001184690	1.82738	1.82738	AA up vs CA
2689452	NM_007136 // ZNF80 // zinc finger protein 80 // 3q13.3 // 7634 /// ENST000003080	ZNF80	NM_007136	0.547304	-1.82714	AA down vs CA
3394123	NM_006389 // HYOU1 // hypoxia up-regulated 1 // 11q23.1-q23.3 // 10525 /// NM_00	HYOU1	NM_006389	1.827	1.827	AA up vs CA
2366028	NM_018442 // DCAF6 // DDB1 and CUL4 associated factor 6 // 1q24.2 // 55827 /// N	DCAF6	NM_018442	1.8269	1.8269	AA up vs CA
2900143	NM_012367 // OR2B6 // olfactory receptor, family 2, subfamily B, member 6 // 6p2	OR2B6	NM_012367	0.547487	-1.82653	AA down vs CA
3243262	NR_003086 // HSD17B7P2 // hydroxysteroid (17-beta) dehydrogenase 7 pseudogene 2	HSD17B7P2	NR_003086	0.547707	-1.82579	AA down vs CA
2502842	NM_183240 // TMEM37 // transmembrane protein 37 // 2q14.2 // 140738 /// ENST0000	TMEM37	NM_183240	0.547715	-1.82577	AA down vs CA
2924492	NM_012259 // HEY2 // hairy/enhancer-of-split related with YRPW motif 2 // 6q21 /	HEY2	NM_012259	0.547753	-1.82564	AA down vs CA
3890099	NM_019888 // MC3R // melanocortin 3 receptor // 20q13.2-q13.3 // 4159 /// ENST00	MC3R	NM_019888	0.5478	-1.82548	AA down vs CA
2908474	NM_007355 // HSP90AB1 // heat shock protein 90kDa alpha (cytosolic), class B mem	HSP90AB1	NM_007355	1.82548	1.82548	AA up vs CA
3638699	NM_182616 // C15orf38 // chromosome 15 open reading frame 38 // 15q26.1 // 34811	C15orf38	NM_182616	1.82535	1.82535	AA up vs CA
2390135	NM_001001915 // OR2G2 // olfactory receptor, family 2, subfamily G, member 2 //	OR2G2	NM_001001915	0.547865	-1.82527	AA down vs CA
2536874	NM_022134 // GAL3ST2 // galactose-3-O-sulfotransferase 2 // 2q37.3 // 64090 ///	GAL3ST2	NM_022134	0.548081	-1.82455	AA down vs CA
2497018	AY358263 // LOC100131131 // AHPA9419 // 2q12.1 // 100131131	LOC100131131	AY358263	0.548105	-1.82447	AA down vs CA
2446244	NM_015602 // TOR1AIP1 // torsin A interacting protein 1 // 1q24.2 // 26092 /// E	TOR1AIP1	NM_015602	0.54822	-1.82409	AA down vs CA
3076753	NM_001080392 // KIAA1147 // KIAA1147 // 7q34 // 57189 /// ENST00000297761 // KIA	KIAA1147	NM_001080392	0.548301	-1.82382	AA down vs CA
3580357	NM_152326 // ANKRD9 // ankyrin repeat domain 9 // 14q32.31 // 122416 /// ENST000	ANKRD9	NM_152326	0.5485	-1.82315	AA down vs CA
3230332	NR_003672 // SNHG7 // small nucleolar RNA host gene 7 (non-protein coding) // 9q	SNHG7	NR_003672	0.548522	-1.82308	AA down vs CA
3571667	NM_001249 // ENTPD5 // ectonucleoside triphosphate diphosphohydrolase 5 // 14q24	ENTPD5	NM_001249	1.82287	1.82287	AA up vs CA
2435745	NM_178431 // LCE3A // late cornified envelope 3A // 1q21.3 // 353142 /// ENST000	LCE3A	NM_178431	0.548626	-1.82273	AA down vs CA
3053691	NM_000181 // GUSB // glucuronidase, beta // 7q21.11 // 2990 /// ENST00000304895	GUSB	NM_000181	1.82207	1.82207	AA up vs CA
2406783	NM_156039 // CSF3R // colony stimulating factor 3 receptor (granulocyte) // 1p35	CSF3R	NM_156039	0.548907	-1.8218	AA down vs CA
2436576	NM_001098616 // C1orf43 // chromosome 1 open reading frame 43 // 1q21.2 // 25912	C1orf43	NM_001098616	1.82172	1.82172	AA up vs CA
3800165	NM_145287 // ZNF519 // zinc finger protein 519 // 18p11.21 // 162655 /// NR_0333	ZNF519	NM_145287	0.549028	-1.8214	AA down vs CA
2843131	NM_003052 // SLC34A1 // solute carrier family 34 (sodium phosphate), member 1 //	SLC34A1	NM_003052	0.549039	-1.82136	AA down vs CA
2323603	NM_001040125 // PQLC2 // PQ loop repeat containing 2 // 1p36.13 // 54896 /// NM_	PQLC2	NM_001040125	0.549052	-1.82132	AA down vs CA
3761989	NM_030802 // FAM117A // family with sequence similarity 117, member A // 17q21.3	FAM117A	NM_030802	0.549116	-1.82111	AA down vs CA
2985342	AB016899 // C6orf54 // chromosome 6 open reading frame 54 // 6q27 // 26236 /// A	C6orf54	AB016899	0.549151	-1.82099	AA down vs CA
2883392	NM_130899 // FAM71B // family with sequence similarity 71, member B // 5q33.3 //	FAM71B	NM_130899	0.549284	-1.82055	AA down vs CA
3908831	NM_021035 // ZNFX1 // zinc finger, NFX1-type containing 1 // 20q13.13 // 57169 /	ZNFX1	NM_021035	1.82047	1.82047	AA up vs CA
3236786	NM_030664 // PTER // phosphotriesterase related // 10p12 // 9317 /// NM_00100148	PTER	NM_030664	1.82039	1.82039	AA up vs CA
2621917	NM_018031 // WDR6 // WD repeat domain 6 // 3p21.31 // 11180 /// ENST00000395474	WDR6	NM_018031	1.82028	1.82028	AA up vs CA
3393993	NM_182557 // BCL9L // B-cell CLL/lymphoma 9-like // 11q23.3 // 283149 /// ENST00	BCL9L	NM_182557	0.549387	-1.82021	AA down vs CA
2528620	NM_205847 // GMPPA // GDP-mannose pyrophosphorylase A // 2q35 // 29926 /// NM_01	GMPPA	NM_205847	1.82008	1.82008	AA up vs CA
3541497	NM_002877 // RAD51L1 // RAD51-like 1 (S. cerevisiae) // 14q23-q24.2 // 5890 ///	RAD51L1	NM_002877	0.549476	-1.81991	AA down vs CA
3844297	NR_026052 // MGC2752 // hypothetical LOC65996 // 19q13.43 // 65996 /// NR_024528	MGC2752	NR_026052	1.81983	1.81983	AA up vs CA
2858752	NM_001184819 // GNL3L // guanine nucleotide binding protein-like 3 (nucleolar)-l	GNL3L	NM_001184819	0.549623	-1.81943	AA down vs CA
2514122	NM_203463 // LASS6 // LAG1 homolog, ceramide synthase 6 // 2q24.3 // 253782 ///	LASS6	NM_203463	1.81922	1.81922	AA up vs CA
3973396	NM_152631 // FAM47B // family with sequence similarity 47, member B // Xp21.1 //	FAM47B	NM_152631	0.549746	-1.81902	AA down vs CA
3557408	NM_005864 // EFS // embryonal Fyn-associated substrate // 14q11.2-q12 // 10278 /	EFS	NM_005864	0.549793	-1.81887	AA down vs CA
3766453	NM_022644 // CSH2 // chorionic somatomammotropin hormone 2 // 17q24.2 // 1443 //	CSH2	NM_022644	0.549908	-1.81849	AA down vs CA
2591292	NM_182521 // ZSWIM2 // zinc finger, SWIM-type containing 2 // 2q32.1 // 151112 /	ZSWIM2	NM_182521	0.549956	-1.81833	AA down vs CA
2545092	NM_000182 // HADHA // hydroxyacyl-CoA dehydrogenase/3-ketoacyl-CoA thiolase/enoy	HADHA	NM_000182	1.81815	1.81815	AA up vs CA
2899090	NM_003529 // HIST1H3A // histone cluster 1, H3a // 6p21.3 // 8350 /// BC066245 /	HIST1H3A	NM_003529	1.81733	1.81733	AA up vs CA
3939545	NM_002415 // MIF // macrophage migration inhibitory factor (glycosylation-inhibi	MIF	NM_002415	1.81727	1.81727	AA up vs CA
3771160	NM_001080542 // FBF1 // Fas (TNFRSF6) binding factor 1 // 17q25.1 // 85302 /// E	FBF1	NM_001080542	0.550397	-1.81687	AA down vs CA
2429277	NM_001130523 // CSDE1 // cold shock domain containing E1, RNA-binding // 1p22 //	CSDE1	NM_001130523	1.81641	1.81641	AA up vs CA
2335986	NM_014372 // RNF11 // ring finger protein 11 // 1p32 // 26994 /// ENST0000024271	RNF11	NM_014372	1.81638	1.81638	AA up vs CA
2697971	---		---	0.55055	-1.81637	AA down vs CA
3562557	NM_032135 // FSCB // fibrous sheath CABYR binding protein // 14q21.2 // 84075 //	FSCB	NM_032135	0.550564	-1.81632	AA down vs CA
2960303	NM_080742 // B3GAT2 // beta-1,3-glucuronyltransferase 2 (glucuronosyltransferase	B3GAT2	NM_080742	0.550614	-1.81615	AA down vs CA
3844978	NM_014963 // SBNO2 // strawberry notch homolog 2 (Drosophila) // 19p13.3 // 2290	SBNO2	NM_014963	1.81595	1.81595	AA up vs CA
2767932	NM_173536 // GABRG1 // gamma-aminobutyric acid (GABA) A receptor, gamma 1 // 4p1	GABRG1	NM_173536	0.550685	-1.81592	AA down vs CA
2335132	NM_016308 // CMPK1 // cytidine monophosphate (UMP-CMP) kinase 1, cytosolic // 1p	CMPK1	NM_016308	1.81581	1.81581	AA up vs CA
3958063	AK294232 // C22orf24 // chromosome 22 open reading frame 24 // 22q12.1-q12.3 //	C22orf24	AK294232	0.55076	-1.81567	AA down vs CA
2649710	AY070437 // LOC100287290 // cytokine receptor CRL2 // 3q25.32 // 100287290	LOC100287290	AY070437	0.550835	-1.81543	AA down vs CA
3925295	NR_027270 // C21orf81 // ankyrin repeat domain 20 family, member A3 pseudogene /	C21orf81	NR_027270	0.550887	-1.81525	AA down vs CA
2491386	NM_031283 // TCF7L1 // transcription factor 7-like 1 (T-cell specific, HMG-box)	TCF7L1	NM_031283	0.551014	-1.81484	AA down vs CA
3989259	NM_012084 // GLUD2 // glutamate dehydrogenase 2 // Xq24-q25 // 2747 /// NM_00527	GLUD2	NM_012084	1.81481	1.81481	AA up vs CA
2738723	NM_001184705 // HADH // hydroxyacyl-CoA dehydrogenase // 4q22-q26 // 3033 /// NM	HADH	NM_001184705	1.81431	1.81431	AA up vs CA
3574207	NM_005065 // SEL1L // sel-1 suppressor of lin-12-like (C. elegans) // 14q31 // 6	SEL1L	NM_005065	1.81369	1.81369	AA up vs CA
3057499	---		---	0.55141	-1.81353	AA down vs CA
3127878	NM_001128930 // ENTPD4 // ectonucleoside triphosphate diphosphohydrolase 4 // 8p	ENTPD4	NM_001128930	1.81312	1.81312	AA up vs CA
2534509	NM_005855 // RAMP1 // receptor (G protein-coupled) activity modifying protein 1	RAMP1	NM_005855	1.81284	1.81284	AA up vs CA
2448073	NM_006469 // IVNS1ABP // influenza virus NS1A binding protein // 1q25.1-q31.1 //	IVNS1ABP	NM_006469	1.81238	1.81238	AA up vs CA
3337740	---		---	0.551817	-1.81219	AA down vs CA
2580635	NM_015702 // MMADHC // methylmalonic aciduria (cobalamin deficiency) cblD type,	MMADHC	NM_015702	1.81216	1.81216	AA up vs CA
3453712	NM_144593 // RHEBL1 // Ras homolog enriched in brain like 1 // 12q13.12 // 12126	RHEBL1	NM_144593	0.551851	-1.81208	AA down vs CA
2322362	NM_001114600 // C1orf144 // chromosome 1 open reading frame 144 // 1p36.13 // 26	C1orf144	NM_001114600	1.81144	1.81144	AA up vs CA
3983154	NM_021998 // ZNF711 // zinc finger protein 711 // Xq21.1 // 7552 /// ENST0000037	ZNF711	NM_021998	0.55206	-1.8114	AA down vs CA
3301512	NM_002860 // ALDH18A1 // aldehyde dehydrogenase 18 family, member A1 // 10q24.3	ALDH18A1	NM_002860	1.81132	1.81132	AA up vs CA
2617659	NM_004803 // SLC22A14 // solute carrier family 22, member 14 // 3p21.3 // 9389 /	SLC22A14	NM_004803	0.552126	-1.81118	AA down vs CA
3000895	---		---	0.552178	-1.81101	AA down vs CA
3478068	NM_133448 // TMEM132D // transmembrane protein 132D // 12q24.33 // 121256 /// EN	TMEM132D	NM_133448	0.552184	-1.81099	AA down vs CA
3836705	NM_152794 // HIF3A // hypoxia inducible factor 3, alpha subunit // 19q13.32 // 6	HIF3A	NM_152794	0.552325	-1.81053	AA down vs CA
3250237	NM_025130 // HKDC1 // hexokinase domain containing 1 // 10q22.1 // 80201 /// ENS	HKDC1	NM_025130	0.552431	-1.81018	AA down vs CA
2374872	NM_018085 // IPO9 // importin 9 // 1q32.1 // 55705 /// ENST00000361565 // IPO9 /	IPO9	NM_018085	1.81007	1.81007	AA up vs CA
2417008	NM_005478 // INSL5 // insulin-like 5 // 1p31.3 // 10022 /// ENST00000304526 // I	INSL5	NM_005478	0.552468	-1.81006	AA down vs CA
2728189	NM_001079525 // PAICS // phosphoribosylaminoimidazole carboxylase, phosphoribosy	PAICS	NM_001079525	1.80993	1.80993	AA up vs CA
3079463	NM_007189 // ABCF2 // ATP-binding cassette, sub-family F (GCN20), member 2 // 7q	ABCF2	NM_007189	1.80982	1.80982	AA up vs CA
2938196	NM_018303 // EXOC2 // exocyst complex component 2 // 6p25.3 // 55770 /// ENST000	EXOC2	NM_018303	1.80935	1.80935	AA up vs CA
2545509	NM_013388 // PREB // prolactin regulatory element binding // 2p23.3 // 10113 ///	PREB	NM_013388	1.80935	1.80935	AA up vs CA
3601486	NM_001130136 // ISLR2 // immunoglobulin superfamily containing leucine-rich repe	ISLR2	NM_001130136	0.552737	-1.80918	AA down vs CA
3373520	NM_001005284 // OR9G4 // olfactory receptor, family 9, subfamily G, member 4 //	OR9G4	NM_001005284	0.55274	-1.80917	AA down vs CA
2953262	AK123643 // FLJ41649 // hypothetical LOC401260 // 6p21.2 // 401260	FLJ41649	AK123643	0.552787	-1.80901	AA down vs CA
2738314	NM_001031720 // GSTCD // glutathione S-transferase, C-terminal domain containing	GSTCD	NM_001031720	0.552817	-1.80892	AA down vs CA
3738901	NM_001038618 // NARF // nuclear prelamin A recognition factor // 17q25.3 // 2650	NARF	NM_001038618	1.80874	1.80874	AA up vs CA
3380365	NM_012309 // SHANK2 // SH3 and multiple ankyrin repeat domains 2 // 11q13.2 // 2	SHANK2	NM_012309	0.553064	-1.80811	AA down vs CA
3565785	NM_199047 // TBPL2 // TATA box binding protein like 2 // 14q22.3 // 387332 /// E	TBPL2	NM_199047	0.553181	-1.80773	AA down vs CA
3396736	NM_031307 // PUS3 // pseudouridylate synthase 3 // 11q24.2 // 83480 /// ENST0000	PUS3	NM_031307	1.8073	1.8073	AA up vs CA
3098213	NM_005285 // NPBWR1 // neuropeptides B/W receptor 1 // 8p22-q21.13 // 2831 /// E	NPBWR1	NM_005285	0.5534	-1.80701	AA down vs CA
4018436	NM_178175 // LHFPL1 // lipoma HMGIC fusion partner-like 1 // Xq23 // 340596 ///	LHFPL1	NM_178175	0.553471	-1.80678	AA down vs CA
3628104	NM_001007595 // C2CD4B // C2 calcium-dependent domain containing 4B // 15q22.2 /	C2CD4B	NM_001007595	0.553485	-1.80673	AA down vs CA
2723605	NM_001104629 // C4orf19 // chromosome 4 open reading frame 19 // 4p14 // 55286 /	C4orf19	NM_001104629	0.55362	-1.80629	AA down vs CA
2632919	NM_032146 // ARL6 // ADP-ribosylation factor-like 6 // 3q11.2 // 84100 /// NM_17	ARL6	NM_032146	0.553632	-1.80625	AA down vs CA
2777044	NM_178135 // HSD17B13 // hydroxysteroid (17-beta) dehydrogenase 13 // 4q22.1 //	HSD17B13	NM_178135	0.553674	-1.80612	AA down vs CA
2798475	NM_052909 // PLEKHG4B // pleckstrin homology domain containing, family G (with R	PLEKHG4B	NM_052909	0.553694	-1.80605	AA down vs CA
2436754	NM_001111 // ADAR // adenosine deaminase, RNA-specific // 1q21.1-q21.2 // 103 //	ADAR	NM_001111	1.80601	1.80601	AA up vs CA
2379399	NM_012424 // RPS6KC1 // ribosomal protein S6 kinase, 52kDa, polypeptide 1 // 1q4	RPS6KC1	NM_012424	1.80592	1.80592	AA up vs CA
3250055	NM_004728 // DDX21 // DEAD (Asp-Glu-Ala-Asp) box polypeptide 21 // 10q21 // 9188	DDX21	NM_004728	1.80575	1.80575	AA up vs CA
3438527	NM_003565 // ULK1 // unc-51-like kinase 1 (C. elegans) // 12q24.3 // 8408 /// EN	ULK1	NM_003565	0.55396	-1.80518	AA down vs CA
3831260	NM_007145 // ZNF146 // zinc finger protein 146 // 19q13.1 // 7705 /// NM_0010996	ZNF146	NM_007145	1.80502	1.80502	AA up vs CA
2831436	NM_032289 // PSD2 // pleckstrin and Sec7 domain containing 2 // 5q31.2 // 84249	PSD2	NM_032289	0.554346	-1.80393	AA down vs CA
2474430	NM_032546 // TRIM54 // tripartite motif-containing 54 // 2p23.3 // 57159 /// NM_	TRIM54	NM_032546	0.554385	-1.8038	AA down vs CA
3353417	NM_019604 // CRTAM // cytotoxic and regulatory T cell molecule // 11q24.1 // 562	CRTAM	NM_019604	0.554398	-1.80376	AA down vs CA
3708582	AK097400 // SPEM1 // spermatid maturation 1 // 17p13.1 // 374768 /// ENST0000032	SPEM1	AK097400	0.55444	-1.80362	AA down vs CA
3852581	NM_001008701 // LPHN1 // latrophilin 1 // 19p13.2 // 22859 /// NM_014921 // LPHN	LPHN1	NM_001008701	0.554491	-1.80346	AA down vs CA
3829751	NM_032346 // PDCD2L // programmed cell death 2-like // 19q13.11 // 84306 /// ENS	PDCD2L	NM_032346	1.80331	1.80331	AA up vs CA
3061964	NM_000940 // PON3 // paraoxonase 3 // 7q21.3 // 5446 /// ENST00000265627 // PON3	PON3	NM_000940	0.554679	-1.80284	AA down vs CA
3950932	NM_138433 // KLHDC7B // kelch domain containing 7B // 22q13.33 // 113730 /// ENS	KLHDC7B	NM_138433	0.554951	-1.80196	AA down vs CA
2593159	NM_004226 // STK17B // serine/threonine kinase 17b // 2q32.3 // 9262 /// ENST000	STK17B	NM_004226	1.80194	1.80194	AA up vs CA
3872678	NM_023926 // ZSCAN18 // zinc finger and SCAN domain containing 18 // 19q13.43 //	ZSCAN18	NM_023926	0.55498	-1.80187	AA down vs CA
2603320	NM_005683 // GPR55 // G protein-coupled receptor 55 // 2q37 // 9290 /// ENST0000	GPR55	NM_005683	0.555	-1.8018	AA down vs CA
2953481	NM_178174 // TREML1 // triggering receptor expressed on myeloid cells-like 1 //	TREML1	NM_178174	0.55504	-1.80167	AA down vs CA
3572975	NM_021257 // NGB // neuroglobin // 14q24.3 // 58157 /// ENST00000298352 // NGB /	NGB	NM_021257	0.555061	-1.8016	AA down vs CA
3771712	NM_018414 // ST6GALNAC1 // ST6 (alpha-N-acetyl-neuraminyl-2,3-beta-galactosyl-1,	ST6GALNAC1	NM_018414	1.80152	1.80152	AA up vs CA
3378344	NM_003793 // CTSF // cathepsin F // 11q13 // 8722 /// ENST00000310325 // CTSF //	CTSF	NM_003793	1.80136	1.80136	AA up vs CA
2404693	NM_001703 // BAI2 // brain-specific angiogenesis inhibitor 2 // 1p35 // 576 ///	BAI2	NM_001703	0.555165	-1.80127	AA down vs CA
2827057	NM_001146321 // GRAMD3 // GRAM domain containing 3 // 5q23.2 // 65983 /// NM_001	GRAMD3	NM_001146321	1.80114	1.80114	AA up vs CA
3264948	NM_033338 // CASP7 // caspase 7, apoptosis-related cysteine peptidase // 10q25 /	CASP7	NM_033338	1.80103	1.80103	AA up vs CA
3403539	NM_018416 // FOXJ2 // forkhead box J2 // 12p13.31 // 55810 /// ENST00000162391 /	FOXJ2	NM_018416	0.555279	-1.80089	AA down vs CA
2447107	NM_172000 // TEDDM1 // transmembrane epididymal protein 1 // 1q25.3 // 127670 //	TEDDM1	NM_172000	0.555306	-1.80081	AA down vs CA
2867392	NM_173665 // C5orf36 // chromosome 5 open reading frame 36 // 5q15 // 285600 ///	C5orf36	NM_173665	0.555496	-1.80019	AA down vs CA
2901312	NR_028032 // HCG9 // HLA complex group 9 // 6p21.3 // 10255 /// AK289926 // HCG9	HCG9	NR_028032	0.555814	-1.79916	AA down vs CA
4035833	NM_013230 // CD24 // CD24 molecule // 6q21 // 100133941 /// BC064619 // CD24 //	CD24	NM_013230	1.79905	1.79905	AA up vs CA
2697564	NM_006219 // PIK3CB // phosphoinositide-3-kinase, catalytic, beta polypeptide //	PIK3CB	NM_006219	1.79876	1.79876	AA up vs CA
3361420	NM_198185 // OVCH2 // ovochymase 2 (gene/pseudogene) // 11p15.4 // 341277 /// EN	OVCH2	NM_198185	0.555982	-1.79862	AA down vs CA
2558045	NM_002056 // GFPT1 // glutamine--fructose-6-phosphate transaminase 1 // 2p13 //	GFPT1	NM_002056	1.7982	1.7982	AA up vs CA
3389566	NM_198439 // KBTBD3 // kelch repeat and BTB (POZ) domain containing 3 // 11q22.3	KBTBD3	NM_198439	0.556213	-1.79787	AA down vs CA
3759778	NM_199282 // ARHGAP27 // Rho GTPase activating protein 27 // 17q21.31 // 201176	ARHGAP27	NM_199282	0.556314	-1.79755	AA down vs CA
3011180	NM_000840 // GRM3 // glutamate receptor, metabotropic 3 // 7q21.1-q21.2 // 2913	GRM3	NM_000840	0.556314	-1.79755	AA down vs CA
2673503	NM_033199 // UCN2 // urocortin 2 // 3p21.3 // 90226 /// ENST00000273610 // UCN2	UCN2	NM_033199	0.556561	-1.79675	AA down vs CA
3814927	NM_130760 // MADCAM1 // mucosal vascular addressin cell adhesion molecule 1 // 1	MADCAM1	NM_130760	0.55669	-1.79633	AA down vs CA
2516953	NM_006898 // HOXD3 // homeobox D3 // 2q31.1 // 3232 /// ENST00000249440 // HOXD3	HOXD3	NM_006898	0.556699	-1.7963	AA down vs CA
2633930	NM_020357 // PCNP // PEST proteolytic signal containing nuclear protein // 3q12.	PCNP	NM_020357	1.7959	1.7959	AA up vs CA
2899261	NM_003525 // HIST1H2BI // histone cluster 1, H2bi // 6p21.3 // 8346 /// BC101653	HIST1H2BI	NM_003525	0.556903	-1.79565	AA down vs CA
3838624	NM_001136019 // FCGRT // Fc fragment of IgG, receptor, transporter, alpha // 19q	FCGRT	NM_001136019	1.79542	1.79542	AA up vs CA
3230733	NM_203468 // ENTPD2 // ectonucleoside triphosphate diphosphohydrolase 2 // 9q34	ENTPD2	NM_203468	0.556997	-1.79534	AA down vs CA
2680819	NM_003848 // SUCLG2 // succinate-CoA ligase, GDP-forming, beta subunit // 3p14.1	SUCLG2	NM_003848	1.79497	1.79497	AA up vs CA
3204019	NM_001184940 // C9orf25 // chromosome 9 open reading frame 25 // 9p13.3 // 20325	C9orf25	NM_001184940	0.557215	-1.79464	AA down vs CA
2603460	NM_005381 // NCL // nucleolin // 2q37.1 // 4691 /// NR_002908 // SNORD20 // smal	NCL	NM_005381	1.79445	1.79445	AA up vs CA
3817256	NM_015897 // PIAS4 // protein inhibitor of activated STAT, 4 // 19p13.3 // 51588	PIAS4	NM_015897	0.55737	-1.79414	AA down vs CA
3871242	NM_173804 // TMEM86B // transmembrane protein 86B // 19q13.42 // 255043 /// ENST	TMEM86B	NM_173804	0.55751	-1.79369	AA down vs CA
3365525	NM_194285 // SPTY2D1 // SPT2, Suppressor of Ty, domain containing 1 (S. cerevisi	SPTY2D1	NM_194285	1.79357	1.79357	AA up vs CA
2488078	NM_005791 // MPHOSPH10 // M-phase phosphoprotein 10 (U3 small nucleolar ribonucl	MPHOSPH10	NM_005791	1.79216	1.79216	AA up vs CA
2877028	NM_017415 // KLHL3 // kelch-like 3 (Drosophila) // 5q31 // 26249 /// ENST0000030	KLHL3	NM_017415	0.557991	-1.79214	AA down vs CA
2728271	NM_206919 // ARL9 // ADP-ribosylation factor-like 9 // 4q12 // 132946 /// ENST00	ARL9	NM_206919	0.558018	-1.79206	AA down vs CA
4007865	NM_006150 // PRICKLE3 // prickle homolog 3 (Drosophila) // Xp11.23 // 4007 /// E	PRICKLE3	NM_006150	0.558038	-1.79199	AA down vs CA
3053380	NM_001007253 // ERV3 // endogenous retroviral sequence 3 // 7p12-q11|7q11.2 // 2	ERV3	NM_001007253	0.558146	-1.79165	AA down vs CA
3936550	NM_017414 // USP18 // ubiquitin specific peptidase 18 // 22q11.21 // 11274 /// E	USP18	NM_017414	1.79155	1.79155	AA up vs CA
3214496	NM_004560 // ROR2 // receptor tyrosine kinase-like orphan receptor 2 // 9q22 //	ROR2	NM_004560	0.558199	-1.79148	AA down vs CA
3392091	NM_001077639 // FAM55D // family with sequence similarity 55, member D // 11q23.	FAM55D	NM_001077639	0.558351	-1.79099	AA down vs CA
3061621	NM_006528 // TFPI2 // tissue factor pathway inhibitor 2 // 7q22 // 7980 /// ENST	TFPI2	NM_006528	0.558399	-1.79083	AA down vs CA
3550343	NM_152327 // AK7 // adenylate kinase 7 // 14q32.2 // 122481 /// ENST00000267584	AK7	NM_152327	0.558406	-1.79081	AA down vs CA
2920906	NM_003080 // SMPD2 // sphingomyelin phosphodiesterase 2, neutral membrane (neutr	SMPD2	NM_003080	1.79067	1.79067	AA up vs CA
3037385	NM_006854 // KDELR2 // KDEL (Lys-Asp-Glu-Leu) endoplasmic reticulum protein rete	KDELR2	NM_006854	1.79065	1.79065	AA up vs CA
3865905	NM_207393 // IGFL3 // IGF-like family member 3 // 19q13.32 // 388555 /// ENST000	IGFL3	NM_207393	0.558457	-1.79065	AA down vs CA
3314720	NM_173572 // C10orf93 // chromosome 10 open reading frame 93 // 10q26.3 // 25535	C10orf93	NM_173572	0.558503	-1.7905	AA down vs CA
3757108	NM_002276 // KRT19 // keratin 19 // 17q21.2 // 3880 /// ENST00000361566 // KRT19	KRT19	NM_002276	1.79043	1.79043	AA up vs CA
2901620	NM_005516 // HLA-E // major histocompatibility complex, class I, E // 6p21.3 //	HLA-E	NM_005516	1.79005	1.79005	AA up vs CA
3637367	NM_022480 // KLHL25 // kelch-like 25 (Drosophila) // 15q25.3 // 64410 /// ENST00	KLHL25	NM_022480	0.558898	-1.78923	AA down vs CA
3376235	NM_018093 // WDR74 // WD repeat domain 74 // 11q12.3 // 54663 /// NM_018093 // W	WDR74	NM_018093	1.78892	1.78892	AA up vs CA
2701294	NM_001123228 // TMEM14E // transmembrane protein 14E // 3q25.1 // 645843 /// ENS	TMEM14E	NM_001123228	0.559086	-1.78863	AA down vs CA
2440413	NM_017625 // ITLN1 // intelectin 1 (galactofuranose binding) // 1q21.3 // 55600	ITLN1	NM_017625	0.559139	-1.78847	AA down vs CA
2406412	BC026909 // C1orf216 // chromosome 1 open reading frame 216 // 1p34.3 // 127703	C1orf216	BC026909	0.559322	-1.78788	AA down vs CA
2412529	NM_002525 // NRD1 // nardilysin (N-arginine dibasic convertase) // 1p32.2-p32.1	NRD1	NM_002525	1.78765	1.78765	AA up vs CA
2713664	NM_032263 // IQCG // IQ motif containing G // 3q29 // 84223 /// NM_001134435 //	IQCG	NM_032263	0.559398	-1.78764	AA down vs CA
2326327	NM_006314 // CNKSR1 // connector enhancer of kinase suppressor of Ras 1 // 1p36.	CNKSR1	NM_006314	0.559415	-1.78758	AA down vs CA
3200648	NM_001122 // PLIN2 // perilipin 2 // 9p22.1 // 123 /// ENST00000276914 // PLIN2	PLIN2	NM_001122	1.78726	1.78726	AA up vs CA
2675720	NM_152397 // IQCF1 // IQ motif containing F1 // 3p21.2 // 132141 /// ENST0000031	IQCF1	NM_152397	0.559534	-1.7872	AA down vs CA
3840406	NR_023311 // ZNF137P // zinc finger protein 137, pseudogene // 19q13.4 // 7696 /	ZNF137P	NR_023311	0.559551	-1.78715	AA down vs CA
3369755	NM_014186 // COMMD9 // COMM domain containing 9 // 11p13 // 29099 /// NM_0011016	COMMD9	NM_014186	0.559585	-1.78704	AA down vs CA
2859387	NM_000524 // HTR1A // 5-hydroxytryptamine (serotonin) receptor 1A // 5q11.2-q13	HTR1A	NM_000524	0.559765	-1.78647	AA down vs CA
2717481	NR_026892 // AFAP1-AS // AFAP1 antisense RNA (non-protein coding) // 4p16.1 // 8	AFAP1-AS	NR_026892	0.559822	-1.78628	AA down vs CA
3300038	NR_002779 // NUDT9P1 // nudix (nucleoside diphosphate linked moiety X)-type moti	NUDT9P1	NR_002779	0.559855	-1.78618	AA down vs CA
3976240	NM_003446 // ZNF157 // zinc finger protein 157 // Xp11.2 // 7712 /// NR_003710 /	ZNF157	NM_003446	0.559865	-1.78614	AA down vs CA
2554975	NM_022893 // BCL11A // B-cell CLL/lymphoma 11A (zinc finger protein) // 2p16.1 /	BCL11A	NM_022893	0.559906	-1.78602	AA down vs CA
3033924	NM_014671 // UBE3C // ubiquitin protein ligase E3C // 7q36.3 // 9690 /// ENST000	UBE3C	NM_014671	1.78599	1.78599	AA up vs CA
2831124	NM_199189 // MATR3 // matrin 3 // 5q31.2 // 9782 /// NM_001194954 // MATR3 // ma	MATR3	NM_199189	1.7858	1.7858	AA up vs CA
3063532	NM_001005276 // OR2AE1 // olfactory receptor, family 2, subfamily AE, member 1 /	OR2AE1	NM_001005276	0.560014	-1.78567	AA down vs CA
2465778	NM_001005286 // OR6F1 // olfactory receptor, family 6, subfamily F, member 1 //	OR6F1	NM_001005286	0.560081	-1.78546	AA down vs CA
2342904	NM_030965 // ST6GALNAC5 // ST6 (alpha-N-acetyl-neuraminyl-2,3-beta-galactosyl-1,	ST6GALNAC5	NM_030965	1.78543	1.78543	AA up vs CA
3512157	ENST00000400419 // MGC5590 // hypothetical protein MGC5590 // 13q14.11 // 79024	MGC5590	ENST00000400419	0.560112	-1.78536	AA down vs CA
2988594	NM_001040661 // SLC29A4 // solute carrier family 29 (nucleoside transporters), m	SLC29A4	NM_001040661	0.560118	-1.78534	AA down vs CA
3203855	NM_015397 // DCAF12 // DDB1 and CUL4 associated factor 12 // 9p13.3 // 25853 ///	DCAF12	NM_015397	1.78522	1.78522	AA up vs CA
3962560	NM_001165877 // ATP5L2 // ATP synthase, H+ transporting, mitochondrial Fo comple	ATP5L2	NM_001165877	0.560181	-1.78514	AA down vs CA
3454092	NM_001037806 // NCKAP5L // NCK-associated protein 5-like // 12q13.12 // 57701 //	NCKAP5L	NM_001037806	0.560207	-1.78505	AA down vs CA
3687849	NM_033410 // ZNF764 // zinc finger protein 764 // 16p11.2 // 92595 /// NM_001172	ZNF764	NM_033410	0.560227	-1.78499	AA down vs CA
3851293	NM_001164276 // ZNF44 // zinc finger protein 44 // 19p13.2 // 51710 /// NM_01626	ZNF44	NM_001164276	0.560264	-1.78487	AA down vs CA
2488584	NM_003124 // SPR // sepiapterin reductase (7,8-dihydrobiopterin:NADP+ oxidoreduc	SPR	NM_003124	1.78435	1.78435	AA up vs CA
3188697	NM_001145001 // NEK6 // NIMA (never in mitosis gene a)-related kinase 6 // 9q33.	NEK6	NM_001145001	1.78421	1.78421	AA up vs CA
2342576	NM_000016 // ACADM // acyl-CoA dehydrogenase, C-4 to C-12 straight chain // 1p31	ACADM	NM_000016	1.78405	1.78405	AA up vs CA
3751541	NM_001085454 // GIT1 // G protein-coupled receptor kinase interacting ArfGAP 1 /	GIT1	NM_001085454	1.78404	1.78404	AA up vs CA
2535761	NM_002081 // GPC1 // glypican 1 // 2q35-q37 // 2817 /// NR_029702 // MIR149 // m	GPC1	NM_002081	0.560554	-1.78395	AA down vs CA
2950277	NM_006120 // HLA-DMA // major histocompatibility complex, class II, DM alpha //	HLA-DMA	NM_006120	1.78389	1.78389	AA up vs CA
2367892	NM_001122770 // ZBTB37 // zinc finger and BTB domain containing 37 // 1q25.1 //	ZBTB37	NM_001122770	0.560575	-1.78388	AA down vs CA
3333899	NM_004585 // RARRES3 // retinoic acid receptor responder (tazarotene induced) 3	RARRES3	NM_004585	1.78384	1.78384	AA up vs CA
3093259	NM_032509 // MAK16 // MAK16 homolog (S. cerevisiae) // 8p12 // 84549 /// NM_0011	MAK16	NM_032509	1.78375	1.78375	AA up vs CA
2447824	NM_025191 // EDEM3 // ER degradation enhancer, mannosidase alpha-like 3 // 1q25	EDEM3	NM_025191	1.78324	1.78324	AA up vs CA
2516967	NM_024501 // HOXD1 // homeobox D1 // 2q31.1 // 3231 /// ENST00000331462 // HOXD1	HOXD1	NM_024501	0.560917	-1.78279	AA down vs CA
2336456	NM_001042693 // FAM159A // family with sequence similarity 159, member A // 1p32	FAM159A	NM_001042693	0.560986	-1.78257	AA down vs CA
3076076	NM_207113 // SLC37A3 // solute carrier family 37 (glycerol-3-phosphate transport	SLC37A3	NM_207113	1.78241	1.78241	AA up vs CA
2685304	NM_000313 // PROS1 // protein S (alpha) // 3q11.2 // 5627 /// ENST00000394236 //	PROS1	NM_000313	1.78228	1.78228	AA up vs CA
2491336	NM_020122 // KCMF1 // potassium channel modulatory factor 1 // 2p11.2 // 56888 /	KCMF1	NM_020122	1.78185	1.78185	AA up vs CA
2376922	NM_004759 // MAPKAPK2 // mitogen-activated protein kinase-activated protein kina	MAPKAPK2	NM_004759	1.78126	1.78126	AA up vs CA
2480961	NM_002354 // EPCAM // epithelial cell adhesion molecule // 2p21 // 4072 /// ENST	EPCAM	NM_002354	1.78126	1.78126	AA up vs CA
3540068	NM_004857 // AKAP5 // A kinase (PRKA) anchor protein 5 // 14q21-q24 // 9495 ///	AKAP5	NM_004857	0.561516	-1.78089	AA down vs CA
3914771	NM_144770 // RBM11 // RNA binding motif protein 11 // 21q11 // 54033 /// ENST000	RBM11	NM_144770	0.561556	-1.78077	AA down vs CA
2429338	NM_001102396 // SIKE1 // suppressor of IKBKE 1 // 1p13.2 // 80143 /// NM_025073	SIKE1	NM_001102396	1.78071	1.78071	AA up vs CA
2808308	NM_153361 // MGC42105 // serine/threonine-protein kinase NIM1 // 5p12 // 167359	MGC42105	NM_153361	0.561585	-1.78067	AA down vs CA
2547751	NR_003143 // MYADML // myeloid-associated differentiation marker-like // 2p22.3	MYADML	NR_003143	0.561588	-1.78066	AA down vs CA
3821479	NM_152262 // ZNF439 // zinc finger protein 439 // 19p13.2 // 90594 /// NM_144566	ZNF439	NM_152262	0.561653	-1.78046	AA down vs CA
3856908	BC021822 // ZNF99 // zinc finger protein 99 // 19p12 // 7652	ZNF99	BC021822	0.561655	-1.78045	AA down vs CA
3956226	NM_002430 // MN1 // meningioma (disrupted in balanced translocation) 1 // 22q11|	MN1	NM_002430	0.56177	-1.78009	AA down vs CA
3438772	NR_003290 // EP400NL // EP400 N-terminal like // 12q24.33 // 347918 /// NM_01540	EP400NL	NR_003290	0.561808	-1.77997	AA down vs CA
3417161	NM_002868 // RAB5B // RAB5B, member RAS oncogene family // 12q13 // 5869 /// ENS	RAB5B	NM_002868	1.7796	1.7796	AA up vs CA
2947789	NM_030959 // OR12D3 // olfactory receptor, family 12, subfamily D, member 3 // 6	OR12D3	NM_030959	0.561965	-1.77947	AA down vs CA
3871644	NM_176820 // NLRP9 // NLR family, pyrin domain containing 9 // 19q13.42 // 33832	NLRP9	NM_176820	0.562014	-1.77932	AA down vs CA
3709153	NM_001080424 // KDM6B // lysine (K)-specific demethylase 6B // 17p13.1 // 23135	KDM6B	NM_001080424	0.562067	-1.77915	AA down vs CA
3619721	NM_133639 // RHOV // ras homolog gene family, member V // 15q13.3 // 171177 ///	RHOV	NM_133639	0.562131	-1.77894	AA down vs CA
2401275	NM_001102398 // HNRNPR // heterogeneous nuclear ribonucleoprotein R // 1p36.12 /	HNRNPR	NM_001102398	1.77853	1.77853	AA up vs CA
2474019	NM_020134 // DPYSL5 // dihydropyrimidinase-like 5 // 2p23.3 // 56896 /// ENST000	DPYSL5	NM_020134	0.562279	-1.77848	AA down vs CA
4017798	NM_012282 // KCNE1L // KCNE1-like // Xq22.3 // 23630 /// ENST00000372101 // KCNE	KCNE1L	NM_012282	0.562314	-1.77837	AA down vs CA
3756979	NM_006771 // KRT38 // keratin 38 // 17q12-q21 // 8687 /// NM_003770 // KRT37 //	KRT38	NM_006771	0.562368	-1.7782	AA down vs CA
2600037	NM_024506 // GLB1L // galactosidase, beta 1-like // 2q35 // 79411 /// ENST000002	GLB1L	NM_024506	0.562419	-1.77803	AA down vs CA
3721187	NM_033061 // KRTAP4-7 // keratin associated protein 4-7 // 17q21.2 // 100132476	KRTAP4-7	NM_033061	0.56246	-1.7779	AA down vs CA
3742400	NM_005022 // PFN1 // profilin 1 // 17p13.3 // 5216 /// ENST00000225655 // PFN1 /	PFN1	NM_005022	1.7777	1.7777	AA up vs CA
2641032	NM_013336 // SEC61A1 // Sec61 alpha 1 subunit (S. cerevisiae) // 3q21.3 // 29927	SEC61A1	NM_013336	1.77762	1.77762	AA up vs CA
3836044	NM_024707 // GEMIN7 // gem (nuclear organelle) associated protein 7 // 19q13.32	GEMIN7	NM_024707	1.77751	1.77751	AA up vs CA
3836841	NM_005184 // CALM3 // calmodulin 3 (phosphorylase kinase, delta) // 19q13.2-q13.	CALM3	NM_005184	1.77725	1.77725	AA up vs CA
3984633	NM_021637 // TMEM35 // transmembrane protein 35 // Xq22.1 // 59353 /// ENST00000	TMEM35	NM_021637	0.562703	-1.77714	AA down vs CA
3475764	NM_032554 // GPR81 // G protein-coupled receptor 81 // 12q24.31 // 27198 /// ENS	GPR81	NM_032554	1.77677	1.77677	AA up vs CA
2876361	NM_002653 // PITX1 // paired-like homeodomain 1 // 5q31 // 5307 /// ENST00000265	PITX1	NM_002653	0.562901	-1.77651	AA down vs CA
3053827	NR_026873 // NCRNA00174 // non-protein coding RNA 174 // 7q11.21 // 285908	NCRNA00174	NR_026873	0.562914	-1.77647	AA down vs CA
2691982	NR_026698 // KPNA1 // karyopherin alpha 1 (importin alpha 5) // 3q21 // 3836 ///	KPNA1	NR_026698	1.77613	1.77613	AA up vs CA
3189837	NM_007135 // ZNF79 // zinc finger protein 79 // 9q34 // 7633 /// ENST00000342483	ZNF79	NM_007135	0.563042	-1.77606	AA down vs CA
3570526	NM_003814 // ADAM20 // ADAM metallopeptidase domain 20 // 14q24.1 // 8748 /// EN	ADAM20	NM_003814	0.563072	-1.77597	AA down vs CA
3744958	NM_002903 // RCVRN // recoverin // 17p13.1 // 5957 /// ENST00000226193 // RCVRN	RCVRN	NM_002903	0.563096	-1.7759	AA down vs CA
2315554	NM_001130045 // TTLL10 // tubulin tyrosine ligase-like family, member 10 // 1p36	TTLL10	NM_001130045	0.563199	-1.77557	AA down vs CA
2674919	NM_002447 // MST1R // macrophage stimulating 1 receptor (c-met-related tyrosine	MST1R	NM_002447	0.563229	-1.77548	AA down vs CA
2604998	NM_024726 // IQCA1 // IQ motif containing with AAA domain 1 // 2q37.3 // 79781 /	IQCA1	NM_024726	0.56329	-1.77528	AA down vs CA
3285926	NR_026777 // ZNF37BP // zinc finger protein 37B, pseudogene // 10q11.21 // 10012	ZNF37BP	NR_026777	1.77518	1.77518	AA up vs CA
2319802	NM_002631 // PGD // phosphogluconate dehydrogenase // 1p36.22 // 5226 /// ENST00	PGD	NM_002631	1.77434	1.77434	AA up vs CA
2809455	---		---	0.563611	-1.77427	AA down vs CA
2563654	NM_004836 // EIF2AK3 // eukaryotic translation initiation factor 2-alpha kinase	EIF2AK3	NM_004836	1.77424	1.77424	AA up vs CA
3976450	NM_205856 // SPACA5 // sperm acrosome associated 5 // Xp11.23 // 389852 /// NM_0	SPACA5	NM_205856	0.563625	-1.77423	AA down vs CA
2641901	NM_007117 // TRH // thyrotropin-releasing hormone // 3q13.3-q21 // 7200 /// ENST	TRH	NM_007117	0.563676	-1.77407	AA down vs CA
3756630	NM_182497 // KRT40 // keratin 40 // 17q21.2 // 125115 /// ENST00000377755 // KRT	KRT40	NM_182497	0.56372	-1.77393	AA down vs CA
2408643	NM_001956 // EDN2 // endothelin 2 // 1p34 // 1907 /// ENST00000372587 // EDN2 //	EDN2	NM_001956	0.563739	-1.77387	AA down vs CA
3540136	NM_021979 // HSPA2 // heat shock 70kDa protein 2 // 14q24.1 // 3306 /// ENST0000	HSPA2	NM_021979	0.563787	-1.77372	AA down vs CA
3978579	NM_001039705 // TRO // trophinin // Xp11.22-p11.21 // 7216 /// NM_177556 // TRO	TRO	NM_001039705	0.563887	-1.7734	AA down vs CA
2784279	NM_021803 // IL21 // interleukin 21 // 4q26-q27 // 59067 /// ENST00000264497 //	IL21	NM_021803	0.563901	-1.77336	AA down vs CA
2411638	AF251047 // LOC100128922 // connexin // 1p33 // 100128922	LOC100128922	AF251047	0.563938	-1.77324	AA down vs CA
2731831	NM_003715 // USO1 // USO1 vesicle docking protein homolog (yeast) // 4q21.1 // 8	USO1	NM_003715	1.77304	1.77304	AA up vs CA
3076882	NM_176817 // TAS2R38 // taste receptor, type 2, member 38 // 7q34 // 5726 /// EN	TAS2R38	NM_176817	0.564048	-1.7729	AA down vs CA
3995885	NM_005393 // PLXNB3 // plexin B3 // Xq28 // 5365 /// NM_001163257 // PLXNB3 // p	PLXNB3	NM_005393	0.564084	-1.77279	AA down vs CA
3204558	BC004406 // KIAA1539 // KIAA1539 // 9p13.3 // 80256 /// ENST00000378561 // KIAA1	KIAA1539	BC004406	0.56412	-1.77267	AA down vs CA
2751385	NM_173872 // CLCN3 // chloride channel 3 // 4q33 // 1182 /// NM_001829 // CLCN3	CLCN3	NM_173872	1.77261	1.77261	AA up vs CA
3758692	NM_005374 // MPP2 // membrane protein, palmitoylated 2 (MAGUK p55 subfamily memb	MPP2	NM_005374	0.56416	-1.77255	AA down vs CA
3434413	NM_014868 // RNF10 // ring finger protein 10 // 12q24.31 // 9921 /// ENST0000032	RNF10	NM_014868	1.77251	1.77251	AA up vs CA
2950823	NM_001142883 // IP6K3 // inositol hexakisphosphate kinase 3 // 6p21.31 // 117283	IP6K3	NM_001142883	0.564205	-1.7724	AA down vs CA
3428225	NM_005123 // NR1H4 // nuclear receptor subfamily 1, group H, member 4 // 12q23.1	NR1H4	NM_005123	0.564221	-1.77235	AA down vs CA
2596975	NM_005210 // CRYGB // crystallin, gamma B // 2q33-q35 // 1419 /// ENST0000026098	CRYGB	NM_005210	0.564222	-1.77235	AA down vs CA
3625761	NM_018365 // MNS1 // meiosis-specific nuclear structural 1 // 15q21.3 // 55329 /	MNS1	NM_018365	0.564364	-1.7719	AA down vs CA
3279698	NM_001081 // CUBN // cubilin (intrinsic factor-cobalamin receptor) // 10p12.31 /	CUBN	NM_001081	0.564409	-1.77176	AA down vs CA
3942940	CR456348 // FLJ20464 // hypothetical protein FLJ20464 // 22q12.2 // 54944 /// AK	FLJ20464	CR456348	0.564459	-1.77161	AA down vs CA
3331129	NM_001005323 // OR5AK2 // olfactory receptor, family 5, subfamily AK, member 2 /	OR5AK2	NM_001005323	0.564493	-1.7715	AA down vs CA
3821392	NM_152356 // ZNF491 // zinc finger protein 491 // 19p13.2 // 126069 /// ENST0000	ZNF491	NM_152356	0.564584	-1.77121	AA down vs CA
3417075	NM_201444 // DGKA // diacylglycerol kinase, alpha 80kDa // 12q13.3 // 1606 /// N	DGKA	NM_201444	1.77084	1.77084	AA up vs CA
3089285	NM_001722 // POLR3D // polymerase (RNA) III (DNA directed) polypeptide D, 44kDa	POLR3D	NM_001722	1.7707	1.7707	AA up vs CA
3439378	NM_015394 // ZNF10 // zinc finger protein 10 // 12q24.33 // 7556 /// ENST0000041	ZNF10	NM_015394	0.564753	-1.77069	AA down vs CA
3593339	NM_001001556 // GALK2 // galactokinase 2 // 15q21.1-q21.2 // 2585 /// NM_002044	GALK2	NM_001001556	1.77042	1.77042	AA up vs CA
2440385	NM_016382 // CD244 // CD244 molecule, natural killer cell receptor 2B4 // 1q23.3	CD244	NM_016382	0.564875	-1.7703	AA down vs CA
3381063	NM_030813 // CLPB // ClpB caseinolytic peptidase B homolog (E. coli) // 11q13.4	CLPB	NM_030813	1.76982	1.76982	AA up vs CA
2447486	NM_203454 // APOBEC4 // apolipoprotein B mRNA editing enzyme, catalytic polypept	APOBEC4	NM_203454	0.565083	-1.76965	AA down vs CA
3373962	NM_004223 // UBE2L6 // ubiquitin-conjugating enzyme E2L 6 // 11q12 // 9246 /// N	UBE2L6	NM_004223	1.7694	1.7694	AA up vs CA
2405192	NM_003680 // YARS // tyrosyl-tRNA synthetase // 1p35.1 // 8565 /// ENST000003734	YARS	NM_003680	1.7692	1.7692	AA up vs CA
3831006	NM_024509 // LRFN3 // leucine rich repeat and fibronectin type III domain contai	LRFN3	NM_024509	0.565261	-1.76909	AA down vs CA
3362719	NM_001418 // EIF4G2 // eukaryotic translation initiation factor 4 gamma, 2 // 11	EIF4G2	NM_001418	1.76855	1.76855	AA up vs CA
3280787	NM_207371 // C10orf140 // chromosome 10 open reading frame 140 // 10p12.31 // 38	C10orf140	NM_207371	0.565514	-1.7683	AA down vs CA
3946495	NM_005297 // MCHR1 // melanin-concentrating hormone receptor 1 // 22q13.2 // 284	MCHR1	NM_005297	0.565519	-1.76829	AA down vs CA
3803290	NM_022751 // FAM59A // family with sequence similarity 59, member A // 18q12.1 /	FAM59A	NM_022751	0.565525	-1.76827	AA down vs CA
3401381	NM_006675 // TSPAN9 // tetraspanin 9 // 12p13.33-p13.32 // 10867 /// NM_00116832	TSPAN9	NM_006675	0.565601	-1.76803	AA down vs CA
2641769	NM_000539 // RHO // rhodopsin // 3q21-q24 // 6010 /// ENST00000296271 // RHO //	RHO	NM_000539	0.56561	-1.768	AA down vs CA
3695648	NM_013304 // ZDHHC1 // zinc finger, DHHC-type containing 1 // 16q22.1 // 29800 /	ZDHHC1	NM_013304	0.565642	-1.7679	AA down vs CA
3119516	NM_030895 // ZNF696 // zinc finger protein 696 // 8q24.3 // 79943 /// ENST000003	ZNF696	NM_030895	0.565647	-1.76789	AA down vs CA
2907568	NM_057161 // KLHDC3 // kelch domain containing 3 // 6p21.1 // 116138 /// ENST000	KLHDC3	NM_057161	1.7676	1.7676	AA up vs CA
2333574	NM_057091 // ARTN // artemin // 1p33-p32 // 9048 /// NM_057090 // ARTN // artemi	ARTN	NM_057091	0.565773	-1.76749	AA down vs CA
2953798	NM_018561 // USP49 // ubiquitin specific peptidase 49 // 6p21 // 25862 /// ENST0	USP49	NM_018561	0.565818	-1.76735	AA down vs CA
3396198	NM_019055 // ROBO4 // roundabout homolog 4, magic roundabout (Drosophila) // 11q	ROBO4	NM_019055	0.565824	-1.76733	AA down vs CA
3634811	NM_004390 // CTSH // cathepsin H // 15q25.1 // 1512 /// ENST00000220166 // CTSH	CTSH	NM_004390	1.7672	1.7672	AA up vs CA
2904485	NM_152753 // SCUBE3 // signal peptide, CUB domain, EGF-like 3 // 6p21.3 // 22266	SCUBE3	NM_152753	0.565911	-1.76706	AA down vs CA
2704733	NM_032487 // ARPM1 // actin related protein M1 // 3q26.2 // 84517 /// NR_001566	ARPM1	NM_032487	0.565934	-1.76699	AA down vs CA
2540157	NM_002539 // ODC1 // ornithine decarboxylase 1 // 2p25 // 4953 /// NR_028374 //	ODC1	NM_002539	1.76618	1.76618	AA up vs CA
3100690	NM_173688 // NKAIN3 // Na+/K+ transporting ATPase interacting 3 // 8q12.3 // 286	NKAIN3	NM_173688	0.566215	-1.76611	AA down vs CA
2359691	NM_176823 // S100A7A // S100 calcium binding protein A7A // 1q21.3 // 338324 ///	S100A7A	NM_176823	0.56629	-1.76588	AA down vs CA
3326252	NM_024662 // NAT10 // N-acetyltransferase 10 (GCN5-related) // 11p13 // 55226 //	NAT10	NM_024662	1.76557	1.76557	AA up vs CA
3011409	NM_138290 // RUNDC3B // RUN domain containing 3B // 7q21.12 // 154661 /// NM_001	RUNDC3B	NM_138290	0.566435	-1.76543	AA down vs CA
3120567	NM_145754 // KIFC2 // kinesin family member C2 // 8q24.3 // 90990 /// NM_003923	KIFC2	NM_145754	0.56655	-1.76507	AA down vs CA
3464860	NM_001946 // DUSP6 // dual specificity phosphatase 6 // 12q22-q23 // 1848 /// NM	DUSP6	NM_001946	1.76501	1.76501	AA up vs CA
2985026	NM_005299 // GPR31 // G protein-coupled receptor 31 // 6q27 // 2853 /// ENST0000	GPR31	NM_005299	0.566725	-1.76452	AA down vs CA
3564790	NM_014584 // ERO1L // ERO1-like (S. cerevisiae) // 14q22.1 // 30001 /// ENST0000	ERO1L	NM_014584	1.76447	1.76447	AA up vs CA
3767230	NM_199340 // LRRC37A3 // leucine rich repeat containing 37, member A3 // 17q24.1	LRRC37A3	NM_199340	0.566746	-1.76446	AA down vs CA
3457752	NM_005419 // STAT2 // signal transducer and activator of transcription 2, 113kDa	STAT2	NM_005419	1.76429	1.76429	AA up vs CA
2730465	NM_212557 // AMTN // amelotin // 4q13.3 // 401138 /// ENST00000339336 // AMTN //	AMTN	NM_212557	0.566862	-1.7641	AA down vs CA
3835544	NM_182490 // ZNF227 // zinc finger protein 227 // --- // 7770 /// ENST0000031304	ZNF227	NM_182490	0.566891	-1.76401	AA down vs CA
3622239	NM_144565 // DUOXA1 // dual oxidase maturation factor 1 // 15q21.1 // 90527 ///	DUOXA1	NM_144565	0.566912	-1.76394	AA down vs CA
2688049	NM_032579 // RETNLB // resistin like beta // 3q13.1 // 84666 /// ENST00000295755	RETNLB	NM_032579	0.566934	-1.76387	AA down vs CA
2878630	NM_031947 // SLC25A2 // solute carrier family 25 (mitochondrial carrier; ornithi	SLC25A2	NM_031947	0.566989	-1.7637	AA down vs CA
2953711	NM_007162 // TFEB // transcription factor EB // 6p21 // 7942 /// NM_001167827 //	TFEB	NM_007162	0.566991	-1.7637	AA down vs CA
2820622	NM_032290 // ANKRD32 // ankyrin repeat domain 32 // 5q15 // 84250 /// ENST000002	ANKRD32	NM_032290	0.567039	-1.76355	AA down vs CA
3557614	NM_003917 // AP1G2 // adaptor-related protein complex 1, gamma 2 subunit // 14q1	AP1G2	NM_003917	1.76347	1.76347	AA up vs CA
2620538	NM_015340 // LARS2 // leucyl-tRNA synthetase 2, mitochondrial // 3p21.3 // 23395	LARS2	NM_015340	1.76336	1.76336	AA up vs CA
2802963	NM_012304 // FBXL7 // F-box and leucine-rich repeat protein 7 // 5p15.1 // 23194	FBXL7	NM_012304	0.567167	-1.76315	AA down vs CA
2375810	NM_014827 // ZC3H11A // zinc finger CCCH-type containing 11A // 1q32.1 // 9877 /	ZC3H11A	NM_014827	1.76312	1.76312	AA up vs CA
3858794	NM_032816 // CCDC123 // coiled-coil domain containing 123 // 19q13.11 // 84902 /	CCDC123	NM_032816	0.567191	-1.76308	AA down vs CA
2335014	NM_178134 // CYP4Z1 // cytochrome P450, family 4, subfamily Z, polypeptide 1 //	CYP4Z1	NM_178134	0.567329	-1.76265	AA down vs CA
3406229	NM_006205 // PDE6H // phosphodiesterase 6H, cGMP-specific, cone, gamma // 12p13	PDE6H	NM_006205	0.567424	-1.76235	AA down vs CA
3824874	NM_006332 // IFI30 // interferon, gamma-inducible protein 30 // 19p13.1 // 10437	IFI30	NM_006332	1.76224	1.76224	AA up vs CA
2876479	NM_004893 // H2AFY // H2A histone family, member Y // 5q31.1 // 9555 /// NM_1386	H2AFY	NM_004893	1.76203	1.76203	AA up vs CA
3507686	BC027486 // LOC728437 // hCG2020170 // 13q12.3 // 728437	LOC728437	BC027486	0.567597	-1.76181	AA down vs CA
2439861	NM_001135050 // IGSF9 // immunoglobulin superfamily, member 9 // 1q22-q23 // 575	IGSF9	NM_001135050	0.567627	-1.76172	AA down vs CA
3568485	NM_001024858 // SPTB // spectrin, beta, erythrocytic // 14q23-q24.2 // 6710 ///	SPTB	NM_001024858	0.567883	-1.76093	AA down vs CA
2672857	NM_003074 // SMARCC1 // SWI/SNF related, matrix associated, actin dependent regu	SMARCC1	NM_003074	1.76092	1.76092	AA up vs CA
2614120	NM_002948 // RPL15 // ribosomal protein L15 // 3p24.2 // 6138 /// ENST0000030783	RPL15	NM_002948	1.76086	1.76086	AA up vs CA
2324884	NM_000491 // C1QB // complement component 1, q subcomponent, B chain // 1p36.12	C1QB	NM_000491	1.76076	1.76076	AA up vs CA
2538000	NM_002936 // RNASEH1 // ribonuclease H1 // 2p25 // 246243 /// ENST00000315212 //	RNASEH1	NM_002936	1.76072	1.76072	AA up vs CA
3367917	NM_181807 // DCDC1 // doublecortin domain containing 1 // 11p13 // 341019 /// EN	DCDC1	NM_181807	0.567962	-1.76068	AA down vs CA
3980887	NM_001145408 // NONO // non-POU domain containing, octamer-binding // Xq13.1 //	NONO	NM_001145408	1.76058	1.76058	AA up vs CA
2783316	NM_014822 // SEC24D // SEC24 family, member D (S. cerevisiae) // 4q26 // 9871 //	SEC24D	NM_014822	1.76046	1.76046	AA up vs CA
2830818	NM_016606 // REEP2 // receptor accessory protein 2 // 5q31 // 51308 /// ENST0000	REEP2	NM_016606	0.568078	-1.76032	AA down vs CA
3142362	NM_002677 // PMP2 // peripheral myelin protein 2 // 8q21.3-q22.1 // 5375 /// NM_	PMP2	NM_002677	0.568215	-1.7599	AA down vs CA
2844082	NM_025158 // RUFY1 // RUN and FYVE domain containing 1 // 5q35.3 // 80230 /// NM	RUFY1	NM_025158	1.75989	1.75989	AA up vs CA
3222404	AB021923 // C9orf27 // chromosome 9 open reading frame 27 // 9q31.3 // 58483 ///	C9orf27	AB021923	0.56827	-1.75973	AA down vs CA
3751590	NM_032854 // CORO6 // coronin 6 // 17q11.2 // 84940 /// ENST00000345068 // CORO6	CORO6	NM_032854	0.568298	-1.75964	AA down vs CA
3839880	NR_024330 // NCRNA00085 // non-protein coding RNA 85 // 19q13.41 // 147650 /// A	NCRNA00085	NR_024330	0.568319	-1.75957	AA down vs CA
2442698	NM_003851 // CREG1 // cellular repressor of E1A-stimulated genes 1 // 1q24 // 88	CREG1	NM_003851	1.75941	1.75941	AA up vs CA
2344393	NM_182948 // PRKACB // protein kinase, cAMP-dependent, catalytic, beta // 1p36.1	PRKACB	NM_182948	1.7594	1.7594	AA up vs CA
3626312	NM_003888 // ALDH1A2 // aldehyde dehydrogenase 1 family, member A2 // 15q21.3 //	ALDH1A2	NM_003888	0.568377	-1.75939	AA down vs CA
2550755	NM_022436 // ABCG5 // ATP-binding cassette, sub-family G (WHITE), member 5 // 2p	ABCG5	NM_022436	0.568382	-1.75938	AA down vs CA
3403773	NM_080387 // CLEC4D // C-type lectin domain family 4, member D // 12p13.31 // 33	CLEC4D	NM_080387	0.568421	-1.75926	AA down vs CA
3784999	NM_020776 // KIAA1328 // KIAA1328 // 18q12.2 // 57536 /// ENST00000280020 // KIA	KIAA1328	NM_020776	0.568491	-1.75904	AA down vs CA
2382467	NM_152495 // CNIH3 // cornichon homolog 3 (Drosophila) // 1q42.12 // 149111 ///	CNIH3	NM_152495	0.568501	-1.75901	AA down vs CA
2436338	NM_181715 // CRTC2 // CREB regulated transcription coactivator 2 // 1q21.3 // 20	CRTC2	NM_181715	0.568577	-1.75878	AA down vs CA
3395765	NM_001005188 // OR6X1 // olfactory receptor, family 6, subfamily X, member 1 //	OR6X1	NM_001005188	0.568693	-1.75842	AA down vs CA
3910260	NM_006526 // ZNF217 // zinc finger protein 217 // 20q13.2 // 7764 /// ENST000003	ZNF217	NM_006526	1.75833	1.75833	AA up vs CA
2999710	NM_014063 // DBNL // drebrin-like // 7p13 // 28988 /// NM_001014436 // DBNL // d	DBNL	NM_014063	1.7583	1.7583	AA up vs CA
3643552	NM_001053 // SSTR5 // somatostatin receptor 5 // 16p13.3 // 6755 /// NM_00117256	SSTR5	NM_001053	0.568837	-1.75797	AA down vs CA
3887117	NM_001127695 // CTSA // cathepsin A // 20q13.1 // 5476 /// NM_000308 // CTSA //	CTSA	NM_001127695	1.75789	1.75789	AA up vs CA
2981912	NM_003379 // EZR // ezrin // 6q25.3 // 7430 /// NM_001111077 // EZR // ezrin //	EZR	NM_003379	1.75785	1.75785	AA up vs CA
3435490	NM_003677 // DENR // density-regulated protein // 12q24.31 // 8562 /// ENST00000	DENR	NM_003677	1.75775	1.75775	AA up vs CA
3216356	NM_001077181 // CDC14B // CDC14 cell division cycle 14 homolog B (S. cerevisiae)	CDC14B	NM_001077181	0.568933	-1.75768	AA down vs CA
2331679	NM_001136493 // MFSD2A // major facilitator superfamily domain containing 2A //	MFSD2A	NM_001136493	0.569025	-1.75739	AA down vs CA
2948810	NM_014069 // PSORS1C2 // psoriasis susceptibility 1 candidate 2 // 6p21.3 // 170	PSORS1C2	NM_014069	0.569124	-1.75709	AA down vs CA
2563536	NM_001443 // FABP1 // fatty acid binding protein 1, liver // 2p11 // 2168 /// EN	FABP1	NM_001443	0.569128	-1.75707	AA down vs CA
3976609	NM_177439 // FTSJ1 // FtsJ homolog 1 (E. coli) // Xp11.23 // 24140 /// NM_012280	FTSJ1	NM_177439	1.7568	1.7568	AA up vs CA
3761420	NM_004502 // HOXB7 // homeobox B7 // 17q21.3 // 3217 /// NR_029582 // MIR196A1 /	HOXB7	NM_004502	0.569268	-1.75664	AA down vs CA
3066496	NM_020725 // ATXN7L1 // ataxin 7-like 1 // 7q22.3 // 222255 /// NM_138495 // ATX	ATXN7L1	NM_020725	0.569286	-1.75659	AA down vs CA
2382898	NM_002296 // LBR // lamin B receptor // 1q42.1 // 3930 /// NM_194442 // LBR // l	LBR	NM_002296	0.569352	-1.75638	AA down vs CA
2625546	NM_181727 // SPATA12 // spermatogenesis associated 12 // 3p14.3 // 353324 /// EN	SPATA12	NM_181727	0.569364	-1.75635	AA down vs CA
3873480	NM_001136566 // RAD21L1 // RAD21-like 1 (S. pombe) // 20p13 // 642636 /// NM_014	RAD21L1	NM_001136566	0.569413	-1.7562	AA down vs CA
2903258	NM_020056 // HLA-DQA2 // major histocompatibility complex, class II, DQ alpha 2	HLA-DQA2	NM_020056	1.75581	1.75581	AA up vs CA
2545478	NM_006569 // CGREF1 // cell growth regulator with EF-hand domain 1 // 2p23.3 //	CGREF1	NM_006569	1.75579	1.75579	AA up vs CA
3837232	NM_178511 // PRR24 // proline rich 24 // 19q13.32 // 255783 /// ENST00000422073	PRR24	NM_178511	0.569636	-1.75551	AA down vs CA
2585400	NM_002977 // SCN9A // sodium channel, voltage-gated, type IX, alpha subunit // 2	SCN9A	NM_002977	0.569664	-1.75542	AA down vs CA
3231157	NM_138462 // ZMYND19 // zinc finger, MYND-type containing 19 // 9q34.3 // 116225	ZMYND19	NM_138462	0.569732	-1.75521	AA down vs CA
2952927	NM_001135105 // KCNK16 // potassium channel, subfamily K, member 16 // 6p21.2-p2	KCNK16	NM_001135105	0.569797	-1.75501	AA down vs CA
3193227	NR_015427 // NCRNA00094 // non-protein coding RNA 94 // 9q34 // 266655 /// BC053	NCRNA00094	NR_015427	0.569802	-1.755	AA down vs CA
3221571	NM_145051 // RNF183 // ring finger protein 183 // 9q32 // 138065 /// ENST0000047	RNF183	NM_145051	0.569826	-1.75492	AA down vs CA
3417809	NM_005967 // NAB2 // NGFI-A binding protein 2 (EGR1 binding protein 2) // 12q13.	NAB2	NM_005967	0.569926	-1.75461	AA down vs CA
3655961	NM_002720 // PPP4C // protein phosphatase 4, catalytic subunit // 16p11.2 // 553	PPP4C	NM_002720	1.75423	1.75423	AA up vs CA
3455426	NM_005555 // KRT6B // keratin 6B // 12q12-q13 // 3854 /// NM_173086 // KRT6C //	KRT6B	NM_005555	0.570086	-1.75412	AA down vs CA
3163818	NM_003026 // SH3GL2 // SH3-domain GRB2-like 2 // 9p22 // 6456 /// ENST0000038060	SH3GL2	NM_003026	0.570107	-1.75406	AA down vs CA
3969633	NM_002063 // GLRA2 // glycine receptor, alpha 2 // Xp22.1-p21.3 // 2742 /// NM_0	GLRA2	NM_002063	0.570156	-1.7539	AA down vs CA
3946380	NM_015705 // SGSM3 // small G protein signaling modulator 3 // 22q13.1-q13.2 //	SGSM3	NM_015705	1.75339	1.75339	AA up vs CA
2880051	NM_181674 // PPP2R2B // protein phosphatase 2, regulatory subunit B, beta // 5q3	PPP2R2B	NM_181674	0.570356	-1.75329	AA down vs CA
3634529	NM_015162 // ACSBG1 // acyl-CoA synthetase bubblegum family member 1 // 15q23-q2	ACSBG1	NM_015162	0.570496	-1.75286	AA down vs CA
3922333	NR_027273 // C21orf121 // chromosome 21 open reading frame 121 // 21q22.3 // 150	C21orf121	NR_027273	0.570721	-1.75217	AA down vs CA
2780060	NM_139173 // NHEDC1 // Na+/H+ exchanger domain containing 1 // 4q24 // 150159 //	NHEDC1	NM_139173	0.570734	-1.75213	AA down vs CA
2437871	NM_003145 // SSR2 // signal sequence receptor, beta (translocon-associated prote	SSR2	NM_003145	1.75201	1.75201	AA up vs CA
2948926	NM_005514 // HLA-B // major histocompatibility complex, class I, B // 6p21.3 //	HLA-B	NM_005514	1.75157	1.75157	AA up vs CA
2503257	NM_002193 // INHBB // inhibin, beta B // 2cen-q13 // 3625 /// ENST00000295228 //	INHBB	NM_002193	0.571067	-1.75111	AA down vs CA
3892456	NM_198935 // SS18L1 // synovial sarcoma translocation gene on chromosome 18-like	SS18L1	NM_198935	0.571086	-1.75105	AA down vs CA
2565369	NR_026875 // NEURL3 // neuralized homolog 3 (Drosophila) pseudogene // 2q11.2 //	NEURL3	NR_026875	0.571102	-1.751	AA down vs CA
2544781	NM_021907 // DTNB // dystrobrevin, beta // 2p24 // 1838 /// NM_033147 // DTNB //	DTNB	NM_021907	1.7508	1.7508	AA up vs CA
3063685	NM_005916 // MCM7 // minichromosome maintenance complex component 7 // 7q21.3-q2	MCM7	NM_005916	1.75067	1.75067	AA up vs CA
3539070	NM_001530 // HIF1A // hypoxia inducible factor 1, alpha subunit (basic helix-loo	HIF1A	NM_001530	1.75054	1.75054	AA up vs CA
2844908	NM_152547 // BTNL9 // butyrophilin-like 9 // 5q35.3 // 153579 /// ENST0000032770	BTNL9	NM_152547	0.57131	-1.75036	AA down vs CA
2444283	NM_003326 // TNFSF4 // tumor necrosis factor (ligand) superfamily, member 4 // 1	TNFSF4	NM_003326	0.571401	-1.75008	AA down vs CA
2905404	NM_002648 // PIM1 // pim-1 oncogene // 6p21.2 // 5292 /// ENST00000373509 // PIM	PIM1	NM_002648	1.75005	1.75005	AA up vs CA
3883207	NM_006404 // PROCR // protein C receptor, endothelial // 20q11.2 // 10544 /// EN	PROCR	NM_006404	0.571456	-1.74991	AA down vs CA
2402447	NM_001145454 // STMN1 // stathmin 1 // 1p36.11 // 3925 /// ENST00000426559 // ST	STMN1	NM_001145454	0.571521	-1.74972	AA down vs CA
3358393	NM_016564 // CEND1 // cell cycle exit and neuronal differentiation 1 // 11p15.5	CEND1	NM_016564	0.571525	-1.7497	AA down vs CA
2398073	NM_018994 // FBXO42 // F-box protein 42 // 1p36.23-p36.11 // 54455 /// ENST00000	FBXO42	NM_018994	1.74949	1.74949	AA up vs CA
2788926	NM_000901 // NR3C2 // nuclear receptor subfamily 3, group C, member 2 // 4q31.1	NR3C2	NM_000901	0.571598	-1.74948	AA down vs CA
3589947	NM_014952 // BAHD1 // bromo adjacent homology domain containing 1 // 15q15.1 //	BAHD1	NM_014952	0.571633	-1.74938	AA down vs CA
2458701	NM_022735 // ACBD3 // acyl-CoA binding domain containing 3 // 1q42.12 // 64746 /	ACBD3	NM_022735	1.74935	1.74935	AA up vs CA
3542445	NM_003813 // ADAM21 // ADAM metallopeptidase domain 21 // 14q24.1 // 8747 /// NR	ADAM21	NM_003813	0.571729	-1.74908	AA down vs CA
2949993	NM_019602 // BTNL2 // butyrophilin-like 2 (MHC class II associated) // 6p21.3 //	BTNL2	NM_019602	0.57173	-1.74908	AA down vs CA
3819130	NR_026707 // CLEC4M // C-type lectin domain family 4, member M // 19p13 // 10332	CLEC4M	NR_026707	0.571783	-1.74892	AA down vs CA
2446137	NM_014625 // NPHS2 // nephrosis 2, idiopathic, steroid-resistant (podocin) // 1q	NPHS2	NM_014625	0.571787	-1.7489	AA down vs CA
2505833	NM_032995 // ARHGEF4 // Rho guanine nucleotide exchange factor (GEF) 4 // 2q22 /	ARHGEF4	NM_032995	0.571814	-1.74882	AA down vs CA
3218489	NM_001004481 // OR13C2 // olfactory receptor, family 13, subfamily C, member 2 /	OR13C2	NM_001004481	0.571831	-1.74877	AA down vs CA
2757427	NM_012318 // LETM1 // leucine zipper-EF-hand containing transmembrane protein 1	LETM1	NM_012318	1.74873	1.74873	AA up vs CA
3995088	NM_033085 // FATE1 // fetal and adult testis expressed 1 // Xq28 // 89885 /// EN	FATE1	NM_033085	0.571903	-1.74855	AA down vs CA
2728224	NM_006947 // SRP72 // signal recognition particle 72kDa // 4q11 // 6731 /// ENST	SRP72	NM_006947	1.74794	1.74794	AA up vs CA
2791063	NM_001334 // CTSO // cathepsin O // 4q32.1 // 1519 /// ENST00000281527 // CTSO /	CTSO	NM_001334	1.74776	1.74776	AA up vs CA
2440143	NM_001098398 // COPA // coatomer protein complex, subunit alpha // 1q23-q25 // 1	COPA	NM_001098398	1.74737	1.74737	AA up vs CA
2899110	NM_000410 // HFE // hemochromatosis // 6p21.3 // 3077 /// NM_139006 // HFE // he	HFE	NM_000410	0.572291	-1.74736	AA down vs CA
2772566	NM_144646 // IGJ // immunoglobulin J polypeptide, linker protein for immunoglobu	IGJ	NM_144646	1.74728	1.74728	AA up vs CA
3330700	NM_001004124 // OR4P4 // olfactory receptor, family 4, subfamily P, member 4 //	OR4P4	NM_001004124	0.572322	-1.74727	AA down vs CA
2400220	NM_005216 // DDOST // dolichyl-diphosphooligosaccharide--protein glycosyltransfe	DDOST	NM_005216	1.74692	1.74692	AA up vs CA
2679796	NM_025075 // THOC7 // THO complex 7 homolog (Drosophila) // 3p14.1 // 80145 ///	THOC7	NM_025075	1.74679	1.74679	AA up vs CA
2677388	NM_015576 // ERC2 // ELKS/RAB6-interacting/CAST family member 2 // 3p14.3 // 260	ERC2	NM_015576	0.572494	-1.74674	AA down vs CA
2456746	NM_004446 // EPRS // glutamyl-prolyl-tRNA synthetase // 1q41 // 2058 /// ENST000	EPRS	NM_004446	1.74663	1.74663	AA up vs CA
3665846	NM_020457 // THAP11 // THAP domain containing 11 // 16q22.1 // 57215 /// ENST000	THAP11	NM_020457	1.74656	1.74656	AA up vs CA
3643143	NM_145294 // WDR90 // WD repeat domain 90 // 16p13.3 // 197335 /// ENST000002938	WDR90	NM_145294	0.572569	-1.74651	AA down vs CA
2907459	NM_006586 // CNPY3 // canopy 3 homolog (zebrafish) // 6pter-p12.1 // 10695 /// E	CNPY3	NM_006586	1.74598	1.74598	AA up vs CA
2828135	NM_181705 // LYRM7 // Lyrm7 homolog (mouse) // 5q23.3 // 90624 /// ENST000003793	LYRM7	NM_181705	0.572747	-1.74597	AA down vs CA
3955627	NM_182492 // LRP5L // low density lipoprotein receptor-related protein 5-like //	LRP5L	NM_182492	1.7459	1.7459	AA up vs CA
2797771	NM_173553 // TRIML2 // tripartite motif family-like 2 // 4q35.2 // 205860 /// EN	TRIML2	NM_173553	0.572799	-1.74581	AA down vs CA
2495806	NM_145212 // MRPL30 // mitochondrial ribosomal protein L30 // 2q11.2 // 51263 //	MRPL30	NM_145212	1.74548	1.74548	AA up vs CA
3377091	NM_004579 // MAP4K2 // mitogen-activated protein kinase kinase kinase kinase 2 /	MAP4K2	NM_004579	0.572919	-1.74545	AA down vs CA
2656650	NM_000412 // HRG // histidine-rich glycoprotein // 3q27 // 3273 /// ENST00000232	HRG	NM_000412	0.572936	-1.7454	AA down vs CA
3044597	NM_001191059 // PDE1C // phosphodiesterase 1C, calmodulin-dependent 70kDa // 7p1	PDE1C	NM_001191059	0.572939	-1.74539	AA down vs CA
2566383	BC047722 // C2orf64 // chromosome 2 open reading frame 64 // 2q11.2 // 493753 //	C2orf64	BC047722	1.74537	1.74537	AA up vs CA
3771800	NM_003016 // SRSF2 // serine/arginine-rich splicing factor 2 // 17q25.1 // 6427	SRSF2	NM_003016	1.74536	1.74536	AA up vs CA
3326067	NM_012194 // C11orf41 // chromosome 11 open reading frame 41 // 11p13 // 25758 /	C11orf41	NM_012194	0.572964	-1.74531	AA down vs CA
3983324	NM_019117 // KLHL4 // kelch-like 4 (Drosophila) // Xq21.3 // 56062 /// NM_057162	KLHL4	NM_019117	0.573019	-1.74514	AA down vs CA
3864944	NM_001102597 // CEACAM20 // carcinoembryonic antigen-related cell adhesion molec	CEACAM20	NM_001102597	1.74509	1.74509	AA up vs CA
2491615	NM_005911 // MAT2A // methionine adenosyltransferase II, alpha // 2p11.2 // 4144	MAT2A	NM_005911	1.74495	1.74495	AA up vs CA
2794584	NM_005277 // GPM6A // glycoprotein M6A // 4q34 // 2823 /// NM_201591 // GPM6A //	GPM6A	NM_005277	0.57331	-1.74426	AA down vs CA
3183238	NM_207647 // FSD1L // fibronectin type III and SPRY domain containing 1-like //	FSD1L	NM_207647	0.573311	-1.74425	AA down vs CA
2445982	NM_004673 // ANGPTL1 // angiopoietin-like 1 // 1q25.2 // 9068 /// ENST0000023481	ANGPTL1	NM_004673	0.573336	-1.74418	AA down vs CA
3837602	NM_022142 // ELSPBP1 // epididymal sperm binding protein 1 // 19q13.33 // 64100	ELSPBP1	NM_022142	0.573374	-1.74406	AA down vs CA
2461717	NM_014765 // TOMM20 // translocase of outer mitochondrial membrane 20 homolog (y	TOMM20	NM_014765	1.74385	1.74385	AA up vs CA
2662087	NM_014850 // SRGAP3 // SLIT-ROBO Rho GTPase activating protein 3 // 3p25.3 // 99	SRGAP3	NM_014850	0.573453	-1.74382	AA down vs CA
3994710	NM_005491 // MAMLD1 // mastermind-like domain containing 1 // Xq28 // 10046 ///	MAMLD1	NM_005491	0.57346	-1.7438	AA down vs CA
2923257	NR_002730 // BRD7P3 // bromodomain containing 7 pseudogene 3 // 6q22.31 // 23629	BRD7P3	NR_002730	0.573467	-1.74378	AA down vs CA
3702293	NM_003791 // MBTPS1 // membrane-bound transcription factor peptidase, site 1 //	MBTPS1	NM_003791	1.74367	1.74367	AA up vs CA
2332091	NM_004700 // KCNQ4 // potassium voltage-gated channel, KQT-like subfamily, membe	KCNQ4	NM_004700	0.573543	-1.74355	AA down vs CA
3757745	NM_001142623 // GHDC // GH3 domain containing // 17q21.2 // 84514 /// NR_024573	GHDC	NM_001142623	1.74318	1.74318	AA up vs CA
3986397	NM_001169154 // CXorf41 // chromosome X open reading frame 41 // Xq22.3 // 13921	CXorf41	NM_001169154	0.573665	-1.74318	AA down vs CA
3364878	NM_000352 // ABCC8 // ATP-binding cassette, sub-family C (CFTR/MRP), member 8 //	ABCC8	NM_000352	0.573731	-1.74298	AA down vs CA
2675150	NM_007312 // HYAL1 // hyaluronoglucosaminidase 1 // 3p21.3-p21.2 // 3373 /// NM_	HYAL1	NM_007312	0.573741	-1.74295	AA down vs CA
2903470	NM_006979 // SLC39A7 // solute carrier family 39 (zinc transporter), member 7 //	SLC39A7	NM_006979	1.74281	1.74281	AA up vs CA
3740126	NR_024058 // YWHAE // tyrosine 3-monooxygenase/tryptophan 5-monooxygenase activa	YWHAE	NR_024058	1.74272	1.74272	AA up vs CA
3474935	NM_016237 // ANAPC5 // anaphase promoting complex subunit 5 // 12q24.31 // 51433	ANAPC5	NM_016237	1.74266	1.74266	AA up vs CA
3592054	NM_182985 // TRIM69 // tripartite motif-containing 69 // 15q21.1 // 140691 /// N	TRIM69	NM_182985	0.573885	-1.74251	AA down vs CA
3503747	NM_006001 // TUBA3C // tubulin, alpha 3c // 13q11 // 7278 /// NM_080386 // TUBA3	TUBA3C	NM_006001	1.74241	1.74241	AA up vs CA
3608113	NM_003870 // IQGAP1 // IQ motif containing GTPase activating protein 1 // 15q26.	IQGAP1	NM_003870	1.74183	1.74183	AA up vs CA
2520069	NM_001042521 // C2orf88 // chromosome 2 open reading frame 88 // 2q32.2 // 84281	C2orf88	NM_001042521	0.574144	-1.74172	AA down vs CA
3231835	NR_027709 // C10orf110 // chromosome 10 open reading frame 110 // 10p15.3 // 558	C10orf110	NR_027709	0.574168	-1.74165	AA down vs CA
3928529	NM_181608 // KRTAP19-2 // keratin associated protein 19-2 // 21q22.1 // 337969 /	KRTAP19-2	NM_181608	0.574204	-1.74154	AA down vs CA
3934983	NR_028082 // NCRNA00175 // non-protein coding RNA 175 // 21q22.3 // 378832 /// N	NCRNA00175	NR_028082	0.57426	-1.74137	AA down vs CA
3917938	NM_014586 // HUNK // hormonally up-regulated Neu-associated kinase // 21q22.1 //	HUNK	NM_014586	0.574267	-1.74135	AA down vs CA
3653619	NM_016309 // LCMT1 // leucine carboxyl methyltransferase 1 // 16p12.1 // 51451 /	LCMT1	NM_016309	1.74132	1.74132	AA up vs CA
3836534	NM_004497 // FOXA3 // forkhead box A3 // 19q13.2-q13.4 // 3171 /// ENST000003021	FOXA3	NM_004497	0.574364	-1.74106	AA down vs CA
3923257	NM_003681 // PDXK // pyridoxal (pyridoxine, vitamin B6) kinase // 21q22.3 // 856	PDXK	NM_003681	1.74102	1.74102	AA up vs CA
2903219	XM_003120411 // LOC100510059 // HLA class II histocompatibility antigen, DQ alph	LOC100510059	XM_003120411	1.74096	1.74096	AA up vs CA
2694617	NM_020701 // ISY1 // ISY1 splicing factor homolog (S. cerevisiae) // 3q21.3 // 5	ISY1	NM_020701	1.74069	1.74069	AA up vs CA
3636216	NM_004644 // AP3B2 // adaptor-related protein complex 3, beta 2 subunit // 15q /	AP3B2	NM_004644	0.574584	-1.74039	AA down vs CA
2488252	NM_001130978 // DYSF // dysferlin, limb girdle muscular dystrophy 2B (autosomal	DYSF	NM_001130978	0.574698	-1.74004	AA down vs CA
2897576	NM_001949 // E2F3 // E2F transcription factor 3 // 6p22 // 1871 /// ENST00000346	E2F3	NM_001949	0.574703	-1.74003	AA down vs CA
2622063	AY078383 // STGC3 // hypothetical STGC3 // 3p21 // 474171	STGC3	AY078383	0.574722	-1.73997	AA down vs CA
3579269	NM_001144995 // CCDC85C // coiled-coil domain containing 85C // 14q32.31 // 3177	CCDC85C	NM_001144995	0.574738	-1.73992	AA down vs CA
3287767	NM_002900 // RBP3 // retinol binding protein 3, interstitial // 10q11.2 // 5949	RBP3	NM_002900	0.574739	-1.73992	AA down vs CA
2360939	NR_034180 // POU5F1P4 // POU class 5 homeobox 1 pseudogene 4 // 1q22 // 645682 /	POU5F1P4	NR_034180	0.574753	-1.73988	AA down vs CA
2677922	NM_001142733 // ASB14 // ankyrin repeat and SOCS box-containing 14 // 3p21.1 //	ASB14	NM_001142733	0.574798	-1.73974	AA down vs CA
3157639	AY358690 // EEF1D // eukaryotic translation elongation factor 1 delta (guanine n	EEF1D	AY358690	0.574822	-1.73967	AA down vs CA
2408955	NM_021109 // TMSB4X // thymosin beta 4, X-linked // Xq21.3-q22 // 7114 /// NM_18	TMSB4X	NM_021109	0.574844	-1.7396	AA down vs CA
3566910	NM_022571 // GPR135 // G protein-coupled receptor 135 // 14q23.1 // 64582 /// EN	GPR135	NM_022571	0.574858	-1.73956	AA down vs CA
3212232	NM_017576 // KIF27 // kinesin family member 27 // 9q21.32 // 55582 /// ENST00000	KIF27	NM_017576	0.574863	-1.73955	AA down vs CA
2735759	NM_007351 // MMRN1 // multimerin 1 // 4q22 // 22915 /// ENST00000394980 // MMRN1	MMRN1	NM_007351	0.57492	-1.73937	AA down vs CA
2792127	NM_000909 // NPY1R // neuropeptide Y receptor Y1 // 4q31.3-q32 // 4886 /// ENST0	NPY1R	NM_000909	0.57492	-1.73937	AA down vs CA
2888698	NM_006816 // LMAN2 // lectin, mannose-binding 2 // 5q35.3 // 10960 /// ENST00000	LMAN2	NM_006816	1.73921	1.73921	AA up vs CA
2702642	---		---	0.574975	-1.73921	AA down vs CA
3852407	NM_002918 // RFX1 // regulatory factor X, 1 (influences HLA class II expression)	RFX1	NM_002918	0.575025	-1.73905	AA down vs CA
3173673	NM_003558 // PIP5K1B // phosphatidylinositol-4-phosphate 5-kinase, type I, beta	PIP5K1B	NM_003558	0.57503	-1.73904	AA down vs CA
3557811	NM_002818 // PSME2 // proteasome (prosome, macropain) activator subunit 2 (PA28	PSME2	NM_002818	1.73885	1.73885	AA up vs CA
2607110	NM_005336 // HDLBP // high density lipoprotein binding protein // 2q37.3 // 3069	HDLBP	NM_005336	1.73818	1.73818	AA up vs CA
2725381	NM_006345 // SLC30A9 // solute carrier family 30 (zinc transporter), member 9 //	SLC30A9	NM_006345	1.73799	1.73799	AA up vs CA
3063273	NM_015545 // PTCD1 // pentatricopeptide repeat domain 1 // 7q22.1 // 26024 /// E	PTCD1	NM_015545	0.575416	-1.73787	AA down vs CA
3088048	AY176665 // NSAP11 // nervous system abundant protein 11 // 8p22 // 100131275	NSAP11	AY176665	0.575516	-1.73757	AA down vs CA
[truncated: 141 more rows]

## Sheet: 66 genes_overlapped
Supplemental Table S3d. 66 overlapped genes in the comparison of significant genes in AA cancer vs. AA matched normal control and CA cancer vs. CA matached normal control.
[truncated: 67 more rows]

[truncated: 5 more sheets: 133 genes_overlapped, 69 genes_overlapped, unique 980genes AAtumor, unique 740genes CAtumor, unique 996genes AAvsCA]
