# Supplementary material for: Androgen Receptor-Target Genes in African American Prostate Cancer Disparities
Source: Hindawi journal article supplement (doi:10.1155/2013/763569), 2013-01-01
Supplement: f1 [file 763569.f1.zip › 763569.f1/Supplemental Table S5.xlsx]

## Sheet: 382ARgene_annotation_Query
Supplemental Table S5. 382 putative AR target genes (containing 549 AR binding sequences) in AA prostate cancer.
Transcript Cluster ID	Gene Symbol	gene_assignment	AR binding sequences (located within 1-kb upstream region from start of transcription of the gene)	Dissimilarity (%)	Alignments of gene	Ratio of Gene Expression (AA vs CA)	Log2 Ratio of Gene Expression (AA vs CA)	Fold-Change (AA vs CA)	Regulation (AA vs CA)	Gene Ontology Biological Process	Gene Ontology Cellular Component	Gene Ontology Molecular Function	Pathway
3735505	AANAT	NM_001088 // AANAT // aralkylamine N-acetyltransferase // 17q25 // 15 /// NM_001	GGGCTGTCC	4.99562	chr17:74463650-74466198 (+) // 98.92 // q25.1	0.520798	-0.941204	-1.92013	AA down vs CA	0007623 // circadian rhythm // inferred from electronic annotation /// 0007623 // circadian rhythm // traceable author statement /// 0008152 // metabolic process // inferred from electronic annotation /// 0009416 // response to light stimulus // inferred from electronic annotation /// 0010043 // response to zinc ion // inferred from electronic annotation /// 0014070 // response to organic cyclic …	0005737 // cytoplasm // inferred from electronic annotation /// 0005829 // cytosol // not recorded	0004059 // aralkylamine N-acetyltransferase activity // not recorded /// 0004059 // aralkylamine N-acetyltransferase activity // inferred from electronic annotation /// 0004059 // aralkylamine N-acetyltransferase activity // traceable author statement /// 0004060 // arylamine N-acetyltransferase activity // inferred from electronic annotation /// 0008080 // N-acetyltransferase activity // inferre…	Biogenic_Amine_Synthesis // GenMAPP
3364878	ABCC8	NM_000352 // ABCC8 // ATP-binding cassette, sub-family C (CFTR/MRP), member 8 //	AAAATGTCC	3.59934	chr11:17414431-17498449 (+) // 98.0 // p15.1	0.573731	-0.801554	-1.74298	AA down vs CA	0005975 // carbohydrate metabolic process // non-traceable author statement /// 0006810 // transport // inferred from electronic annotation /// 0006813 // potassium ion transport // inferred from electronic annotation /// 0006813 // potassium ion transport // traceable author statement /// 0009268 // response to pH // inferred from electronic annotation /// 0010043 // response to zinc ion // infe…	0005886 // plasma membrane // inferred from electronic annotation /// 0016020 // membrane // inferred from electronic annotation /// 0016021 // integral to membrane // inferred from electronic annotation /// 0030672 // synaptic vesicle membrane // inferred from electronic annotation /// 0042383 // sarcolemma // inferred from electronic annotation	0000166 // nucleotide binding // inferred from electronic annotation /// 0004872 // receptor activity // inferred from electronic annotation /// 0005267 // potassium channel activity // inferred from electronic annotation /// 0005524 // ATP binding // inferred from electronic annotation /// 0005524 // ATP binding // traceable author statement /// 0008281 // sulfonylurea receptor activity // infer…	---
3364878	ABCC8	NM_000352 // ABCC8 // ATP-binding cassette, sub-family C (CFTR/MRP), member 8 //	AAAATGTCC	3.59934	chr11:17414492-17498358 (-) // 99.94 // p15.1	0.573731	-0.801554	-1.74298	AA down vs CA	0005975 // carbohydrate metabolic process // non-traceable author statement /// 0006810 // transport // inferred from electronic annotation /// 0006813 // potassium ion transport // inferred from electronic annotation /// 0006813 // potassium ion transport // traceable author statement /// 0009268 // response to pH // inferred from electronic annotation /// 0010043 // response to zinc ion // infe…	0005886 // plasma membrane // inferred from electronic annotation /// 0016020 // membrane // inferred from electronic annotation /// 0016021 // integral to membrane // inferred from electronic annotation /// 0030672 // synaptic vesicle membrane // inferred from electronic annotation /// 0042383 // sarcolemma // inferred from electronic annotation	0000166 // nucleotide binding // inferred from electronic annotation /// 0004872 // receptor activity // inferred from electronic annotation /// 0005267 // potassium channel activity // inferred from electronic annotation /// 0005524 // ATP binding // inferred from electronic annotation /// 0005524 // ATP binding // traceable author statement /// 0008281 // sulfonylurea receptor activity // infer…	---
2746024	ABCE1	NM_002940 // ABCE1 // ATP-binding cassette, sub-family E (OABP), member 1 // 4q3	ACACTGTCC	1.72747	chr4:146002813-146050586 (+) // 93.46 // q31.21	2.04402	1.03141	2.04402	AA up vs CA	0006401 // RNA catabolic process // traceable author statement /// 0009615 // response to virus // traceable author statement /// 0044419 // interspecies interaction between organisms // inferred from electronic annotation	0005737 // cytoplasm // inferred from direct assay /// 0005737 // cytoplasm // inferred from electronic annotation /// 0005739 // mitochondrion // inferred from direct assay /// 0005739 // mitochondrion // inferred from electronic annotation	0000166 // nucleotide binding // inferred from electronic annotation /// 0005524 // ATP binding // inferred from electronic annotation /// 0008428 // ribonuclease inhibitor activity // traceable author statement /// 0009055 // electron carrier activity // inferred from electronic annotation /// 0016887 // ATPase activity // inferred from electronic annotation /// 0017111 // nucleoside-triphosphat…	---
2746024	ABCE1	NM_002940 // ABCE1 // ATP-binding cassette, sub-family E (OABP), member 1 // 4q3	TGAATGTCC	2.48409	chr4:146002813-146050586 (+) // 93.46 // q31.21	2.04402	1.03141	2.04402	AA up vs CA	0006401 // RNA catabolic process // traceable author statement /// 0009615 // response to virus // traceable author statement /// 0044419 // interspecies interaction between organisms // inferred from electronic annotation	0005737 // cytoplasm // inferred from direct assay /// 0005737 // cytoplasm // inferred from electronic annotation /// 0005739 // mitochondrion // inferred from direct assay /// 0005739 // mitochondrion // inferred from electronic annotation	0000166 // nucleotide binding // inferred from electronic annotation /// 0005524 // ATP binding // inferred from electronic annotation /// 0008428 // ribonuclease inhibitor activity // traceable author statement /// 0009055 // electron carrier activity // inferred from electronic annotation /// 0016887 // ATPase activity // inferred from electronic annotation /// 0017111 // nucleoside-triphosphat…	---
2746024	ABCE1	NM_002940 // ABCE1 // ATP-binding cassette, sub-family E (OABP), member 1 // 4q3	ACACTGTCC	1.72747	chr4:146019485-146050331 (+) // 90.53 // q31.21 /// chr7:23600448-23603983 (-) // 88.0 // p15.3	2.04402	1.03141	2.04402	AA up vs CA	0006401 // RNA catabolic process // traceable author statement /// 0009615 // response to virus // traceable author statement /// 0044419 // interspecies interaction between organisms // inferred from electronic annotation	0005737 // cytoplasm // inferred from direct assay /// 0005737 // cytoplasm // inferred from electronic annotation /// 0005739 // mitochondrion // inferred from direct assay /// 0005739 // mitochondrion // inferred from electronic annotation	0000166 // nucleotide binding // inferred from electronic annotation /// 0005524 // ATP binding // inferred from electronic annotation /// 0008428 // ribonuclease inhibitor activity // traceable author statement /// 0009055 // electron carrier activity // inferred from electronic annotation /// 0016887 // ATPase activity // inferred from electronic annotation /// 0017111 // nucleoside-triphosphat…	---
2746024	ABCE1	NM_002940 // ABCE1 // ATP-binding cassette, sub-family E (OABP), member 1 // 4q3	TGAATGTCC	2.48409	chr4:146019485-146050331 (+) // 90.53 // q31.21 /// chr7:23600448-23603983 (-) // 88.0 // p15.3	2.04402	1.03141	2.04402	AA up vs CA	0006401 // RNA catabolic process // traceable author statement /// 0009615 // response to virus // traceable author statement /// 0044419 // interspecies interaction between organisms // inferred from electronic annotation	0005737 // cytoplasm // inferred from direct assay /// 0005737 // cytoplasm // inferred from electronic annotation /// 0005739 // mitochondrion // inferred from direct assay /// 0005739 // mitochondrion // inferred from electronic annotation	0000166 // nucleotide binding // inferred from electronic annotation /// 0005524 // ATP binding // inferred from electronic annotation /// 0008428 // ribonuclease inhibitor activity // traceable author statement /// 0009055 // electron carrier activity // inferred from electronic annotation /// 0016887 // ATPase activity // inferred from electronic annotation /// 0017111 // nucleoside-triphosphat…	---
2550755	ABCG5	NM_022436 // ABCG5 // ATP-binding cassette, sub-family G (WHITE), member 5 // 2p	AAATTGTCC	3.38289	chr2:44039976-44065924 (-) // 100.0 // p21	0.568382	-0.815067	-1.75938	AA down vs CA	0006810 // transport // inferred from electronic annotation /// 0007584 // response to nutrient // inferred from electronic annotation /// 0007588 // excretion // inferred from genetic interaction /// 0007588 // excretion // inferred from electronic annotation /// 0010212 // response to ionizing radiation // inferred from electronic annotation /// 0010949 // negative regulation of intestinal phyt…	0005624 // membrane fraction // inferred from electronic annotation /// 0005886 // plasma membrane // not recorded /// 0016020 // membrane // inferred from electronic annotation /// 0016021 // integral to membrane // inferred from electronic annotation /// 0016324 // apical plasma membrane // inferred from mutant phenotype /// 0016324 // apical plasma membrane // inferred from electronic annotati…	0000166 // nucleotide binding // inferred from electronic annotation /// 0005515 // protein binding // inferred from physical interaction /// 0005524 // ATP binding // inferred from direct assay /// 0005524 // ATP binding // inferred from electronic annotation /// 0016887 // ATPase activity // inferred from direct assay /// 0016887 // ATPase activity // inferred from electronic annotation /// 001…	---
3773932	ACTG1	NM_001614 // ACTG1 // actin, gamma 1 // 17q25 // 71 /// ENST00000331925 // ACTG1	GGGCTGTCC	4.99562	chr1:27651826-27653034 (+) // 90.69 // p36.11 /// chr17:79476996-79478351 (-) // 98.34 // q25.3	1.94512	0.959859	1.94512	AA up vs CA	0006928 // cellular component movement // traceable author statement /// 0007409 // axonogenesis // inferred from electronic annotation /// 0051592 // response to calcium ion // inferred from electronic annotation	0005737 // cytoplasm // inferred from electronic annotation /// 0005737 // cytoplasm // traceable author statement /// 0005829 // cytosol // not recorded /// 0005856 // cytoskeleton // traceable author statement /// 0005856 // cytoskeleton // inferred from electronic annotation /// 0030424 // axon // inferred from electronic annotation /// 0030529 // ribonucleoprotein complex // inferred from dir…	0000166 // nucleotide binding // inferred from electronic annotation /// 0005200 // structural constituent of cytoskeleton // inferred by curator /// 0005200 // structural constituent of cytoskeleton // traceable author statement /// 0005515 // protein binding // inferred from physical interaction /// 0005515 // protein binding // inferred from electronic annotation /// 0005524 // ATP binding // …	Smooth_muscle_contraction // GenMAPP /// Striated_muscle_contraction // GenMAPP
3773932	ACTG1	NM_001614 // ACTG1 // actin, gamma 1 // 17q25 // 71 /// ENST00000331925 // ACTG1	GGGCTGTCC	4.99562	chr17:79476998-79479827 (-) // 100.0 // q25.3	1.94512	0.959859	1.94512	AA up vs CA	0006928 // cellular component movement // traceable author statement /// 0007409 // axonogenesis // inferred from electronic annotation /// 0051592 // response to calcium ion // inferred from electronic annotation	0005737 // cytoplasm // inferred from electronic annotation /// 0005737 // cytoplasm // traceable author statement /// 0005829 // cytosol // not recorded /// 0005856 // cytoskeleton // traceable author statement /// 0005856 // cytoskeleton // inferred from electronic annotation /// 0030424 // axon // inferred from electronic annotation /// 0030529 // ribonucleoprotein complex // inferred from dir…	0000166 // nucleotide binding // inferred from electronic annotation /// 0005200 // structural constituent of cytoskeleton // inferred by curator /// 0005200 // structural constituent of cytoskeleton // traceable author statement /// 0005515 // protein binding // inferred from physical interaction /// 0005515 // protein binding // inferred from electronic annotation /// 0005524 // ATP binding // …	Smooth_muscle_contraction // GenMAPP /// Striated_muscle_contraction // GenMAPP
3773932	ACTG1	NM_001614 // ACTG1 // actin, gamma 1 // 17q25 // 71 /// ENST00000331925 // ACTG1	GGGCTGTCC	4.99562	chr17:79476996-79477482 (-) // 56.98 // q25.3	1.94512	0.959859	1.94512	AA up vs CA	0006928 // cellular component movement // traceable author statement /// 0007409 // axonogenesis // inferred from electronic annotation /// 0051592 // response to calcium ion // inferred from electronic annotation	0005737 // cytoplasm // inferred from electronic annotation /// 0005737 // cytoplasm // traceable author statement /// 0005829 // cytosol // not recorded /// 0005856 // cytoskeleton // traceable author statement /// 0005856 // cytoskeleton // inferred from electronic annotation /// 0030424 // axon // inferred from electronic annotation /// 0030529 // ribonucleoprotein complex // inferred from dir…	0000166 // nucleotide binding // inferred from electronic annotation /// 0005200 // structural constituent of cytoskeleton // inferred by curator /// 0005200 // structural constituent of cytoskeleton // traceable author statement /// 0005515 // protein binding // inferred from physical interaction /// 0005515 // protein binding // inferred from electronic annotation /// 0005524 // ATP binding // …	Smooth_muscle_contraction // GenMAPP /// Striated_muscle_contraction // GenMAPP
3773932	ACTG1	NM_001614 // ACTG1 // actin, gamma 1 // 17q25 // 71 /// ENST00000331925 // ACTG1	GGGCTGTCC	4.99562	chr17:79476996-79478129 (-) // 85.65 // q25.3	1.94512	0.959859	1.94512	AA up vs CA	0006928 // cellular component movement // traceable author statement /// 0007409 // axonogenesis // inferred from electronic annotation /// 0051592 // response to calcium ion // inferred from electronic annotation	0005737 // cytoplasm // inferred from electronic annotation /// 0005737 // cytoplasm // traceable author statement /// 0005829 // cytosol // not recorded /// 0005856 // cytoskeleton // traceable author statement /// 0005856 // cytoskeleton // inferred from electronic annotation /// 0030424 // axon // inferred from electronic annotation /// 0030529 // ribonucleoprotein complex // inferred from dir…	0000166 // nucleotide binding // inferred from electronic annotation /// 0005200 // structural constituent of cytoskeleton // inferred by curator /// 0005200 // structural constituent of cytoskeleton // traceable author statement /// 0005515 // protein binding // inferred from physical interaction /// 0005515 // protein binding // inferred from electronic annotation /// 0005524 // ATP binding // …	Smooth_muscle_contraction // GenMAPP /// Striated_muscle_contraction // GenMAPP
3773932	ACTG1	NM_001614 // ACTG1 // actin, gamma 1 // 17q25 // 71 /// ENST00000331925 // ACTG1	GGGCTGTCC	4.99562	chr17:79476996-79478284 (-) // 95.29 // q25.3	1.94512	0.959859	1.94512	AA up vs CA	0006928 // cellular component movement // traceable author statement /// 0007409 // axonogenesis // inferred from electronic annotation /// 0051592 // response to calcium ion // inferred from electronic annotation	0005737 // cytoplasm // inferred from electronic annotation /// 0005737 // cytoplasm // traceable author statement /// 0005829 // cytosol // not recorded /// 0005856 // cytoskeleton // traceable author statement /// 0005856 // cytoskeleton // inferred from electronic annotation /// 0030424 // axon // inferred from electronic annotation /// 0030529 // ribonucleoprotein complex // inferred from dir…	0000166 // nucleotide binding // inferred from electronic annotation /// 0005200 // structural constituent of cytoskeleton // inferred by curator /// 0005200 // structural constituent of cytoskeleton // traceable author statement /// 0005515 // protein binding // inferred from physical interaction /// 0005515 // protein binding // inferred from electronic annotation /// 0005524 // ATP binding // …	Smooth_muscle_contraction // GenMAPP /// Striated_muscle_contraction // GenMAPP
3773932	ACTG1	NM_001614 // ACTG1 // actin, gamma 1 // 17q25 // 71 /// ENST00000331925 // ACTG1	GGGCTGTCC	4.99562	chr17:79476996-79478078 (-) // 95.73 // q25.3	1.94512	0.959859	1.94512	AA up vs CA	0006928 // cellular component movement // traceable author statement /// 0007409 // axonogenesis // inferred from electronic annotation /// 0051592 // response to calcium ion // inferred from electronic annotation	0005737 // cytoplasm // inferred from electronic annotation /// 0005737 // cytoplasm // traceable author statement /// 0005829 // cytosol // not recorded /// 0005856 // cytoskeleton // traceable author statement /// 0005856 // cytoskeleton // inferred from electronic annotation /// 0030424 // axon // inferred from electronic annotation /// 0030529 // ribonucleoprotein complex // inferred from dir…	0000166 // nucleotide binding // inferred from electronic annotation /// 0005200 // structural constituent of cytoskeleton // inferred by curator /// 0005200 // structural constituent of cytoskeleton // traceable author statement /// 0005515 // protein binding // inferred from physical interaction /// 0005515 // protein binding // inferred from electronic annotation /// 0005524 // ATP binding // …	Smooth_muscle_contraction // GenMAPP /// Striated_muscle_contraction // GenMAPP
3773932	ACTG1	NM_001614 // ACTG1 // actin, gamma 1 // 17q25 // 71 /// ENST00000331925 // ACTG1	GGGCTGTCC	4.99562	chr17:79476996-79477559 (-) // 92.48 // q25.3	1.94512	0.959859	1.94512	AA up vs CA	0006928 // cellular component movement // traceable author statement /// 0007409 // axonogenesis // inferred from electronic annotation /// 0051592 // response to calcium ion // inferred from electronic annotation	0005737 // cytoplasm // inferred from electronic annotation /// 0005737 // cytoplasm // traceable author statement /// 0005829 // cytosol // not recorded /// 0005856 // cytoskeleton // traceable author statement /// 0005856 // cytoskeleton // inferred from electronic annotation /// 0030424 // axon // inferred from electronic annotation /// 0030529 // ribonucleoprotein complex // inferred from dir…	0000166 // nucleotide binding // inferred from electronic annotation /// 0005200 // structural constituent of cytoskeleton // inferred by curator /// 0005200 // structural constituent of cytoskeleton // traceable author statement /// 0005515 // protein binding // inferred from physical interaction /// 0005515 // protein binding // inferred from electronic annotation /// 0005524 // ATP binding // …	Smooth_muscle_contraction // GenMAPP /// Striated_muscle_contraction // GenMAPP
3773932	ACTG1	NM_001614 // ACTG1 // actin, gamma 1 // 17q25 // 71 /// ENST00000331925 // ACTG1	GGGCTGTCC	4.99562	chr17:79476998-79479781 (-) // 98.8 // q25.3	1.94512	0.959859	1.94512	AA up vs CA	0006928 // cellular component movement // traceable author statement /// 0007409 // axonogenesis // inferred from electronic annotation /// 0051592 // response to calcium ion // inferred from electronic annotation	0005737 // cytoplasm // inferred from electronic annotation /// 0005737 // cytoplasm // traceable author statement /// 0005829 // cytosol // not recorded /// 0005856 // cytoskeleton // traceable author statement /// 0005856 // cytoskeleton // inferred from electronic annotation /// 0030424 // axon // inferred from electronic annotation /// 0030529 // ribonucleoprotein complex // inferred from dir…	0000166 // nucleotide binding // inferred from electronic annotation /// 0005200 // structural constituent of cytoskeleton // inferred by curator /// 0005200 // structural constituent of cytoskeleton // traceable author statement /// 0005515 // protein binding // inferred from physical interaction /// 0005515 // protein binding // inferred from electronic annotation /// 0005524 // ATP binding // …	Smooth_muscle_contraction // GenMAPP /// Striated_muscle_contraction // GenMAPP
3336801	ADRBK1	NM_001619 // ADRBK1 // adrenergic, beta, receptor kinase 1 // 11q13.1 // 156 ///	GGACAGTGA	0.86373	chr11:67034157-67052936 (+) // 99.86 // q13.2	1.86659	0.900405	1.86659	AA up vs CA	0002026 // regulation of the force of heart contraction // inferred from electronic annotation /// 0002029 // desensitization of G-protein coupled receptor protein signaling pathway // inferred from sequence or structural similarity /// 0002029 // desensitization of G-protein coupled receptor protein signaling pathway // inferred from electronic annotation /// 0003108 // negative regulation of th…	0005624 // membrane fraction // inferred from direct assay /// 0005624 // membrane fraction // inferred from electronic annotation /// 0005625 // soluble fraction // traceable author statement /// 0005737 // cytoplasm // inferred from direct assay /// 0005829 // cytosol // not recorded /// 0005886 // plasma membrane // not recorded /// 0005901 // caveola // inferred from electronic annotation ///…	0000166 // nucleotide binding // inferred from electronic annotation /// 0004672 // protein kinase activity // inferred from sequence or structural similarity /// 0004672 // protein kinase activity // inferred from electronic annotation /// 0004674 // protein serine/threonine kinase activity // inferred from electronic annotation /// 0004703 // G-protein coupled receptor kinase activity // inferr…	---
3336801	ADRBK1	NM_001619 // ADRBK1 // adrenergic, beta, receptor kinase 1 // 11q13.1 // 156 ///	GGACAGTGA	0.86373	chr11:67034099-67054357 (+) // 97.78 // q13.2	1.86659	0.900405	1.86659	AA up vs CA	0002026 // regulation of the force of heart contraction // inferred from electronic annotation /// 0002029 // desensitization of G-protein coupled receptor protein signaling pathway // inferred from sequence or structural similarity /// 0002029 // desensitization of G-protein coupled receptor protein signaling pathway // inferred from electronic annotation /// 0003108 // negative regulation of th…	0005624 // membrane fraction // inferred from direct assay /// 0005624 // membrane fraction // inferred from electronic annotation /// 0005625 // soluble fraction // traceable author statement /// 0005737 // cytoplasm // inferred from direct assay /// 0005829 // cytosol // not recorded /// 0005886 // plasma membrane // not recorded /// 0005901 // caveola // inferred from electronic annotation ///…	0000166 // nucleotide binding // inferred from electronic annotation /// 0004672 // protein kinase activity // inferred from sequence or structural similarity /// 0004672 // protein kinase activity // inferred from electronic annotation /// 0004674 // protein serine/threonine kinase activity // inferred from electronic annotation /// 0004703 // G-protein coupled receptor kinase activity // inferr…	---
3336801	ADRBK1	NM_001619 // ADRBK1 // adrenergic, beta, receptor kinase 1 // 11q13.1 // 156 ///	GGACAGTGA	0.86373	chr11:67034099-67054357 (+) // 88.49 // q13.2	1.86659	0.900405	1.86659	AA up vs CA	0002026 // regulation of the force of heart contraction // inferred from electronic annotation /// 0002029 // desensitization of G-protein coupled receptor protein signaling pathway // inferred from sequence or structural similarity /// 0002029 // desensitization of G-protein coupled receptor protein signaling pathway // inferred from electronic annotation /// 0003108 // negative regulation of th…	0005624 // membrane fraction // inferred from direct assay /// 0005624 // membrane fraction // inferred from electronic annotation /// 0005625 // soluble fraction // traceable author statement /// 0005737 // cytoplasm // inferred from direct assay /// 0005829 // cytosol // not recorded /// 0005886 // plasma membrane // not recorded /// 0005901 // caveola // inferred from electronic annotation ///…	0000166 // nucleotide binding // inferred from electronic annotation /// 0004672 // protein kinase activity // inferred from sequence or structural similarity /// 0004672 // protein kinase activity // inferred from electronic annotation /// 0004674 // protein serine/threonine kinase activity // inferred from electronic annotation /// 0004703 // G-protein coupled receptor kinase activity // inferr…	---
3540068	AKAP5	NM_004857 // AKAP5 // A kinase (PRKA) anchor protein 5 // 14q21-q24 // 9495 ///	GGAATGTCC	1.62036	chr14:64933824-64936425 (+) // 84.84 // q23.3	0.561516	-0.832601	-1.78089	AA down vs CA	0001934 // positive regulation of protein phosphorylation // inferred from electronic annotation /// 0006605 // protein targeting // inferred from electronic annotation /// 0007165 // signal transduction // inferred from electronic annotation /// 0007165 // signal transduction // non-traceable author statement /// 0007268 // synaptic transmission // traceable author statement /// 0010524 // posit…	0005737 // cytoplasm // inferred from electronic annotation /// 0005829 // cytosol // not recorded /// 0005886 // plasma membrane // not recorded /// 0005886 // plasma membrane // inferred from electronic annotation /// 0005886 // plasma membrane // non-traceable author statement /// 0014069 // postsynaptic density // inferred from electronic annotation /// 0016020 // membrane // inferred from el…	0001664 // G-protein-coupled receptor binding // inferred from electronic annotation /// 0003779 // actin binding // inferred from electronic annotation /// 0005515 // protein binding // inferred from physical interaction /// 0005515 // protein binding // inferred from electronic annotation /// 0005516 // calmodulin binding // inferred from electronic annotation /// 0008179 // adenylate cyclase b…	G_Protein_Signaling // GenMAPP
3474935	ANAPC5	NM_016237 // ANAPC5 // anaphase promoting complex subunit 5 // 12q24.31 // 51433	GGTCTGTCC	4.99562	chr12:121746049-121785686 (-) // 95.39 // q24.31	1.74266	0.801291	1.74266	AA up vs CA	0000086 // G2/M transition of mitotic cell cycle // traceable author statement /// 0000090 // mitotic anaphase // traceable author statement /// 0006511 // ubiquitin-dependent protein catabolic process // traceable author statement /// 0007049 // cell cycle // inferred from electronic annotation /// 0007067 // mitosis // inferred from electronic annotation /// 0031145 // anaphase-promoting comple…	0005654 // nucleoplasm // not recorded /// 0005680 // anaphase-promoting complex // inferred from direct assay /// 0005680 // anaphase-promoting complex // traceable author statement /// 0005829 // cytosol // not recorded	0004842 // ubiquitin-protein ligase activity // traceable author statement /// 0005488 // binding // inferred from electronic annotation	---
3474935	ANAPC5	NM_016237 // ANAPC5 // anaphase promoting complex subunit 5 // 12q24.31 // 51433	GGTCTGTCC	4.99562	chr12:121746159-121790265 (-) // 94.82 // q24.31	1.74266	0.801291	1.74266	AA up vs CA	0000086 // G2/M transition of mitotic cell cycle // traceable author statement /// 0000090 // mitotic anaphase // traceable author statement /// 0006511 // ubiquitin-dependent protein catabolic process // traceable author statement /// 0007049 // cell cycle // inferred from electronic annotation /// 0007067 // mitosis // inferred from electronic annotation /// 0031145 // anaphase-promoting comple…	0005654 // nucleoplasm // not recorded /// 0005680 // anaphase-promoting complex // inferred from direct assay /// 0005680 // anaphase-promoting complex // traceable author statement /// 0005829 // cytosol // not recorded	0004842 // ubiquitin-protein ligase activity // traceable author statement /// 0005488 // binding // inferred from electronic annotation	---
3474935	ANAPC5	NM_016237 // ANAPC5 // anaphase promoting complex subunit 5 // 12q24.31 // 51433	GGTCTGTCC	4.99562	chr12:121746160-121790198 (-) // 98.87 // q24.31	1.74266	0.801291	1.74266	AA up vs CA	0000086 // G2/M transition of mitotic cell cycle // traceable author statement /// 0000090 // mitotic anaphase // traceable author statement /// 0006511 // ubiquitin-dependent protein catabolic process // traceable author statement /// 0007049 // cell cycle // inferred from electronic annotation /// 0007067 // mitosis // inferred from electronic annotation /// 0031145 // anaphase-promoting comple…	0005654 // nucleoplasm // not recorded /// 0005680 // anaphase-promoting complex // inferred from direct assay /// 0005680 // anaphase-promoting complex // traceable author statement /// 0005829 // cytosol // not recorded	0004842 // ubiquitin-protein ligase activity // traceable author statement /// 0005488 // binding // inferred from electronic annotation	---
3474935	ANAPC5	NM_016237 // ANAPC5 // anaphase promoting complex subunit 5 // 12q24.31 // 51433	GGTCTGTCC	4.99562	chr12:121746160-121790203 (-) // 98.0 // q24.31	1.74266	0.801291	1.74266	AA up vs CA	0000086 // G2/M transition of mitotic cell cycle // traceable author statement /// 0000090 // mitotic anaphase // traceable author statement /// 0006511 // ubiquitin-dependent protein catabolic process // traceable author statement /// 0007049 // cell cycle // inferred from electronic annotation /// 0007067 // mitosis // inferred from electronic annotation /// 0031145 // anaphase-promoting comple…	0005654 // nucleoplasm // not recorded /// 0005680 // anaphase-promoting complex // inferred from direct assay /// 0005680 // anaphase-promoting complex // traceable author statement /// 0005829 // cytosol // not recorded	0004842 // ubiquitin-protein ligase activity // traceable author statement /// 0005488 // binding // inferred from electronic annotation	---
2487963	ANKRD53	NM_024933 // ANKRD53 // ankyrin repeat domain 53 // 2p13.3 // 79998 /// NM_00111	GCCCTGTCC	4.94793	chr2:71205761-71207448 (+) // 80.78 // p13.3	0.580532	-0.784553	-1.72256	AA down vs CA	---	---	---	---
2784027	ANXA5	NM_001154 // ANXA5 // annexin A5 // 4q26-q28|4q27 // 308 /// ENST00000296511 //	AAACTGTCC	2.73353	chr4:122589147-122618176 (-) // 99.02 // q27	1.87348	0.905721	1.87348	AA up vs CA	0006916 // anti-apoptosis // traceable author statement /// 0007165 // signal transduction // traceable author statement /// 0007596 // blood coagulation // inferred from electronic annotation /// 0010033 // response to organic substance // inferred from electronic annotation /// 0050819 // negative regulation of coagulation // inferred from electronic annotation /// 0051260 // protein homooligom…	0005622 // intracellular // inferred from direct assay /// 0005737 // cytoplasm // traceable author statement	0004859 // phospholipase inhibitor activity // traceable author statement /// 0005509 // calcium ion binding // inferred from electronic annotation /// 0005515 // protein binding // inferred from physical interaction /// 0005515 // protein binding // inferred from electronic annotation /// 0005543 // phospholipid binding // traceable author statement /// 0005544 // calcium-dependent phospholipid …	Prostaglandin_synthesis_regulation // GenMAPP
2784027	ANXA5	NM_001154 // ANXA5 // annexin A5 // 4q26-q28|4q27 // 308 /// ENST00000296511 //	GGACAGTCC	0.75454	chr4:122589147-122618176 (-) // 99.02 // q27	1.87348	0.905721	1.87348	AA up vs CA	0006916 // anti-apoptosis // traceable author statement /// 0007165 // signal transduction // traceable author statement /// 0007596 // blood coagulation // inferred from electronic annotation /// 0010033 // response to organic substance // inferred from electronic annotation /// 0050819 // negative regulation of coagulation // inferred from electronic annotation /// 0051260 // protein homooligom…	0005622 // intracellular // inferred from direct assay /// 0005737 // cytoplasm // traceable author statement	0004859 // phospholipase inhibitor activity // traceable author statement /// 0005509 // calcium ion binding // inferred from electronic annotation /// 0005515 // protein binding // inferred from physical interaction /// 0005515 // protein binding // inferred from electronic annotation /// 0005543 // phospholipid binding // traceable author statement /// 0005544 // calcium-dependent phospholipid …	Prostaglandin_synthesis_regulation // GenMAPP
2784027	ANXA5	NM_001154 // ANXA5 // annexin A5 // 4q26-q28|4q27 // 308 /// ENST00000296511 //	GCGCTGTCC	4.24108	chr4:122589147-122618176 (-) // 99.02 // q27	1.87348	0.905721	1.87348	AA up vs CA	0006916 // anti-apoptosis // traceable author statement /// 0007165 // signal transduction // traceable author statement /// 0007596 // blood coagulation // inferred from electronic annotation /// 0010033 // response to organic substance // inferred from electronic annotation /// 0050819 // negative regulation of coagulation // inferred from electronic annotation /// 0051260 // protein homooligom…	0005622 // intracellular // inferred from direct assay /// 0005737 // cytoplasm // traceable author statement	0004859 // phospholipase inhibitor activity // traceable author statement /// 0005509 // calcium ion binding // inferred from electronic annotation /// 0005515 // protein binding // inferred from physical interaction /// 0005515 // protein binding // inferred from electronic annotation /// 0005543 // phospholipid binding // traceable author statement /// 0005544 // calcium-dependent phospholipid …	Prostaglandin_synthesis_regulation // GenMAPP
3718682	AP2B1	NM_001030006 // AP2B1 // adaptor-related protein complex 2, beta 1 subunit // 17	TTAGTGTCC	2.51915	chr17:33914292-34053428 (+) // 96.35 // q12	1.86686	0.900614	1.86686	AA up vs CA	0006810 // transport // inferred from electronic annotation /// 0006886 // intracellular protein transport // inferred from electronic annotation /// 0007268 // synaptic transmission // inferred from electronic annotation /// 0007269 // neurotransmitter secretion // inferred from electronic annotation /// 0015031 // protein transport // inferred from electronic annotation /// 0016192 // vesicle-m…	0005802 // trans-Golgi network // inferred from electronic annotation /// 0005829 // cytosol // not recorded /// 0005886 // plasma membrane // not recorded /// 0005886 // plasma membrane // inferred from electronic annotation /// 0005905 // coated pit // inferred from electronic annotation /// 0016020 // membrane // inferred from electronic annotation /// 0030117 // membrane coat // inferred from…	0005488 // binding // inferred from electronic annotation /// 0005515 // protein binding // inferred from physical interaction /// 0005515 // protein binding // inferred from electronic annotation /// 0008565 // protein transporter activity // inferred from electronic annotation /// 0030276 // clathrin binding // inferred from physical interaction /// 0030276 // clathrin binding // inferred from …	---
3718682	AP2B1	NM_001030006 // AP2B1 // adaptor-related protein complex 2, beta 1 subunit // 17	CCATTGTCC	2.8087	chr17:33914292-34053428 (+) // 96.35 // q12	1.86686	0.900614	1.86686	AA up vs CA	0006810 // transport // inferred from electronic annotation /// 0006886 // intracellular protein transport // inferred from electronic annotation /// 0007268 // synaptic transmission // inferred from electronic annotation /// 0007269 // neurotransmitter secretion // inferred from electronic annotation /// 0015031 // protein transport // inferred from electronic annotation /// 0016192 // vesicle-m…	0005802 // trans-Golgi network // inferred from electronic annotation /// 0005829 // cytosol // not recorded /// 0005886 // plasma membrane // not recorded /// 0005886 // plasma membrane // inferred from electronic annotation /// 0005905 // coated pit // inferred from electronic annotation /// 0016020 // membrane // inferred from electronic annotation /// 0030117 // membrane coat // inferred from…	0005488 // binding // inferred from electronic annotation /// 0005515 // protein binding // inferred from physical interaction /// 0005515 // protein binding // inferred from electronic annotation /// 0008565 // protein transporter activity // inferred from electronic annotation /// 0030276 // clathrin binding // inferred from physical interaction /// 0030276 // clathrin binding // inferred from …	---
3718682	AP2B1	NM_001030006 // AP2B1 // adaptor-related protein complex 2, beta 1 subunit // 17	TTAGTGTCC	2.51915	chr17:33914292-34053428 (+) // 95.35 // q12	1.86686	0.900614	1.86686	AA up vs CA	0006810 // transport // inferred from electronic annotation /// 0006886 // intracellular protein transport // inferred from electronic annotation /// 0007268 // synaptic transmission // inferred from electronic annotation /// 0007269 // neurotransmitter secretion // inferred from electronic annotation /// 0015031 // protein transport // inferred from electronic annotation /// 0016192 // vesicle-m…	0005802 // trans-Golgi network // inferred from electronic annotation /// 0005829 // cytosol // not recorded /// 0005886 // plasma membrane // not recorded /// 0005886 // plasma membrane // inferred from electronic annotation /// 0005905 // coated pit // inferred from electronic annotation /// 0016020 // membrane // inferred from electronic annotation /// 0030117 // membrane coat // inferred from…	0005488 // binding // inferred from electronic annotation /// 0005515 // protein binding // inferred from physical interaction /// 0005515 // protein binding // inferred from electronic annotation /// 0008565 // protein transporter activity // inferred from electronic annotation /// 0030276 // clathrin binding // inferred from physical interaction /// 0030276 // clathrin binding // inferred from …	---
3718682	AP2B1	NM_001030006 // AP2B1 // adaptor-related protein complex 2, beta 1 subunit // 17	CCATTGTCC	2.8087	chr17:33914292-34053428 (+) // 95.35 // q12	1.86686	0.900614	1.86686	AA up vs CA	0006810 // transport // inferred from electronic annotation /// 0006886 // intracellular protein transport // inferred from electronic annotation /// 0007268 // synaptic transmission // inferred from electronic annotation /// 0007269 // neurotransmitter secretion // inferred from electronic annotation /// 0015031 // protein transport // inferred from electronic annotation /// 0016192 // vesicle-m…	0005802 // trans-Golgi network // inferred from electronic annotation /// 0005829 // cytosol // not recorded /// 0005886 // plasma membrane // not recorded /// 0005886 // plasma membrane // inferred from electronic annotation /// 0005905 // coated pit // inferred from electronic annotation /// 0016020 // membrane // inferred from electronic annotation /// 0030117 // membrane coat // inferred from…	0005488 // binding // inferred from electronic annotation /// 0005515 // protein binding // inferred from physical interaction /// 0005515 // protein binding // inferred from electronic annotation /// 0008565 // protein transporter activity // inferred from electronic annotation /// 0030276 // clathrin binding // inferred from physical interaction /// 0030276 // clathrin binding // inferred from …	---
2505833	ARHGEF4	NM_032995 // ARHGEF4 // Rho guanine nucleotide exchange factor (GEF) 4 // 2q22 /	GGACAGAGC	4.24108	chr2:131674223-131804836 (+) // 99.84 // q21.1	0.571814	-0.806382	-1.74882	AA down vs CA	0006915 // apoptosis // not recorded /// 0008624 // induction of apoptosis by extracellular signals // not recorded /// 0023034 // intracellular signaling pathway // non-traceable author statement /// 0035023 // regulation of Rho protein signal transduction // inferred from electronic annotation	0005622 // intracellular // inferred from electronic annotation /// 0005737 // cytoplasm // inferred from electronic annotation /// 0005829 // cytosol // not recorded /// 0005886 // plasma membrane // inferred from electronic annotation /// 0016020 // membrane // inferred from electronic annotation /// 0032587 // ruffle membrane // inferred from electronic annotation /// 0042995 // cell projectio…	0005085 // guanyl-nucleotide exchange factor activity // not recorded /// 0005085 // guanyl-nucleotide exchange factor activity // inferred from electronic annotation /// 0005089 // Rho guanyl-nucleotide exchange factor activity // non-traceable author statement /// 0005089 // Rho guanyl-nucleotide exchange factor activity // inferred from electronic annotation /// 0005515 // protein binding // i…	---
2505833	ARHGEF4	NM_032995 // ARHGEF4 // Rho guanine nucleotide exchange factor (GEF) 4 // 2q22 /	GGACAGAGC	4.24108	chr2:131785515-131803762 (+) // 88.03 // q21.1	0.571814	-0.806382	-1.74882	AA down vs CA	0006915 // apoptosis // not recorded /// 0008624 // induction of apoptosis by extracellular signals // not recorded /// 0023034 // intracellular signaling pathway // non-traceable author statement /// 0035023 // regulation of Rho protein signal transduction // inferred from electronic annotation	0005622 // intracellular // inferred from electronic annotation /// 0005737 // cytoplasm // inferred from electronic annotation /// 0005829 // cytosol // not recorded /// 0005886 // plasma membrane // inferred from electronic annotation /// 0016020 // membrane // inferred from electronic annotation /// 0032587 // ruffle membrane // inferred from electronic annotation /// 0042995 // cell projectio…	0005085 // guanyl-nucleotide exchange factor activity // not recorded /// 0005085 // guanyl-nucleotide exchange factor activity // inferred from electronic annotation /// 0005089 // Rho guanyl-nucleotide exchange factor activity // non-traceable author statement /// 0005089 // Rho guanyl-nucleotide exchange factor activity // inferred from electronic annotation /// 0005515 // protein binding // i…	---
2505833	ARHGEF4	NM_032995 // ARHGEF4 // Rho guanine nucleotide exchange factor (GEF) 4 // 2q22 /	GGACAGAGC	4.24108	chr2:131675003-131804824 (-) // 99.97 // q21.1	0.571814	-0.806382	-1.74882	AA down vs CA	0006915 // apoptosis // not recorded /// 0008624 // induction of apoptosis by extracellular signals // not recorded /// 0023034 // intracellular signaling pathway // non-traceable author statement /// 0035023 // regulation of Rho protein signal transduction // inferred from electronic annotation	0005622 // intracellular // inferred from electronic annotation /// 0005737 // cytoplasm // inferred from electronic annotation /// 0005829 // cytosol // not recorded /// 0005886 // plasma membrane // inferred from electronic annotation /// 0016020 // membrane // inferred from electronic annotation /// 0032587 // ruffle membrane // inferred from electronic annotation /// 0042995 // cell projectio…	0005085 // guanyl-nucleotide exchange factor activity // not recorded /// 0005085 // guanyl-nucleotide exchange factor activity // inferred from electronic annotation /// 0005089 // Rho guanyl-nucleotide exchange factor activity // non-traceable author statement /// 0005089 // Rho guanyl-nucleotide exchange factor activity // inferred from electronic annotation /// 0005515 // protein binding // i…	---
3359224	ASCL2	NM_005170 // ASCL2 // achaete-scute complex homolog 2 (Drosophila) // 11p15.5 //	GGACAGTGA	0.86373	chr11:2290966-2291898 (-) // 95.92 // p15.5	0.508806	-0.974812	-1.96539	AA down vs CA	0001666 // response to hypoxia // inferred from expression pattern /// 0001701 // in utero embryonic development // inferred from electronic annotation /// 0001890 // placenta development // non-traceable author statement /// 0006355 // regulation of transcription, DNA-dependent // non-traceable author statement /// 0006357 // regulation of transcription from RNA polymerase II promoter // inferre…	0005634 // nucleus // inferred from direct assay /// 0005634 // nucleus // non-traceable author statement /// 0005634 // nucleus // inferred from electronic annotation /// 0005737 // cytoplasm // inferred from direct assay	0003677 // DNA binding // inferred from electronic annotation /// 0003700 // sequence-specific DNA binding transcription factor activity // non-traceable author statement /// 0003700 // sequence-specific DNA binding transcription factor activity // inferred from electronic annotation /// 0030528 // transcription regulator activity // inferred from direct assay /// 0030528 // transcription regulat…	---
3359224	ASCL2	NM_005170 // ASCL2 // achaete-scute complex homolog 2 (Drosophila) // 11p15.5 //	GGACAGCGC	4.24108	chr11:2290966-2291898 (-) // 95.92 // p15.5	0.508806	-0.974812	-1.96539	AA down vs CA	0001666 // response to hypoxia // inferred from expression pattern /// 0001701 // in utero embryonic development // inferred from electronic annotation /// 0001890 // placenta development // non-traceable author statement /// 0006355 // regulation of transcription, DNA-dependent // non-traceable author statement /// 0006357 // regulation of transcription from RNA polymerase II promoter // inferre…	0005634 // nucleus // inferred from direct assay /// 0005634 // nucleus // non-traceable author statement /// 0005634 // nucleus // inferred from electronic annotation /// 0005737 // cytoplasm // inferred from direct assay	0003677 // DNA binding // inferred from electronic annotation /// 0003700 // sequence-specific DNA binding transcription factor activity // non-traceable author statement /// 0003700 // sequence-specific DNA binding transcription factor activity // inferred from electronic annotation /// 0030528 // transcription regulator activity // inferred from direct assay /// 0030528 // transcription regulat…	---
3062576	ASNS	NM_133436 // ASNS // asparagine synthetase (glutamine-hydrolyzing) // 7q21.3 //	GGACATTTT	3.59934	chr7:97481442-97501783 (-) // 99.75 // q21.3	1.89788	0.924389	1.89788	AA up vs CA	0001889 // liver development // inferred from electronic annotation /// 0006520 // cellular amino acid metabolic process // inferred from electronic annotation /// 0006529 // asparagine biosynthetic process // inferred by curator /// 0006529 // asparagine biosynthetic process // inferred from direct assay /// 0006529 // asparagine biosynthetic process // inferred from electronic annotation /// 00…	0005625 // soluble fraction // inferred from direct assay /// 0005625 // soluble fraction // inferred from electronic annotation /// 0005829 // cytosol // not recorded	0000166 // nucleotide binding // inferred from electronic annotation /// 0004066 // asparagine synthase (glutamine-hydrolyzing) activity // not recorded /// 0004066 // asparagine synthase (glutamine-hydrolyzing) activity // inferred from direct assay /// 0004066 // asparagine synthase (glutamine-hydrolyzing) activity // inferred from electronic annotation /// 0005524 // ATP binding // inferred fr…	---
2513925	B3GALT1	NM_020981 // B3GALT1 // UDP-Gal:betaGlcNAc beta 1,3-galactosyltransferase, polyp	GTATTGTCC	1.65542	chr2:168725515-168726552 (+) // 100.0 // q24.3	0.506853	-0.980361	-1.97296	AA down vs CA	0006486 // protein glycosylation // inferred from direct assay /// 0006486 // protein glycosylation // inferred from electronic annotation /// 0009312 // oligosaccharide biosynthetic process // inferred from electronic annotation /// 0030259 // lipid glycosylation // non-traceable author statement	0000139 // Golgi membrane // inferred from electronic annotation /// 0005794 // Golgi apparatus // inferred from electronic annotation /// 0016020 // membrane // inferred from electronic annotation /// 0016021 // integral to membrane // non-traceable author statement /// 0016021 // integral to membrane // inferred from electronic annotation	0008378 // galactosyltransferase activity // inferred from electronic annotation /// 0008499 // UDP-galactose:beta-N-acetylglucosamine beta-1,3-galactosyltransferase activity // inferred from direct assay /// 0008499 // UDP-galactose:beta-N-acetylglucosamine beta-1,3-galactosyltransferase activity // inferred from electronic annotation /// 0016740 // transferase activity // inferred from electron…	---
3921933	BACE2	NM_012105 // BACE2 // beta-site APP-cleaving enzyme 2 // 21q22.3 // 25825 /// NM	TAATTGTCC	2.51915	chr21:42540125-42647783 (+) // 96.98 // q22.2	1.90224	0.927699	1.90224	AA up vs CA	0006508 // proteolysis // non-traceable author statement /// 0006508 // proteolysis // inferred from electronic annotation /// 0006509 // membrane protein ectodomain proteolysis // inferred from direct assay /// 0006509 // membrane protein ectodomain proteolysis // inferred from electronic annotation /// 0016486 // peptide hormone processing // non-traceable author statement /// 0042985 // negati…	0005768 // endosome // inferred from electronic annotation /// 0005783 // endoplasmic reticulum // inferred from electronic annotation /// 0005794 // Golgi apparatus // inferred from direct assay /// 0005794 // Golgi apparatus // inferred from electronic annotation /// 0009986 // cell surface // inferred from electronic annotation /// 0016020 // membrane // inferred from electronic annotation ///…	0004190 // aspartic-type endopeptidase activity // inferred from direct assay /// 0004190 // aspartic-type endopeptidase activity // inferred from electronic annotation /// 0008233 // peptidase activity // inferred from electronic annotation /// 0016787 // hydrolase activity // inferred from electronic annotation	---
2500275	BCL2L11	NM_138621 // BCL2L11 // BCL2-like 11 (apoptosis facilitator) // 2q13 // 10018 //	GGACACCGC	4.89044	chr2:111881322-111921808 (+) // 99.76 // q13	0.580567	-0.784466	-1.72245	AA down vs CA	0001701 // in utero embryonic development // inferred from electronic annotation /// 0001776 // leukocyte homeostasis // inferred from electronic annotation /// 0001782 // B cell homeostasis // inferred from electronic annotation /// 0001783 // B cell apoptosis // inferred from electronic annotation /// 0001822 // kidney development // inferred from electronic annotation /// 0002260 // lymphocyte…	0000300 // peripheral to membrane of membrane fraction // inferred from electronic annotation /// 0005624 // membrane fraction // traceable author statement /// 0005737 // cytoplasm // inferred from electronic annotation /// 0005739 // mitochondrion // inferred from electronic annotation /// 0005829 // cytosol // not recorded /// 0005886 // plasma membrane // not recorded /// 0012505 // endomembr…	0005515 // protein binding // inferred from physical interaction /// 0005515 // protein binding // inferred from electronic annotation /// 0008017 // microtubule binding // inferred from electronic annotation	Apoptosis // GenMAPP
2500275	BCL2L11	NM_138621 // BCL2L11 // BCL2-like 11 (apoptosis facilitator) // 2q13 // 10018 //	GGACACCGC	4.89044	chr2:111921737-111922208 (+) // 98.32 // q13	0.580567	-0.784466	-1.72245	AA down vs CA	0001701 // in utero embryonic development // inferred from electronic annotation /// 0001776 // leukocyte homeostasis // inferred from electronic annotation /// 0001782 // B cell homeostasis // inferred from electronic annotation /// 0001783 // B cell apoptosis // inferred from electronic annotation /// 0001822 // kidney development // inferred from electronic annotation /// 0002260 // lymphocyte…	0000300 // peripheral to membrane of membrane fraction // inferred from electronic annotation /// 0005624 // membrane fraction // traceable author statement /// 0005737 // cytoplasm // inferred from electronic annotation /// 0005739 // mitochondrion // inferred from electronic annotation /// 0005829 // cytosol // not recorded /// 0005886 // plasma membrane // not recorded /// 0012505 // endomembr…	0005515 // protein binding // inferred from physical interaction /// 0005515 // protein binding // inferred from electronic annotation /// 0008017 // microtubule binding // inferred from electronic annotation	Apoptosis // GenMAPP
3326067	C11orf41	NM_012194 // C11orf41 // chromosome 11 open reading frame 41 // 11p13 // 25758 /	GGACAGTCC	0.75454	chr11:33564473-33691683 (+) // 99.3 // p13	0.572964	-0.803484	-1.74531	AA down vs CA	---	0005634 // nucleus // inferred from direct assay /// 0005737 // cytoplasm // inferred from direct assay /// 0016020 // membrane // inferred from electronic annotation /// 0016021 // integral to membrane // inferred from electronic annotation /// 0043231 // intracellular membrane-bounded organelle // inferred from direct assay	---	---
2322362	C1orf144	NM_001114600 // C1orf144 // chromosome 1 open reading frame 144 // 1p36.13 // 26	GGACAGGGC	4.94793	chr1:16693725-16724640 (+) // 96.94 // p36.13	1.81144	0.857137	1.81144	AA up vs CA	---	---	---	---
2322362	C1orf144	NM_001114600 // C1orf144 // chromosome 1 open reading frame 144 // 1p36.13 // 26	GGACAGGGC	4.94793	chr1:16693725-16724640 (+) // 96.94 // p36.13	1.81144	0.857137	1.81144	AA up vs CA	---	---	---	---
2322362	C1orf144	NM_001114600 // C1orf144 // chromosome 1 open reading frame 144 // 1p36.13 // 26	GGACAGGGC	4.94793	chr1:16693725-16724640 (+) // 96.94 // p36.13	1.81144	0.857137	1.81144	AA up vs CA	---	---	---	---
2322362	C1orf144	NM_001114600 // C1orf144 // chromosome 1 open reading frame 144 // 1p36.13 // 26	GGACAGGGC	4.94793	chr1:16693725-16724640 (+) // 96.94 // p36.13	1.81144	0.857137	1.81144	AA up vs CA	---	---	---	---
2406412	C1orf216	BC026909 // C1orf216 // chromosome 1 open reading frame 216 // 1p34.3 // 127703	GCCCTGTCC	4.94793	chr1:36179477-36185073 (-) // 86.78 // p34.3	0.559322	-0.838249	-1.78788	AA down vs CA	---	---	---	---
2383176	C1orf95	NM_001003665 // C1orf95 // chromosome 1 open reading frame 95 // 1q42.12 // 3750	GAAGTGTCC	1.65542	chr1:226793429-226796915 (+) // 99.49 // q42.12	0.538198	-0.893791	-1.85805	AA down vs CA	---	0016020 // membrane // inferred from electronic annotation /// 0016021 // integral to membrane // inferred from electronic annotation	---	---
2383176	C1orf95	NM_001003665 // C1orf95 // chromosome 1 open reading frame 95 // 1q42.12 // 3750	GCTGTGTCC	4.89044	chr1:226793429-226796915 (+) // 99.49 // q42.12	0.538198	-0.893791	-1.85805	AA down vs CA	---	0016020 // membrane // inferred from electronic annotation /// 0016021 // integral to membrane // inferred from electronic annotation	---	---
2723605	C4orf19	NM_001104629 // C4orf19 // chromosome 4 open reading frame 19 // 4p14 // 55286 /	AGAATGTCC	3.34783	chr4:37585854-37593434 (+) // 94.21 // p14	0.55362	-0.853032	-1.80629	AA down vs CA	---	---	---	---
2723605	C4orf19	NM_001104629 // C4orf19 // chromosome 4 open reading frame 19 // 4p14 // 55286 /	GGACACTAT	3.38289	chr4:37585854-37593434 (+) // 94.21 // p14	0.55362	-0.853032	-1.80629	AA down vs CA	---	---	---	---
3095313	C8orf4	NM_020130 // C8orf4 // chromosome 8 open reading frame 4 // 8p11.2 // 56892 ///	GGACACTGG	2.8087	chr8:40011002-40012332 (+) // 97.85 // p11.21	1.95587	0.96781	1.95587	AA up vs CA	0006915 // apoptosis // inferred from electronic annotation	---	---	---
2358092	CA14	NM_012113 // CA14 // carbonic anhydrase XIV // 1q21 // 23632 /// ENST00000369111	TCAGTGTCC	1.5131	chr1:150230217-150237476 (+) // 93.85 // q21.2	0.520666	-0.94157	-1.92062	AA down vs CA	---	0016020 // membrane // inferred from electronic annotation /// 0016021 // integral to membrane // inferred from electronic annotation /// 0016021 // integral to membrane // traceable author statement	0004089 // carbonate dehydratase activity // inferred from electronic annotation /// 0004089 // carbonate dehydratase activity // traceable author statement /// 0016829 // lyase activity // inferred from electronic annotation /// 0046872 // metal ion binding // inferred from electronic annotation	---
2358092	CA14	NM_012113 // CA14 // carbonic anhydrase XIV // 1q21 // 23632 /// ENST00000369111	ACAGTGTCC	2.37683	chr1:150230217-150237476 (+) // 93.85 // q21.2	0.520666	-0.94157	-1.92062	AA down vs CA	---	0016020 // membrane // inferred from electronic annotation /// 0016021 // integral to membrane // inferred from electronic annotation /// 0016021 // integral to membrane // traceable author statement	0004089 // carbonate dehydratase activity // inferred from electronic annotation /// 0004089 // carbonate dehydratase activity // traceable author statement /// 0016829 // lyase activity // inferred from electronic annotation /// 0046872 // metal ion binding // inferred from electronic annotation	---
2821194	CAST	NM_001042440 // CAST // calpastatin // 5q15 // 831 /// NM_001190442 // CAST // c	GGACAATTG	3.81475	chr5:96079272-96109115 (+) // 95.04 // q15	1.92338	0.943644	1.92338	AA up vs CA	0007520 // myoblast fusion // inferred from electronic annotation /// 0043086 // negative regulation of catalytic activity // inferred from electronic annotation	---	0004866 // endopeptidase inhibitor activity // traceable author statement /// 0004869 // cysteine-type endopeptidase inhibitor activity // inferred from electronic annotation /// 0005515 // protein binding // inferred from physical interaction /// 0010859 // calcium-dependent cysteine-type endopeptidase inhibitor activity // inferred from electronic annotation /// 0010859 // calcium-dependent cys…	---
2821194	CAST	NM_001042440 // CAST // calpastatin // 5q15 // 831 /// NM_001190442 // CAST // c	GGACAATTG	3.81475	chr5:96064012-96108523 (+) // 99.21 // q15	1.92338	0.943644	1.92338	AA up vs CA	0007520 // myoblast fusion // inferred from electronic annotation /// 0043086 // negative regulation of catalytic activity // inferred from electronic annotation	---	0004866 // endopeptidase inhibitor activity // traceable author statement /// 0004869 // cysteine-type endopeptidase inhibitor activity // inferred from electronic annotation /// 0005515 // protein binding // inferred from physical interaction /// 0010859 // calcium-dependent cysteine-type endopeptidase inhibitor activity // inferred from electronic annotation /// 0010859 // calcium-dependent cys…	---
2821194	CAST	NM_001042440 // CAST // calpastatin // 5q15 // 831 /// NM_001190442 // CAST // c	GGACAATTG	3.81475	chr5:96108879-96116208 (+) // 83.11 // q15	1.92338	0.943644	1.92338	AA up vs CA	0007520 // myoblast fusion // inferred from electronic annotation /// 0043086 // negative regulation of catalytic activity // inferred from electronic annotation	---	0004866 // endopeptidase inhibitor activity // traceable author statement /// 0004869 // cysteine-type endopeptidase inhibitor activity // inferred from electronic annotation /// 0005515 // protein binding // inferred from physical interaction /// 0010859 // calcium-dependent cysteine-type endopeptidase inhibitor activity // inferred from electronic annotation /// 0010859 // calcium-dependent cys…	---
3774701	CCDC57	NM_198082 // CCDC57 // coiled-coil domain containing 57 // 17q25.3 // 284001 ///	GCTCTGTCC	4.24108	chr17:80111482-80113627 (-) // 81.87 // q25.3	0.49449	-1.01599	-2.02228	AA down vs CA	---	---	---	---
3003193	CCT6A	NM_001762 // CCT6A // chaperonin containing TCP1, subunit 6A (zeta 1) // 7p11.2	GGACACTGG	2.8087	chr7:56119455-56131682 (+) // 89.33 // p11.2	1.84702	0.885199	1.84702	AA up vs CA	0006457 // protein folding // inferred from electronic annotation /// 0006457 // protein folding // traceable author statement /// 0044267 // cellular protein metabolic process // inferred from electronic annotation	0005737 // cytoplasm // inferred from electronic annotation /// 0005737 // cytoplasm // traceable author statement /// 0005829 // cytosol // not recorded /// 0005832 // chaperonin-containing T-complex // inferred from electronic annotation	0000166 // nucleotide binding // inferred from electronic annotation /// 0005515 // protein binding // inferred from electronic annotation /// 0005524 // ATP binding // inferred from electronic annotation /// 0051082 // unfolded protein binding // inferred from electronic annotation /// 0051082 // unfolded protein binding // traceable author statement	---
3003193	CCT6A	NM_001762 // CCT6A // chaperonin containing TCP1, subunit 6A (zeta 1) // 7p11.2	GGACACTGG	2.8087	chr7:56119455-56131095 (+) // 97.76 // p11.2	1.84702	0.885199	1.84702	AA up vs CA	0006457 // protein folding // inferred from electronic annotation /// 0006457 // protein folding // traceable author statement /// 0044267 // cellular protein metabolic process // inferred from electronic annotation	0005737 // cytoplasm // inferred from electronic annotation /// 0005737 // cytoplasm // traceable author statement /// 0005829 // cytosol // not recorded /// 0005832 // chaperonin-containing T-complex // inferred from electronic annotation	0000166 // nucleotide binding // inferred from electronic annotation /// 0005515 // protein binding // inferred from electronic annotation /// 0005524 // ATP binding // inferred from electronic annotation /// 0051082 // unfolded protein binding // inferred from electronic annotation /// 0051082 // unfolded protein binding // traceable author statement	---
2881370	CD74	NM_001025159 // CD74 // CD74 molecule, major histocompatibility complex, class I	GGACATTTG	4.03121	chr5:149781299-149792313 (-) // 93.47 // q32	1.86916	0.90239	1.86916	AA up vs CA	0000187 // activation of MAPK activity // inferred from electronic annotation /// 0001516 // prostaglandin biosynthetic process // inferred from direct assay /// 0001961 // positive regulation of cytokine-mediated signaling pathway // inferred from mutant phenotype /// 0001961 // positive regulation of cytokine-mediated signaling pathway // inferred from electronic annotation /// 0002792 // negat…	0005622 // intracellular // traceable author statement /// 0005764 // lysosome // inferred from electronic annotation /// 0005768 // endosome // inferred from electronic annotation /// 0005770 // late endosome // inferred from electronic annotation /// 0005771 // multivesicular body // inferred from electronic annotation /// 0005773 // vacuole // inferred from direct assay /// 0005783 // endoplas…	0001540 // beta-amyloid binding // inferred from physical interaction /// 0004896 // cytokine receptor activity // inferred from direct assay /// 0004896 // cytokine receptor activity // inferred from electronic annotation /// 0005515 // protein binding // inferred from electronic annotation /// 0019955 // cytokine binding // inferred from physical interaction /// 0042289 // MHC class II protein …	---
3358393	CEND1	NM_016564 // CEND1 // cell cycle exit and neuronal differentiation 1 // 11p15.5	GCTGTGTCC	4.89044	chr11:787116-788658 (-) // 97.45 // p15.5	0.571525	-0.807111	-1.7497	AA down vs CA	---	0016020 // membrane // inferred from electronic annotation /// 0016021 // integral to membrane // inferred from electronic annotation	---	---
3737647	CHMP6	NM_024591 // CHMP6 // chromatin modifying protein 6 // 17q25.3 // 79643 /// ENST	GGACAGTGA	0.86373	chr17:78965702-78973931 (+) // 99.88 // q25.3	2.15305	1.10638	2.15305	AA up vs CA	0006810 // transport // inferred from electronic annotation /// 0015031 // protein transport // inferred from electronic annotation	0005768 // endosome // inferred from electronic annotation /// 0010008 // endosome membrane // inferred from electronic annotation /// 0012505 // endomembrane system // inferred from electronic annotation /// 0016020 // membrane // inferred from electronic annotation /// 0031902 // late endosome membrane // inferred from electronic annotation	0005515 // protein binding // inferred from physical interaction /// 0047485 // protein N-terminus binding // inferred from physical interaction	---
3247712	CISD1	NM_018464 // CISD1 // CDGSH iron sulfur domain 1 // 10q21.1 // 55847 /// ENST000	TAAGTGTCC	2.51915	chr10:60028924-60047592 (+) // 97.17 // q21.1	1.86207	0.896907	1.86207	AA up vs CA	0043457 // regulation of cellular respiration // inferred from electronic annotation	0005739 // mitochondrion // inferred from sequence or structural similarity /// 0005739 // mitochondrion // inferred from electronic annotation /// 0005741 // mitochondrial outer membrane // inferred from electronic annotation /// 0016020 // membrane // inferred from electronic annotation /// 0016021 // integral to membrane // inferred from electronic annotation /// 0043231 // intracellular membr…	0046872 // metal ion binding // inferred from electronic annotation /// 0051536 // iron-sulfur cluster binding // inferred from electronic annotation /// 0051537 // 2 iron, 2 sulfur cluster binding // inferred from electronic annotation	---
3029066	CLCN1	NM_000083 // CLCN1 // chloride channel 1, skeletal muscle // 7q32-qter|7q35 // 1	GGACAATGC	0.64936	chr7:143013218-143049097 (+) // 99.9 // q34	0.579514	-0.787085	-1.72558	AA down vs CA	0006810 // transport // traceable author statement /// 0006810 // transport // inferred from electronic annotation /// 0006811 // ion transport // inferred from electronic annotation /// 0006821 // chloride transport // inferred from electronic annotation /// 0006936 // muscle contraction // traceable author statement /// 0019227 // neuronal action potential propagation // inferred from electroni…	0005887 // integral to plasma membrane // traceable author statement /// 0016020 // membrane // inferred from electronic annotation /// 0016021 // integral to membrane // inferred from electronic annotation /// 0034707 // chloride channel complex // inferred from electronic annotation /// 0042383 // sarcolemma // inferred from electronic annotation	0005216 // ion channel activity // inferred from electronic annotation /// 0005244 // voltage-gated ion channel activity // inferred from electronic annotation /// 0005247 // voltage-gated chloride channel activity // inferred from electronic annotation /// 0005247 // voltage-gated chloride channel activity // traceable author statement /// 0005254 // chloride channel activity // traceable author…	---
3029066	CLCN1	NM_000083 // CLCN1 // chloride channel 1, skeletal muscle // 7q32-qter|7q35 // 1	GGGCTGTCC	4.99562	chr7:143013218-143049097 (+) // 99.9 // q34	0.579514	-0.787085	-1.72558	AA down vs CA	0006810 // transport // traceable author statement /// 0006810 // transport // inferred from electronic annotation /// 0006811 // ion transport // inferred from electronic annotation /// 0006821 // chloride transport // inferred from electronic annotation /// 0006936 // muscle contraction // traceable author statement /// 0019227 // neuronal action potential propagation // inferred from electroni…	0005887 // integral to plasma membrane // traceable author statement /// 0016020 // membrane // inferred from electronic annotation /// 0016021 // integral to membrane // inferred from electronic annotation /// 0034707 // chloride channel complex // inferred from electronic annotation /// 0042383 // sarcolemma // inferred from electronic annotation	0005216 // ion channel activity // inferred from electronic annotation /// 0005244 // voltage-gated ion channel activity // inferred from electronic annotation /// 0005247 // voltage-gated chloride channel activity // inferred from electronic annotation /// 0005247 // voltage-gated chloride channel activity // traceable author statement /// 0005254 // chloride channel activity // traceable author…	---
2751385	CLCN3	NM_173872 // CLCN3 // chloride channel 3 // 4q33 // 1182 /// NM_001829 // CLCN3	GTAATGTCC	1.87187	chr4:170541798-170644336 (+) // 92.3 // q33	1.77261	0.825875	1.77261	AA up vs CA	0006810 // transport // traceable author statement /// 0006810 // transport // inferred from electronic annotation /// 0006811 // ion transport // inferred from electronic annotation /// 0006821 // chloride transport // inferred from electronic annotation /// 0006885 // regulation of pH // traceable author statement /// 0048388 // endosomal lumen acidification // traceable author statement /// 00…	0000139 // Golgi membrane // inferred from electronic annotation /// 0005768 // endosome // inferred from electronic annotation /// 0005769 // early endosome // inferred from direct assay /// 0005770 // late endosome // inferred from direct assay /// 0005794 // Golgi apparatus // inferred from direct assay /// 0005794 // Golgi apparatus // inferred from electronic annotation /// 0009986 // cell s…	0000166 // nucleotide binding // inferred from electronic annotation /// 0005216 // ion channel activity // inferred from electronic annotation /// 0005247 // voltage-gated chloride channel activity // inferred from electronic annotation /// 0005247 // voltage-gated chloride channel activity // traceable author statement /// 0005254 // chloride channel activity // traceable author statement /// 0…	---
2751385	CLCN3	NM_173872 // CLCN3 // chloride channel 3 // 4q33 // 1182 /// NM_001829 // CLCN3	GTAATGTCC	1.87187	chr4:170541798-170644336 (+) // 92.3 // q33	1.77261	0.825875	1.77261	AA up vs CA	0006810 // transport // traceable author statement /// 0006810 // transport // inferred from electronic annotation /// 0006811 // ion transport // inferred from electronic annotation /// 0006821 // chloride transport // inferred from electronic annotation /// 0006885 // regulation of pH // traceable author statement /// 0048388 // endosomal lumen acidification // traceable author statement /// 00…	0000139 // Golgi membrane // inferred from electronic annotation /// 0005768 // endosome // inferred from electronic annotation /// 0005769 // early endosome // inferred from direct assay /// 0005770 // late endosome // inferred from direct assay /// 0005794 // Golgi apparatus // inferred from direct assay /// 0005794 // Golgi apparatus // inferred from electronic annotation /// 0009986 // cell s…	0000166 // nucleotide binding // inferred from electronic annotation /// 0005216 // ion channel activity // inferred from electronic annotation /// 0005247 // voltage-gated chloride channel activity // inferred from electronic annotation /// 0005247 // voltage-gated chloride channel activity // traceable author statement /// 0005254 // chloride channel activity // traceable author statement /// 0…	---
2751385	CLCN3	NM_173872 // CLCN3 // chloride channel 3 // 4q33 // 1182 /// NM_001829 // CLCN3	GTAATGTCC	1.87187	chr4:170541798-170644336 (+) // 92.3 // q33	1.77261	0.825875	1.77261	AA up vs CA	0006810 // transport // traceable author statement /// 0006810 // transport // inferred from electronic annotation /// 0006811 // ion transport // inferred from electronic annotation /// 0006821 // chloride transport // inferred from electronic annotation /// 0006885 // regulation of pH // traceable author statement /// 0048388 // endosomal lumen acidification // traceable author statement /// 00…	0000139 // Golgi membrane // inferred from electronic annotation /// 0005768 // endosome // inferred from electronic annotation /// 0005769 // early endosome // inferred from direct assay /// 0005770 // late endosome // inferred from direct assay /// 0005794 // Golgi apparatus // inferred from direct assay /// 0005794 // Golgi apparatus // inferred from electronic annotation /// 0009986 // cell s…	0000166 // nucleotide binding // inferred from electronic annotation /// 0005216 // ion channel activity // inferred from electronic annotation /// 0005247 // voltage-gated chloride channel activity // inferred from electronic annotation /// 0005247 // voltage-gated chloride channel activity // traceable author statement /// 0005254 // chloride channel activity // traceable author statement /// 0…	---
2751385	CLCN3	NM_173872 // CLCN3 // chloride channel 3 // 4q33 // 1182 /// NM_001829 // CLCN3	GTAATGTCC	1.87187	chr4:170541798-170642157 (+) // 96.66 // q33	1.77261	0.825875	1.77261	AA up vs CA	0006810 // transport // traceable author statement /// 0006810 // transport // inferred from electronic annotation /// 0006811 // ion transport // inferred from electronic annotation /// 0006821 // chloride transport // inferred from electronic annotation /// 0006885 // regulation of pH // traceable author statement /// 0048388 // endosomal lumen acidification // traceable author statement /// 00…	0000139 // Golgi membrane // inferred from electronic annotation /// 0005768 // endosome // inferred from electronic annotation /// 0005769 // early endosome // inferred from direct assay /// 0005770 // late endosome // inferred from direct assay /// 0005794 // Golgi apparatus // inferred from direct assay /// 0005794 // Golgi apparatus // inferred from electronic annotation /// 0009986 // cell s…	0000166 // nucleotide binding // inferred from electronic annotation /// 0005216 // ion channel activity // inferred from electronic annotation /// 0005247 // voltage-gated chloride channel activity // inferred from electronic annotation /// 0005247 // voltage-gated chloride channel activity // traceable author statement /// 0005254 // chloride channel activity // traceable author statement /// 0…	---
3952566	CLTCL1	NM_007098 // CLTCL1 // clathrin, heavy chain-like 1 // 22q11.2|22q11.21 // 8218	GAAATGTCC	1.87187	chr22:19166988-19279208 (-) // 99.74 // q11.21	0.509204	-0.973684	-1.96385	AA down vs CA	0006886 // intracellular protein transport // inferred from electronic annotation /// 0006898 // receptor-mediated endocytosis // inferred from direct assay /// 0006898 // receptor-mediated endocytosis // traceable author statement /// 0007067 // mitosis // inferred from direct assay /// 0009653 // anatomical structure morphogenesis // traceable author statement /// 0016192 // vesicle-mediated tr…	0005802 // trans-Golgi network // inferred from direct assay /// 0005819 // spindle // inferred from direct assay /// 0005905 // coated pit // inferred from direct assay /// 0005905 // coated pit // inferred from electronic annotation /// 0016020 // membrane // inferred from electronic annotation /// 0030130 // clathrin coat of trans-Golgi network vesicle // inferred from electronic annotation //…	0004871 // signal transducer activity // traceable author statement /// 0005198 // structural molecule activity // inferred from electronic annotation /// 0005488 // binding // inferred from electronic annotation /// 0005515 // protein binding // inferred from physical interaction /// 0005515 // protein binding // inferred from electronic annotation	---
2382467	CNIH3	NM_152495 // CNIH3 // cornichon homolog 3 (Drosophila) // 1q42.12 // 149111 ///	GGTCTGTCC	4.99562	chr1:224716892-224928251 (+) // 98.54 // q42.12	0.568501	-0.814765	-1.75901	AA down vs CA	0023034 // intracellular signaling pathway // inferred from electronic annotation	0016020 // membrane // inferred from electronic annotation /// 0016021 // integral to membrane // inferred from electronic annotation	---	---
2907459	CNPY3	NM_006586 // CNPY3 // canopy 3 homolog (zebrafish) // 6pter-p12.1 // 10695 /// E	GGACAGTTT	2.73353	chr6:42896924-42907000 (+) // 96.74 // p21.1	1.74598	0.804037	1.74598	AA up vs CA	0045087 // innate immune response // inferred from electronic annotation	0005783 // endoplasmic reticulum // inferred from electronic annotation	0005102 // receptor binding // inferred from electronic annotation	---
3369755	COMMD9	NM_014186 // COMMD9 // COMM domain containing 9 // 11p13 // 29099 /// NM_0011016	CAAATGTCC	4.03121	chr11:36295509-36310979 (-) // 97.42 // p13	0.559585	-0.837571	-1.78704	AA down vs CA	---	---	---	---
3353417	CRTAM	NM_019604 // CRTAM // cytotoxic and regulatory T cell molecule // 11q24.1 // 562	GGACATTTT	3.59934	chr11:122709254-122743345 (+) // 86.23 // q24.1	0.554398	-0.851006	-1.80376	AA down vs CA	0001913 // T cell mediated cytotoxicity // inferred from direct assay /// 0002355 // detection of tumor cell // inferred from direct assay /// 0002355 // detection of tumor cell // inferred from electronic annotation /// 0002860 // positive regulation of natural killer cell mediated cytotoxicity directed against tumor cell target // inferred from direct assay /// 0002860 // positive regulation of…	0005886 // plasma membrane // inferred from direct assay /// 0016020 // membrane // inferred from electronic annotation /// 0016021 // integral to membrane // inferred from electronic annotation	0005102 // receptor binding // inferred from physical interaction /// 0005102 // receptor binding // inferred from electronic annotation /// 0005515 // protein binding // inferred from electronic annotation	---
2406783	CSF3R	NM_156039 // CSF3R // colony stimulating factor 3 receptor (granulocyte) // 1p35	GGACAGTCT	2.48201	chr1:36931694-36948500 (-) // 97.89 // p34.3	0.548907	-0.865366	-1.8218	AA down vs CA	0006952 // defense response // traceable author statement /// 0007155 // cell adhesion // inferred from electronic annotation /// 0007165 // signal transduction // non-traceable author statement	0005576 // extracellular region // inferred from electronic annotation /// 0005886 // plasma membrane // inferred from electronic annotation /// 0005887 // integral to plasma membrane // traceable author statement /// 0016020 // membrane // inferred from electronic annotation /// 0016021 // integral to membrane // inferred from electronic annotation	0004872 // receptor activity // inferred from electronic annotation /// 0004872 // receptor activity // traceable author statement /// 0004896 // cytokine receptor activity // inferred from electronic annotation	---
2406783	CSF3R	NM_156039 // CSF3R // colony stimulating factor 3 receptor (granulocyte) // 1p35	GGACAGTCT	2.48201	chr1:36931694-36948500 (-) // 97.89 // p34.3	0.548907	-0.865366	-1.8218	AA down vs CA	0006952 // defense response // traceable author statement /// 0007155 // cell adhesion // inferred from electronic annotation /// 0007165 // signal transduction // non-traceable author statement	0005576 // extracellular region // inferred from electronic annotation /// 0005886 // plasma membrane // inferred from electronic annotation /// 0005887 // integral to plasma membrane // traceable author statement /// 0016020 // membrane // inferred from electronic annotation /// 0016021 // integral to membrane // inferred from electronic annotation	0004872 // receptor activity // inferred from electronic annotation /// 0004872 // receptor activity // traceable author statement /// 0004896 // cytokine receptor activity // inferred from electronic annotation	---
2880932	CSNK1A1	NM_001025105 // CSNK1A1 // casein kinase 1, alpha 1 // 5q32 // 1452 /// NM_00189	GGACAATTC	1.65542	chr5:148876302-148930651 (-) // 99.21 // q32	1.90738	0.931592	1.90738	AA up vs CA	0006468 // protein phosphorylation // inferred from electronic annotation /// 0006468 // protein phosphorylation // traceable author statement /// 0007049 // cell cycle // inferred from electronic annotation /// 0007067 // mitosis // inferred from electronic annotation /// 0007165 // signal transduction // non-traceable author statement /// 0007166 // cell surface receptor linked signaling pathwa…	0000775 // chromosome, centromeric region // inferred from electronic annotation /// 0000776 // kinetochore // inferred from electronic annotation /// 0000777 // condensed chromosome kinetochore // inferred from electronic annotation /// 0005737 // cytoplasm // inferred from electronic annotation /// 0005815 // microtubule organizing center // inferred from electronic annotation /// 0005829 // cy…	0000166 // nucleotide binding // inferred from electronic annotation /// 0004672 // protein kinase activity // traceable author statement /// 0004672 // protein kinase activity // inferred from electronic annotation /// 0004674 // protein serine/threonine kinase activity // inferred from electronic annotation /// 0005515 // protein binding // inferred from physical interaction /// 0005524 // ATP …	---
2880932	CSNK1A1	NM_001025105 // CSNK1A1 // casein kinase 1, alpha 1 // 5q32 // 1452 /// NM_00189	GGACAATTC	1.65542	chr5:148872924-148885164 (-) // 95.44 // q32	1.90738	0.931592	1.90738	AA up vs CA	0006468 // protein phosphorylation // inferred from electronic annotation /// 0006468 // protein phosphorylation // traceable author statement /// 0007049 // cell cycle // inferred from electronic annotation /// 0007067 // mitosis // inferred from electronic annotation /// 0007165 // signal transduction // non-traceable author statement /// 0007166 // cell surface receptor linked signaling pathwa…	0000775 // chromosome, centromeric region // inferred from electronic annotation /// 0000776 // kinetochore // inferred from electronic annotation /// 0000777 // condensed chromosome kinetochore // inferred from electronic annotation /// 0005737 // cytoplasm // inferred from electronic annotation /// 0005815 // microtubule organizing center // inferred from electronic annotation /// 0005829 // cy…	0000166 // nucleotide binding // inferred from electronic annotation /// 0004672 // protein kinase activity // traceable author statement /// 0004672 // protein kinase activity // inferred from electronic annotation /// 0004674 // protein serine/threonine kinase activity // inferred from electronic annotation /// 0005515 // protein binding // inferred from physical interaction /// 0005524 // ATP …	---
2880932	CSNK1A1	NM_001025105 // CSNK1A1 // casein kinase 1, alpha 1 // 5q32 // 1452 /// NM_00189	GGACAATTC	1.65542	chr5:148872924-148885164 (-) // 95.44 // q32	1.90738	0.931592	1.90738	AA up vs CA	0006468 // protein phosphorylation // inferred from electronic annotation /// 0006468 // protein phosphorylation // traceable author statement /// 0007049 // cell cycle // inferred from electronic annotation /// 0007067 // mitosis // inferred from electronic annotation /// 0007165 // signal transduction // non-traceable author statement /// 0007166 // cell surface receptor linked signaling pathwa…	0000775 // chromosome, centromeric region // inferred from electronic annotation /// 0000776 // kinetochore // inferred from electronic annotation /// 0000777 // condensed chromosome kinetochore // inferred from electronic annotation /// 0005737 // cytoplasm // inferred from electronic annotation /// 0005815 // microtubule organizing center // inferred from electronic annotation /// 0005829 // cy…	0000166 // nucleotide binding // inferred from electronic annotation /// 0004672 // protein kinase activity // traceable author statement /// 0004672 // protein kinase activity // inferred from electronic annotation /// 0004674 // protein serine/threonine kinase activity // inferred from electronic annotation /// 0005515 // protein binding // inferred from physical interaction /// 0005524 // ATP …	---
2880932	CSNK1A1	NM_001025105 // CSNK1A1 // casein kinase 1, alpha 1 // 5q32 // 1452 /// NM_00189	GGACAATTC	1.65542	chr5:148874844-148876450 (-) // 97.88 // q32	1.90738	0.931592	1.90738	AA up vs CA	0006468 // protein phosphorylation // inferred from electronic annotation /// 0006468 // protein phosphorylation // traceable author statement /// 0007049 // cell cycle // inferred from electronic annotation /// 0007067 // mitosis // inferred from electronic annotation /// 0007165 // signal transduction // non-traceable author statement /// 0007166 // cell surface receptor linked signaling pathwa…	0000775 // chromosome, centromeric region // inferred from electronic annotation /// 0000776 // kinetochore // inferred from electronic annotation /// 0000777 // condensed chromosome kinetochore // inferred from electronic annotation /// 0005737 // cytoplasm // inferred from electronic annotation /// 0005815 // microtubule organizing center // inferred from electronic annotation /// 0005829 // cy…	0000166 // nucleotide binding // inferred from electronic annotation /// 0004672 // protein kinase activity // traceable author statement /// 0004672 // protein kinase activity // inferred from electronic annotation /// 0004674 // protein serine/threonine kinase activity // inferred from electronic annotation /// 0005515 // protein binding // inferred from physical interaction /// 0005524 // ATP …	---
2880932	CSNK1A1	NM_001025105 // CSNK1A1 // casein kinase 1, alpha 1 // 5q32 // 1452 /// NM_00189	GGACAATTC	1.65542	chr5:148875555-148876308 (-) // 95.66 // q32	1.90738	0.931592	1.90738	AA up vs CA	0006468 // protein phosphorylation // inferred from electronic annotation /// 0006468 // protein phosphorylation // traceable author statement /// 0007049 // cell cycle // inferred from electronic annotation /// 0007067 // mitosis // inferred from electronic annotation /// 0007165 // signal transduction // non-traceable author statement /// 0007166 // cell surface receptor linked signaling pathwa…	0000775 // chromosome, centromeric region // inferred from electronic annotation /// 0000776 // kinetochore // inferred from electronic annotation /// 0000777 // condensed chromosome kinetochore // inferred from electronic annotation /// 0005737 // cytoplasm // inferred from electronic annotation /// 0005815 // microtubule organizing center // inferred from electronic annotation /// 0005829 // cy…	0000166 // nucleotide binding // inferred from electronic annotation /// 0004672 // protein kinase activity // traceable author statement /// 0004672 // protein kinase activity // inferred from electronic annotation /// 0004674 // protein serine/threonine kinase activity // inferred from electronic annotation /// 0005515 // protein binding // inferred from physical interaction /// 0005524 // ATP …	---
2880932	CSNK1A1	NM_001025105 // CSNK1A1 // casein kinase 1, alpha 1 // 5q32 // 1452 /// NM_00189	GGACAATTC	1.65542	chr5:148875629-148876158 (-) // 95.66 // q32	1.90738	0.931592	1.90738	AA up vs CA	0006468 // protein phosphorylation // inferred from electronic annotation /// 0006468 // protein phosphorylation // traceable author statement /// 0007049 // cell cycle // inferred from electronic annotation /// 0007067 // mitosis // inferred from electronic annotation /// 0007165 // signal transduction // non-traceable author statement /// 0007166 // cell surface receptor linked signaling pathwa…	0000775 // chromosome, centromeric region // inferred from electronic annotation /// 0000776 // kinetochore // inferred from electronic annotation /// 0000777 // condensed chromosome kinetochore // inferred from electronic annotation /// 0005737 // cytoplasm // inferred from electronic annotation /// 0005815 // microtubule organizing center // inferred from electronic annotation /// 0005829 // cy…	0000166 // nucleotide binding // inferred from electronic annotation /// 0004672 // protein kinase activity // traceable author statement /// 0004672 // protein kinase activity // inferred from electronic annotation /// 0004674 // protein serine/threonine kinase activity // inferred from electronic annotation /// 0005515 // protein binding // inferred from physical interaction /// 0005524 // ATP …	---
2527786	CTDSP1	NM_021198 // CTDSP1 // CTD (carboxy-terminal domain, RNA polymerase II, polypept	GGACACTGG	2.8087	chr2:219264477-219270663 (+) // 91.75 // q35	1.86136	0.896357	1.86136	AA up vs CA	0006357 // regulation of transcription from RNA polymerase II promoter // inferred from direct assay /// 0006470 // protein dephosphorylation // inferred from direct assay	0005634 // nucleus // inferred from direct assay /// 0005634 // nucleus // traceable author statement /// 0005634 // nucleus // inferred from electronic annotation	0004721 // phosphoprotein phosphatase activity // inferred from electronic annotation /// 0005515 // protein binding // inferred from physical interaction /// 0008420 // CTD phosphatase activity // inferred from direct assay /// 0016787 // hydrolase activity // inferred from electronic annotation /// 0016791 // phosphatase activity // inferred from electronic annotation /// 0046872 // metal ion b…	---
2527786	CTDSP1	NM_021198 // CTDSP1 // CTD (carboxy-terminal domain, RNA polymerase II, polypept	GGACACTCG	3.56324	chr2:219264477-219270663 (+) // 91.75 // q35	1.86136	0.896357	1.86136	AA up vs CA	0006357 // regulation of transcription from RNA polymerase II promoter // inferred from direct assay /// 0006470 // protein dephosphorylation // inferred from direct assay	0005634 // nucleus // inferred from direct assay /// 0005634 // nucleus // traceable author statement /// 0005634 // nucleus // inferred from electronic annotation	0004721 // phosphoprotein phosphatase activity // inferred from electronic annotation /// 0005515 // protein binding // inferred from physical interaction /// 0008420 // CTD phosphatase activity // inferred from direct assay /// 0016787 // hydrolase activity // inferred from electronic annotation /// 0016791 // phosphatase activity // inferred from electronic annotation /// 0046872 // metal ion b…	---
3378344	CTSF	NM_003793 // CTSF // cathepsin F // 11q13 // 8722 /// ENST00000310325 // CTSF //	GGACAGTCT	2.48201	chr11:66330939-66336047 (-) // 97.99 // q13.2	1.80136	0.849087	1.80136	AA up vs CA	0006508 // proteolysis // inferred from electronic annotation /// 0006508 // proteolysis // traceable author statement	0005764 // lysosome // inferred from electronic annotation /// 0005764 // lysosome // traceable author statement	0004197 // cysteine-type endopeptidase activity // inferred from electronic annotation /// 0004197 // cysteine-type endopeptidase activity // traceable author statement /// 0008233 // peptidase activity // inferred from electronic annotation /// 0008234 // cysteine-type peptidase activity // inferred from electronic annotation /// 0016787 // hydrolase activity // inferred from electronic annotati…	---
3634811	CTSH	NM_004390 // CTSH // cathepsin H // 15q25.1 // 1512 /// ENST00000220166 // CTSH	GGACATTTT	3.59934	chr15:79214115-79237351 (-) // 99.14 // q25.1	1.7672	0.821465	1.7672	AA up vs CA	0006508 // proteolysis // inferred from direct assay /// 0006508 // proteolysis // inferred from electronic annotation /// 0006508 // proteolysis // traceable author statement /// 0010634 // positive regulation of epithelial cell migration // inferred from electronic annotation /// 0031648 // protein destabilization // inferred from mutant phenotype /// 0032526 // response to retinoic acid // inf…	0005764 // lysosome // inferred from electronic annotation /// 0005783 // endoplasmic reticulum // inferred from direct assay /// 0043231 // intracellular membrane-bounded organelle // inferred from direct assay	0004197 // cysteine-type endopeptidase activity // inferred from direct assay /// 0004197 // cysteine-type endopeptidase activity // inferred from electronic annotation /// 0004197 // cysteine-type endopeptidase activity // traceable author statement /// 0005515 // protein binding // inferred from physical interaction /// 0008233 // peptidase activity // inferred from electronic annotation /// 00…	---
3634811	CTSH	NM_004390 // CTSH // cathepsin H // 15q25.1 // 1512 /// ENST00000220166 // CTSH	GGACAGAGC	4.24108	chr15:79214115-79237351 (-) // 99.14 // q25.1	1.7672	0.821465	1.7672	AA up vs CA	0006508 // proteolysis // inferred from direct assay /// 0006508 // proteolysis // inferred from electronic annotation /// 0006508 // proteolysis // traceable author statement /// 0010634 // positive regulation of epithelial cell migration // inferred from electronic annotation /// 0031648 // protein destabilization // inferred from mutant phenotype /// 0032526 // response to retinoic acid // inf…	0005764 // lysosome // inferred from electronic annotation /// 0005783 // endoplasmic reticulum // inferred from direct assay /// 0043231 // intracellular membrane-bounded organelle // inferred from direct assay	0004197 // cysteine-type endopeptidase activity // inferred from direct assay /// 0004197 // cysteine-type endopeptidase activity // inferred from electronic annotation /// 0004197 // cysteine-type endopeptidase activity // traceable author statement /// 0005515 // protein binding // inferred from physical interaction /// 0008233 // peptidase activity // inferred from electronic annotation /// 00…	---
2954355	CUL7	NM_001168370 // CUL7 // cullin 7 // 6p21.1 // 9820 /// NM_014780 // CUL7 // cull	GGTCTGTCC	4.99562	chr6:43005355-43021437 (-) // 99.28 // p21.1	1.89215	0.920026	1.89215	AA up vs CA	0001570 // vasculogenesis // inferred from sequence or structural similarity /// 0001570 // vasculogenesis // inferred from electronic annotation /// 0006508 // proteolysis // non-traceable author statement /// 0006511 // ubiquitin-dependent protein catabolic process // inferred from electronic annotation /// 0030071 // regulation of mitotic metaphase/anaphase transition // inferred from electron…	0005680 // anaphase-promoting complex // non-traceable author statement /// 0005680 // anaphase-promoting complex // inferred from electronic annotation /// 0005737 // cytoplasm // inferred from electronic annotation /// 0031461 // cullin-RING ubiquitin ligase complex // inferred from electronic annotation	0005488 // binding // inferred from electronic annotation /// 0005515 // protein binding // inferred from physical interaction /// 0005515 // protein binding // inferred from electronic annotation /// 0031625 // ubiquitin protein ligase binding // inferred from electronic annotation	---
2954355	CUL7	NM_001168370 // CUL7 // cullin 7 // 6p21.1 // 9820 /// NM_014780 // CUL7 // cull	GGACACTGG	2.8087	chr6:43005355-43021437 (-) // 99.28 // p21.1	1.89215	0.920026	1.89215	AA up vs CA	0001570 // vasculogenesis // inferred from sequence or structural similarity /// 0001570 // vasculogenesis // inferred from electronic annotation /// 0006508 // proteolysis // non-traceable author statement /// 0006511 // ubiquitin-dependent protein catabolic process // inferred from electronic annotation /// 0030071 // regulation of mitotic metaphase/anaphase transition // inferred from electron…	0005680 // anaphase-promoting complex // non-traceable author statement /// 0005680 // anaphase-promoting complex // inferred from electronic annotation /// 0005737 // cytoplasm // inferred from electronic annotation /// 0031461 // cullin-RING ubiquitin ligase complex // inferred from electronic annotation	0005488 // binding // inferred from electronic annotation /// 0005515 // protein binding // inferred from physical interaction /// 0005515 // protein binding // inferred from electronic annotation /// 0031625 // ubiquitin protein ligase binding // inferred from electronic annotation	---
2954355	CUL7	NM_001168370 // CUL7 // cullin 7 // 6p21.1 // 9820 /// NM_014780 // CUL7 // cull	GGTCTGTCC	4.99562	chr6:43005354-43021602 (-) // 94.72 // p21.1	1.89215	0.920026	1.89215	AA up vs CA	0001570 // vasculogenesis // inferred from sequence or structural similarity /// 0001570 // vasculogenesis // inferred from electronic annotation /// 0006508 // proteolysis // non-traceable author statement /// 0006511 // ubiquitin-dependent protein catabolic process // inferred from electronic annotation /// 0030071 // regulation of mitotic metaphase/anaphase transition // inferred from electron…	0005680 // anaphase-promoting complex // non-traceable author statement /// 0005680 // anaphase-promoting complex // inferred from electronic annotation /// 0005737 // cytoplasm // inferred from electronic annotation /// 0031461 // cullin-RING ubiquitin ligase complex // inferred from electronic annotation	0005488 // binding // inferred from electronic annotation /// 0005515 // protein binding // inferred from physical interaction /// 0005515 // protein binding // inferred from electronic annotation /// 0031625 // ubiquitin protein ligase binding // inferred from electronic annotation	---
2954355	CUL7	NM_001168370 // CUL7 // cullin 7 // 6p21.1 // 9820 /// NM_014780 // CUL7 // cull	GGACACTGG	2.8087	chr6:43005354-43021602 (-) // 94.72 // p21.1	1.89215	0.920026	1.89215	AA up vs CA	0001570 // vasculogenesis // inferred from sequence or structural similarity /// 0001570 // vasculogenesis // inferred from electronic annotation /// 0006508 // proteolysis // non-traceable author statement /// 0006511 // ubiquitin-dependent protein catabolic process // inferred from electronic annotation /// 0030071 // regulation of mitotic metaphase/anaphase transition // inferred from electron…	0005680 // anaphase-promoting complex // non-traceable author statement /// 0005680 // anaphase-promoting complex // inferred from electronic annotation /// 0005737 // cytoplasm // inferred from electronic annotation /// 0031461 // cullin-RING ubiquitin ligase complex // inferred from electronic annotation	0005488 // binding // inferred from electronic annotation /// 0005515 // protein binding // inferred from physical interaction /// 0005515 // protein binding // inferred from electronic annotation /// 0031625 // ubiquitin protein ligase binding // inferred from electronic annotation	---
2773958	CXCL10	NM_001565 // CXCL10 // chemokine (C-X-C motif) ligand 10 // 4q21 // 3627 /// ENS	GGACTGTCC	0.75454	chr4:76942272-76944650 (-) // 99.66 // q21.1	2.10588	1.07442	2.10588	AA up vs CA	0002690 // positive regulation of leukocyte chemotaxis // inferred from electronic annotation /// 0006935 // chemotaxis // inferred from electronic annotation /// 0006935 // chemotaxis // traceable author statement /// 0006954 // inflammatory response // inferred from electronic annotation /// 0006954 // inflammatory response // traceable author statement /// 0006955 // immune response // inferre…	0005576 // extracellular region // not recorded /// 0005576 // extracellular region // inferred from electronic annotation /// 0005615 // extracellular space // inferred from electronic annotation	0005102 // receptor binding // traceable author statement /// 0005125 // cytokine activity // inferred from electronic annotation /// 0008009 // chemokine activity // inferred from electronic annotation /// 0008009 // chemokine activity // traceable author statement /// 0008603 // cAMP-dependent protein kinase regulator activity // traceable author statement	---
3272981	CYP2E1	NM_000773 // CYP2E1 // cytochrome P450, family 2, subfamily E, polypeptide 1 //	GGACAGTGG	2.15934	chr10:135340899-135352468 (+) // 99.87 // q26.3	0.57971	-0.786597	-1.725	AA down vs CA	0008202 // steroid metabolic process // inferred from mutant phenotype /// 0010243 // response to organic nitrogen // inferred from electronic annotation /// 0016098 // monoterpenoid metabolic process // inferred from direct assay /// 0017144 // drug metabolic process // inferred from direct assay /// 0017144 // drug metabolic process // inferred from mutant phenotype /// 0045471 // response to e…	0000139 // Golgi membrane // inferred from electronic annotation /// 0005739 // mitochondrion // inferred from electronic annotation /// 0005783 // endoplasmic reticulum // inferred from electronic annotation /// 0005789 // endoplasmic reticulum membrane // not recorded /// 0005789 // endoplasmic reticulum membrane // inferred from electronic annotation /// 0005792 // microsome // inferred from d…	0004497 // monooxygenase activity // inferred from direct assay /// 0004497 // monooxygenase activity // inferred from electronic annotation /// 0004497 // monooxygenase activity // traceable author statement /// 0005506 // iron ion binding // inferred from electronic annotation /// 0009055 // electron carrier activity // inferred from electronic annotation /// 0016491 // oxidoreductase activity …	---
3272981	CYP2E1	NM_000773 // CYP2E1 // cytochrome P450, family 2, subfamily E, polypeptide 1 //	GGACAGTGG	2.15934	chr10:135340894-135352520 (+) // 99.55 // q26.3	0.57971	-0.786597	-1.725	AA down vs CA	0008202 // steroid metabolic process // inferred from mutant phenotype /// 0010243 // response to organic nitrogen // inferred from electronic annotation /// 0016098 // monoterpenoid metabolic process // inferred from direct assay /// 0017144 // drug metabolic process // inferred from direct assay /// 0017144 // drug metabolic process // inferred from mutant phenotype /// 0045471 // response to e…	0000139 // Golgi membrane // inferred from electronic annotation /// 0005739 // mitochondrion // inferred from electronic annotation /// 0005783 // endoplasmic reticulum // inferred from electronic annotation /// 0005789 // endoplasmic reticulum membrane // not recorded /// 0005789 // endoplasmic reticulum membrane // inferred from electronic annotation /// 0005792 // microsome // inferred from d…	0004497 // monooxygenase activity // inferred from direct assay /// 0004497 // monooxygenase activity // inferred from electronic annotation /// 0004497 // monooxygenase activity // traceable author statement /// 0005506 // iron ion binding // inferred from electronic annotation /// 0009055 // electron carrier activity // inferred from electronic annotation /// 0016491 // oxidoreductase activity …	---
3272981	CYP2E1	NM_000773 // CYP2E1 // cytochrome P450, family 2, subfamily E, polypeptide 1 //	GGACAGTGG	2.15934	chr10:135340894-135352520 (+) // 99.55 // q26.3	0.57971	-0.786597	-1.725	AA down vs CA	0008202 // steroid metabolic process // inferred from mutant phenotype /// 0010243 // response to organic nitrogen // inferred from electronic annotation /// 0016098 // monoterpenoid metabolic process // inferred from direct assay /// 0017144 // drug metabolic process // inferred from direct assay /// 0017144 // drug metabolic process // inferred from mutant phenotype /// 0045471 // response to e…	0000139 // Golgi membrane // inferred from electronic annotation /// 0005739 // mitochondrion // inferred from electronic annotation /// 0005783 // endoplasmic reticulum // inferred from electronic annotation /// 0005789 // endoplasmic reticulum membrane // not recorded /// 0005789 // endoplasmic reticulum membrane // inferred from electronic annotation /// 0005792 // microsome // inferred from d…	0004497 // monooxygenase activity // inferred from direct assay /// 0004497 // monooxygenase activity // inferred from electronic annotation /// 0004497 // monooxygenase activity // traceable author statement /// 0005506 // iron ion binding // inferred from electronic annotation /// 0009055 // electron carrier activity // inferred from electronic annotation /// 0016491 // oxidoreductase activity …	---
3272981	CYP2E1	NM_000773 // CYP2E1 // cytochrome P450, family 2, subfamily E, polypeptide 1 //	GGACAGTGG	2.15934	chr10:135340873-135351348 (-) // 99.61 // q26.3	0.57971	-0.786597	-1.725	AA down vs CA	0008202 // steroid metabolic process // inferred from mutant phenotype /// 0010243 // response to organic nitrogen // inferred from electronic annotation /// 0016098 // monoterpenoid metabolic process // inferred from direct assay /// 0017144 // drug metabolic process // inferred from direct assay /// 0017144 // drug metabolic process // inferred from mutant phenotype /// 0045471 // response to e…	0000139 // Golgi membrane // inferred from electronic annotation /// 0005739 // mitochondrion // inferred from electronic annotation /// 0005783 // endoplasmic reticulum // inferred from electronic annotation /// 0005789 // endoplasmic reticulum membrane // not recorded /// 0005789 // endoplasmic reticulum membrane // inferred from electronic annotation /// 0005792 // microsome // inferred from d…	0004497 // monooxygenase activity // inferred from direct assay /// 0004497 // monooxygenase activity // inferred from electronic annotation /// 0004497 // monooxygenase activity // traceable author statement /// 0005506 // iron ion binding // inferred from electronic annotation /// 0009055 // electron carrier activity // inferred from electronic annotation /// 0016491 // oxidoreductase activity …	---
2400220	DDOST	NM_005216 // DDOST // dolichyl-diphosphooligosaccharide--protein glycosyltransfe	AAACTGTCC	2.73353	chr1:20978272-20987944 (-) // 82.79 // p36.12	1.74692	0.804814	1.74692	AA up vs CA	0006496 // protein amino acid terminal N-glycosylation // inferred from direct assay /// 0018279 // protein N-linked glycosylation via asparagine // inferred by curator /// 0018279 // protein N-linked glycosylation via asparagine // inferred from electronic annotation /// 0034097 // response to cytokine stimulus // inferred from direct assay /// 0042110 // T cell activation // inferred from direc…	0005783 // endoplasmic reticulum // inferred from electronic annotation /// 0005789 // endoplasmic reticulum membrane // inferred from electronic annotation /// 0005792 // microsome // inferred from direct assay /// 0008250 // oligosaccharyltransferase complex // traceable author statement /// 0016020 // membrane // inferred from electronic annotation /// 0016021 // integral to membrane // inferr…	0004579 // dolichyl-diphosphooligosaccharide-protein glycotransferase activity // inferred by curator /// 0004579 // dolichyl-diphosphooligosaccharide-protein glycotransferase activity // inferred from direct assay /// 0004579 // dolichyl-diphosphooligosaccharide-protein glycotransferase activity // inferred from electronic annotation /// 0005515 // protein binding // inferred from physical inter…	---
2400220	DDOST	NM_005216 // DDOST // dolichyl-diphosphooligosaccharide--protein glycosyltransfe	CAAGTGTCC	3.81475	chr1:20978272-20987944 (-) // 82.79 // p36.12	1.74692	0.804814	1.74692	AA up vs CA	0006496 // protein amino acid terminal N-glycosylation // inferred from direct assay /// 0018279 // protein N-linked glycosylation via asparagine // inferred by curator /// 0018279 // protein N-linked glycosylation via asparagine // inferred from electronic annotation /// 0034097 // response to cytokine stimulus // inferred from direct assay /// 0042110 // T cell activation // inferred from direc…	0005783 // endoplasmic reticulum // inferred from electronic annotation /// 0005789 // endoplasmic reticulum membrane // inferred from electronic annotation /// 0005792 // microsome // inferred from direct assay /// 0008250 // oligosaccharyltransferase complex // traceable author statement /// 0016020 // membrane // inferred from electronic annotation /// 0016021 // integral to membrane // inferr…	0004579 // dolichyl-diphosphooligosaccharide-protein glycotransferase activity // inferred by curator /// 0004579 // dolichyl-diphosphooligosaccharide-protein glycotransferase activity // inferred from direct assay /// 0004579 // dolichyl-diphosphooligosaccharide-protein glycotransferase activity // inferred from electronic annotation /// 0005515 // protein binding // inferred from physical inter…	---
2400220	DDOST	NM_005216 // DDOST // dolichyl-diphosphooligosaccharide--protein glycosyltransfe	AAACTGTCC	2.73353	chr1:20978680-20988000 (-) // 99.88 // p36.12	1.74692	0.804814	1.74692	AA up vs CA	0006496 // protein amino acid terminal N-glycosylation // inferred from direct assay /// 0018279 // protein N-linked glycosylation via asparagine // inferred by curator /// 0018279 // protein N-linked glycosylation via asparagine // inferred from electronic annotation /// 0034097 // response to cytokine stimulus // inferred from direct assay /// 0042110 // T cell activation // inferred from direc…	0005783 // endoplasmic reticulum // inferred from electronic annotation /// 0005789 // endoplasmic reticulum membrane // inferred from electronic annotation /// 0005792 // microsome // inferred from direct assay /// 0008250 // oligosaccharyltransferase complex // traceable author statement /// 0016020 // membrane // inferred from electronic annotation /// 0016021 // integral to membrane // inferr…	0004579 // dolichyl-diphosphooligosaccharide-protein glycotransferase activity // inferred by curator /// 0004579 // dolichyl-diphosphooligosaccharide-protein glycotransferase activity // inferred from direct assay /// 0004579 // dolichyl-diphosphooligosaccharide-protein glycotransferase activity // inferred from electronic annotation /// 0005515 // protein binding // inferred from physical inter…	---
2400220	DDOST	NM_005216 // DDOST // dolichyl-diphosphooligosaccharide--protein glycosyltransfe	CAAGTGTCC	3.81475	chr1:20978680-20988000 (-) // 99.88 // p36.12	1.74692	0.804814	1.74692	AA up vs CA	0006496 // protein amino acid terminal N-glycosylation // inferred from direct assay /// 0018279 // protein N-linked glycosylation via asparagine // inferred by curator /// 0018279 // protein N-linked glycosylation via asparagine // inferred from electronic annotation /// 0034097 // response to cytokine stimulus // inferred from direct assay /// 0042110 // T cell activation // inferred from direc…	0005783 // endoplasmic reticulum // inferred from electronic annotation /// 0005789 // endoplasmic reticulum membrane // inferred from electronic annotation /// 0005792 // microsome // inferred from direct assay /// 0008250 // oligosaccharyltransferase complex // traceable author statement /// 0016020 // membrane // inferred from electronic annotation /// 0016021 // integral to membrane // inferr…	0004579 // dolichyl-diphosphooligosaccharide-protein glycotransferase activity // inferred by curator /// 0004579 // dolichyl-diphosphooligosaccharide-protein glycotransferase activity // inferred from direct assay /// 0004579 // dolichyl-diphosphooligosaccharide-protein glycotransferase activity // inferred from electronic annotation /// 0005515 // protein binding // inferred from physical inter…	---
3766893	DDX5	NM_004396 // DDX5 // DEAD (Asp-Glu-Ala-Asp) box polypeptide 5 // 17q21 // 1655 /	CAAGTGTCC	3.81475	chr17:62495739-62502407 (-) // 99.57 // q23.3	1.85347	0.890229	1.85347	AA up vs CA	0006397 // mRNA processing // inferred from electronic annotation /// 0008380 // RNA splicing // inferred from electronic annotation /// 0016049 // cell growth // non-traceable author statement /// 0045941 // positive regulation of transcription // inferred from electronic annotation	0005634 // nucleus // non-traceable author statement /// 0005634 // nucleus // inferred from electronic annotation /// 0005681 // spliceosomal complex // inferred from electronic annotation /// 0005730 // nucleolus // inferred from electronic annotation /// 0030529 // ribonucleoprotein complex // inferred from direct assay	0000166 // nucleotide binding // inferred from electronic annotation /// 0003676 // nucleic acid binding // inferred from electronic annotation /// 0003712 // transcription cofactor activity // inferred from electronic annotation /// 0003723 // RNA binding // inferred from electronic annotation /// 0003724 // RNA helicase activity // non-traceable author statement /// 0003724 // RNA helicase acti…	---
3766893	DDX5	NM_004396 // DDX5 // DEAD (Asp-Glu-Ala-Asp) box polypeptide 5 // 17q21 // 1655 /	CAAGTGTCC	3.81475	chr17:62495739-62502407 (-) // 99.57 // q23.3	1.85347	0.890229	1.85347	AA up vs CA	0006397 // mRNA processing // inferred from electronic annotation /// 0008380 // RNA splicing // inferred from electronic annotation /// 0016049 // cell growth // non-traceable author statement /// 0045941 // positive regulation of transcription // inferred from electronic annotation	0005634 // nucleus // non-traceable author statement /// 0005634 // nucleus // inferred from electronic annotation /// 0005681 // spliceosomal complex // inferred from electronic annotation /// 0005730 // nucleolus // inferred from electronic annotation /// 0030529 // ribonucleoprotein complex // inferred from direct assay	0000166 // nucleotide binding // inferred from electronic annotation /// 0003676 // nucleic acid binding // inferred from electronic annotation /// 0003712 // transcription cofactor activity // inferred from electronic annotation /// 0003723 // RNA binding // inferred from electronic annotation /// 0003724 // RNA helicase activity // non-traceable author statement /// 0003724 // RNA helicase acti…	---
2427791	DENND2D	NM_024901 // DENND2D // DENN/MADD domain containing 2D // 1p13.3 // 79961 /// EN	ATAATGTCC	3.59934	chr1:111729802-111747031 (-) // 99.0 // p13.3	1.96377	0.973626	1.96377	AA up vs CA	---	---	---	---
3062523	DLX5	NM_005221 // DLX5 // distal-less homeobox 5 // 7q22 // 1749 /// ENST00000222598	GGACATTGT	2.59328	chr7:96649707-96654314 (-) // 88.79 // q21.3	0.461371	-1.116	-2.16745	AA down vs CA	0001501 // skeletal system development // traceable author statement /// 0001503 // ossification // inferred from electronic annotation /// 0001649 // osteoblast differentiation // inferred from sequence or structural similarity /// 0001649 // osteoblast differentiation // inferred from electronic annotation /// 0001958 // endochondral ossification // inferred from sequence or structural similari…	0005634 // nucleus // inferred from direct assay /// 0005634 // nucleus // inferred from electronic annotation /// 0005730 // nucleolus // inferred from direct assay /// 0005737 // cytoplasm // inferred from electronic annotation	0003677 // DNA binding // inferred from electronic annotation /// 0003700 // sequence-specific DNA binding transcription factor activity // inferred from electronic annotation /// 0005515 // protein binding // inferred from electronic annotation /// 0010843 // promoter binding // inferred from direct assay /// 0010843 // promoter binding // inferred from electronic annotation /// 0016563 // trans…	---
3062523	DLX5	NM_005221 // DLX5 // distal-less homeobox 5 // 7q22 // 1749 /// ENST00000222598	ACATTGTCC	2.37683	chr7:96649707-96654314 (-) // 88.79 // q21.3	0.461371	-1.116	-2.16745	AA down vs CA	0001501 // skeletal system development // traceable author statement /// 0001503 // ossification // inferred from electronic annotation /// 0001649 // osteoblast differentiation // inferred from sequence or structural similarity /// 0001649 // osteoblast differentiation // inferred from electronic annotation /// 0001958 // endochondral ossification // inferred from sequence or structural similari…	0005634 // nucleus // inferred from direct assay /// 0005634 // nucleus // inferred from electronic annotation /// 0005730 // nucleolus // inferred from direct assay /// 0005737 // cytoplasm // inferred from electronic annotation	0003677 // DNA binding // inferred from electronic annotation /// 0003700 // sequence-specific DNA binding transcription factor activity // inferred from electronic annotation /// 0005515 // protein binding // inferred from electronic annotation /// 0010843 // promoter binding // inferred from direct assay /// 0010843 // promoter binding // inferred from electronic annotation /// 0016563 // trans…	---
2600155	DNPEP	NM_012100 // DNPEP // aspartyl aminopeptidase // 2q35 // 23549 /// ENST000002730	GGACATTTA	2.73561	chr2:220238916-220252629 (-) // 98.29 // q35	2.05535	1.03938	2.05535	AA up vs CA	0006508 // proteolysis // inferred from electronic annotation /// 0006518 // peptide metabolic process // traceable author statement	0005737 // cytoplasm // inferred from electronic annotation /// 0005737 // cytoplasm // traceable author statement /// 0005773 // vacuole // inferred from electronic annotation	0004177 // aminopeptidase activity // inferred from electronic annotation /// 0004177 // aminopeptidase activity // traceable author statement /// 0005515 // protein binding // inferred from physical interaction /// 0008233 // peptidase activity // inferred from electronic annotation /// 0008237 // metallopeptidase activity // inferred from electronic annotation /// 0008270 // zinc ion binding //…	---
2600155	DNPEP	NM_012100 // DNPEP // aspartyl aminopeptidase // 2q35 // 23549 /// ENST000002730	GGACATTTA	2.73561	chr2:220249307-220252481 (-) // 82.24 // q35	2.05535	1.03938	2.05535	AA up vs CA	0006508 // proteolysis // inferred from electronic annotation /// 0006518 // peptide metabolic process // traceable author statement	0005737 // cytoplasm // inferred from electronic annotation /// 0005737 // cytoplasm // traceable author statement /// 0005773 // vacuole // inferred from electronic annotation	0004177 // aminopeptidase activity // inferred from electronic annotation /// 0004177 // aminopeptidase activity // traceable author statement /// 0005515 // protein binding // inferred from physical interaction /// 0008233 // peptidase activity // inferred from electronic annotation /// 0008237 // metallopeptidase activity // inferred from electronic annotation /// 0008270 // zinc ion binding //…	---
2600155	DNPEP	NM_012100 // DNPEP // aspartyl aminopeptidase // 2q35 // 23549 /// ENST000002730	GGACATTTA	2.73561	chr2:220238611-220252629 (-) // 86.98 // q35	2.05535	1.03938	2.05535	AA up vs CA	0006508 // proteolysis // inferred from electronic annotation /// 0006518 // peptide metabolic process // traceable author statement	0005737 // cytoplasm // inferred from electronic annotation /// 0005737 // cytoplasm // traceable author statement /// 0005773 // vacuole // inferred from electronic annotation	0004177 // aminopeptidase activity // inferred from electronic annotation /// 0004177 // aminopeptidase activity // traceable author statement /// 0005515 // protein binding // inferred from physical interaction /// 0008233 // peptidase activity // inferred from electronic annotation /// 0008237 // metallopeptidase activity // inferred from electronic annotation /// 0008270 // zinc ion binding //…	---
2333635	DPH2	NM_001384 // DPH2 // DPH2 homolog (S. cerevisiae) // 1p34 // 1802 /// NM_0010395	GGACATTCC	1.62036	chr1:44435699-44439041 (+) // 83.27 // p34.1	1.84485	0.883504	1.84485	AA up vs CA	0017183 // peptidyl-diphthamide biosynthetic process from peptidyl-histidine // inferred from electronic annotation	---	0005515 // protein binding // inferred from electronic annotation	---
3065601	DPY19L2P2	NR_027768 // DPY19L2P2 // dpy-19-like 2 pseudogene 2 (C. elegans) // 7q22.1 // 3	TGACTGTCC	1.61828	chr12:64053558-64055463 (-) // 61.53 // q14.2 /// chr7:102910392-102912520 (-) // 64.43 // q22.1 /// chr7:35217078-35218968 (-) // 63.03 // p14.2 /// chr7:32791700-32795230 (-) // 57.8 // p14.3	0.478621	-1.06304	-2.08933	AA down vs CA	---	0016020 // membrane // inferred from electronic annotation /// 0016021 // integral to membrane // inferred from electronic annotation	---	---
2544781	DTNB	NM_021907 // DTNB // dystrobrevin, beta // 2p24 // 1838 /// NM_033147 // DTNB //	CTAATGTCC	4.03121	chr2:25600113-25610230 (-) // 94.55 // p23.3	1.7508	0.808014	1.7508	AA up vs CA	---	0005737 // cytoplasm // inferred from electronic annotation /// 0045202 // synapse // inferred from electronic annotation	0005509 // calcium ion binding // inferred from electronic annotation /// 0005515 // protein binding // inferred from electronic annotation /// 0008270 // zinc ion binding // inferred from electronic annotation /// 0046872 // metal ion binding // inferred from electronic annotation	---
2544781	DTNB	NM_021907 // DTNB // dystrobrevin, beta // 2p24 // 1838 /// NM_033147 // DTNB //	CTAATGTCC	4.03121	chr2:25641562-25875529 (-) // 90.17 // p23.3	1.7508	0.808014	1.7508	AA up vs CA	---	0005737 // cytoplasm // inferred from electronic annotation /// 0045202 // synapse // inferred from electronic annotation	0005509 // calcium ion binding // inferred from electronic annotation /// 0005515 // protein binding // inferred from electronic annotation /// 0008270 // zinc ion binding // inferred from electronic annotation /// 0046872 // metal ion binding // inferred from electronic annotation	---
3464860	DUSP6	NM_001946 // DUSP6 // dual specificity phosphatase 6 // 12q22-q23 // 1848 /// NM	GGACAAAGC	4.89044	chr12:89741838-89746164 (-) // 99.0 // q21.33	1.76501	0.819676	1.76501	AA up vs CA	0000188 // inactivation of MAPK activity // inferred from direct assay /// 0001933 // negative regulation of protein phosphorylation // inferred from electronic annotation /// 0006470 // protein dephosphorylation // inferred from electronic annotation /// 0014070 // response to organic cyclic substance // inferred from electronic annotation /// 0016311 // dephosphorylation // inferred from electr…	0005654 // nucleoplasm // not recorded /// 0005737 // cytoplasm // inferred from direct assay /// 0005737 // cytoplasm // inferred from electronic annotation	0004721 // phosphoprotein phosphatase activity // inferred from electronic annotation /// 0004725 // protein tyrosine phosphatase activity // not recorded /// 0004725 // protein tyrosine phosphatase activity // inferred from electronic annotation /// 0005515 // protein binding // inferred from electronic annotation /// 0008138 // protein tyrosine/serine/threonine phosphatase activity // inferred …	---
3464860	DUSP6	NM_001946 // DUSP6 // dual specificity phosphatase 6 // 12q22-q23 // 1848 /// NM	GGACAAAGC	4.89044	chr12:89741838-89746164 (-) // 99.0 // q21.33	1.76501	0.819676	1.76501	AA up vs CA	0000188 // inactivation of MAPK activity // inferred from direct assay /// 0001933 // negative regulation of protein phosphorylation // inferred from electronic annotation /// 0006470 // protein dephosphorylation // inferred from electronic annotation /// 0014070 // response to organic cyclic substance // inferred from electronic annotation /// 0016311 // dephosphorylation // inferred from electr…	0005654 // nucleoplasm // not recorded /// 0005737 // cytoplasm // inferred from direct assay /// 0005737 // cytoplasm // inferred from electronic annotation	0004721 // phosphoprotein phosphatase activity // inferred from electronic annotation /// 0004725 // protein tyrosine phosphatase activity // not recorded /// 0004725 // protein tyrosine phosphatase activity // inferred from electronic annotation /// 0005515 // protein binding // inferred from electronic annotation /// 0008138 // protein tyrosine/serine/threonine phosphatase activity // inferred …	---
3464860	DUSP6	NM_001946 // DUSP6 // dual specificity phosphatase 6 // 12q22-q23 // 1848 /// NM	GGACAAAGC	4.89044	chr12:89742405-89746240 (-) // 99.14 // q21.33	1.76501	0.819676	1.76501	AA up vs CA	0000188 // inactivation of MAPK activity // inferred from direct assay /// 0001933 // negative regulation of protein phosphorylation // inferred from electronic annotation /// 0006470 // protein dephosphorylation // inferred from electronic annotation /// 0014070 // response to organic cyclic substance // inferred from electronic annotation /// 0016311 // dephosphorylation // inferred from electr…	0005654 // nucleoplasm // not recorded /// 0005737 // cytoplasm // inferred from direct assay /// 0005737 // cytoplasm // inferred from electronic annotation	0004721 // phosphoprotein phosphatase activity // inferred from electronic annotation /// 0004725 // protein tyrosine phosphatase activity // not recorded /// 0004725 // protein tyrosine phosphatase activity // inferred from electronic annotation /// 0005515 // protein binding // inferred from electronic annotation /// 0008138 // protein tyrosine/serine/threonine phosphatase activity // inferred …	---
2608801	EDEM1	NM_014674 // EDEM1 // ER degradation enhancer, mannosidase alpha-like 1 // 3p26.	GAACTGTCC	1.00606	chr3:5229432-5261642 (+) // 96.57 // p26.1	1.84671	0.884957	1.84671	AA up vs CA	0006986 // response to unfolded protein // inferred from electronic annotation /// 0030433 // ER-associated protein catabolic process // inferred from sequence or structural similarity /// 0030433 // ER-associated protein catabolic process // inferred from electronic annotation	0005783 // endoplasmic reticulum // inferred from electronic annotation /// 0005789 // endoplasmic reticulum membrane // inferred from electronic annotation /// 0016020 // membrane // inferred from electronic annotation /// 0016021 // integral to membrane // inferred from electronic annotation /// 0030176 // integral to endoplasmic reticulum membrane // inferred from sequence or structural simila…	0004571 // mannosyl-oligosaccharide 1,2-alpha-mannosidase activity // inferred from electronic annotation /// 0005509 // calcium ion binding // inferred from electronic annotation /// 0005515 // protein binding // inferred from physical interaction /// 0051787 // misfolded protein binding // inferred from direct assay	---
2447824	EDEM3	NM_025191 // EDEM3 // ER degradation enhancer, mannosidase alpha-like 3 // 1q25	GGACAGTGC	0	chr1:184661996-184663258 (-) // 99.92 // q25.3	1.78324	0.834501	1.78324	AA up vs CA	0006986 // response to unfolded protein // inferred from electronic annotation	0005783 // endoplasmic reticulum // inferred from electronic annotation /// 0005788 // endoplasmic reticulum lumen // inferred from electronic annotation /// 0016020 // membrane // inferred from electronic annotation	0004571 // mannosyl-oligosaccharide 1,2-alpha-mannosidase activity // inferred from electronic annotation /// 0005509 // calcium ion binding // inferred from electronic annotation	---
2447824	EDEM3	NM_025191 // EDEM3 // ER degradation enhancer, mannosidase alpha-like 3 // 1q25	GGACAGTGC	0	chr1:184659947-184723997 (-) // 99.79 // q25.3	1.78324	0.834501	1.78324	AA up vs CA	0006986 // response to unfolded protein // inferred from electronic annotation	0005783 // endoplasmic reticulum // inferred from electronic annotation /// 0005788 // endoplasmic reticulum lumen // inferred from electronic annotation /// 0016020 // membrane // inferred from electronic annotation	0004571 // mannosyl-oligosaccharide 1,2-alpha-mannosidase activity // inferred from electronic annotation /// 0005509 // calcium ion binding // inferred from electronic annotation	---
2408643	EDN2	NM_001956 // EDN2 // endothelin 2 // 1p34 // 1907 /// ENST00000372587 // EDN2 //	GCTGTGTCC	4.89044	chr1:41944446-41950342 (-) // 99.84 // p34.2	0.563739	-0.826901	-1.77387	AA down vs CA	0001516 // prostaglandin biosynthetic process // inferred from direct assay /// 0001516 // prostaglandin biosynthetic process // inferred from electronic annotation /// 0001543 // ovarian follicle rupture // inferred from electronic annotation /// 0002690 // positive regulation of leukocyte chemotaxis // inferred from direct assay /// 0003058 // hormonal regulation of the force of heart contracti…	0005576 // extracellular region // not recorded /// 0005576 // extracellular region // inferred from electronic annotation /// 0005615 // extracellular space // inferred from direct assay /// 0005615 // extracellular space // inferred from electronic annotation	0005179 // hormone activity // inferred from direct assay /// 0031708 // endothelin B receptor binding // inferred from physical interaction	---
2408643	EDN2	NM_001956 // EDN2 // endothelin 2 // 1p34 // 1907 /// ENST00000372587 // EDN2 //	GCGGTGTCC	4.89044	chr1:41944446-41950342 (-) // 99.84 // p34.2	0.563739	-0.826901	-1.77387	AA down vs CA	0001516 // prostaglandin biosynthetic process // inferred from direct assay /// 0001516 // prostaglandin biosynthetic process // inferred from electronic annotation /// 0001543 // ovarian follicle rupture // inferred from electronic annotation /// 0002690 // positive regulation of leukocyte chemotaxis // inferred from direct assay /// 0003058 // hormonal regulation of the force of heart contracti…	0005576 // extracellular region // not recorded /// 0005576 // extracellular region // inferred from electronic annotation /// 0005615 // extracellular space // inferred from direct assay /// 0005615 // extracellular space // inferred from electronic annotation	0005179 // hormone activity // inferred from direct assay /// 0031708 // endothelin B receptor binding // inferred from physical interaction	---
3557408	EFS	NM_005864 // EFS // embryonal Fyn-associated substrate // 14q11.2-q12 // 10278 /	TCAGTGTCC	1.5131	chr14:23825614-23834842 (-) // 96.69 // q11.2	0.549793	-0.86304	-1.81887	AA down vs CA	0007155 // cell adhesion // inferred from electronic annotation /// 0023034 // intracellular signaling pathway // traceable author statement	0005737 // cytoplasm // traceable author statement	0005515 // protein binding // inferred from physical interaction /// 0017124 // SH3 domain binding // inferred from electronic annotation /// 0019904 // protein domain specific binding // inferred from physical interaction	---
3557408	EFS	NM_005864 // EFS // embryonal Fyn-associated substrate // 14q11.2-q12 // 10278 /	TCAGTGTCC	1.5131	chr14:23825871-23834842 (-) // 96.0 // q11.2	0.549793	-0.86304	-1.81887	AA down vs CA	0007155 // cell adhesion // inferred from electronic annotation /// 0023034 // intracellular signaling pathway // traceable author statement	0005737 // cytoplasm // traceable author statement	0005515 // protein binding // inferred from physical interaction /// 0017124 // SH3 domain binding // inferred from electronic annotation /// 0019904 // protein domain specific binding // inferred from physical interaction	---
2563654	EIF2AK3	NM_004836 // EIF2AK3 // eukaryotic translation initiation factor 2-alpha kinase	GGACAGTCC	0.75454	chr2:88856349-88926864 (-) // 95.28 // p11.2	1.77424	0.827201	1.77424	AA up vs CA	0001501 // skeletal system development // inferred from sequence or structural similarity /// 0001501 // skeletal system development // inferred from electronic annotation /// 0001503 // ossification // inferred from mutant phenotype /// 0002063 // chondrocyte development // inferred from sequence or structural similarity /// 0002063 // chondrocyte development // inferred from electronic annotati…	0005623 // cell // inferred from electronic annotation /// 0005737 // cytoplasm // inferred from sequence or structural similarity /// 0005737 // cytoplasm // inferred from electronic annotation /// 0005783 // endoplasmic reticulum // inferred by curator /// 0005783 // endoplasmic reticulum // inferred from sequence or structural similarity /// 0005783 // endoplasmic reticulum // traceable author…	0000166 // nucleotide binding // inferred from electronic annotation /// 0003743 // translation initiation factor activity // inferred from electronic annotation /// 0004672 // protein kinase activity // traceable author statement /// 0004672 // protein kinase activity // inferred from electronic annotation /// 0004674 // protein serine/threonine kinase activity // inferred from sequence or struc…	Translation_Factors // GenMAPP
3591963	EIF3J	NM_003758 // EIF3J // eukaryotic translation initiation factor 3, subunit J // 1	GGACAGCGC	4.24108	chr15:44829332-44854999 (+) // 95.21 // q21.1 /// chrX:81752264-81753394 (-) // 41.22 // q21.1	1.98156	0.986637	1.98156	AA up vs CA	0006412 // translation // inferred from electronic annotation /// 0006413 // translational initiation // inferred by curator	0005737 // cytoplasm // inferred from electronic annotation /// 0005829 // cytosol // not recorded /// 0005852 // eukaryotic translation initiation factor 3 complex // inferred from direct assay	0003743 // translation initiation factor activity // inferred by curator /// 0003743 // translation initiation factor activity // inferred from electronic annotation /// 0005515 // protein binding // inferred from physical interaction	Translation_Factors // GenMAPP
3591963	EIF3J	NM_003758 // EIF3J // eukaryotic translation initiation factor 3, subunit J // 1	GGACAGCGC	4.24108	chr15:44829332-44854284 (+) // 93.45 // q21.1 /// chr3:149768454-149770384 (+) // 83.84 // q25.1 /// chrX:81752264-81753394 (-) // 59.63 // q21.1	1.98156	0.986637	1.98156	AA up vs CA	0006412 // translation // inferred from electronic annotation /// 0006413 // translational initiation // inferred by curator	0005737 // cytoplasm // inferred from electronic annotation /// 0005829 // cytosol // not recorded /// 0005852 // eukaryotic translation initiation factor 3 complex // inferred from direct assay	0003743 // translation initiation factor activity // inferred by curator /// 0003743 // translation initiation factor activity // inferred from electronic annotation /// 0005515 // protein binding // inferred from physical interaction	Translation_Factors // GenMAPP
3362719	EIF4G2	NM_001418 // EIF4G2 // eukaryotic translation initiation factor 4 gamma, 2 // 11	GGACATTCC	1.62036	chr11:10818601-10830471 (-) // 97.46 // p15.3	1.76855	0.822567	1.76855	AA up vs CA	0006412 // translation // inferred from electronic annotation /// 0006417 // regulation of translation // inferred from electronic annotation /// 0006446 // regulation of translational initiation // inferred from direct assay /// 0006446 // regulation of translational initiation // inferred from electronic annotation /// 0007050 // cell cycle arrest // traceable author statement /// 0008219 // ce…	0005737 // cytoplasm // inferred from electronic annotation /// 0016281 // eukaryotic translation initiation factor 4F complex // inferred from direct assay	0003743 // translation initiation factor activity // inferred from direct assay /// 0003743 // translation initiation factor activity // inferred from electronic annotation /// 0005488 // binding // inferred from electronic annotation /// 0005515 // protein binding // inferred from physical interaction /// 0005515 // protein binding // inferred from electronic annotation /// 0008135 // translatio…	Circadian_Exercise // GenMAPP
3362719	EIF4G2	NM_001418 // EIF4G2 // eukaryotic translation initiation factor 4 gamma, 2 // 11	GTAGTGTCC	1.65542	chr11:10818601-10830471 (-) // 97.46 // p15.3	1.76855	0.822567	1.76855	AA up vs CA	0006412 // translation // inferred from electronic annotation /// 0006417 // regulation of translation // inferred from electronic annotation /// 0006446 // regulation of translational initiation // inferred from direct assay /// 0006446 // regulation of translational initiation // inferred from electronic annotation /// 0007050 // cell cycle arrest // traceable author statement /// 0008219 // ce…	0005737 // cytoplasm // inferred from electronic annotation /// 0016281 // eukaryotic translation initiation factor 4F complex // inferred from direct assay	0003743 // translation initiation factor activity // inferred from direct assay /// 0003743 // translation initiation factor activity // inferred from electronic annotation /// 0005488 // binding // inferred from electronic annotation /// 0005515 // protein binding // inferred from physical interaction /// 0005515 // protein binding // inferred from electronic annotation /// 0008135 // translatio…	Circadian_Exercise // GenMAPP
3362719	EIF4G2	NM_001418 // EIF4G2 // eukaryotic translation initiation factor 4 gamma, 2 // 11	GGACATTTT	3.59934	chr11:10818601-10830471 (-) // 97.46 // p15.3	1.76855	0.822567	1.76855	AA up vs CA	0006412 // translation // inferred from electronic annotation /// 0006417 // regulation of translation // inferred from electronic annotation /// 0006446 // regulation of translational initiation // inferred from direct assay /// 0006446 // regulation of translational initiation // inferred from electronic annotation /// 0007050 // cell cycle arrest // traceable author statement /// 0008219 // ce…	0005737 // cytoplasm // inferred from electronic annotation /// 0016281 // eukaryotic translation initiation factor 4F complex // inferred from direct assay	0003743 // translation initiation factor activity // inferred from direct assay /// 0003743 // translation initiation factor activity // inferred from electronic annotation /// 0005488 // binding // inferred from electronic annotation /// 0005515 // protein binding // inferred from physical interaction /// 0005515 // protein binding // inferred from electronic annotation /// 0008135 // translatio…	Circadian_Exercise // GenMAPP
3362719	EIF4G2	NM_001418 // EIF4G2 // eukaryotic translation initiation factor 4 gamma, 2 // 11	GGACATTCC	1.62036	chr11:10828620-10828881 (-) // 99.62 // p15.3	1.76855	0.822567	1.76855	AA up vs CA	0006412 // translation // inferred from electronic annotation /// 0006417 // regulation of translation // inferred from electronic annotation /// 0006446 // regulation of translational initiation // inferred from direct assay /// 0006446 // regulation of translational initiation // inferred from electronic annotation /// 0007050 // cell cycle arrest // traceable author statement /// 0008219 // ce…	0005737 // cytoplasm // inferred from electronic annotation /// 0016281 // eukaryotic translation initiation factor 4F complex // inferred from direct assay	0003743 // translation initiation factor activity // inferred from direct assay /// 0003743 // translation initiation factor activity // inferred from electronic annotation /// 0005488 // binding // inferred from electronic annotation /// 0005515 // protein binding // inferred from physical interaction /// 0005515 // protein binding // inferred from electronic annotation /// 0008135 // translatio…	Circadian_Exercise // GenMAPP
3362719	EIF4G2	NM_001418 // EIF4G2 // eukaryotic translation initiation factor 4 gamma, 2 // 11	GTAGTGTCC	1.65542	chr11:10828620-10828881 (-) // 99.62 // p15.3	1.76855	0.822567	1.76855	AA up vs CA	0006412 // translation // inferred from electronic annotation /// 0006417 // regulation of translation // inferred from electronic annotation /// 0006446 // regulation of translational initiation // inferred from direct assay /// 0006446 // regulation of translational initiation // inferred from electronic annotation /// 0007050 // cell cycle arrest // traceable author statement /// 0008219 // ce…	0005737 // cytoplasm // inferred from electronic annotation /// 0016281 // eukaryotic translation initiation factor 4F complex // inferred from direct assay	0003743 // translation initiation factor activity // inferred from direct assay /// 0003743 // translation initiation factor activity // inferred from electronic annotation /// 0005488 // binding // inferred from electronic annotation /// 0005515 // protein binding // inferred from physical interaction /// 0005515 // protein binding // inferred from electronic annotation /// 0008135 // translatio…	Circadian_Exercise // GenMAPP
3362719	EIF4G2	NM_001418 // EIF4G2 // eukaryotic translation initiation factor 4 gamma, 2 // 11	GGACATTTT	3.59934	chr11:10828620-10828881 (-) // 99.62 // p15.3	1.76855	0.822567	1.76855	AA up vs CA	0006412 // translation // inferred from electronic annotation /// 0006417 // regulation of translation // inferred from electronic annotation /// 0006446 // regulation of translational initiation // inferred from direct assay /// 0006446 // regulation of translational initiation // inferred from electronic annotation /// 0007050 // cell cycle arrest // traceable author statement /// 0008219 // ce…	0005737 // cytoplasm // inferred from electronic annotation /// 0016281 // eukaryotic translation initiation factor 4F complex // inferred from direct assay	0003743 // translation initiation factor activity // inferred from direct assay /// 0003743 // translation initiation factor activity // inferred from electronic annotation /// 0005488 // binding // inferred from electronic annotation /// 0005515 // protein binding // inferred from physical interaction /// 0005515 // protein binding // inferred from electronic annotation /// 0008135 // translatio…	Circadian_Exercise // GenMAPP
2495881	EIF5B	NM_015904 // EIF5B // eukaryotic translation initiation factor 5B // 2q11.2 // 9	GCTGTGTCC	4.89044	chr2:99953789-100016579 (+) // 94.8 // q11.2	1.88661	0.915796	1.88661	AA up vs CA	0006412 // translation // inferred from electronic annotation /// 0006446 // regulation of translational initiation // inferred from direct assay /// 0006446 // regulation of translational initiation // non-traceable author statement	0005737 // cytoplasm // inferred from electronic annotation	0000166 // nucleotide binding // inferred from electronic annotation /// 0003743 // translation initiation factor activity // inferred from direct assay /// 0003743 // translation initiation factor activity // non-traceable author statement /// 0003743 // translation initiation factor activity // inferred from electronic annotation /// 0003924 // GTPase activity // inferred from electronic annota…	Translation_Factors // GenMAPP
2495881	EIF5B	NM_015904 // EIF5B // eukaryotic translation initiation factor 5B // 2q11.2 // 9	TCATTGTCC	1.5131	chr2:99953789-100016579 (+) // 94.8 // q11.2	1.88661	0.915796	1.88661	AA up vs CA	0006412 // translation // inferred from electronic annotation /// 0006446 // regulation of translational initiation // inferred from direct assay /// 0006446 // regulation of translational initiation // non-traceable author statement	0005737 // cytoplasm // inferred from electronic annotation	0000166 // nucleotide binding // inferred from electronic annotation /// 0003743 // translation initiation factor activity // inferred from direct assay /// 0003743 // translation initiation factor activity // non-traceable author statement /// 0003743 // translation initiation factor activity // inferred from electronic annotation /// 0003924 // GTPase activity // inferred from electronic annota…	Translation_Factors // GenMAPP
2495881	EIF5B	NM_015904 // EIF5B // eukaryotic translation initiation factor 5B // 2q11.2 // 9	GCTGTGTCC	4.89044	chr2:99953789-100016579 (+) // 94.8 // q11.2	1.88661	0.915796	1.88661	AA up vs CA	0006412 // translation // inferred from electronic annotation /// 0006446 // regulation of translational initiation // inferred from direct assay /// 0006446 // regulation of translational initiation // non-traceable author statement	0005737 // cytoplasm // inferred from electronic annotation	0000166 // nucleotide binding // inferred from electronic annotation /// 0003743 // translation initiation factor activity // inferred from direct assay /// 0003743 // translation initiation factor activity // non-traceable author statement /// 0003743 // translation initiation factor activity // inferred from electronic annotation /// 0003924 // GTPase activity // inferred from electronic annota…	Translation_Factors // GenMAPP
2495881	EIF5B	NM_015904 // EIF5B // eukaryotic translation initiation factor 5B // 2q11.2 // 9	TCATTGTCC	1.5131	chr2:99953789-100016579 (+) // 94.8 // q11.2	1.88661	0.915796	1.88661	AA up vs CA	0006412 // translation // inferred from electronic annotation /// 0006446 // regulation of translational initiation // inferred from direct assay /// 0006446 // regulation of translational initiation // non-traceable author statement	0005737 // cytoplasm // inferred from electronic annotation	0000166 // nucleotide binding // inferred from electronic annotation /// 0003743 // translation initiation factor activity // inferred from direct assay /// 0003743 // translation initiation factor activity // non-traceable author statement /// 0003743 // translation initiation factor activity // inferred from electronic annotation /// 0003924 // GTPase activity // inferred from electronic annota…	Translation_Factors // GenMAPP
2495881	EIF5B	NM_015904 // EIF5B // eukaryotic translation initiation factor 5B // 2q11.2 // 9	GCTGTGTCC	4.89044	chr2:99953899-100015997 (+) // 94.92 // q11.2	1.88661	0.915796	1.88661	AA up vs CA	0006412 // translation // inferred from electronic annotation /// 0006446 // regulation of translational initiation // inferred from direct assay /// 0006446 // regulation of translational initiation // non-traceable author statement	0005737 // cytoplasm // inferred from electronic annotation	0000166 // nucleotide binding // inferred from electronic annotation /// 0003743 // translation initiation factor activity // inferred from direct assay /// 0003743 // translation initiation factor activity // non-traceable author statement /// 0003743 // translation initiation factor activity // inferred from electronic annotation /// 0003924 // GTPase activity // inferred from electronic annota…	Translation_Factors // GenMAPP
2495881	EIF5B	NM_015904 // EIF5B // eukaryotic translation initiation factor 5B // 2q11.2 // 9	TCATTGTCC	1.5131	chr2:99953899-100015997 (+) // 94.92 // q11.2	1.88661	0.915796	1.88661	AA up vs CA	0006412 // translation // inferred from electronic annotation /// 0006446 // regulation of translational initiation // inferred from direct assay /// 0006446 // regulation of translational initiation // non-traceable author statement	0005737 // cytoplasm // inferred from electronic annotation	0000166 // nucleotide binding // inferred from electronic annotation /// 0003743 // translation initiation factor activity // inferred from direct assay /// 0003743 // translation initiation factor activity // non-traceable author statement /// 0003743 // translation initiation factor activity // inferred from electronic annotation /// 0003924 // GTPase activity // inferred from electronic annota…	Translation_Factors // GenMAPP
2495881	EIF5B	NM_015904 // EIF5B // eukaryotic translation initiation factor 5B // 2q11.2 // 9	GCTGTGTCC	4.89044	chr2:99980115-99980781 (+) // 52.17 // q11.2	1.88661	0.915796	1.88661	AA up vs CA	0006412 // translation // inferred from electronic annotation /// 0006446 // regulation of translational initiation // inferred from direct assay /// 0006446 // regulation of translational initiation // non-traceable author statement	0005737 // cytoplasm // inferred from electronic annotation	0000166 // nucleotide binding // inferred from electronic annotation /// 0003743 // translation initiation factor activity // inferred from direct assay /// 0003743 // translation initiation factor activity // non-traceable author statement /// 0003743 // translation initiation factor activity // inferred from electronic annotation /// 0003924 // GTPase activity // inferred from electronic annota…	Translation_Factors // GenMAPP
2495881	EIF5B	NM_015904 // EIF5B // eukaryotic translation initiation factor 5B // 2q11.2 // 9	TCATTGTCC	1.5131	chr2:99980115-99980781 (+) // 52.17 // q11.2	1.88661	0.915796	1.88661	AA up vs CA	0006412 // translation // inferred from electronic annotation /// 0006446 // regulation of translational initiation // inferred from direct assay /// 0006446 // regulation of translational initiation // non-traceable author statement	0005737 // cytoplasm // inferred from electronic annotation	0000166 // nucleotide binding // inferred from electronic annotation /// 0003743 // translation initiation factor activity // inferred from direct assay /// 0003743 // translation initiation factor activity // non-traceable author statement /// 0003743 // translation initiation factor activity // inferred from electronic annotation /// 0003924 // GTPase activity // inferred from electronic annota…	Translation_Factors // GenMAPP
2495881	EIF5B	NM_015904 // EIF5B // eukaryotic translation initiation factor 5B // 2q11.2 // 9	GCTGTGTCC	4.89044	chr2:99953789-100016579 (-) // 94.8 // q11.2	1.88661	0.915796	1.88661	AA up vs CA	0006412 // translation // inferred from electronic annotation /// 0006446 // regulation of translational initiation // inferred from direct assay /// 0006446 // regulation of translational initiation // non-traceable author statement	0005737 // cytoplasm // inferred from electronic annotation	0000166 // nucleotide binding // inferred from electronic annotation /// 0003743 // translation initiation factor activity // inferred from direct assay /// 0003743 // translation initiation factor activity // non-traceable author statement /// 0003743 // translation initiation factor activity // inferred from electronic annotation /// 0003924 // GTPase activity // inferred from electronic annota…	Translation_Factors // GenMAPP
2495881	EIF5B	NM_015904 // EIF5B // eukaryotic translation initiation factor 5B // 2q11.2 // 9	TCATTGTCC	1.5131	chr2:99953789-100016579 (-) // 94.8 // q11.2	1.88661	0.915796	1.88661	AA up vs CA	0006412 // translation // inferred from electronic annotation /// 0006446 // regulation of translational initiation // inferred from direct assay /// 0006446 // regulation of translational initiation // non-traceable author statement	0005737 // cytoplasm // inferred from electronic annotation	0000166 // nucleotide binding // inferred from electronic annotation /// 0003743 // translation initiation factor activity // inferred from direct assay /// 0003743 // translation initiation factor activity // non-traceable author statement /// 0003743 // translation initiation factor activity // inferred from electronic annotation /// 0003924 // GTPase activity // inferred from electronic annota…	Translation_Factors // GenMAPP
2495881	EIF5B	NM_015904 // EIF5B // eukaryotic translation initiation factor 5B // 2q11.2 // 9	GCTGTGTCC	4.89044	chr2:99980115-99980781 (-) // 52.17 // q11.2	1.88661	0.915796	1.88661	AA up vs CA	0006412 // translation // inferred from electronic annotation /// 0006446 // regulation of translational initiation // inferred from direct assay /// 0006446 // regulation of translational initiation // non-traceable author statement	0005737 // cytoplasm // inferred from electronic annotation	0000166 // nucleotide binding // inferred from electronic annotation /// 0003743 // translation initiation factor activity // inferred from direct assay /// 0003743 // translation initiation factor activity // non-traceable author statement /// 0003743 // translation initiation factor activity // inferred from electronic annotation /// 0003924 // GTPase activity // inferred from electronic annota…	Translation_Factors // GenMAPP
2495881	EIF5B	NM_015904 // EIF5B // eukaryotic translation initiation factor 5B // 2q11.2 // 9	TCATTGTCC	1.5131	chr2:99980115-99980781 (-) // 52.17 // q11.2	1.88661	0.915796	1.88661	AA up vs CA	0006412 // translation // inferred from electronic annotation /// 0006446 // regulation of translational initiation // inferred from direct assay /// 0006446 // regulation of translational initiation // non-traceable author statement	0005737 // cytoplasm // inferred from electronic annotation	0000166 // nucleotide binding // inferred from electronic annotation /// 0003743 // translation initiation factor activity // inferred from direct assay /// 0003743 // translation initiation factor activity // non-traceable author statement /// 0003743 // translation initiation factor activity // inferred from electronic annotation /// 0003924 // GTPase activity // inferred from electronic annota…	Translation_Factors // GenMAPP
3127878	ENTPD4	NM_001128930 // ENTPD4 // ectonucleoside triphosphate diphosphohydrolase 4 // 8p	GCGGTGTCC	4.89044	chr8:23286674-23315161 (-) // 85.82 // p21.3	1.81312	0.858474	1.81312	AA up vs CA	0006256 // UDP catabolic process // inferred from direct assay	0000139 // Golgi membrane // inferred from electronic annotation /// 0000421 // autophagic vacuole membrane // inferred from electronic annotation /// 0005794 // Golgi apparatus // inferred from electronic annotation /// 0016020 // membrane // inferred from electronic annotation /// 0016021 // integral to membrane // inferred from electronic annotation /// 0030173 // integral to Golgi membrane //…	0016787 // hydrolase activity // inferred from electronic annotation /// 0017110 // nucleoside-diphosphatase activity // inferred from electronic annotation /// 0045134 // uridine-diphosphatase activity // inferred from direct assay	---
3127878	ENTPD4	NM_001128930 // ENTPD4 // ectonucleoside triphosphate diphosphohydrolase 4 // 8p	GCGGTGTCC	4.89044	chr8:23290132-23315136 (-) // 91.85 // p21.3	1.81312	0.858474	1.81312	AA up vs CA	0006256 // UDP catabolic process // inferred from direct assay	0000139 // Golgi membrane // inferred from electronic annotation /// 0000421 // autophagic vacuole membrane // inferred from electronic annotation /// 0005794 // Golgi apparatus // inferred from electronic annotation /// 0016020 // membrane // inferred from electronic annotation /// 0016021 // integral to membrane // inferred from electronic annotation /// 0030173 // integral to Golgi membrane //…	0016787 // hydrolase activity // inferred from electronic annotation /// 0017110 // nucleoside-diphosphatase activity // inferred from electronic annotation /// 0045134 // uridine-diphosphatase activity // inferred from direct assay	---
2677388	ERC2	NM_015576 // ERC2 // ELKS/RAB6-interacting/CAST family member 2 // 3p14.3 // 260	GGACAATGC	0.64936	chr3:55542338-56468588 (-) // 98.48 // p14.3	0.572494	-0.804668	-1.74674	AA down vs CA	---	0005737 // cytoplasm // inferred from electronic annotation /// 0005856 // cytoskeleton // inferred from electronic annotation /// 0019717 // synaptosome // inferred from electronic annotation /// 0030054 // cell junction // inferred from electronic annotation /// 0030426 // growth cone // inferred from sequence or structural similarity /// 0042734 // presynaptic membrane // inferred from sequenc…	0005515 // protein binding // inferred from physical interaction	Circadian_Exercise // GenMAPP
2677388	ERC2	NM_015576 // ERC2 // ELKS/RAB6-interacting/CAST family member 2 // 3p14.3 // 260	GCAGTGTCC	0.64936	chr3:55542338-56468588 (-) // 98.48 // p14.3	0.572494	-0.804668	-1.74674	AA down vs CA	---	0005737 // cytoplasm // inferred from electronic annotation /// 0005856 // cytoskeleton // inferred from electronic annotation /// 0019717 // synaptosome // inferred from electronic annotation /// 0030054 // cell junction // inferred from electronic annotation /// 0030426 // growth cone // inferred from sequence or structural similarity /// 0042734 // presynaptic membrane // inferred from sequenc…	0005515 // protein binding // inferred from physical interaction	Circadian_Exercise // GenMAPP
2318257	ESPN	NM_031475 // ESPN // espin // 1p36.31 // 83715 /// NR_026567 // ESPNP // espin p	CGAGTGTCC	3.56324	chr1:6521210-6526255 (+) // 96.98 // p36.31	0.491551	-1.02459	-2.03438	AA down vs CA	0007605 // sensory perception of sound // inferred from electronic annotation /// 0007626 // locomotory behavior // inferred from electronic annotation /// 0030046 // parallel actin filament bundle assembly // inferred from electronic annotation /// 0051017 // actin filament bundle assembly // inferred from electronic annotation /// 0051494 // negative regulation of cytoskeleton organization // i…	0005737 // cytoplasm // inferred from electronic annotation /// 0005856 // cytoskeleton // inferred from electronic annotation /// 0005902 // microvillus // inferred from electronic annotation /// 0005903 // brush border // inferred from sequence or structural similarity /// 0015629 // actin cytoskeleton // inferred from electronic annotation /// 0031941 // filamentous actin // inferred from sequ…	0003779 // actin binding // inferred from electronic annotation /// 0017124 // SH3 domain binding // inferred from sequence or structural similarity /// 0051015 // actin filament binding // inferred from sequence or structural similarity	---
2938196	EXOC2	NM_018303 // EXOC2 // exocyst complex component 2 // 6p25.3 // 55770 /// ENST000	TGATTGTCC	2.26764	chr6:486111-619543 (-) // 99.78 // p25.3	1.80935	0.855472	1.80935	AA up vs CA	0006810 // transport // inferred from electronic annotation /// 0006887 // exocytosis // inferred from electronic annotation /// 0015031 // protein transport // inferred from electronic annotation	0000145 // exocyst // inferred from electronic annotation	0005515 // protein binding // inferred from physical interaction /// 0017160 // Ral GTPase binding // inferred from electronic annotation /// 0047485 // protein N-terminus binding // inferred from electronic annotation	---
2326237	EXTL1	NM_004455 // EXTL1 // exostoses (multiple)-like 1 // 1p36.1 // 2134 /// ENST0000	GCTCTGTCC	4.24108	chr1:26348270-26362932 (+) // 91.79 // p36.11	0.546751	-0.871044	-1.82899	AA down vs CA	0001501 // skeletal system development // traceable author statement	0005783 // endoplasmic reticulum // inferred from electronic annotation /// 0005789 // endoplasmic reticulum membrane // inferred from electronic annotation /// 0016020 // membrane // inferred from electronic annotation /// 0016021 // integral to membrane // inferred from electronic annotation /// 0031227 // intrinsic to endoplasmic reticulum membrane // inferred from electronic annotation	0005515 // protein binding // inferred from physical interaction /// 0016740 // transferase activity // inferred from electronic annotation /// 0016757 // transferase activity, transferring glycosyl groups // inferred from electronic annotation /// 0016758 // transferase activity, transferring hexosyl groups // inferred from electronic annotation /// 0050508 // glucuronosyl-N-acetylglucosaminyl-p…	---
3838624	FCGRT	NM_001136019 // FCGRT // Fc fragment of IgG, receptor, transporter, alpha // 19q	GGACAGACC	4.99562	chr19:50016537-50029588 (+) // 99.31 // q13.33	1.79542	0.844321	1.79542	AA up vs CA	0006955 // immune response // inferred from electronic annotation /// 0006955 // immune response // traceable author statement /// 0007565 // female pregnancy // traceable author statement /// 0019882 // antigen processing and presentation // inferred from electronic annotation	0005886 // plasma membrane // inferred from electronic annotation /// 0016020 // membrane // inferred from electronic annotation /// 0016021 // integral to membrane // inferred from electronic annotation /// 0042612 // MHC class I protein complex // inferred from electronic annotation	0004872 // receptor activity // inferred from electronic annotation /// 0004872 // receptor activity // traceable author statement /// 0019864 // IgG binding // inferred from electronic annotation /// 0030881 // beta-2-microglobulin binding // inferred from electronic annotation	---
2953777	FRS3	NM_006653 // FRS3 // fibroblast growth factor receptor substrate 3 // 6p21.1 //	GGGCTGTCC	4.99562	chr6:41737913-41745884 (-) // 95.47 // p21.1	0.58219	-0.780438	-1.71765	AA down vs CA	0007165 // signal transduction // traceable author statement /// 0008543 // fibroblast growth factor receptor signaling pathway // inferred from genetic interaction /// 0008543 // fibroblast growth factor receptor signaling pathway // traceable author statement	0005886 // plasma membrane // not recorded /// 0016020 // membrane // inferred from electronic annotation	0004872 // receptor activity // inferred from electronic annotation /// 0005104 // fibroblast growth factor receptor binding // inferred from physical interaction /// 0005158 // insulin receptor binding // inferred from electronic annotation	---
2953777	FRS3	NM_006653 // FRS3 // fibroblast growth factor receptor substrate 3 // 6p21.1 //	GCTTTGTCC	4.89044	chr6:41737913-41745884 (-) // 95.47 // p21.1	0.58219	-0.780438	-1.71765	AA down vs CA	0007165 // signal transduction // traceable author statement /// 0008543 // fibroblast growth factor receptor signaling pathway // inferred from genetic interaction /// 0008543 // fibroblast growth factor receptor signaling pathway // traceable author statement	0005886 // plasma membrane // not recorded /// 0016020 // membrane // inferred from electronic annotation	0004872 // receptor activity // inferred from electronic annotation /// 0005104 // fibroblast growth factor receptor binding // inferred from physical interaction /// 0005158 // insulin receptor binding // inferred from electronic annotation	---
3995254	GABRQ	NM_018558 // GABRQ // gamma-aminobutyric acid (GABA) receptor, theta // Xq28 //	CCAATGTCC	3.02515	chrX:151806636-151821825 (+) // 99.95 // q28	0.464542	-1.10612	-2.15266	AA down vs CA	0006810 // transport // inferred from electronic annotation /// 0006811 // ion transport // inferred from electronic annotation /// 0007165 // signal transduction // traceable author statement	0005886 // plasma membrane // inferred from electronic annotation /// 0005887 // integral to plasma membrane // traceable author statement /// 0016020 // membrane // inferred from electronic annotation /// 0016021 // integral to membrane // inferred from electronic annotation /// 0030054 // cell junction // inferred from electronic annotation /// 0034707 // chloride channel complex // inferred fr…	0004872 // receptor activity // inferred from electronic annotation /// 0004888 // transmembrane receptor activity // traceable author statement /// 0004890 // GABA-A receptor activity // inferred from electronic annotation /// 0005216 // ion channel activity // inferred from electronic annotation /// 0005230 // extracellular ligand-gated ion channel activity // inferred from electronic annotatio…	---
3995254	GABRQ	NM_018558 // GABRQ // gamma-aminobutyric acid (GABA) receptor, theta // Xq28 //	AAATTGTCC	3.38289	chrX:151806636-151821825 (+) // 99.95 // q28	0.464542	-1.10612	-2.15266	AA down vs CA	0006810 // transport // inferred from electronic annotation /// 0006811 // ion transport // inferred from electronic annotation /// 0007165 // signal transduction // traceable author statement	0005886 // plasma membrane // inferred from electronic annotation /// 0005887 // integral to plasma membrane // traceable author statement /// 0016020 // membrane // inferred from electronic annotation /// 0016021 // integral to membrane // inferred from electronic annotation /// 0030054 // cell junction // inferred from electronic annotation /// 0034707 // chloride channel complex // inferred fr…	0004872 // receptor activity // inferred from electronic annotation /// 0004888 // transmembrane receptor activity // traceable author statement /// 0004890 // GABA-A receptor activity // inferred from electronic annotation /// 0005216 // ion channel activity // inferred from electronic annotation /// 0005230 // extracellular ligand-gated ion channel activity // inferred from electronic annotatio…	---
2751936	GALNT7	NM_017423 // GALNT7 // UDP-N-acetyl-alpha-D-galactosamine:polypeptide N-acetylga	TTATTGTCC	2.51915	chr4:174089954-174245117 (+) // 99.34 // q34.1	1.90272	0.928063	1.90272	AA up vs CA	0005975 // carbohydrate metabolic process // traceable author statement /// 0006493 // protein O-linked glycosylation // inferred from electronic annotation /// 0006493 // protein O-linked glycosylation // traceable author statement	0000139 // Golgi membrane // inferred from electronic annotation /// 0005794 // Golgi apparatus // inferred from electronic annotation /// 0016020 // membrane // inferred from electronic annotation /// 0016021 // integral to membrane // inferred from electronic annotation	0004653 // polypeptide N-acetylgalactosaminyltransferase activity // inferred from electronic annotation /// 0004653 // polypeptide N-acetylgalactosaminyltransferase activity // traceable author statement /// 0005529 // sugar binding // inferred from electronic annotation /// 0016740 // transferase activity // inferred from electronic annotation /// 0016757 // transferase activity, transferring g…	---
3794641	GALR1	NM_001480 // GALR1 // galanin receptor 1 // 18q23 // 2587 /// ENST00000299727 //	GGACAGCCC	4.99562	chr18:74961732-74982093 (+) // 99.8 // q23	0.532051	-0.910364	-1.87952	AA down vs CA	0007165 // signal transduction // inferred from electronic annotation /// 0007186 // G-protein coupled receptor protein signaling pathway // inferred from electronic annotation /// 0007189 // activation of adenylate cyclase activity by G-protein signaling pathway // inferred from electronic annotation /// 0007194 // negative regulation of adenylate cyclase activity // traceable author statement /…	0005886 // plasma membrane // not recorded /// 0005886 // plasma membrane // inferred from electronic annotation /// 0005886 // plasma membrane // traceable author statement /// 0016020 // membrane // inferred from electronic annotation /// 0016021 // integral to membrane // inferred from electronic annotation /// 0016021 // integral to membrane // traceable author statement	0004871 // signal transducer activity // inferred from electronic annotation /// 0004872 // receptor activity // inferred from electronic annotation /// 0004930 // G-protein coupled receptor activity // inferred from electronic annotation /// 0004966 // galanin receptor activity // inferred from electronic annotation /// 0004966 // galanin receptor activity // traceable author statement /// 00429…	GPCRDB_Class_A_Rhodopsin-like // GenMAPP /// Peptide_GPCRs // GenMAPP
3086100	GATA4	NM_002052 // GATA4 // GATA binding protein 4 // 8p23.1-p22 // 2626 /// ENST00000	AAACTGTCC	2.73353	chr8:11565537-11617509 (+) // 97.7 // p23.1	0.517957	-0.949096	-1.93066	AA down vs CA	0001701 // in utero embryonic development // inferred from electronic annotation /// 0001702 // gastrulation with mouth forming second // inferred from electronic annotation /// 0001947 // heart looping // inferred from sequence or structural similarity /// 0003197 // endocardial cushion development // inferred from sequence or structural similarity /// 0003215 // cardiac right ventricle morphoge…	0005634 // nucleus // inferred from direct assay /// 0005634 // nucleus // inferred from sequence or structural similarity /// 0005634 // nucleus // non-traceable author statement /// 0005634 // nucleus // inferred from electronic annotation	0003677 // DNA binding // inferred from sequence or structural similarity /// 0003677 // DNA binding // inferred from electronic annotation /// 0003700 // sequence-specific DNA binding transcription factor activity // inferred from direct assay /// 0003700 // sequence-specific DNA binding transcription factor activity // inferred from electronic annotation /// 0003700 // sequence-specific DNA bin…	---
3137875	GGH	NM_003878 // GGH // gamma-glutamyl hydrolase (conjugase, folylpolygammaglutamyl	GGACATTCA	2.48409	chr8:63927640-63951386 (-) // 98.67 // q12.3	0.509768	-0.972087	-1.96168	AA down vs CA	0006541 // glutamine metabolic process // inferred from electronic annotation /// 0010043 // response to zinc ion // inferred from electronic annotation /// 0032868 // response to insulin stimulus // inferred from electronic annotation /// 0042493 // response to drug // inferred from electronic annotation /// 0045471 // response to ethanol // inferred from electronic annotation	0005576 // extracellular region // inferred from electronic annotation /// 0005615 // extracellular space // inferred from electronic annotation /// 0005764 // lysosome // inferred from electronic annotation /// 0005829 // cytosol // inferred from electronic annotation /// 0042470 // melanosome // inferred from electronic annotation	0003824 // catalytic activity // inferred from electronic annotation /// 0008238 // exopeptidase activity // traceable author statement /// 0008242 // omega peptidase activity // traceable author statement /// 0008242 // omega peptidase activity // inferred from electronic annotation /// 0016787 // hydrolase activity // inferred from electronic annotation /// 0034722 // gamma-glutamyl-peptidase a…	---
3137875	GGH	NM_003878 // GGH // gamma-glutamyl hydrolase (conjugase, folylpolygammaglutamyl	AGACTGTCC	2.48201	chr8:63927640-63951386 (-) // 98.67 // q12.3	0.509768	-0.972087	-1.96168	AA down vs CA	0006541 // glutamine metabolic process // inferred from electronic annotation /// 0010043 // response to zinc ion // inferred from electronic annotation /// 0032868 // response to insulin stimulus // inferred from electronic annotation /// 0042493 // response to drug // inferred from electronic annotation /// 0045471 // response to ethanol // inferred from electronic annotation	0005576 // extracellular region // inferred from electronic annotation /// 0005615 // extracellular space // inferred from electronic annotation /// 0005764 // lysosome // inferred from electronic annotation /// 0005829 // cytosol // inferred from electronic annotation /// 0042470 // melanosome // inferred from electronic annotation	0003824 // catalytic activity // inferred from electronic annotation /// 0008238 // exopeptidase activity // traceable author statement /// 0008242 // omega peptidase activity // traceable author statement /// 0008242 // omega peptidase activity // inferred from electronic annotation /// 0016787 // hydrolase activity // inferred from electronic annotation /// 0034722 // gamma-glutamyl-peptidase a…	---
3969633	GLRA2	NM_002063 // GLRA2 // glycine receptor, alpha 2 // Xp22.1-p21.3 // 2742 /// NM_0	GAACTGTCC	1.00606	chrX:14547795-14748718 (+) // 99.73 // p22.2	0.570156	-0.810571	-1.7539	AA down vs CA	0006810 // transport // inferred from electronic annotation /// 0006811 // ion transport // inferred from direct assay /// 0006811 // ion transport // inferred from electronic annotation /// 0006821 // chloride transport // inferred from electronic annotation /// 0007218 // neuropeptide signaling pathway // inferred from direct assay /// 0007416 // synapse assembly // inferred from electronic ann…	0005886 // plasma membrane // inferred from electronic annotation /// 0005887 // integral to plasma membrane // non-traceable author statement /// 0016020 // membrane // inferred from electronic annotation /// 0016021 // integral to membrane // inferred from electronic annotation /// 0030054 // cell junction // inferred from electronic annotation /// 0034707 // chloride channel complex // inferre…	0004872 // receptor activity // inferred from electronic annotation /// 0005216 // ion channel activity // inferred from electronic annotation /// 0005230 // extracellular ligand-gated ion channel activity // inferred from electronic annotation /// 0005254 // chloride channel activity // inferred from electronic annotation /// 0016594 // glycine binding // inferred from direct assay /// 0016934 /…	---
3989259	GLUD2	NM_012084 // GLUD2 // glutamate dehydrogenase 2 // Xq24-q25 // 2747 /// NM_00527	CCATTGTCC	2.8087	chrX:120182418-120183932 (+) // 98.57 // q24 /// chr10:88810776-88822453 (-) // 95.51 // q23.2	1.81481	0.859819	1.81481	AA up vs CA	0006520 // cellular amino acid metabolic process // inferred from electronic annotation /// 0006536 // glutamate metabolic process // inferred from direct assay /// 0006537 // glutamate biosynthetic process // inferred from direct assay /// 0008152 // metabolic process // inferred from electronic annotation /// 0019459 // glutamate deamidation // inferred from direct assay /// 0055114 // oxidatio…	0005737 // cytoplasm // inferred from direct assay /// 0005739 // mitochondrion // inferred from direct assay /// 0005739 // mitochondrion // inferred from electronic annotation /// 0005759 // mitochondrial matrix // inferred from electronic annotation	0003824 // catalytic activity // inferred from electronic annotation /// 0004352 // glutamate dehydrogenase activity // inferred from direct assay /// 0004353 // glutamate dehydrogenase [NAD(P)+] activity // inferred from direct assay /// 0004353 // glutamate dehydrogenase [NAD(P)+] activity // inferred from electronic annotation /// 0005488 // binding // inferred from electronic annotation /// 0…	---
3989259	GLUD2	NM_012084 // GLUD2 // glutamate dehydrogenase 2 // Xq24-q25 // 2747 /// NM_00527	CCATTGTCC	2.8087	chrX:120181538-120183215 (+) // 100.0 // q24 /// chr10:88811507-88854526 (-) // 97.5 // q23.2	1.81481	0.859819	1.81481	AA up vs CA	0006520 // cellular amino acid metabolic process // inferred from electronic annotation /// 0006536 // glutamate metabolic process // inferred from direct assay /// 0006537 // glutamate biosynthetic process // inferred from direct assay /// 0008152 // metabolic process // inferred from electronic annotation /// 0019459 // glutamate deamidation // inferred from direct assay /// 0055114 // oxidatio…	0005737 // cytoplasm // inferred from direct assay /// 0005739 // mitochondrion // inferred from direct assay /// 0005739 // mitochondrion // inferred from electronic annotation /// 0005759 // mitochondrial matrix // inferred from electronic annotation	0003824 // catalytic activity // inferred from electronic annotation /// 0004352 // glutamate dehydrogenase activity // inferred from direct assay /// 0004353 // glutamate dehydrogenase [NAD(P)+] activity // inferred from direct assay /// 0004353 // glutamate dehydrogenase [NAD(P)+] activity // inferred from electronic annotation /// 0005488 // binding // inferred from electronic annotation /// 0…	---
2622590	GNAT1	NM_144499 // GNAT1 // guanine nucleotide binding protein (G protein), alpha tran	CCATTGTCC	2.8087	chr3:50229052-50233949 (+) // 97.68 // p21.31	0.532338	-0.909586	-1.8785	AA down vs CA	0007165 // signal transduction // non-traceable author statement /// 0007165 // signal transduction // inferred from electronic annotation /// 0007186 // G-protein coupled receptor protein signaling pathway // inferred from electronic annotation /// 0007601 // visual perception // traceable author statement /// 0007601 // visual perception // inferred from electronic annotation /// 0007602 // pho…	0001750 // photoreceptor outer segment // inferred from direct assay /// 0001750 // photoreceptor outer segment // inferred from electronic annotation /// 0001917 // photoreceptor inner segment // inferred from direct assay /// 0005886 // plasma membrane // not recorded /// 0016020 // membrane // non-traceable author statement /// 0032391 // photoreceptor connecting cilium // inferred from electr…	0000035 // acyl binding // inferred from sequence or structural similarity /// 0000166 // nucleotide binding // inferred from electronic annotation /// 0003924 // GTPase activity // non-traceable author statement /// 0004871 // signal transducer activity // inferred from electronic annotation /// 0005515 // protein binding // inferred from electronic annotation /// 0005525 // GTP binding // not r…	---
2622590	GNAT1	NM_144499 // GNAT1 // guanine nucleotide binding protein (G protein), alpha tran	CCATTGTCC	2.8087	chr3:50229035-50233948 (+) // 94.96 // p21.31	0.532338	-0.909586	-1.8785	AA down vs CA	0007165 // signal transduction // non-traceable author statement /// 0007165 // signal transduction // inferred from electronic annotation /// 0007186 // G-protein coupled receptor protein signaling pathway // inferred from electronic annotation /// 0007601 // visual perception // traceable author statement /// 0007601 // visual perception // inferred from electronic annotation /// 0007602 // pho…	0001750 // photoreceptor outer segment // inferred from direct assay /// 0001750 // photoreceptor outer segment // inferred from electronic annotation /// 0001917 // photoreceptor inner segment // inferred from direct assay /// 0005886 // plasma membrane // not recorded /// 0016020 // membrane // non-traceable author statement /// 0032391 // photoreceptor connecting cilium // inferred from electr…	0000035 // acyl binding // inferred from sequence or structural similarity /// 0000166 // nucleotide binding // inferred from electronic annotation /// 0003924 // GTPase activity // non-traceable author statement /// 0004871 // signal transducer activity // inferred from electronic annotation /// 0005515 // protein binding // inferred from electronic annotation /// 0005525 // GTP binding // not r…	---
2624074	GNL3	NM_206825 // GNL3 // guanine nucleotide binding protein-like 3 (nucleolar) // 3p	GGACAATTA	2.51915	chr3:52719935-52728508 (+) // 98.69 // p21.1	2.10224	1.07193	2.10224	AA up vs CA	0008283 // cell proliferation // inferred from electronic annotation /// 0042127 // regulation of cell proliferation // inferred from sequence or structural similarity /// 0042127 // regulation of cell proliferation // inferred from electronic annotation	0005622 // intracellular // inferred from electronic annotation /// 0005634 // nucleus // inferred from sequence or structural similarity /// 0005634 // nucleus // inferred from electronic annotation /// 0005654 // nucleoplasm // inferred from electronic annotation /// 0005730 // nucleolus // inferred from sequence or structural similarity /// 0005730 // nucleolus // inferred from electronic anno…	0000166 // nucleotide binding // inferred from electronic annotation /// 0005515 // protein binding // inferred from physical interaction /// 0005515 // protein binding // inferred from electronic annotation /// 0005525 // GTP binding // inferred from sequence or structural similarity /// 0005525 // GTP binding // inferred from electronic annotation	---
2624074	GNL3	NM_206825 // GNL3 // guanine nucleotide binding protein-like 3 (nucleolar) // 3p	GGACACTAC	1.65542	chr3:52719935-52728508 (+) // 98.69 // p21.1	2.10224	1.07193	2.10224	AA up vs CA	0008283 // cell proliferation // inferred from electronic annotation /// 0042127 // regulation of cell proliferation // inferred from sequence or structural similarity /// 0042127 // regulation of cell proliferation // inferred from electronic annotation	0005622 // intracellular // inferred from electronic annotation /// 0005634 // nucleus // inferred from sequence or structural similarity /// 0005634 // nucleus // inferred from electronic annotation /// 0005654 // nucleoplasm // inferred from electronic annotation /// 0005730 // nucleolus // inferred from sequence or structural similarity /// 0005730 // nucleolus // inferred from electronic anno…	0000166 // nucleotide binding // inferred from electronic annotation /// 0005515 // protein binding // inferred from physical interaction /// 0005515 // protein binding // inferred from electronic annotation /// 0005525 // GTP binding // inferred from sequence or structural similarity /// 0005525 // GTP binding // inferred from electronic annotation	---
3566910	GPR135	NM_022571 // GPR135 // G protein-coupled receptor 135 // 14q23.1 // 64582 /// EN	GGACATTGG	3.02515	chr14:59930509-59931996 (-) // 91.02 // q23.1	0.574858	-0.798722	-1.73956	AA down vs CA	0007165 // signal transduction // inferred from electronic annotation /// 0007186 // G-protein coupled receptor protein signaling pathway // inferred from electronic annotation	0005886 // plasma membrane // inferred from electronic annotation /// 0016020 // membrane // traceable author statement /// 0016020 // membrane // inferred from electronic annotation /// 0016021 // integral to membrane // inferred from electronic annotation	0004871 // signal transducer activity // inferred from electronic annotation /// 0004872 // receptor activity // inferred from electronic annotation /// 0004930 // G-protein coupled receptor activity // inferred from electronic annotation /// 0004992 // platelet activating factor receptor activity // traceable author statement	GPCRDB_Other // GenMAPP
3566910	GPR135	NM_022571 // GPR135 // G protein-coupled receptor 135 // 14q23.1 // 64582 /// EN	GGACATTGG	3.02515	chr14:59930781-59931908 (-) // 88.79 // q23.1	0.574858	-0.798722	-1.73956	AA down vs CA	0007165 // signal transduction // inferred from electronic annotation /// 0007186 // G-protein coupled receptor protein signaling pathway // inferred from electronic annotation	0005886 // plasma membrane // inferred from electronic annotation /// 0016020 // membrane // traceable author statement /// 0016020 // membrane // inferred from electronic annotation /// 0016021 // integral to membrane // inferred from electronic annotation	0004871 // signal transducer activity // inferred from electronic annotation /// 0004872 // receptor activity // inferred from electronic annotation /// 0004930 // G-protein coupled receptor activity // inferred from electronic annotation /// 0004992 // platelet activating factor receptor activity // traceable author statement	GPCRDB_Other // GenMAPP
3566910	GPR135	NM_022571 // GPR135 // G protein-coupled receptor 135 // 14q23.1 // 64582 /// EN	GGACATTGG	3.02515	chr14:59930237-59930611 (-) // 99.73 // q23.1	0.574858	-0.798722	-1.73956	AA down vs CA	0007165 // signal transduction // inferred from electronic annotation /// 0007186 // G-protein coupled receptor protein signaling pathway // inferred from electronic annotation	0005886 // plasma membrane // inferred from electronic annotation /// 0016020 // membrane // traceable author statement /// 0016020 // membrane // inferred from electronic annotation /// 0016021 // integral to membrane // inferred from electronic annotation	0004871 // signal transducer activity // inferred from electronic annotation /// 0004872 // receptor activity // inferred from electronic annotation /// 0004930 // G-protein coupled receptor activity // inferred from electronic annotation /// 0004992 // platelet activating factor receptor activity // traceable author statement	GPCRDB_Other // GenMAPP
2843163	GRK6	NM_001004106 // GRK6 // G protein-coupled receptor kinase 6 // 5q35 // 2870 ///	GGACAAAGC	4.89044	chr5:176853698-176869850 (+) // 96.5 // q35.3	2.08964	1.06325	2.08964	AA up vs CA	0006468 // protein phosphorylation // inferred from electronic annotation /// 0007165 // signal transduction // inferred from electronic annotation /// 0008277 // regulation of G-protein coupled receptor protein signaling pathway // traceable author statement	0016020 // membrane // inferred from electronic annotation	0000166 // nucleotide binding // inferred from electronic annotation /// 0004672 // protein kinase activity // inferred from electronic annotation /// 0004674 // protein serine/threonine kinase activity // inferred from electronic annotation /// 0004703 // G-protein coupled receptor kinase activity // inferred from electronic annotation /// 0004871 // signal transducer activity // inferred from e…	Calcium_regulation_in_cardiac_cells // GenMAPP /// Smooth_muscle_contraction // GenMAPP
2843163	GRK6	NM_001004106 // GRK6 // G protein-coupled receptor kinase 6 // 5q35 // 2870 ///	GGACAAAGC	4.89044	chr5:176853782-176869850 (+) // 98.21 // q35.3	2.08964	1.06325	2.08964	AA up vs CA	0006468 // protein phosphorylation // inferred from electronic annotation /// 0007165 // signal transduction // inferred from electronic annotation /// 0008277 // regulation of G-protein coupled receptor protein signaling pathway // traceable author statement	0016020 // membrane // inferred from electronic annotation	0000166 // nucleotide binding // inferred from electronic annotation /// 0004672 // protein kinase activity // inferred from electronic annotation /// 0004674 // protein serine/threonine kinase activity // inferred from electronic annotation /// 0004703 // G-protein coupled receptor kinase activity // inferred from electronic annotation /// 0004871 // signal transducer activity // inferred from e…	Calcium_regulation_in_cardiac_cells // GenMAPP /// Smooth_muscle_contraction // GenMAPP
2843163	GRK6	NM_001004106 // GRK6 // G protein-coupled receptor kinase 6 // 5q35 // 2870 ///	GGACAAAGC	4.89044	chr5:176853843-176869624 (+) // 97.49 // q35.3	2.08964	1.06325	2.08964	AA up vs CA	0006468 // protein phosphorylation // inferred from electronic annotation /// 0007165 // signal transduction // inferred from electronic annotation /// 0008277 // regulation of G-protein coupled receptor protein signaling pathway // traceable author statement	0016020 // membrane // inferred from electronic annotation	0000166 // nucleotide binding // inferred from electronic annotation /// 0004672 // protein kinase activity // inferred from electronic annotation /// 0004674 // protein serine/threonine kinase activity // inferred from electronic annotation /// 0004703 // G-protein coupled receptor kinase activity // inferred from electronic annotation /// 0004871 // signal transducer activity // inferred from e…	Calcium_regulation_in_cardiac_cells // GenMAPP /// Smooth_muscle_contraction // GenMAPP
2843163	GRK6	NM_001004106 // GRK6 // G protein-coupled receptor kinase 6 // 5q35 // 2870 ///	GGACAAAGC	4.89044	chr5:176853843-176868354 (+) // 100.0 // q35.3	2.08964	1.06325	2.08964	AA up vs CA	0006468 // protein phosphorylation // inferred from electronic annotation /// 0007165 // signal transduction // inferred from electronic annotation /// 0008277 // regulation of G-protein coupled receptor protein signaling pathway // traceable author statement	0016020 // membrane // inferred from electronic annotation	0000166 // nucleotide binding // inferred from electronic annotation /// 0004672 // protein kinase activity // inferred from electronic annotation /// 0004674 // protein serine/threonine kinase activity // inferred from electronic annotation /// 0004703 // G-protein coupled receptor kinase activity // inferred from electronic annotation /// 0004871 // signal transducer activity // inferred from e…	Calcium_regulation_in_cardiac_cells // GenMAPP /// Smooth_muscle_contraction // GenMAPP
2623308	GRM2	NM_000839 // GRM2 // glutamate receptor, metabotropic 2 // 3p21.2 // 2912 /// NM	GGAGTGTCC	1.4039	chr3:51742997-51752128 (+) // 99.58 // p21.2	0.481901	-1.05319	-2.07512	AA down vs CA	0007165 // signal transduction // inferred from electronic annotation /// 0007186 // G-protein coupled receptor protein signaling pathway // inferred from electronic annotation /// 0007194 // negative regulation of adenylate cyclase activity // traceable author statement /// 0007268 // synaptic transmission // traceable author statement /// 0014047 // glutamate secretion // inferred from electron…	0005622 // intracellular // inferred from electronic annotation /// 0005886 // plasma membrane // inferred from electronic annotation /// 0005887 // integral to plasma membrane // traceable author statement /// 0016020 // membrane // inferred from electronic annotation /// 0016021 // integral to membrane // inferred from electronic annotation /// 0030424 // axon // inferred from electronic annota…	0001641 // group II metabotropic glutamate receptor activity // inferred from electronic annotation /// 0004871 // signal transducer activity // inferred from electronic annotation /// 0004872 // receptor activity // inferred from electronic annotation /// 0004930 // G-protein coupled receptor activity // traceable author statement /// 0004930 // G-protein coupled receptor activity // inferred fr…	GPCRDB_Class_C_Metabotropic_glutamate_pheromone // GenMAPP
3011180	GRM3	NM_000840 // GRM3 // glutamate receptor, metabotropic 3 // 7q21.1-q21.2 // 2913	GGGCTGTCC	4.99562	chr7:86274076-86494189 (+) // 98.48 // q21.11	0.556314	-0.846029	-1.79755	AA down vs CA	0007165 // signal transduction // inferred from electronic annotation /// 0007186 // G-protein coupled receptor protein signaling pathway // inferred from electronic annotation /// 0007194 // negative regulation of adenylate cyclase activity // traceable author statement /// 0007268 // synaptic transmission // traceable author statement /// 0050804 // regulation of synaptic transmission // inferr…	0005886 // plasma membrane // inferred from electronic annotation /// 0005887 // integral to plasma membrane // traceable author statement /// 0014069 // postsynaptic density // inferred from electronic annotation /// 0016020 // membrane // inferred from electronic annotation /// 0016021 // integral to membrane // inferred from electronic annotation /// 0030424 // axon // inferred from electronic…	0001641 // group II metabotropic glutamate receptor activity // inferred from electronic annotation /// 0004871 // signal transducer activity // inferred from electronic annotation /// 0004872 // receptor activity // inferred from electronic annotation /// 0004930 // G-protein coupled receptor activity // traceable author statement /// 0004930 // G-protein coupled receptor activity // inferred fr…	GPCRDB_Class_C_Metabotropic_glutamate_pheromone // GenMAPP
2876479	H2AFY	NM_004893 // H2AFY // H2A histone family, member Y // 5q31.1 // 9555 /// NM_1386	GGACATTGT	2.59328	chr5:134670072-134735577 (-) // 97.86 // q31.1	1.76203	0.817238	1.76203	AA up vs CA	0006334 // nucleosome assembly // non-traceable author statement /// 0006334 // nucleosome assembly // inferred from electronic annotation /// 0007549 // dosage compensation // inferred from direct assay /// 0016568 // chromatin modification // inferred from electronic annotation	0000786 // nucleosome // non-traceable author statement /// 0000786 // nucleosome // inferred from electronic annotation /// 0000793 // condensed chromosome // inferred from electronic annotation /// 0001740 // Barr body // inferred from direct assay /// 0005634 // nucleus // inferred from electronic annotation	0003677 // DNA binding // non-traceable author statement /// 0003677 // DNA binding // inferred from electronic annotation /// 0003682 // chromatin binding // inferred from electronic annotation	---
2876479	H2AFY	NM_004893 // H2AFY // H2A histone family, member Y // 5q31.1 // 9555 /// NM_1386	GGACATTGT	2.59328	chr5:134670617-134734881 (-) // 96.81 // q31.1	1.76203	0.817238	1.76203	AA up vs CA	0006334 // nucleosome assembly // non-traceable author statement /// 0006334 // nucleosome assembly // inferred from electronic annotation /// 0007549 // dosage compensation // inferred from direct assay /// 0016568 // chromatin modification // inferred from electronic annotation	0000786 // nucleosome // non-traceable author statement /// 0000786 // nucleosome // inferred from electronic annotation /// 0000793 // condensed chromosome // inferred from electronic annotation /// 0001740 // Barr body // inferred from direct assay /// 0005634 // nucleus // inferred from electronic annotation	0003677 // DNA binding // non-traceable author statement /// 0003677 // DNA binding // inferred from electronic annotation /// 0003682 // chromatin binding // inferred from electronic annotation	---
2876479	H2AFY	NM_004893 // H2AFY // H2A histone family, member Y // 5q31.1 // 9555 /// NM_1386	GGACATTGT	2.59328	chr5:134670617-134734881 (-) // 96.81 // q31.1	1.76203	0.817238	1.76203	AA up vs CA	0006334 // nucleosome assembly // non-traceable author statement /// 0006334 // nucleosome assembly // inferred from electronic annotation /// 0007549 // dosage compensation // inferred from direct assay /// 0016568 // chromatin modification // inferred from electronic annotation	0000786 // nucleosome // non-traceable author statement /// 0000786 // nucleosome // inferred from electronic annotation /// 0000793 // condensed chromosome // inferred from electronic annotation /// 0001740 // Barr body // inferred from direct assay /// 0005634 // nucleus // inferred from electronic annotation	0003677 // DNA binding // non-traceable author statement /// 0003677 // DNA binding // inferred from electronic annotation /// 0003682 // chromatin binding // inferred from electronic annotation	---
2738723	HADH	NM_001184705 // HADH // hydroxyacyl-CoA dehydrogenase // 4q22-q26 // 3033 /// NM	TCACTGTCC	0.86373	chr4:108911061-108955646 (+) // 97.27 // q25	1.81431	0.859421	1.81431	AA up vs CA	0006629 // lipid metabolic process // inferred from electronic annotation /// 0006631 // fatty acid metabolic process // inferred from electronic annotation /// 0008152 // metabolic process // inferred from electronic annotation /// 0055114 // oxidation reduction // inferred from electronic annotation	0005737 // cytoplasm // inferred from direct assay /// 0005739 // mitochondrion // inferred from electronic annotation /// 0005739 // mitochondrion // traceable author statement /// 0005759 // mitochondrial matrix // not recorded /// 0005759 // mitochondrial matrix // inferred from electronic annotation /// 0016020 // membrane // inferred from electronic annotation /// 0016021 // integral to memb…	0003824 // catalytic activity // inferred from electronic annotation /// 0003857 // 3-hydroxyacyl-CoA dehydrogenase activity // not recorded /// 0003857 // 3-hydroxyacyl-CoA dehydrogenase activity // inferred from electronic annotation /// 0003857 // 3-hydroxyacyl-CoA dehydrogenase activity // traceable author statement /// 0005488 // binding // inferred from electronic annotation /// 0016491 // …	Fatty_Acid_Degradation // GenMAPP /// Fatty_Acid_Synthesis // GenMAPP /// Mitochondrial_fatty_acid_betaoxidation // GenMAPP
2738723	HADH	NM_001184705 // HADH // hydroxyacyl-CoA dehydrogenase // 4q22-q26 // 3033 /// NM	TCACTGTCC	0.86373	chr4:108911001-108956323 (+) // 98.03 // q25	1.81431	0.859421	1.81431	AA up vs CA	0006629 // lipid metabolic process // inferred from electronic annotation /// 0006631 // fatty acid metabolic process // inferred from electronic annotation /// 0008152 // metabolic process // inferred from electronic annotation /// 0055114 // oxidation reduction // inferred from electronic annotation	0005737 // cytoplasm // inferred from direct assay /// 0005739 // mitochondrion // inferred from electronic annotation /// 0005739 // mitochondrion // traceable author statement /// 0005759 // mitochondrial matrix // not recorded /// 0005759 // mitochondrial matrix // inferred from electronic annotation	0003824 // catalytic activity // inferred from electronic annotation /// 0003857 // 3-hydroxyacyl-CoA dehydrogenase activity // not recorded /// 0003857 // 3-hydroxyacyl-CoA dehydrogenase activity // inferred from electronic annotation /// 0003857 // 3-hydroxyacyl-CoA dehydrogenase activity // traceable author statement /// 0005488 // binding // inferred from electronic annotation /// 0016491 // …	Fatty_Acid_Degradation // GenMAPP /// Fatty_Acid_Synthesis // GenMAPP /// Mitochondrial_fatty_acid_betaoxidation // GenMAPP
2738723	HADH	NM_001184705 // HADH // hydroxyacyl-CoA dehydrogenase // 4q22-q26 // 3033 /// NM	TCACTGTCC	0.86373	chr4:108910869-108956017 (+) // 99.88 // q25	1.81431	0.859421	1.81431	AA up vs CA	0006629 // lipid metabolic process // inferred from electronic annotation /// 0006631 // fatty acid metabolic process // inferred from electronic annotation /// 0008152 // metabolic process // inferred from electronic annotation /// 0055114 // oxidation reduction // inferred from electronic annotation	0005737 // cytoplasm // inferred from direct assay /// 0005739 // mitochondrion // inferred from electronic annotation /// 0005739 // mitochondrion // traceable author statement /// 0005759 // mitochondrial matrix // not recorded /// 0005759 // mitochondrial matrix // inferred from electronic annotation	0003824 // catalytic activity // inferred from electronic annotation /// 0003857 // 3-hydroxyacyl-CoA dehydrogenase activity // not recorded /// 0003857 // 3-hydroxyacyl-CoA dehydrogenase activity // inferred from electronic annotation /// 0003857 // 3-hydroxyacyl-CoA dehydrogenase activity // traceable author statement /// 0005488 // binding // inferred from electronic annotation /// 0016491 // …	Fatty_Acid_Degradation // GenMAPP /// Fatty_Acid_Synthesis // GenMAPP /// Mitochondrial_fatty_acid_betaoxidation // GenMAPP
2545092	HADHA	NM_000182 // HADHA // hydroxyacyl-CoA dehydrogenase/3-ketoacyl-CoA thiolase/enoy	CTACTGTCC	3.16539	chr12:8786930-8790876 (+) // 91.26 // p13.31 /// chr2:26413503-26467507 (-) // 98.79 // p23.3	1.81815	0.862471	1.81815	AA up vs CA	0006629 // lipid metabolic process // inferred from electronic annotation /// 0006631 // fatty acid metabolic process // inferred from electronic annotation /// 0006635 // fatty acid beta-oxidation // inferred from electronic annotation /// 0008152 // metabolic process // inferred from electronic annotation /// 0042493 // response to drug // inferred from electronic annotation /// 0055114 // oxid…	0005739 // mitochondrion // inferred from direct assay /// 0005739 // mitochondrion // inferred from electronic annotation /// 0005743 // mitochondrial inner membrane // inferred from electronic annotation /// 0005759 // mitochondrial matrix // not recorded /// 0016507 // fatty acid beta-oxidation multienzyme complex // inferred from electronic annotation /// 0042645 // mitochondrial nucleoid // …	0000062 // acyl-CoA binding // inferred from electronic annotation /// 0003824 // catalytic activity // inferred from electronic annotation /// 0003857 // 3-hydroxyacyl-CoA dehydrogenase activity // inferred from electronic annotation /// 0003857 // 3-hydroxyacyl-CoA dehydrogenase activity // traceable author statement /// 0003985 // acetyl-CoA C-acetyltransferase activity // traceable author sta…	Fatty_Acid_Degradation // GenMAPP /// Mitochondrial_fatty_acid_betaoxidation // GenMAPP
2545092	HADHA	NM_000182 // HADHA // hydroxyacyl-CoA dehydrogenase/3-ketoacyl-CoA thiolase/enoy	TCACTGTCC	0.86373	chr12:8786930-8790876 (+) // 91.26 // p13.31 /// chr2:26413503-26467507 (-) // 98.79 // p23.3	1.81815	0.862471	1.81815	AA up vs CA	0006629 // lipid metabolic process // inferred from electronic annotation /// 0006631 // fatty acid metabolic process // inferred from electronic annotation /// 0006635 // fatty acid beta-oxidation // inferred from electronic annotation /// 0008152 // metabolic process // inferred from electronic annotation /// 0042493 // response to drug // inferred from electronic annotation /// 0055114 // oxid…	0005739 // mitochondrion // inferred from direct assay /// 0005739 // mitochondrion // inferred from electronic annotation /// 0005743 // mitochondrial inner membrane // inferred from electronic annotation /// 0005759 // mitochondrial matrix // not recorded /// 0016507 // fatty acid beta-oxidation multienzyme complex // inferred from electronic annotation /// 0042645 // mitochondrial nucleoid // …	0000062 // acyl-CoA binding // inferred from electronic annotation /// 0003824 // catalytic activity // inferred from electronic annotation /// 0003857 // 3-hydroxyacyl-CoA dehydrogenase activity // inferred from electronic annotation /// 0003857 // 3-hydroxyacyl-CoA dehydrogenase activity // traceable author statement /// 0003985 // acetyl-CoA C-acetyltransferase activity // traceable author sta…	Fatty_Acid_Degradation // GenMAPP /// Mitochondrial_fatty_acid_betaoxidation // GenMAPP
2545092	HADHA	NM_000182 // HADHA // hydroxyacyl-CoA dehydrogenase/3-ketoacyl-CoA thiolase/enoy	CTACTGTCC	3.16539	chr12:8786930-8790876 (+) // 91.26 // p13.31 /// chr2:26413503-26467507 (-) // 98.79 // p23.3	1.81815	0.862471	1.81815	AA up vs CA	0006629 // lipid metabolic process // inferred from electronic annotation /// 0006631 // fatty acid metabolic process // inferred from electronic annotation /// 0006635 // fatty acid beta-oxidation // inferred from electronic annotation /// 0008152 // metabolic process // inferred from electronic annotation /// 0042493 // response to drug // inferred from electronic annotation /// 0055114 // oxid…	0005739 // mitochondrion // inferred from direct assay /// 0005739 // mitochondrion // inferred from electronic annotation /// 0005743 // mitochondrial inner membrane // inferred from electronic annotation /// 0005759 // mitochondrial matrix // not recorded /// 0016507 // fatty acid beta-oxidation multienzyme complex // inferred from electronic annotation /// 0042645 // mitochondrial nucleoid // …	0000062 // acyl-CoA binding // inferred from electronic annotation /// 0003824 // catalytic activity // inferred from electronic annotation /// 0003857 // 3-hydroxyacyl-CoA dehydrogenase activity // inferred from electronic annotation /// 0003857 // 3-hydroxyacyl-CoA dehydrogenase activity // traceable author statement /// 0003985 // acetyl-CoA C-acetyltransferase activity // traceable author sta…	Fatty_Acid_Degradation // GenMAPP /// Mitochondrial_fatty_acid_betaoxidation // GenMAPP
2545092	HADHA	NM_000182 // HADHA // hydroxyacyl-CoA dehydrogenase/3-ketoacyl-CoA thiolase/enoy	TCACTGTCC	0.86373	chr12:8786930-8790876 (+) // 91.26 // p13.31 /// chr2:26413503-26467507 (-) // 98.79 // p23.3	1.81815	0.862471	1.81815	AA up vs CA	0006629 // lipid metabolic process // inferred from electronic annotation /// 0006631 // fatty acid metabolic process // inferred from electronic annotation /// 0006635 // fatty acid beta-oxidation // inferred from electronic annotation /// 0008152 // metabolic process // inferred from electronic annotation /// 0042493 // response to drug // inferred from electronic annotation /// 0055114 // oxid…	0005739 // mitochondrion // inferred from direct assay /// 0005739 // mitochondrion // inferred from electronic annotation /// 0005743 // mitochondrial inner membrane // inferred from electronic annotation /// 0005759 // mitochondrial matrix // not recorded /// 0016507 // fatty acid beta-oxidation multienzyme complex // inferred from electronic annotation /// 0042645 // mitochondrial nucleoid // …	0000062 // acyl-CoA binding // inferred from electronic annotation /// 0003824 // catalytic activity // inferred from electronic annotation /// 0003857 // 3-hydroxyacyl-CoA dehydrogenase activity // inferred from electronic annotation /// 0003857 // 3-hydroxyacyl-CoA dehydrogenase activity // traceable author statement /// 0003985 // acetyl-CoA C-acetyltransferase activity // traceable author sta…	Fatty_Acid_Degradation // GenMAPP /// Mitochondrial_fatty_acid_betaoxidation // GenMAPP
2545092	HADHA	NM_000182 // HADHA // hydroxyacyl-CoA dehydrogenase/3-ketoacyl-CoA thiolase/enoy	CTACTGTCC	3.16539	chr12:8786936-8790367 (+) // 94.09 // p13.31 /// chr2:26413964-26467490 (-) // 99.47 // p23.3 /// chr4:166325058-166327526 (-) // 91.63 // q32.3	1.81815	0.862471	1.81815	AA up vs CA	0006629 // lipid metabolic process // inferred from electronic annotation /// 0006631 // fatty acid metabolic process // inferred from electronic annotation /// 0006635 // fatty acid beta-oxidation // inferred from electronic annotation /// 0008152 // metabolic process // inferred from electronic annotation /// 0042493 // response to drug // inferred from electronic annotation /// 0055114 // oxid…	0005739 // mitochondrion // inferred from direct assay /// 0005739 // mitochondrion // inferred from electronic annotation /// 0005743 // mitochondrial inner membrane // inferred from electronic annotation /// 0005759 // mitochondrial matrix // not recorded /// 0016507 // fatty acid beta-oxidation multienzyme complex // inferred from electronic annotation /// 0042645 // mitochondrial nucleoid // …	0000062 // acyl-CoA binding // inferred from electronic annotation /// 0003824 // catalytic activity // inferred from electronic annotation /// 0003857 // 3-hydroxyacyl-CoA dehydrogenase activity // inferred from electronic annotation /// 0003857 // 3-hydroxyacyl-CoA dehydrogenase activity // traceable author statement /// 0003985 // acetyl-CoA C-acetyltransferase activity // traceable author sta…	Fatty_Acid_Degradation // GenMAPP /// Mitochondrial_fatty_acid_betaoxidation // GenMAPP
2545092	HADHA	NM_000182 // HADHA // hydroxyacyl-CoA dehydrogenase/3-ketoacyl-CoA thiolase/enoy	TCACTGTCC	0.86373	chr12:8786936-8790367 (+) // 94.09 // p13.31 /// chr2:26413964-26467490 (-) // 99.47 // p23.3 /// chr4:166325058-166327526 (-) // 91.63 // q32.3	1.81815	0.862471	1.81815	AA up vs CA	0006629 // lipid metabolic process // inferred from electronic annotation /// 0006631 // fatty acid metabolic process // inferred from electronic annotation /// 0006635 // fatty acid beta-oxidation // inferred from electronic annotation /// 0008152 // metabolic process // inferred from electronic annotation /// 0042493 // response to drug // inferred from electronic annotation /// 0055114 // oxid…	0005739 // mitochondrion // inferred from direct assay /// 0005739 // mitochondrion // inferred from electronic annotation /// 0005743 // mitochondrial inner membrane // inferred from electronic annotation /// 0005759 // mitochondrial matrix // not recorded /// 0016507 // fatty acid beta-oxidation multienzyme complex // inferred from electronic annotation /// 0042645 // mitochondrial nucleoid // …	0000062 // acyl-CoA binding // inferred from electronic annotation /// 0003824 // catalytic activity // inferred from electronic annotation /// 0003857 // 3-hydroxyacyl-CoA dehydrogenase activity // inferred from electronic annotation /// 0003857 // 3-hydroxyacyl-CoA dehydrogenase activity // traceable author statement /// 0003985 // acetyl-CoA C-acetyltransferase activity // traceable author sta…	Fatty_Acid_Degradation // GenMAPP /// Mitochondrial_fatty_acid_betaoxidation // GenMAPP
2438531	HDGF	NM_004494 // HDGF // hepatoma-derived growth factor // 1q21-q23 // 3068 /// NM_0	GGACACAGC	4.89044	chr1:156711901-156721536 (-) // 90.61 // q23.1	1.83836	0.878419	1.83836	AA up vs CA	0006350 // transcription // inferred from electronic annotation /// 0007165 // signal transduction // non-traceable author statement /// 0008283 // cell proliferation // traceable author statement /// 0045449 // regulation of transcription // inferred from electronic annotation	0005615 // extracellular space // inferred from direct assay /// 0005615 // extracellular space // traceable author statement /// 0005634 // nucleus // inferred from electronic annotation /// 0005737 // cytoplasm // inferred from electronic annotation /// 0005737 // cytoplasm // traceable author statement	0000166 // nucleotide binding // inferred from electronic annotation /// 0003677 // DNA binding // inferred from electronic annotation /// 0008083 // growth factor activity // inferred from electronic annotation /// 0008201 // heparin binding // inferred from electronic annotation /// 0008201 // heparin binding // traceable author statement	---
2438531	HDGF	NM_004494 // HDGF // hepatoma-derived growth factor // 1q21-q23 // 3068 /// NM_0	GGACACAGC	4.89044	chr1:156711901-156712429 (-) // 38.95 // q23.1	1.83836	0.878419	1.83836	AA up vs CA	0006350 // transcription // inferred from electronic annotation /// 0007165 // signal transduction // non-traceable author statement /// 0008283 // cell proliferation // traceable author statement /// 0045449 // regulation of transcription // inferred from electronic annotation	0005615 // extracellular space // inferred from direct assay /// 0005615 // extracellular space // traceable author statement /// 0005634 // nucleus // inferred from electronic annotation /// 0005737 // cytoplasm // inferred from electronic annotation /// 0005737 // cytoplasm // traceable author statement	0000166 // nucleotide binding // inferred from electronic annotation /// 0003677 // DNA binding // inferred from electronic annotation /// 0008083 // growth factor activity // inferred from electronic annotation /// 0008201 // heparin binding // inferred from electronic annotation /// 0008201 // heparin binding // traceable author statement	---
2899110	HFE	NM_000410 // HFE // hemochromatosis // 6p21.3 // 3077 /// NM_139006 // HFE // he	GGACACTGG	2.8087	chr6:26087657-26094584 (+) // 99.0 // p22.2	0.572291	-0.805179	-1.74736	AA down vs CA	0002474 // antigen processing and presentation of peptide antigen via MHC class I // inferred from electronic annotation /// 0006461 // protein complex assembly // traceable author statement /// 0006810 // transport // inferred from electronic annotation /// 0006811 // ion transport // inferred from electronic annotation /// 0006826 // iron ion transport // inferred from electronic annotation ///…	0005737 // cytoplasm // traceable author statement /// 0005769 // early endosome // inferred from direct assay /// 0005886 // plasma membrane // traceable author statement /// 0005887 // integral to plasma membrane // traceable author statement /// 0016020 // membrane // inferred from electronic annotation /// 0016021 // integral to membrane // inferred from electronic annotation /// 0031410 // c…	0005515 // protein binding // inferred from physical interaction	---
2899110	HFE	NM_000410 // HFE // hemochromatosis // 6p21.3 // 3077 /// NM_139006 // HFE // he	GGACACTGG	2.8087	chr6:26087447-26097056 (+) // 85.63 // p22.2	0.572291	-0.805179	-1.74736	AA down vs CA	0002474 // antigen processing and presentation of peptide antigen via MHC class I // inferred from electronic annotation /// 0006461 // protein complex assembly // traceable author statement /// 0006810 // transport // inferred from electronic annotation /// 0006811 // ion transport // inferred from electronic annotation /// 0006826 // iron ion transport // inferred from electronic annotation ///…	0005737 // cytoplasm // traceable author statement /// 0005769 // early endosome // inferred from direct assay /// 0005886 // plasma membrane // traceable author statement /// 0005887 // integral to plasma membrane // traceable author statement /// 0016020 // membrane // inferred from electronic annotation /// 0016021 // integral to membrane // inferred from electronic annotation /// 0031410 // c…	0005515 // protein binding // inferred from physical interaction	---
2899110	HFE	NM_000410 // HFE // hemochromatosis // 6p21.3 // 3077 /// NM_139006 // HFE // he	GGACACTGG	2.8087	chr6:26091323-26096817 (+) // 93.73 // p22.2	0.572291	-0.805179	-1.74736	AA down vs CA	0002474 // antigen processing and presentation of peptide antigen via MHC class I // inferred from electronic annotation /// 0006461 // protein complex assembly // traceable author statement /// 0006810 // transport // inferred from electronic annotation /// 0006811 // ion transport // inferred from electronic annotation /// 0006826 // iron ion transport // inferred from electronic annotation ///…	0005737 // cytoplasm // traceable author statement /// 0005769 // early endosome // inferred from direct assay /// 0005886 // plasma membrane // traceable author statement /// 0005887 // integral to plasma membrane // traceable author statement /// 0016020 // membrane // inferred from electronic annotation /// 0016021 // integral to membrane // inferred from electronic annotation /// 0031410 // c…	0005515 // protein binding // inferred from physical interaction	---
2899110	HFE	NM_000410 // HFE // hemochromatosis // 6p21.3 // 3077 /// NM_139006 // HFE // he	GGACACTGG	2.8087	chr6:26087625-26094485 (+) // 99.49 // p22.2	0.572291	-0.805179	-1.74736	AA down vs CA	0002474 // antigen processing and presentation of peptide antigen via MHC class I // inferred from electronic annotation /// 0006461 // protein complex assembly // traceable author statement /// 0006810 // transport // inferred from electronic annotation /// 0006811 // ion transport // inferred from electronic annotation /// 0006826 // iron ion transport // inferred from electronic annotation ///…	0005737 // cytoplasm // traceable author statement /// 0005769 // early endosome // inferred from direct assay /// 0005886 // plasma membrane // traceable author statement /// 0005887 // integral to plasma membrane // traceable author statement /// 0016020 // membrane // inferred from electronic annotation /// 0016021 // integral to membrane // inferred from electronic annotation /// 0031410 // c…	0005515 // protein binding // inferred from physical interaction	---
2899110	HFE	NM_000410 // HFE // hemochromatosis // 6p21.3 // 3077 /// NM_139006 // HFE // he	GGACACTGG	2.8087	chr6:26087624-26094485 (+) // 99.13 // p22.2	0.572291	-0.805179	-1.74736	AA down vs CA	0002474 // antigen processing and presentation of peptide antigen via MHC class I // inferred from electronic annotation /// 0006461 // protein complex assembly // traceable author statement /// 0006810 // transport // inferred from electronic annotation /// 0006811 // ion transport // inferred from electronic annotation /// 0006826 // iron ion transport // inferred from electronic annotation ///…	0005737 // cytoplasm // traceable author statement /// 0005769 // early endosome // inferred from direct assay /// 0005886 // plasma membrane // traceable author statement /// 0005887 // integral to plasma membrane // traceable author statement /// 0016020 // membrane // inferred from electronic annotation /// 0016021 // integral to membrane // inferred from electronic annotation /// 0031410 // c…	0005515 // protein binding // inferred from physical interaction	---
2899110	HFE	NM_000410 // HFE // hemochromatosis // 6p21.3 // 3077 /// NM_139006 // HFE // he	GGACACTGG	2.8087	chr6:26087545-26096817 (+) // 85.91 // p22.2	0.572291	-0.805179	-1.74736	AA down vs CA	0002474 // antigen processing and presentation of peptide antigen via MHC class I // inferred from electronic annotation /// 0006461 // protein complex assembly // traceable author statement /// 0006810 // transport // inferred from electronic annotation /// 0006811 // ion transport // inferred from electronic annotation /// 0006826 // iron ion transport // inferred from electronic annotation ///…	0005737 // cytoplasm // traceable author statement /// 0005769 // early endosome // inferred from direct assay /// 0005886 // plasma membrane // traceable author statement /// 0005887 // integral to plasma membrane // traceable author statement /// 0016020 // membrane // inferred from electronic annotation /// 0016021 // integral to membrane // inferred from electronic annotation /// 0031410 // c…	0005515 // protein binding // inferred from physical interaction	---
2899110	HFE	NM_000410 // HFE // hemochromatosis // 6p21.3 // 3077 /// NM_139006 // HFE // he	GGACACTGG	2.8087	chr6:26087662-26097056 (+) // 98.1 // p22.2	0.572291	-0.805179	-1.74736	AA down vs CA	0002474 // antigen processing and presentation of peptide antigen via MHC class I // inferred from electronic annotation /// 0006461 // protein complex assembly // traceable author statement /// 0006810 // transport // inferred from electronic annotation /// 0006811 // ion transport // inferred from electronic annotation /// 0006826 // iron ion transport // inferred from electronic annotation ///…	0005737 // cytoplasm // traceable author statement /// 0005769 // early endosome // inferred from direct assay /// 0005886 // plasma membrane // traceable author statement /// 0005887 // integral to plasma membrane // traceable author statement /// 0016020 // membrane // inferred from electronic annotation /// 0016021 // integral to membrane // inferred from electronic annotation /// 0031410 // c…	0005515 // protein binding // inferred from physical interaction	---
2899110	HFE	NM_000410 // HFE // hemochromatosis // 6p21.3 // 3077 /// NM_139006 // HFE // he	GGACACTGG	2.8087	chr6:26087545-26095445 (+) // 82.97 // p22.2	0.572291	-0.805179	-1.74736	AA down vs CA	0002474 // antigen processing and presentation of peptide antigen via MHC class I // inferred from electronic annotation /// 0006461 // protein complex assembly // traceable author statement /// 0006810 // transport // inferred from electronic annotation /// 0006811 // ion transport // inferred from electronic annotation /// 0006826 // iron ion transport // inferred from electronic annotation ///…	0005737 // cytoplasm // traceable author statement /// 0005769 // early endosome // inferred from direct assay /// 0005886 // plasma membrane // traceable author statement /// 0005887 // integral to plasma membrane // traceable author statement /// 0016020 // membrane // inferred from electronic annotation /// 0016021 // integral to membrane // inferred from electronic annotation /// 0031410 // c…	0005515 // protein binding // inferred from physical interaction	---
2899110	HFE	NM_000410 // HFE // hemochromatosis // 6p21.3 // 3077 /// NM_139006 // HFE // he	GGACACTGG	2.8087	chr6:26087545-26096818 (+) // 97.5 // p22.2	0.572291	-0.805179	-1.74736	AA down vs CA	0002474 // antigen processing and presentation of peptide antigen via MHC class I // inferred from electronic annotation /// 0006461 // protein complex assembly // traceable author statement /// 0006810 // transport // inferred from electronic annotation /// 0006811 // ion transport // inferred from electronic annotation /// 0006826 // iron ion transport // inferred from electronic annotation ///…	0005737 // cytoplasm // traceable author statement /// 0005769 // early endosome // inferred from direct assay /// 0005886 // plasma membrane // traceable author statement /// 0005887 // integral to plasma membrane // traceable author statement /// 0016020 // membrane // inferred from electronic annotation /// 0016021 // integral to membrane // inferred from electronic annotation /// 0031410 // c…	0005515 // protein binding // inferred from physical interaction	---
2899110	HFE	NM_000410 // HFE // hemochromatosis // 6p21.3 // 3077 /// NM_139006 // HFE // he	GGACACTGG	2.8087	chr6:26091321-26096817 (+) // 95.73 // p22.2	0.572291	-0.805179	-1.74736	AA down vs CA	0002474 // antigen processing and presentation of peptide antigen via MHC class I // inferred from electronic annotation /// 0006461 // protein complex assembly // traceable author statement /// 0006810 // transport // inferred from electronic annotation /// 0006811 // ion transport // inferred from electronic annotation /// 0006826 // iron ion transport // inferred from electronic annotation ///…	0005737 // cytoplasm // traceable author statement /// 0005769 // early endosome // inferred from direct assay /// 0005886 // plasma membrane // traceable author statement /// 0005887 // integral to plasma membrane // traceable author statement /// 0016020 // membrane // inferred from electronic annotation /// 0016021 // integral to membrane // inferred from electronic annotation /// 0031410 // c…	0005515 // protein binding // inferred from physical interaction	---
2899110	HFE	NM_000410 // HFE // hemochromatosis // 6p21.3 // 3077 /// NM_139006 // HFE // he	GGACACTGG	2.8087	chr6:26087632-26094458 (+) // 100.0 // p22.2	0.572291	-0.805179	-1.74736	AA down vs CA	0002474 // antigen processing and presentation of peptide antigen via MHC class I // inferred from electronic annotation /// 0006461 // protein complex assembly // traceable author statement /// 0006810 // transport // inferred from electronic annotation /// 0006811 // ion transport // inferred from electronic annotation /// 0006826 // iron ion transport // inferred from electronic annotation ///…	0005737 // cytoplasm // traceable author statement /// 0005769 // early endosome // inferred from direct assay /// 0005886 // plasma membrane // traceable author statement /// 0005887 // integral to plasma membrane // traceable author statement /// 0016020 // membrane // inferred from electronic annotation /// 0016021 // integral to membrane // inferred from electronic annotation /// 0031410 // c…	0005515 // protein binding // inferred from physical interaction	---
2899110	HFE	NM_000410 // HFE // hemochromatosis // 6p21.3 // 3077 /// NM_139006 // HFE // he	GGACACTGG	2.8087	chr6:26087632-26094458 (+) // 100.0 // p22.2	0.572291	-0.805179	-1.74736	AA down vs CA	0002474 // antigen processing and presentation of peptide antigen via MHC class I // inferred from electronic annotation /// 0006461 // protein complex assembly // traceable author statement /// 0006810 // transport // inferred from electronic annotation /// 0006811 // ion transport // inferred from electronic annotation /// 0006826 // iron ion transport // inferred from electronic annotation ///…	0005737 // cytoplasm // traceable author statement /// 0005769 // early endosome // inferred from direct assay /// 0005886 // plasma membrane // traceable author statement /// 0005887 // integral to plasma membrane // traceable author statement /// 0016020 // membrane // inferred from electronic annotation /// 0016021 // integral to membrane // inferred from electronic annotation /// 0031410 // c…	0005515 // protein binding // inferred from physical interaction	---
2899110	HFE	NM_000410 // HFE // hemochromatosis // 6p21.3 // 3077 /// NM_139006 // HFE // he	GGACACTGG	2.8087	chr6:26087632-26095058 (+) // 93.95 // p22.2	0.572291	-0.805179	-1.74736	AA down vs CA	0002474 // antigen processing and presentation of peptide antigen via MHC class I // inferred from electronic annotation /// 0006461 // protein complex assembly // traceable author statement /// 0006810 // transport // inferred from electronic annotation /// 0006811 // ion transport // inferred from electronic annotation /// 0006826 // iron ion transport // inferred from electronic annotation ///…	0005737 // cytoplasm // traceable author statement /// 0005769 // early endosome // inferred from direct assay /// 0005886 // plasma membrane // traceable author statement /// 0005887 // integral to plasma membrane // traceable author statement /// 0016020 // membrane // inferred from electronic annotation /// 0016021 // integral to membrane // inferred from electronic annotation /// 0031410 // c…	0005515 // protein binding // inferred from physical interaction	---
2899261	HIST1H2BI	NM_003525 // HIST1H2BI // histone cluster 1, H2bi // 6p21.3 // 8346 /// BC101653	GCCCTGTCC	4.94793	chr6:26273203-26273584 (+) // 100.0 // p22.2 /// chr6:26158397-26158778 (+) // 92.39 // p22.2 /// chr6:26199786-26200636 (+) // 91.86 // p22.2 /// chr6:26251878-26252259 (+) // 90.81 // p22.2 /// chr6:27775303-27775669 (-) // 90.55 // p22.1 /// chr6:26123	0.556903	-0.844502	-1.79565	AA down vs CA	0006334 // nucleosome assembly // inferred from electronic annotation /// 0006334 // nucleosome assembly // non-traceable author statement /// 0042742 // defense response to bacterium // inferred from electronic annotation	0000786 // nucleosome // inferred from electronic annotation /// 0000786 // nucleosome // non-traceable author statement /// 0005634 // nucleus // inferred from electronic annotation	0003677 // DNA binding // inferred from electronic annotation /// 0003677 // DNA binding // non-traceable author statement /// 0005515 // protein binding // inferred from physical interaction	---
2899261	HIST1H2BI	NM_003525 // HIST1H2BI // histone cluster 1, H2bi // 6p21.3 // 8346 /// BC101653	GGACACCGC	4.89044	chr6:26273203-26273584 (+) // 100.0 // p22.2 /// chr6:26158397-26158778 (+) // 92.39 // p22.2 /// chr6:26199786-26200636 (+) // 91.86 // p22.2 /// chr6:26251878-26252259 (+) // 90.81 // p22.2 /// chr6:27775303-27775669 (-) // 90.55 // p22.1 /// chr6:26123	0.556903	-0.844502	-1.79565	AA down vs CA	0006334 // nucleosome assembly // inferred from electronic annotation /// 0006334 // nucleosome assembly // non-traceable author statement /// 0042742 // defense response to bacterium // inferred from electronic annotation	0000786 // nucleosome // inferred from electronic annotation /// 0000786 // nucleosome // non-traceable author statement /// 0005634 // nucleus // inferred from electronic annotation	0003677 // DNA binding // inferred from electronic annotation /// 0003677 // DNA binding // non-traceable author statement /// 0005515 // protein binding // inferred from physical interaction	---
3250237	HKDC1	NM_025130 // HKDC1 // hexokinase domain containing 1 // 10q22.1 // 80201 /// ENS	GGACAATGT	2.37683	chr10:71000405-71027305 (+) // 98.31 // q22.1	0.552431	-0.856134	-1.81018	AA down vs CA	0005975 // carbohydrate metabolic process // inferred from electronic annotation /// 0006096 // glycolysis // inferred from electronic annotation	0005634 // nucleus // inferred from direct assay /// 0005730 // nucleolus // inferred from direct assay /// 0005739 // mitochondrion // inferred from direct assay	0000166 // nucleotide binding // inferred from electronic annotation /// 0004396 // hexokinase activity // inferred from electronic annotation /// 0005524 // ATP binding // inferred from electronic annotation /// 0016301 // kinase activity // inferred from electronic annotation /// 0016740 // transferase activity // inferred from electronic annotation /// 0016773 // phosphotransferase activity, a…	---
2948926	HLA-B	NM_005514 // HLA-B // major histocompatibility complex, class I, B // 6p21.3 //	CCAGTGTCC	2.8087	chr6:29795626-29913064 (+) // 91.18 // p22.1 /// chr6:31322066-31324935 (-) // 96.27 // p21.33 /// chr6:31237126-31239848 (-) // 90.55 // p21.33	1.75157	0.808649	1.75157	AA up vs CA	0002223 // stimulatory C-type lectin receptor signaling pathway // inferred from direct assay /// 0002418 // immune response to tumor cell // inferred from direct assay /// 0002474 // antigen processing and presentation of peptide antigen via MHC class I // inferred from electronic annotation /// 0006952 // defense response // traceable author statement /// 0006955 // immune response // inferred …	0005615 // extracellular space // inferred from direct assay /// 0005624 // membrane fraction // traceable author statement /// 0005737 // cytoplasm // inferred from electronic annotation /// 0005886 // plasma membrane // not recorded /// 0005886 // plasma membrane // inferred from electronic annotation /// 0005887 // integral to plasma membrane // non-traceable author statement /// 0005887 // in…	0005515 // protein binding // inferred from physical interaction /// 0030881 // beta-2-microglobulin binding // inferred from direct assay /// 0032393 // MHC class I receptor activity // non-traceable author statement /// 0046703 // natural killer cell lectin-like receptor binding // inferred from direct assay	Proteasome_Degradation // GenMAPP
2948926	HLA-B	NM_005514 // HLA-B // major histocompatibility complex, class I, B // 6p21.3 //	CCAGTGTCC	2.8087	chr6:29795626-29913064 (+) // 91.18 // p22.1 /// chr6:31322066-31324935 (-) // 96.27 // p21.33 /// chr6:31237126-31239848 (-) // 90.55 // p21.33	1.75157	0.808649	1.75157	AA up vs CA	0002223 // stimulatory C-type lectin receptor signaling pathway // inferred from direct assay /// 0002418 // immune response to tumor cell // inferred from direct assay /// 0002474 // antigen processing and presentation of peptide antigen via MHC class I // inferred from electronic annotation /// 0006952 // defense response // traceable author statement /// 0006955 // immune response // inferred …	0005615 // extracellular space // inferred from direct assay /// 0005624 // membrane fraction // traceable author statement /// 0005737 // cytoplasm // inferred from electronic annotation /// 0005886 // plasma membrane // not recorded /// 0005886 // plasma membrane // inferred from electronic annotation /// 0005887 // integral to plasma membrane // non-traceable author statement /// 0005887 // in…	0005515 // protein binding // inferred from physical interaction /// 0030881 // beta-2-microglobulin binding // inferred from direct assay /// 0032393 // MHC class I receptor activity // non-traceable author statement /// 0046703 // natural killer cell lectin-like receptor binding // inferred from direct assay	Proteasome_Degradation // GenMAPP
2948926	HLA-B	NM_005514 // HLA-B // major histocompatibility complex, class I, B // 6p21.3 //	CCAGTGTCC	2.8087	chr6:31321896-31325022 (-) // 96.54 // p21.33	1.75157	0.808649	1.75157	AA up vs CA	0002223 // stimulatory C-type lectin receptor signaling pathway // inferred from direct assay /// 0002418 // immune response to tumor cell // inferred from direct assay /// 0002474 // antigen processing and presentation of peptide antigen via MHC class I // inferred from electronic annotation /// 0006952 // defense response // traceable author statement /// 0006955 // immune response // inferred …	0005615 // extracellular space // inferred from direct assay /// 0005624 // membrane fraction // traceable author statement /// 0005737 // cytoplasm // inferred from electronic annotation /// 0005886 // plasma membrane // not recorded /// 0005886 // plasma membrane // inferred from electronic annotation /// 0005887 // integral to plasma membrane // non-traceable author statement /// 0005887 // in…	0005515 // protein binding // inferred from physical interaction /// 0030881 // beta-2-microglobulin binding // inferred from direct assay /// 0032393 // MHC class I receptor activity // non-traceable author statement /// 0046703 // natural killer cell lectin-like receptor binding // inferred from direct assay	Proteasome_Degradation // GenMAPP
2948926	HLA-B	NM_005514 // HLA-B // major histocompatibility complex, class I, B // 6p21.3 //	CCAGTGTCC	2.8087	chr6:31321896-31325022 (-) // 96.54 // p21.33	1.75157	0.808649	1.75157	AA up vs CA	0002223 // stimulatory C-type lectin receptor signaling pathway // inferred from direct assay /// 0002418 // immune response to tumor cell // inferred from direct assay /// 0002474 // antigen processing and presentation of peptide antigen via MHC class I // inferred from electronic annotation /// 0006952 // defense response // traceable author statement /// 0006955 // immune response // inferred …	0005615 // extracellular space // inferred from direct assay /// 0005624 // membrane fraction // traceable author statement /// 0005737 // cytoplasm // inferred from electronic annotation /// 0005886 // plasma membrane // not recorded /// 0005886 // plasma membrane // inferred from electronic annotation /// 0005887 // integral to plasma membrane // non-traceable author statement /// 0005887 // in…	0005515 // protein binding // inferred from physical interaction /// 0030881 // beta-2-microglobulin binding // inferred from direct assay /// 0032393 // MHC class I receptor activity // non-traceable author statement /// 0046703 // natural killer cell lectin-like receptor binding // inferred from direct assay	Proteasome_Degradation // GenMAPP
2948926	HLA-B	NM_005514 // HLA-B // major histocompatibility complex, class I, B // 6p21.3 //	CCAGTGTCC	2.8087	chr6:31322409-31324935 (-) // 95.62 // p21.33 /// chr6:31237269-31239848 (-) // 92.19 // p21.33	1.75157	0.808649	1.75157	AA up vs CA	0002223 // stimulatory C-type lectin receptor signaling pathway // inferred from direct assay /// 0002418 // immune response to tumor cell // inferred from direct assay /// 0002474 // antigen processing and presentation of peptide antigen via MHC class I // inferred from electronic annotation /// 0006952 // defense response // traceable author statement /// 0006955 // immune response // inferred …	0005615 // extracellular space // inferred from direct assay /// 0005624 // membrane fraction // traceable author statement /// 0005737 // cytoplasm // inferred from electronic annotation /// 0005886 // plasma membrane // not recorded /// 0005886 // plasma membrane // inferred from electronic annotation /// 0005887 // integral to plasma membrane // non-traceable author statement /// 0005887 // in…	0005515 // protein binding // inferred from physical interaction /// 0030881 // beta-2-microglobulin binding // inferred from direct assay /// 0032393 // MHC class I receptor activity // non-traceable author statement /// 0046703 // natural killer cell lectin-like receptor binding // inferred from direct assay	Proteasome_Degradation // GenMAPP
2948926	HLA-B	NM_005514 // HLA-B // major histocompatibility complex, class I, B // 6p21.3 //	CCAGTGTCC	2.8087	chr6:31322409-31324935 (-) // 95.62 // p21.33 /// chr6:31237269-31239848 (-) // 92.19 // p21.33	1.75157	0.808649	1.75157	AA up vs CA	0002223 // stimulatory C-type lectin receptor signaling pathway // inferred from direct assay /// 0002418 // immune response to tumor cell // inferred from direct assay /// 0002474 // antigen processing and presentation of peptide antigen via MHC class I // inferred from electronic annotation /// 0006952 // defense response // traceable author statement /// 0006955 // immune response // inferred …	0005615 // extracellular space // inferred from direct assay /// 0005624 // membrane fraction // traceable author statement /// 0005737 // cytoplasm // inferred from electronic annotation /// 0005886 // plasma membrane // not recorded /// 0005886 // plasma membrane // inferred from electronic annotation /// 0005887 // integral to plasma membrane // non-traceable author statement /// 0005887 // in…	0005515 // protein binding // inferred from physical interaction /// 0030881 // beta-2-microglobulin binding // inferred from direct assay /// 0032393 // MHC class I receptor activity // non-traceable author statement /// 0046703 // natural killer cell lectin-like receptor binding // inferred from direct assay	Proteasome_Degradation // GenMAPP
2901620	HLA-E	NM_005516 // HLA-E // major histocompatibility complex, class I, E // 6p21.3 //	GGACAGAGC	4.24108	chr6:30457288-30461970 (+) // 64.41 // p21.33	1.79005	0.84	1.79005	AA up vs CA	0002474 // antigen processing and presentation of peptide antigen via MHC class I // inferred from electronic annotation /// 0006955 // immune response // inferred from electronic annotation /// 0019882 // antigen processing and presentation // inferred from electronic annotation	0005886 // plasma membrane // not recorded /// 0016020 // membrane // inferred from electronic annotation /// 0016021 // integral to membrane // inferred from electronic annotation /// 0042612 // MHC class I protein complex // inferred from electronic annotation	0032393 // MHC class I receptor activity // traceable author statement	Proteasome_Degradation // GenMAPP
2901620	HLA-E	NM_005516 // HLA-E // major histocompatibility complex, class I, E // 6p21.3 //	GGACAGAGC	4.24108	chr6:30457288-30461970 (+) // 64.41 // p21.33	1.79005	0.84	1.79005	AA up vs CA	0002474 // antigen processing and presentation of peptide antigen via MHC class I // inferred from electronic annotation /// 0006955 // immune response // inferred from electronic annotation /// 0019882 // antigen processing and presentation // inferred from electronic annotation	0005886 // plasma membrane // not recorded /// 0016020 // membrane // inferred from electronic annotation /// 0016021 // integral to membrane // inferred from electronic annotation /// 0042612 // MHC class I protein complex // inferred from electronic annotation	0032393 // MHC class I receptor activity // traceable author statement	Proteasome_Degradation // GenMAPP
2901620	HLA-E	NM_005516 // HLA-E // major histocompatibility complex, class I, E // 6p21.3 //	GGACAGAGC	4.24108	chr6:30457302-30461055 (+) // 80.72 // p21.33	1.79005	0.84	1.79005	AA up vs CA	0002474 // antigen processing and presentation of peptide antigen via MHC class I // inferred from electronic annotation /// 0006955 // immune response // inferred from electronic annotation /// 0019882 // antigen processing and presentation // inferred from electronic annotation	0005886 // plasma membrane // not recorded /// 0016020 // membrane // inferred from electronic annotation /// 0016021 // integral to membrane // inferred from electronic annotation /// 0042612 // MHC class I protein complex // inferred from electronic annotation	0032393 // MHC class I receptor activity // traceable author statement	Proteasome_Degradation // GenMAPP
2901620	HLA-E	NM_005516 // HLA-E // major histocompatibility complex, class I, E // 6p21.3 //	GGACAGAGC	4.24108	chr6:30457302-30461055 (+) // 80.72 // p21.33	1.79005	0.84	1.79005	AA up vs CA	0002474 // antigen processing and presentation of peptide antigen via MHC class I // inferred from electronic annotation /// 0006955 // immune response // inferred from electronic annotation /// 0019882 // antigen processing and presentation // inferred from electronic annotation	0005886 // plasma membrane // not recorded /// 0016020 // membrane // inferred from electronic annotation /// 0016021 // integral to membrane // inferred from electronic annotation /// 0042612 // MHC class I protein complex // inferred from electronic annotation	0032393 // MHC class I receptor activity // traceable author statement	Proteasome_Degradation // GenMAPP
2901620	HLA-E	NM_005516 // HLA-E // major histocompatibility complex, class I, E // 6p21.3 //	GGACAGAGC	4.24108	chr6:30457336-30460991 (+) // 85.59 // p21.33	1.79005	0.84	1.79005	AA up vs CA	0002474 // antigen processing and presentation of peptide antigen via MHC class I // inferred from electronic annotation /// 0006955 // immune response // inferred from electronic annotation /// 0019882 // antigen processing and presentation // inferred from electronic annotation	0005886 // plasma membrane // not recorded /// 0016020 // membrane // inferred from electronic annotation /// 0016021 // integral to membrane // inferred from electronic annotation /// 0042612 // MHC class I protein complex // inferred from electronic annotation	0032393 // MHC class I receptor activity // traceable author statement	Proteasome_Degradation // GenMAPP
2901620	HLA-E	NM_005516 // HLA-E // major histocompatibility complex, class I, E // 6p21.3 //	GGACAGAGC	4.24108	chr6:30457336-30460991 (+) // 85.59 // p21.33	1.79005	0.84	1.79005	AA up vs CA	0002474 // antigen processing and presentation of peptide antigen via MHC class I // inferred from electronic annotation /// 0006955 // immune response // inferred from electronic annotation /// 0019882 // antigen processing and presentation // inferred from electronic annotation	0005886 // plasma membrane // not recorded /// 0016020 // membrane // inferred from electronic annotation /// 0016021 // integral to membrane // inferred from electronic annotation /// 0042612 // MHC class I protein complex // inferred from electronic annotation	0032393 // MHC class I receptor activity // traceable author statement	Proteasome_Degradation // GenMAPP
2401275	HNRNPR	NM_001102398 // HNRNPR // heterogeneous nuclear ribonucleoprotein R // 1p36.12 /	ATAGTGTCC	3.38289	chr1:23636015-23670801 (-) // 96.04 // p36.12	1.77853	0.830685	1.77853	AA up vs CA	0006397 // mRNA processing // inferred from electronic annotation /// 0006397 // mRNA processing // traceable author statement /// 0008380 // RNA splicing // not recorded /// 0008380 // RNA splicing // inferred from electronic annotation	0005634 // nucleus // inferred from electronic annotation /// 0005634 // nucleus // traceable author statement /// 0005654 // nucleoplasm // inferred from electronic annotation /// 0005681 // spliceosomal complex // inferred from electronic annotation /// 0005737 // cytoplasm // inferred from electronic annotation /// 0030529 // ribonucleoprotein complex // inferred from direct assay /// 0030529 …	0000166 // nucleotide binding // inferred from electronic annotation /// 0003676 // nucleic acid binding // inferred from electronic annotation /// 0003723 // RNA binding // inferred from electronic annotation /// 0003723 // RNA binding // traceable author statement /// 0005515 // protein binding // inferred from physical interaction	mRNA_processing_Reactome // GenMAPP
2401275	HNRNPR	NM_001102398 // HNRNPR // heterogeneous nuclear ribonucleoprotein R // 1p36.12 /	ATAGTGTCC	3.38289	chr1:23636276-23670803 (-) // 97.5 // p36.12	1.77853	0.830685	1.77853	AA up vs CA	0006397 // mRNA processing // inferred from electronic annotation /// 0006397 // mRNA processing // traceable author statement /// 0008380 // RNA splicing // not recorded /// 0008380 // RNA splicing // inferred from electronic annotation	0005634 // nucleus // inferred from electronic annotation /// 0005634 // nucleus // traceable author statement /// 0005654 // nucleoplasm // inferred from electronic annotation /// 0005681 // spliceosomal complex // inferred from electronic annotation /// 0005737 // cytoplasm // inferred from electronic annotation /// 0030529 // ribonucleoprotein complex // inferred from direct assay /// 0030529 …	0000166 // nucleotide binding // inferred from electronic annotation /// 0003676 // nucleic acid binding // inferred from electronic annotation /// 0003723 // RNA binding // inferred from electronic annotation /// 0003723 // RNA binding // traceable author statement /// 0005515 // protein binding // inferred from physical interaction	mRNA_processing_Reactome // GenMAPP
3042756	HOXA2	NM_006735 // HOXA2 // homeobox A2 // 7p15.2 // 3199 /// ENST00000222718 // HOXA2	GGACACTGG	2.8087	chr7:27139973-27142394 (-) // 94.97 // p15.2	0.498919	-1.00312	-2.00433	AA down vs CA	0000122 // negative regulation of transcription from RNA polymerase II promoter // inferred from electronic annotation /// 0001709 // cell fate determination // inferred from electronic annotation /// 0002076 // osteoblast development // inferred from electronic annotation /// 0006350 // transcription // inferred from electronic annotation /// 0006355 // regulation of transcription, DNA-dependent…	0005634 // nucleus // inferred from electronic annotation	0003677 // DNA binding // inferred from electronic annotation /// 0003700 // sequence-specific DNA binding transcription factor activity // inferred from electronic annotation /// 0030528 // transcription regulator activity // inferred from electronic annotation /// 0043565 // sequence-specific DNA binding // inferred from electronic annotation	---
2825733	HSD17B4	NM_000414 // HSD17B4 // hydroxysteroid (17-beta) dehydrogenase 4 // 5q21 // 3295	TAAATGTCC	2.73561	chr5:118788222-118878024 (+) // 99.85 // q23.1	1.90777	0.931887	1.90777	AA up vs CA	0000038 // very long-chain fatty acid metabolic process // inferred from electronic annotation /// 0006629 // lipid metabolic process // inferred from electronic annotation /// 0006631 // fatty acid metabolic process // inferred from electronic annotation /// 0006635 // fatty acid beta-oxidation // inferred from electronic annotation /// 0008152 // metabolic process // inferred from electronic an…	0005739 // mitochondrion // inferred from electronic annotation /// 0005777 // peroxisome // inferred from electronic annotation /// 0005777 // peroxisome // traceable author statement /// 0005782 // peroxisomal matrix // not recorded	0003824 // catalytic activity // inferred from electronic annotation /// 0003857 // 3-hydroxyacyl-CoA dehydrogenase activity // not recorded /// 0003857 // 3-hydroxyacyl-CoA dehydrogenase activity // inferred from electronic annotation /// 0004303 // estradiol 17-beta-dehydrogenase activity // traceable author statement /// 0005488 // binding // inferred from electronic annotation /// 0005515 // …	Steroid_Biosynthesis // GenMAPP
3540136	HSPA2	NM_021979 // HSPA2 // heat shock 70kDa protein 2 // 14q24.1 // 3306 /// ENST0000	GCTGTGTCC	4.89044	chr14:64590735-65009952 (+) // 50.54 // q23.2	0.563787	-0.826778	-1.77372	AA down vs CA	0006950 // response to stress // inferred from electronic annotation /// 0006986 // response to unfolded protein // traceable author statement /// 0007140 // male meiosis // traceable author statement /// 0007286 // spermatid development // traceable author statement	0005739 // mitochondrion // inferred from electronic annotation /// 0009986 // cell surface // inferred from direct assay	0000166 // nucleotide binding // inferred from electronic annotation /// 0005515 // protein binding // inferred from electronic annotation /// 0005524 // ATP binding // inferred from electronic annotation /// 0051082 // unfolded protein binding // traceable author statement	---
3540136	HSPA2	NM_021979 // HSPA2 // heat shock 70kDa protein 2 // 14q24.1 // 3306 /// ENST0000	GGACAGTAC	1.00606	chr14:64590735-65009952 (+) // 50.54 // q23.2	0.563787	-0.826778	-1.77372	AA down vs CA	0006950 // response to stress // inferred from electronic annotation /// 0006986 // response to unfolded protein // traceable author statement /// 0007140 // male meiosis // traceable author statement /// 0007286 // spermatid development // traceable author statement	0005739 // mitochondrion // inferred from electronic annotation /// 0009986 // cell surface // inferred from direct assay	0000166 // nucleotide binding // inferred from electronic annotation /// 0005515 // protein binding // inferred from electronic annotation /// 0005524 // ATP binding // inferred from electronic annotation /// 0051082 // unfolded protein binding // traceable author statement	---
2859387	HTR1A	NM_000524 // HTR1A // 5-hydroxytryptamine (serotonin) receptor 1A // 5q11.2-q13	GAACTGTCC	1.00606	chr5:63256277-63257546 (-) // 99.53 // q12.3	0.559765	-0.837107	-1.78647	AA down vs CA	0007165 // signal transduction // inferred from electronic annotation /// 0007186 // G-protein coupled receptor protein signaling pathway // traceable author statement /// 0007186 // G-protein coupled receptor protein signaling pathway // inferred from electronic annotation /// 0007198 // inhibition of adenylate cyclase activity by serotonin receptor signaling pathway // inferred from electronic …	0005886 // plasma membrane // not recorded /// 0005886 // plasma membrane // inferred from electronic annotation /// 0005887 // integral to plasma membrane // traceable author statement /// 0016020 // membrane // inferred from electronic annotation /// 0016021 // integral to membrane // inferred from electronic annotation /// 0043025 // neuronal cell body // inferred from electronic annotation //…	0001965 // G-protein alpha-subunit binding // inferred from electronic annotation /// 0004871 // signal transducer activity // inferred from electronic annotation /// 0004872 // receptor activity // inferred from electronic annotation /// 0004930 // G-protein coupled receptor activity // inferred from electronic annotation /// 0004993 // serotonin receptor activity // inferred from electronic ann…	GPCRDB_Class_A_Rhodopsin-like // GenMAPP /// Monoamine_GPCRs // GenMAPP
3513147	HTR2A	NM_000621 // HTR2A // 5-hydroxytryptamine (serotonin) receptor 2A // 13q14-q21 /	GGACACTCA	2.26764	chr13:47407512-47470173 (-) // 86.44 // q14.2	0.580893	-0.783656	-1.72149	AA down vs CA	0001659 // temperature homeostasis // inferred from electronic annotation /// 0006950 // response to stress // inferred from electronic annotation /// 0007165 // signal transduction // inferred from electronic annotation /// 0007186 // G-protein coupled receptor protein signaling pathway // inferred from electronic annotation /// 0007208 // activation of phospholipase C activity by serotonin rece…	0005737 // cytoplasm // inferred from electronic annotation /// 0005886 // plasma membrane // not recorded /// 0005886 // plasma membrane // inferred from direct assay /// 0005886 // plasma membrane // inferred from electronic annotation /// 0005887 // integral to plasma membrane // traceable author statement /// 0016020 // membrane // inferred from electronic annotation /// 0016021 // integral t…	0004435 // phosphoinositide phospholipase C activity // inferred from mutant phenotype /// 0004871 // signal transducer activity // inferred from electronic annotation /// 0004872 // receptor activity // inferred from electronic annotation /// 0004930 // G-protein coupled receptor activity // inferred from electronic annotation /// 0004993 // serotonin receptor activity // inferred from direct as…	GPCRDB_Class_A_Rhodopsin-like // GenMAPP /// GPCRDB_Other // GenMAPP /// Monoamine_GPCRs // GenMAPP
3513147	HTR2A	NM_000621 // HTR2A // 5-hydroxytryptamine (serotonin) receptor 2A // 13q14-q21 /	GGACACTCA	2.26764	chr13:47408995-47470017 (-) // 99.71 // q14.2	0.580893	-0.783656	-1.72149	AA down vs CA	0001659 // temperature homeostasis // inferred from electronic annotation /// 0006950 // response to stress // inferred from electronic annotation /// 0007165 // signal transduction // inferred from electronic annotation /// 0007186 // G-protein coupled receptor protein signaling pathway // inferred from electronic annotation /// 0007208 // activation of phospholipase C activity by serotonin rece…	0005737 // cytoplasm // inferred from electronic annotation /// 0005886 // plasma membrane // not recorded /// 0005886 // plasma membrane // inferred from direct assay /// 0005886 // plasma membrane // inferred from electronic annotation /// 0005887 // integral to plasma membrane // traceable author statement /// 0016020 // membrane // inferred from electronic annotation /// 0016021 // integral t…	0004435 // phosphoinositide phospholipase C activity // inferred from mutant phenotype /// 0004871 // signal transducer activity // inferred from electronic annotation /// 0004872 // receptor activity // inferred from electronic annotation /// 0004930 // G-protein coupled receptor activity // inferred from electronic annotation /// 0004993 // serotonin receptor activity // inferred from direct as…	GPCRDB_Class_A_Rhodopsin-like // GenMAPP /// GPCRDB_Other // GenMAPP /// Monoamine_GPCRs // GenMAPP
3349660	HTR3B	NM_006028 // HTR3B // 5-hydroxytryptamine (serotonin) receptor 3B // 11q23.1 //	TTAGTGTCC	2.51915	chr11:113775588-113816966 (+) // 98.27 // q23.2	0.578071	-0.790681	-1.72989	AA down vs CA	0006810 // transport // traceable author statement /// 0006810 // transport // inferred from electronic annotation /// 0006811 // ion transport // inferred from electronic annotation /// 0007210 // serotonin receptor signaling pathway // inferred from electronic annotation /// 0007268 // synaptic transmission // traceable author statement	0005886 // plasma membrane // inferred from electronic annotation /// 0005887 // integral to plasma membrane // inferred from electronic annotation /// 0005887 // integral to plasma membrane // traceable author statement /// 0016020 // membrane // inferred from electronic annotation /// 0016021 // integral to membrane // inferred from electronic annotation /// 0045211 // postsynaptic membrane // …	0004872 // receptor activity // inferred from electronic annotation /// 0004993 // serotonin receptor activity // inferred from electronic annotation /// 0004993 // serotonin receptor activity // traceable author statement /// 0005216 // ion channel activity // inferred from electronic annotation /// 0005216 // ion channel activity // traceable author statement /// 0005230 // extracellular ligand…	---
3824874	IFI30	NM_006332 // IFI30 // interferon, gamma-inducible protein 30 // 19p13.1 // 10437	CCACTGTCC	2.15934	chr19:18284624-18288923 (+) // 90.7 // p13.11	1.76224	0.81741	1.76224	AA up vs CA	0019886 // antigen processing and presentation of exogenous peptide antigen via MHC class II // inferred from electronic annotation /// 0048147 // negative regulation of fibroblast proliferation // inferred from electronic annotation /// 0050821 // protein stabilization // inferred from electronic annotation /// 0055114 // oxidation reduction // inferred from electronic annotation	0005576 // extracellular region // traceable author statement /// 0005764 // lysosome // inferred from electronic annotation /// 0005764 // lysosome // traceable author statement	0016491 // oxidoreductase activity // inferred from electronic annotation	---
3824874	IFI30	NM_006332 // IFI30 // interferon, gamma-inducible protein 30 // 19p13.1 // 10437	GGACACTCA	2.26764	chr19:18284624-18288923 (+) // 90.7 // p13.11	1.76224	0.81741	1.76224	AA up vs CA	0019886 // antigen processing and presentation of exogenous peptide antigen via MHC class II // inferred from electronic annotation /// 0048147 // negative regulation of fibroblast proliferation // inferred from electronic annotation /// 0050821 // protein stabilization // inferred from electronic annotation /// 0055114 // oxidation reduction // inferred from electronic annotation	0005576 // extracellular region // traceable author statement /// 0005764 // lysosome // inferred from electronic annotation /// 0005764 // lysosome // traceable author statement	0016491 // oxidoreductase activity // inferred from electronic annotation	---
2772566	IGJ	NM_144646 // IGJ // immunoglobulin J polypeptide, linker protein for immunoglobu	GGACATTTG	4.03121	chr4:71521258-71532344 (-) // 95.36 // q13.3	1.74728	0.805111	1.74728	AA up vs CA	0006955 // immune response // non-traceable author statement	0005576 // extracellular region // non-traceable author statement /// 0005576 // extracellular region // inferred from electronic annotation	0003823 // antigen binding // non-traceable author statement	---
2784279	IL21	NM_021803 // IL21 // interleukin 21 // 4q26-q27 // 59067 /// ENST00000264497 //	GGACATTAG	4.03121	chr4:123533782-123542212 (-) // 95.95 // q27	0.563901	-0.826486	-1.77336	AA down vs CA	0006955 // immune response // inferred from electronic annotation /// 0007165 // signal transduction // non-traceable author statement /// 0042102 // positive regulation of T cell proliferation // inferred from direct assay /// 0045078 // positive regulation of interferon-gamma biosynthetic process // non-traceable author statement /// 0048469 // cell maturation // inferred from direct assay	0005576 // extracellular region // inferred from electronic annotation /// 0005615 // extracellular space // non-traceable author statement /// 0005615 // extracellular space // inferred from electronic annotation	0005125 // cytokine activity // inferred from electronic annotation /// 0005126 // cytokine receptor binding // traceable author statement /// 0005126 // cytokine receptor binding // inferred from electronic annotation /// 0005134 // interleukin-2 receptor binding // inferred from physical interaction	---
2377035	IL24	NM_006850 // IL24 // interleukin 24 // 1q32 // 11009 /// NM_001185156 // IL24 //	CTACTGTCC	3.16539	chr1:207070788-207077209 (+) // 90.65 // q32.1	0.577317	-0.792564	-1.73215	AA down vs CA	0006915 // apoptosis // inferred from electronic annotation /// 0006915 // apoptosis // traceable author statement /// 0006916 // anti-apoptosis // traceable author statement /// 0006968 // cellular defense response // traceable author statement	0005576 // extracellular region // inferred from electronic annotation /// 0005615 // extracellular space // inferred from electronic annotation /// 0016020 // membrane // inferred from electronic annotation /// 0016021 // integral to membrane // inferred from electronic annotation	0005125 // cytokine activity // inferred from electronic annotation	---
2377035	IL24	NM_006850 // IL24 // interleukin 24 // 1q32 // 11009 /// NM_001185156 // IL24 //	GTATTGTCC	1.65542	chr1:207070788-207077209 (+) // 90.65 // q32.1	0.577317	-0.792564	-1.73215	AA down vs CA	0006915 // apoptosis // inferred from electronic annotation /// 0006915 // apoptosis // traceable author statement /// 0006916 // anti-apoptosis // traceable author statement /// 0006968 // cellular defense response // traceable author statement	0005576 // extracellular region // inferred from electronic annotation /// 0005615 // extracellular space // inferred from electronic annotation /// 0016020 // membrane // inferred from electronic annotation /// 0016021 // integral to membrane // inferred from electronic annotation	0005125 // cytokine activity // inferred from electronic annotation	---
3820663	ILF3	NM_012218 // ILF3 // interleukin enhancer binding factor 3, 90kDa // 19p13.2 //	GGACAAAGC	4.89044	chr19:10764973-10796441 (+) // 97.99 // p13.2	1.73223	0.79263	1.73223	AA up vs CA	0000279 // M phase // non-traceable author statement /// 0006350 // transcription // inferred from electronic annotation /// 0045449 // regulation of transcription // inferred from electronic annotation /// 0045892 // negative regulation of transcription, DNA-dependent // inferred from direct assay /// 0045893 // positive regulation of transcription, DNA-dependent // inferred from direct assay	0005622 // intracellular // inferred from electronic annotation /// 0005634 // nucleus // inferred from direct assay /// 0005634 // nucleus // non-traceable author statement /// 0005634 // nucleus // inferred from electronic annotation /// 0005730 // nucleolus // inferred from electronic annotation /// 0005737 // cytoplasm // inferred from electronic annotation /// 0005739 // mitochondrion // inf…	0003677 // DNA binding // inferred from direct assay /// 0003677 // DNA binding // inferred from electronic annotation /// 0003723 // RNA binding // non-traceable author statement /// 0003723 // RNA binding // inferred from electronic annotation /// 0003725 // double-stranded RNA binding // inferred from direct assay /// 0003725 // double-stranded RNA binding // inferred from electronic annotatio…	---
3820663	ILF3	NM_012218 // ILF3 // interleukin enhancer binding factor 3, 90kDa // 19p13.2 //	GGACAAAGC	4.89044	chr19:10781269-10796150 (+) // 98.66 // p13.2	1.73223	0.79263	1.73223	AA up vs CA	0000279 // M phase // non-traceable author statement /// 0006350 // transcription // inferred from electronic annotation /// 0045449 // regulation of transcription // inferred from electronic annotation /// 0045892 // negative regulation of transcription, DNA-dependent // inferred from direct assay /// 0045893 // positive regulation of transcription, DNA-dependent // inferred from direct assay	0005622 // intracellular // inferred from electronic annotation /// 0005634 // nucleus // inferred from direct assay /// 0005634 // nucleus // non-traceable author statement /// 0005634 // nucleus // inferred from electronic annotation /// 0005730 // nucleolus // inferred from electronic annotation /// 0005737 // cytoplasm // inferred from electronic annotation /// 0005739 // mitochondrion // inf…	0003677 // DNA binding // inferred from direct assay /// 0003677 // DNA binding // inferred from electronic annotation /// 0003723 // RNA binding // non-traceable author statement /// 0003723 // RNA binding // inferred from electronic annotation /// 0003725 // double-stranded RNA binding // inferred from direct assay /// 0003725 // double-stranded RNA binding // inferred from electronic annotatio…	---
3820663	ILF3	NM_012218 // ILF3 // interleukin enhancer binding factor 3, 90kDa // 19p13.2 //	GGACAAAGC	4.89044	chr19:10781189-10800442 (+) // 99.06 // p13.2	1.73223	0.79263	1.73223	AA up vs CA	0000279 // M phase // non-traceable author statement /// 0006350 // transcription // inferred from electronic annotation /// 0045449 // regulation of transcription // inferred from electronic annotation /// 0045892 // negative regulation of transcription, DNA-dependent // inferred from direct assay /// 0045893 // positive regulation of transcription, DNA-dependent // inferred from direct assay	0005622 // intracellular // inferred from electronic annotation /// 0005634 // nucleus // inferred from direct assay /// 0005634 // nucleus // non-traceable author statement /// 0005634 // nucleus // inferred from electronic annotation /// 0005730 // nucleolus // inferred from electronic annotation /// 0005737 // cytoplasm // inferred from electronic annotation /// 0005739 // mitochondrion // inf…	0003677 // DNA binding // inferred from direct assay /// 0003677 // DNA binding // inferred from electronic annotation /// 0003723 // RNA binding // non-traceable author statement /// 0003723 // RNA binding // inferred from electronic annotation /// 0003725 // double-stranded RNA binding // inferred from direct assay /// 0003725 // double-stranded RNA binding // inferred from electronic annotatio…	---
3820663	ILF3	NM_012218 // ILF3 // interleukin enhancer binding factor 3, 90kDa // 19p13.2 //	GGACAAAGC	4.89044	chr19:10801396-10803093 (+) // 98.89 // p13.2	1.73223	0.79263	1.73223	AA up vs CA	0000279 // M phase // non-traceable author statement /// 0006350 // transcription // inferred from electronic annotation /// 0045449 // regulation of transcription // inferred from electronic annotation /// 0045892 // negative regulation of transcription, DNA-dependent // inferred from direct assay /// 0045893 // positive regulation of transcription, DNA-dependent // inferred from direct assay	0005622 // intracellular // inferred from electronic annotation /// 0005634 // nucleus // inferred from direct assay /// 0005634 // nucleus // non-traceable author statement /// 0005634 // nucleus // inferred from electronic annotation /// 0005730 // nucleolus // inferred from electronic annotation /// 0005737 // cytoplasm // inferred from electronic annotation /// 0005739 // mitochondrion // inf…	0003677 // DNA binding // inferred from direct assay /// 0003677 // DNA binding // inferred from electronic annotation /// 0003723 // RNA binding // non-traceable author statement /// 0003723 // RNA binding // inferred from electronic annotation /// 0003725 // double-stranded RNA binding // inferred from direct assay /// 0003725 // double-stranded RNA binding // inferred from electronic annotatio…	---
3820663	ILF3	NM_012218 // ILF3 // interleukin enhancer binding factor 3, 90kDa // 19p13.2 //	GGACAAAGC	4.89044	chr19:10764987-10800523 (+) // 98.2 // p13.2	1.73223	0.79263	1.73223	AA up vs CA	0000279 // M phase // non-traceable author statement /// 0006350 // transcription // inferred from electronic annotation /// 0045449 // regulation of transcription // inferred from electronic annotation /// 0045892 // negative regulation of transcription, DNA-dependent // inferred from direct assay /// 0045893 // positive regulation of transcription, DNA-dependent // inferred from direct assay	0005622 // intracellular // inferred from electronic annotation /// 0005634 // nucleus // inferred from direct assay /// 0005634 // nucleus // non-traceable author statement /// 0005634 // nucleus // inferred from electronic annotation /// 0005730 // nucleolus // inferred from electronic annotation /// 0005737 // cytoplasm // inferred from electronic annotation /// 0005739 // mitochondrion // inf…	0003677 // DNA binding // inferred from direct assay /// 0003677 // DNA binding // inferred from electronic annotation /// 0003723 // RNA binding // non-traceable author statement /// 0003723 // RNA binding // inferred from electronic annotation /// 0003725 // double-stranded RNA binding // inferred from direct assay /// 0003725 // double-stranded RNA binding // inferred from electronic annotatio…	---
3976120	INE1	NR_024616 // INE1 // inactivation escape 1 (non-protein coding) // Xp11.4-p11.3	GGACAGTGT	1.72747	chrX:47064319-47065252 (+) // 31.92 // p11.23	0.506692	-0.980819	-1.97358	AA down vs CA	---	---	---	Proteasome_Degradation // GenMAPP
2374872	IPO9	NM_018085 // IPO9 // importin 9 // 1q32.1 // 55705 /// ENST00000361565 // IPO9 /	TAAATGTCC	2.73561	chr1:201851913-201853419 (+) // 43.8 // q32.1	1.81007	0.856045	1.81007	AA up vs CA	0006606 // protein import into nucleus // non-traceable author statement /// 0006606 // protein import into nucleus // inferred from electronic annotation /// 0006810 // transport // inferred from electronic annotation /// 0006886 // intracellular protein transport // inferred from electronic annotation /// 0015031 // protein transport // inferred from electronic annotation	0005634 // nucleus // inferred from electronic annotation /// 0005737 // cytoplasm // inferred from direct assay /// 0005737 // cytoplasm // inferred from electronic annotation	0005488 // binding // inferred from electronic annotation /// 0005515 // protein binding // inferred from physical interaction /// 0008565 // protein transporter activity // inferred from direct assay /// 0008565 // protein transporter activity // inferred from electronic annotation /// 0042393 // histone binding // inferred from sequence or structural similarity /// 0042393 // histone binding //…	---
2374872	IPO9	NM_018085 // IPO9 // importin 9 // 1q32.1 // 55705 /// ENST00000361565 // IPO9 /	TAAATGTCC	2.73561	chr1:201836010-201845854 (+) // 98.07 // q32.1	1.81007	0.856045	1.81007	AA up vs CA	0006606 // protein import into nucleus // non-traceable author statement /// 0006606 // protein import into nucleus // inferred from electronic annotation /// 0006810 // transport // inferred from electronic annotation /// 0006886 // intracellular protein transport // inferred from electronic annotation /// 0015031 // protein transport // inferred from electronic annotation	0005634 // nucleus // inferred from electronic annotation /// 0005737 // cytoplasm // inferred from direct assay /// 0005737 // cytoplasm // inferred from electronic annotation	0005488 // binding // inferred from electronic annotation /// 0005515 // protein binding // inferred from physical interaction /// 0008565 // protein transporter activity // inferred from direct assay /// 0008565 // protein transporter activity // inferred from electronic annotation /// 0042393 // histone binding // inferred from sequence or structural similarity /// 0042393 // histone binding //…	---
2875348	IRF1	NM_002198 // IRF1 // interferon regulatory factor 1 // 5q31.1 // 3659 /// ENST00	GGGCTGTCC	4.99562	chr5:131818779-131826427 (-) // 99.46 // q31.1	2.06175	1.04387	2.06175	AA up vs CA	0006350 // transcription // inferred from electronic annotation /// 0006355 // regulation of transcription, DNA-dependent // inferred from electronic annotation /// 0006366 // transcription from RNA polymerase II promoter // traceable author statement /// 0010468 // regulation of gene expression // inferred from electronic annotation /// 0043374 // CD8-positive, alpha-beta T cell differentiation …	0005634 // nucleus // inferred from electronic annotation	0003677 // DNA binding // inferred from electronic annotation /// 0003700 // sequence-specific DNA binding transcription factor activity // inferred from electronic annotation /// 0043565 // sequence-specific DNA binding // inferred from electronic annotation	Apoptosis // GenMAPP
2692816	ITGB5	NM_002213 // ITGB5 // integrin, beta 5 // 3q21.2 // 3693 /// ENST00000296181 //	AAATTGTCC	3.38289	chr3:124482009-124482116 (+) // 46.54 // q21.2	1.87705	0.908467	1.87705	AA up vs CA	0006936 // muscle contraction // not recorded /// 0007155 // cell adhesion // inferred from electronic annotation /// 0007160 // cell-matrix adhesion // inferred from electronic annotation /// 0007229 // integrin-mediated signaling pathway // inferred from electronic annotation /// 0007275 // multicellular organismal development // inferred from electronic annotation	0005886 // plasma membrane // not recorded /// 0005925 // focal adhesion // inferred from electronic annotation /// 0008305 // integrin complex // inferred from electronic annotation /// 0016020 // membrane // inferred from electronic annotation /// 0016021 // integral to membrane // inferred from electronic annotation /// 0031252 // cell leading edge // inferred from electronic annotation	0004872 // receptor activity // inferred from electronic annotation /// 0005178 // integrin binding // inferred from electronic annotation /// 0005488 // binding // inferred from electronic annotation	Integrin-mediated_cell_adhesion_KEGG // GenMAPP
2692816	ITGB5	NM_002213 // ITGB5 // integrin, beta 5 // 3q21.2 // 3693 /// ENST00000296181 //	GGACAGTTT	2.73353	chr3:124482009-124482116 (+) // 46.54 // q21.2	1.87705	0.908467	1.87705	AA up vs CA	0006936 // muscle contraction // not recorded /// 0007155 // cell adhesion // inferred from electronic annotation /// 0007160 // cell-matrix adhesion // inferred from electronic annotation /// 0007229 // integrin-mediated signaling pathway // inferred from electronic annotation /// 0007275 // multicellular organismal development // inferred from electronic annotation	0005886 // plasma membrane // not recorded /// 0005925 // focal adhesion // inferred from electronic annotation /// 0008305 // integrin complex // inferred from electronic annotation /// 0016020 // membrane // inferred from electronic annotation /// 0016021 // integral to membrane // inferred from electronic annotation /// 0031252 // cell leading edge // inferred from electronic annotation	0004872 // receptor activity // inferred from electronic annotation /// 0005178 // integrin binding // inferred from electronic annotation /// 0005488 // binding // inferred from electronic annotation	Integrin-mediated_cell_adhesion_KEGG // GenMAPP
2692816	ITGB5	NM_002213 // ITGB5 // integrin, beta 5 // 3q21.2 // 3693 /// ENST00000296181 //	AAATTGTCC	3.38289	chr3:124480761-124606152 (-) // 94.59 // q21.2	1.87705	0.908467	1.87705	AA up vs CA	0006936 // muscle contraction // not recorded /// 0007155 // cell adhesion // inferred from electronic annotation /// 0007160 // cell-matrix adhesion // inferred from electronic annotation /// 0007229 // integrin-mediated signaling pathway // inferred from electronic annotation /// 0007275 // multicellular organismal development // inferred from electronic annotation	0005886 // plasma membrane // not recorded /// 0005925 // focal adhesion // inferred from electronic annotation /// 0008305 // integrin complex // inferred from electronic annotation /// 0016020 // membrane // inferred from electronic annotation /// 0016021 // integral to membrane // inferred from electronic annotation /// 0031252 // cell leading edge // inferred from electronic annotation	0004872 // receptor activity // inferred from electronic annotation /// 0005178 // integrin binding // inferred from electronic annotation /// 0005488 // binding // inferred from electronic annotation	Integrin-mediated_cell_adhesion_KEGG // GenMAPP
2692816	ITGB5	NM_002213 // ITGB5 // integrin, beta 5 // 3q21.2 // 3693 /// ENST00000296181 //	GGACAGTTT	2.73353	chr3:124480761-124606152 (-) // 94.59 // q21.2	1.87705	0.908467	1.87705	AA up vs CA	0006936 // muscle contraction // not recorded /// 0007155 // cell adhesion // inferred from electronic annotation /// 0007160 // cell-matrix adhesion // inferred from electronic annotation /// 0007229 // integrin-mediated signaling pathway // inferred from electronic annotation /// 0007275 // multicellular organismal development // inferred from electronic annotation	0005886 // plasma membrane // not recorded /// 0005925 // focal adhesion // inferred from electronic annotation /// 0008305 // integrin complex // inferred from electronic annotation /// 0016020 // membrane // inferred from electronic annotation /// 0016021 // integral to membrane // inferred from electronic annotation /// 0031252 // cell leading edge // inferred from electronic annotation	0004872 // receptor activity // inferred from electronic annotation /// 0005178 // integrin binding // inferred from electronic annotation /// 0005488 // binding // inferred from electronic annotation	Integrin-mediated_cell_adhesion_KEGG // GenMAPP
2692816	ITGB5	NM_002213 // ITGB5 // integrin, beta 5 // 3q21.2 // 3693 /// ENST00000296181 //	AAATTGTCC	3.38289	chr3:124481795-124605876 (-) // 99.42 // q21.2	1.87705	0.908467	1.87705	AA up vs CA	0006936 // muscle contraction // not recorded /// 0007155 // cell adhesion // inferred from electronic annotation /// 0007160 // cell-matrix adhesion // inferred from electronic annotation /// 0007229 // integrin-mediated signaling pathway // inferred from electronic annotation /// 0007275 // multicellular organismal development // inferred from electronic annotation	0005886 // plasma membrane // not recorded /// 0005925 // focal adhesion // inferred from electronic annotation /// 0008305 // integrin complex // inferred from electronic annotation /// 0016020 // membrane // inferred from electronic annotation /// 0016021 // integral to membrane // inferred from electronic annotation /// 0031252 // cell leading edge // inferred from electronic annotation	0004872 // receptor activity // inferred from electronic annotation /// 0005178 // integrin binding // inferred from electronic annotation /// 0005488 // binding // inferred from electronic annotation	Integrin-mediated_cell_adhesion_KEGG // GenMAPP
2692816	ITGB5	NM_002213 // ITGB5 // integrin, beta 5 // 3q21.2 // 3693 /// ENST00000296181 //	GGACAGTTT	2.73353	chr3:124481795-124605876 (-) // 99.42 // q21.2	1.87705	0.908467	1.87705	AA up vs CA	0006936 // muscle contraction // not recorded /// 0007155 // cell adhesion // inferred from electronic annotation /// 0007160 // cell-matrix adhesion // inferred from electronic annotation /// 0007229 // integrin-mediated signaling pathway // inferred from electronic annotation /// 0007275 // multicellular organismal development // inferred from electronic annotation	0005886 // plasma membrane // not recorded /// 0005925 // focal adhesion // inferred from electronic annotation /// 0008305 // integrin complex // inferred from electronic annotation /// 0016020 // membrane // inferred from electronic annotation /// 0016021 // integral to membrane // inferred from electronic annotation /// 0031252 // cell leading edge // inferred from electronic annotation	0004872 // receptor activity // inferred from electronic annotation /// 0005178 // integrin binding // inferred from electronic annotation /// 0005488 // binding // inferred from electronic annotation	Integrin-mediated_cell_adhesion_KEGG // GenMAPP
2692816	ITGB5	NM_002213 // ITGB5 // integrin, beta 5 // 3q21.2 // 3693 /// ENST00000296181 //	AAATTGTCC	3.38289	chr3:124482009-124482116 (-) // 46.54 // q21.2	1.87705	0.908467	1.87705	AA up vs CA	0006936 // muscle contraction // not recorded /// 0007155 // cell adhesion // inferred from electronic annotation /// 0007160 // cell-matrix adhesion // inferred from electronic annotation /// 0007229 // integrin-mediated signaling pathway // inferred from electronic annotation /// 0007275 // multicellular organismal development // inferred from electronic annotation	0005886 // plasma membrane // not recorded /// 0005925 // focal adhesion // inferred from electronic annotation /// 0008305 // integrin complex // inferred from electronic annotation /// 0016020 // membrane // inferred from electronic annotation /// 0016021 // integral to membrane // inferred from electronic annotation /// 0031252 // cell leading edge // inferred from electronic annotation	0004872 // receptor activity // inferred from electronic annotation /// 0005178 // integrin binding // inferred from electronic annotation /// 0005488 // binding // inferred from electronic annotation	Integrin-mediated_cell_adhesion_KEGG // GenMAPP
2692816	ITGB5	NM_002213 // ITGB5 // integrin, beta 5 // 3q21.2 // 3693 /// ENST00000296181 //	GGACAGTTT	2.73353	chr3:124482009-124482116 (-) // 46.54 // q21.2	1.87705	0.908467	1.87705	AA up vs CA	0006936 // muscle contraction // not recorded /// 0007155 // cell adhesion // inferred from electronic annotation /// 0007160 // cell-matrix adhesion // inferred from electronic annotation /// 0007229 // integrin-mediated signaling pathway // inferred from electronic annotation /// 0007275 // multicellular organismal development // inferred from electronic annotation	0005886 // plasma membrane // not recorded /// 0005925 // focal adhesion // inferred from electronic annotation /// 0008305 // integrin complex // inferred from electronic annotation /// 0016020 // membrane // inferred from electronic annotation /// 0016021 // integral to membrane // inferred from electronic annotation /// 0031252 // cell leading edge // inferred from electronic annotation	0004872 // receptor activity // inferred from electronic annotation /// 0005178 // integrin binding // inferred from electronic annotation /// 0005488 // binding // inferred from electronic annotation	Integrin-mediated_cell_adhesion_KEGG // GenMAPP
2448073	IVNS1ABP	NM_006469 // IVNS1ABP // influenza virus NS1A binding protein // 1q25.1-q31.1 //	CTAATGTCC	4.03121	chr1:185265529-185286386 (-) // 99.03 // q25.3	1.81238	0.857885	1.81238	AA up vs CA	0006383 // transcription from RNA polymerase III promoter // traceable author statement /// 0008380 // RNA splicing // traceable author statement /// 0009615 // response to virus // traceable author statement /// 0044419 // interspecies interaction between organisms // inferred from electronic annotation	0005634 // nucleus // inferred from electronic annotation /// 0005654 // nucleoplasm // inferred from electronic annotation /// 0005667 // transcription factor complex // traceable author statement /// 0005681 // spliceosomal complex // traceable author statement /// 0005737 // cytoplasm // inferred from electronic annotation /// 0005856 // cytoskeleton // inferred from electronic annotation	0005515 // protein binding // inferred from electronic annotation	---
2448073	IVNS1ABP	NM_006469 // IVNS1ABP // influenza virus NS1A binding protein // 1q25.1-q31.1 //	CTAATGTCC	4.03121	chr1:185266043-185286468 (-) // 97.85 // q25.3	1.81238	0.857885	1.81238	AA up vs CA	0006383 // transcription from RNA polymerase III promoter // traceable author statement /// 0008380 // RNA splicing // traceable author statement /// 0009615 // response to virus // traceable author statement /// 0044419 // interspecies interaction between organisms // inferred from electronic annotation	0005634 // nucleus // inferred from electronic annotation /// 0005654 // nucleoplasm // inferred from electronic annotation /// 0005667 // transcription factor complex // traceable author statement /// 0005681 // spliceosomal complex // traceable author statement /// 0005737 // cytoplasm // inferred from electronic annotation /// 0005856 // cytoskeleton // inferred from electronic annotation	0005515 // protein binding // inferred from electronic annotation	---
2448073	IVNS1ABP	NM_006469 // IVNS1ABP // influenza virus NS1A binding protein // 1q25.1-q31.1 //	CTAATGTCC	4.03121	chr1:185266897-185286375 (-) // 98.73 // q25.3	1.81238	0.857885	1.81238	AA up vs CA	0006383 // transcription from RNA polymerase III promoter // traceable author statement /// 0008380 // RNA splicing // traceable author statement /// 0009615 // response to virus // traceable author statement /// 0044419 // interspecies interaction between organisms // inferred from electronic annotation	0005634 // nucleus // inferred from electronic annotation /// 0005654 // nucleoplasm // inferred from electronic annotation /// 0005667 // transcription factor complex // traceable author statement /// 0005681 // spliceosomal complex // traceable author statement /// 0005737 // cytoplasm // inferred from electronic annotation /// 0005856 // cytoskeleton // inferred from electronic annotation	0005515 // protein binding // inferred from electronic annotation	---
3771773	JMJD6	NM_001081461 // JMJD6 // jumonji domain containing 6 // 17q25 // 23210 /// NM_01	GGACAGCCC	4.99562	chr17:74714532-74722754 (-) // 94.19 // q25.1	0.465758	-1.10235	-2.14704	AA down vs CA	0001568 // blood vessel development // inferred from electronic annotation /// 0001822 // kidney development // inferred from electronic annotation /// 0006350 // transcription // inferred from electronic annotation /// 0006397 // mRNA processing // inferred from electronic annotation /// 0006915 // apoptosis // inferred from electronic annotation /// 0007166 // cell surface receptor linked signa…	0005634 // nucleus // inferred from direct assay /// 0005634 // nucleus // inferred from electronic annotation /// 0005886 // plasma membrane // inferred from electronic annotation	0004872 // receptor activity // inferred from electronic annotation /// 0005515 // protein binding // inferred from physical interaction /// 0016491 // oxidoreductase activity // inferred from electronic annotation /// 0016702 // oxidoreductase activity, acting on single donors with incorporation of molecular oxygen, incorporation of two atoms of oxygen // inferred from electronic annotation /// …	---
3771773	JMJD6	NM_001081461 // JMJD6 // jumonji domain containing 6 // 17q25 // 23210 /// NM_01	GGACAGCCC	4.99562	chr17:74714532-74722754 (-) // 94.19 // q25.1	0.465758	-1.10235	-2.14704	AA down vs CA	0001568 // blood vessel development // inferred from electronic annotation /// 0001822 // kidney development // inferred from electronic annotation /// 0006350 // transcription // inferred from electronic annotation /// 0006397 // mRNA processing // inferred from electronic annotation /// 0006915 // apoptosis // inferred from electronic annotation /// 0007166 // cell surface receptor linked signa…	0005634 // nucleus // inferred from direct assay /// 0005634 // nucleus // inferred from electronic annotation /// 0005886 // plasma membrane // inferred from electronic annotation	0004872 // receptor activity // inferred from electronic annotation /// 0005515 // protein binding // inferred from physical interaction /// 0016491 // oxidoreductase activity // inferred from electronic annotation /// 0016702 // oxidoreductase activity, acting on single donors with incorporation of molecular oxygen, incorporation of two atoms of oxygen // inferred from electronic annotation /// …	---
3771773	JMJD6	NM_001081461 // JMJD6 // jumonji domain containing 6 // 17q25 // 23210 /// NM_01	GGACAGCCC	4.99562	chr17:74708911-74722563 (-) // 91.67 // q25.1	0.465758	-1.10235	-2.14704	AA down vs CA	0001568 // blood vessel development // inferred from electronic annotation /// 0001822 // kidney development // inferred from electronic annotation /// 0006350 // transcription // inferred from electronic annotation /// 0006397 // mRNA processing // inferred from electronic annotation /// 0006915 // apoptosis // inferred from electronic annotation /// 0007166 // cell surface receptor linked signa…	0005634 // nucleus // inferred from direct assay /// 0005634 // nucleus // inferred from electronic annotation /// 0005886 // plasma membrane // inferred from electronic annotation	0004872 // receptor activity // inferred from electronic annotation /// 0005515 // protein binding // inferred from physical interaction /// 0016491 // oxidoreductase activity // inferred from electronic annotation /// 0016702 // oxidoreductase activity, acting on single donors with incorporation of molecular oxygen, incorporation of two atoms of oxygen // inferred from electronic annotation /// …	---
3079202	KCNH2	NM_000238 // KCNH2 // potassium voltage-gated channel, subfamily H (eag-related)	AGAATGTCC	3.34783	chr7:150642049-150675178 (-) // 93.71 // q36.1	0.575779	-0.796413	-1.73678	AA down vs CA	0000160 // two-component signal transduction system (phosphorelay) // inferred from electronic annotation /// 0006355 // regulation of transcription, DNA-dependent // inferred from electronic annotation /// 0006810 // transport // inferred from electronic annotation /// 0006811 // ion transport // inferred from electronic annotation /// 0006813 // potassium ion transport // inferred from electron…	0005635 // nuclear envelope // inferred from electronic annotation /// 0005737 // cytoplasm // inferred from electronic annotation /// 0005886 // plasma membrane // inferred from electronic annotation /// 0005887 // integral to plasma membrane // inferred from electronic annotation /// 0008076 // voltage-gated potassium channel complex // traceable author statement /// 0016020 // membrane // infe…	0000155 // two-component sensor activity // inferred from electronic annotation /// 0004871 // signal transducer activity // inferred from electronic annotation /// 0005216 // ion channel activity // inferred from electronic annotation /// 0005242 // inward rectifier potassium channel activity // inferred from electronic annotation /// 0005244 // voltage-gated ion channel activity // inferred fro…	---
3079202	KCNH2	NM_000238 // KCNH2 // potassium voltage-gated channel, subfamily H (eag-related)	AGAATGTCC	3.34783	chr7:150646521-150675178 (-) // 88.73 // q36.1	0.575779	-0.796413	-1.73678	AA down vs CA	0000160 // two-component signal transduction system (phosphorelay) // inferred from electronic annotation /// 0006355 // regulation of transcription, DNA-dependent // inferred from electronic annotation /// 0006810 // transport // inferred from electronic annotation /// 0006811 // ion transport // inferred from electronic annotation /// 0006813 // potassium ion transport // inferred from electron…	0005635 // nuclear envelope // inferred from electronic annotation /// 0005737 // cytoplasm // inferred from electronic annotation /// 0005886 // plasma membrane // inferred from electronic annotation /// 0005887 // integral to plasma membrane // inferred from electronic annotation /// 0008076 // voltage-gated potassium channel complex // traceable author statement /// 0016020 // membrane // infe…	0000155 // two-component sensor activity // inferred from electronic annotation /// 0004871 // signal transducer activity // inferred from electronic annotation /// 0005216 // ion channel activity // inferred from electronic annotation /// 0005242 // inward rectifier potassium channel activity // inferred from electronic annotation /// 0005244 // voltage-gated ion channel activity // inferred fro…	---
2552051	KCNK12	NM_022055 // KCNK12 // potassium channel, subfamily K, member 12 // 2p16.3 // 56	GCGCTGTCC	4.24108	chr2:47747916-47797470 (-) // 92.75 // p21	0.576854	-0.793722	-1.73354	AA down vs CA	0006493 // protein O-linked glycosylation // inferred from electronic annotation /// 0006493 // protein O-linked glycosylation // traceable author statement /// 0006810 // transport // inferred from electronic annotation /// 0006811 // ion transport // inferred from electronic annotation /// 0006813 // potassium ion transport // inferred from electronic annotation /// 0018242 // protein O-linked …	0005576 // extracellular region // inferred from electronic annotation /// 0005794 // Golgi apparatus // inferred from direct assay /// 0005794 // Golgi apparatus // inferred from electronic annotation /// 0016020 // membrane // inferred from electronic annotation /// 0016021 // integral to membrane // inferred from electronic annotation /// 0032580 // Golgi cisterna membrane // inferred from ele…	0004653 // polypeptide N-acetylgalactosaminyltransferase activity // inferred from direct assay /// 0004653 // polypeptide N-acetylgalactosaminyltransferase activity // inferred from electronic annotation /// 0004653 // polypeptide N-acetylgalactosaminyltransferase activity // traceable author statement /// 0005216 // ion channel activity // inferred from electronic annotation /// 0005244 // volt…	---
2332091	KCNQ4	NM_004700 // KCNQ4 // potassium voltage-gated channel, KQT-like subfamily, membe	GGACACTGC	0.64936	chr1:41249683-41304360 (+) // 91.43 // p34.2	0.573543	-0.802026	-1.74355	AA down vs CA	0006810 // transport // inferred from electronic annotation /// 0006811 // ion transport // inferred from electronic annotation /// 0006813 // potassium ion transport // inferred from electronic annotation /// 0006813 // potassium ion transport // traceable author statement /// 0007605 // sensory perception of sound // inferred from electronic annotation /// 0007605 // sensory perception of sound…	0005737 // cytoplasm // inferred from electronic annotation /// 0005886 // plasma membrane // inferred from electronic annotation /// 0008076 // voltage-gated potassium channel complex // inferred from electronic annotation /// 0009925 // basal plasma membrane // inferred from electronic annotation /// 0016020 // membrane // inferred from electronic annotation /// 0016021 // integral to membrane …	0005216 // ion channel activity // inferred from electronic annotation /// 0005244 // voltage-gated ion channel activity // inferred from electronic annotation /// 0005249 // voltage-gated potassium channel activity // inferred from electronic annotation /// 0005267 // potassium channel activity // traceable author statement /// 0005267 // potassium channel activity // inferred from electronic an…	---
2328465	KHDRBS1	NM_006559 // KHDRBS1 // KH domain containing, RNA binding, signal transduction a	CGACTGTCC	2.91388	chr1:32479490-32509472 (+) // 98.92 // p35.1	1.927	0.946357	1.927	AA up vs CA	0000086 // G2/M transition of mitotic cell cycle // inferred from sequence or structural similarity /// 0006350 // transcription // inferred from electronic annotation /// 0006397 // mRNA processing // traceable author statement /// 0007049 // cell cycle // inferred from electronic annotation /// 0007050 // cell cycle arrest // traceable author statement /// 0007165 // signal transduction // trac…	0005634 // nucleus // inferred from direct assay /// 0005634 // nucleus // inferred from electronic annotation /// 0016020 // membrane // inferred from direct assay /// 0016020 // membrane // inferred from electronic annotation	0003677 // DNA binding // traceable author statement /// 0003723 // RNA binding // inferred from direct assay /// 0003723 // RNA binding // inferred from electronic annotation /// 0005070 // SH3/SH2 adaptor activity // inferred from physical interaction /// 0005070 // SH3/SH2 adaptor activity // inferred from electronic annotation /// 0005515 // protein binding // inferred from physical interacti…	---
2328465	KHDRBS1	NM_006559 // KHDRBS1 // KH domain containing, RNA binding, signal transduction a	CGACTGTCC	2.91388	chr1:32479482-32508536 (+) // 96.27 // p35.1	1.927	0.946357	1.927	AA up vs CA	0000086 // G2/M transition of mitotic cell cycle // inferred from sequence or structural similarity /// 0006350 // transcription // inferred from electronic annotation /// 0006397 // mRNA processing // traceable author statement /// 0007049 // cell cycle // inferred from electronic annotation /// 0007050 // cell cycle arrest // traceable author statement /// 0007165 // signal transduction // trac…	0005634 // nucleus // inferred from direct assay /// 0005634 // nucleus // inferred from electronic annotation /// 0016020 // membrane // inferred from direct assay /// 0016020 // membrane // inferred from electronic annotation	0003677 // DNA binding // traceable author statement /// 0003723 // RNA binding // inferred from direct assay /// 0003723 // RNA binding // inferred from electronic annotation /// 0005070 // SH3/SH2 adaptor activity // inferred from physical interaction /// 0005070 // SH3/SH2 adaptor activity // inferred from electronic annotation /// 0005515 // protein binding // inferred from physical interacti…	---
2328465	KHDRBS1	NM_006559 // KHDRBS1 // KH domain containing, RNA binding, signal transduction a	CGACTGTCC	2.91388	chr1:32479596-32526451 (+) // 97.92 // p35.1	1.927	0.946357	1.927	AA up vs CA	0000086 // G2/M transition of mitotic cell cycle // inferred from sequence or structural similarity /// 0006350 // transcription // inferred from electronic annotation /// 0006397 // mRNA processing // traceable author statement /// 0007049 // cell cycle // inferred from electronic annotation /// 0007050 // cell cycle arrest // traceable author statement /// 0007165 // signal transduction // trac…	0005634 // nucleus // inferred from direct assay /// 0005634 // nucleus // inferred from electronic annotation /// 0016020 // membrane // inferred from direct assay /// 0016020 // membrane // inferred from electronic annotation	0003677 // DNA binding // traceable author statement /// 0003723 // RNA binding // inferred from direct assay /// 0003723 // RNA binding // inferred from electronic annotation /// 0005070 // SH3/SH2 adaptor activity // inferred from physical interaction /// 0005070 // SH3/SH2 adaptor activity // inferred from electronic annotation /// 0005515 // protein binding // inferred from physical interacti…	---
3484895	KL	NM_004795 // KL // klotho // 13q12 // 9365 /// ENST00000380099 // KL // klotho /	GGACACTGT	2.37683	chr13:33590570-33640279 (+) // 93.28 // q13.1	0.486938	-1.03819	-2.05365	AA down vs CA	0002526 // acute inflammatory response // inferred from electronic annotation /// 0005975 // carbohydrate metabolic process // inferred from electronic annotation /// 0006112 // energy reserve metabolic process // inferred from electronic annotation /// 0007568 // aging // inferred from mutant phenotype /// 0007568 // aging // inferred from electronic annotation /// 0008152 // metabolic process /…	0005576 // extracellular region // not recorded /// 0005576 // extracellular region // inferred from electronic annotation /// 0005615 // extracellular space // traceable author statement /// 0005624 // membrane fraction // traceable author statement /// 0005625 // soluble fraction // traceable author statement /// 0005886 // plasma membrane // not recorded /// 0005886 // plasma membrane // infer…	0003824 // catalytic activity // inferred from electronic annotation /// 0004553 // hydrolase activity, hydrolyzing O-glycosyl compounds // inferred from electronic annotation /// 0004566 // beta-glucuronidase activity // inferred from electronic annotation /// 0004871 // signal transducer activity // traceable author statement /// 0005104 // fibroblast growth factor receptor binding // inferred …	---
3484895	KL	NM_004795 // KL // klotho // 13q12 // 9365 /// ENST00000380099 // KL // klotho /	GCAATGTCC	0.86582	chr13:33590570-33640279 (+) // 93.28 // q13.1	0.486938	-1.03819	-2.05365	AA down vs CA	0002526 // acute inflammatory response // inferred from electronic annotation /// 0005975 // carbohydrate metabolic process // inferred from electronic annotation /// 0006112 // energy reserve metabolic process // inferred from electronic annotation /// 0007568 // aging // inferred from mutant phenotype /// 0007568 // aging // inferred from electronic annotation /// 0008152 // metabolic process /…	0005576 // extracellular region // not recorded /// 0005576 // extracellular region // inferred from electronic annotation /// 0005615 // extracellular space // traceable author statement /// 0005624 // membrane fraction // traceable author statement /// 0005625 // soluble fraction // traceable author statement /// 0005886 // plasma membrane // not recorded /// 0005886 // plasma membrane // infer…	0003824 // catalytic activity // inferred from electronic annotation /// 0004553 // hydrolase activity, hydrolyzing O-glycosyl compounds // inferred from electronic annotation /// 0004566 // beta-glucuronidase activity // inferred from electronic annotation /// 0004871 // signal transducer activity // traceable author statement /// 0005104 // fibroblast growth factor receptor binding // inferred …	---
2452440	KLHDC8A	NM_018203 // KLHDC8A // kelch domain containing 8A // 1q32.1 // 55220 /// ENST00	GGACAGCCC	4.99562	chr1:205305647-205326039 (-) // 99.88 // q32.1	0.537228	-0.896394	-1.86141	AA down vs CA	---	---	---	---
3637367	KLHL25	NM_022480 // KLHL25 // kelch-like 25 (Drosophila) // 15q25.3 // 64410 /// ENST00	GGACATTTA	2.73561	chr15:86302560-86338100 (-) // 99.66 // q25.3	0.558898	-0.839343	-1.78923	AA down vs CA	---	0005737 // cytoplasm // inferred from direct assay	0005515 // protein binding // inferred from electronic annotation	---
2877028	KLHL3	NM_017415 // KLHL3 // kelch-like 3 (Drosophila) // 5q31 // 26249 /// ENST0000030	TAATTGTCC	2.51915	chr5:136953188-137071463 (-) // 96.68 // q31.2	0.557991	-0.841686	-1.79214	AA down vs CA	---	0005737 // cytoplasm // inferred from electronic annotation /// 0005856 // cytoskeleton // inferred from electronic annotation	0003779 // actin binding // inferred from electronic annotation /// 0005198 // structural molecule activity // traceable author statement /// 0005515 // protein binding // inferred from electronic annotation	---
3404496	KLRF1	NM_016523 // KLRF1 // killer cell lectin-like receptor subfamily F, member 1 //	GGACAGTTG	3.16539	chr12:9980076-9997601 (+) // 99.52 // p13.31	0.579031	-0.788288	-1.72702	AA down vs CA	0007166 // cell surface receptor linked signaling pathway // traceable author statement	0005887 // integral to plasma membrane // traceable author statement /// 0016020 // membrane // traceable author statement /// 0016020 // membrane // inferred from electronic annotation /// 0016021 // integral to membrane // inferred from electronic annotation	0004872 // receptor activity // inferred from electronic annotation /// 0004888 // transmembrane receptor activity // traceable author statement /// 0005488 // binding // inferred from electronic annotation /// 0005529 // sugar binding // inferred from electronic annotation /// 0032393 // MHC class I receptor activity // traceable author statement	---
3404496	KLRF1	NM_016523 // KLRF1 // killer cell lectin-like receptor subfamily F, member 1 //	GGACAATTT	3.38289	chr12:9980076-9997601 (+) // 99.52 // p13.31	0.579031	-0.788288	-1.72702	AA down vs CA	0007166 // cell surface receptor linked signaling pathway // traceable author statement	0005887 // integral to plasma membrane // traceable author statement /// 0016020 // membrane // traceable author statement /// 0016020 // membrane // inferred from electronic annotation /// 0016021 // integral to membrane // inferred from electronic annotation	0004872 // receptor activity // inferred from electronic annotation /// 0004888 // transmembrane receptor activity // traceable author statement /// 0005488 // binding // inferred from electronic annotation /// 0005529 // sugar binding // inferred from electronic annotation /// 0032393 // MHC class I receptor activity // traceable author statement	---
2691982	KPNA1	NR_026698 // KPNA1 // karyopherin alpha 1 (importin alpha 5) // 3q21 // 3836 ///	GGAATGTCC	1.62036	chr3:122140657-122233775 (-) // 94.8 // q21.1	1.77613	0.828737	1.77613	AA up vs CA	0000018 // regulation of DNA recombination // traceable author statement /// 0006606 // protein import into nucleus // inferred from electronic annotation /// 0006607 // NLS-bearing substrate import into nucleus // traceable author statement /// 0006810 // transport // inferred from electronic annotation /// 0006886 // intracellular protein transport // inferred from electronic annotation /// 001…	0005634 // nucleus // inferred from electronic annotation /// 0005643 // nuclear pore // inferred from electronic annotation /// 0005643 // nuclear pore // traceable author statement /// 0005654 // nucleoplasm // not recorded /// 0005737 // cytoplasm // inferred from electronic annotation /// 0005737 // cytoplasm // traceable author statement /// 0005829 // cytosol // not recorded	0005488 // binding // inferred from electronic annotation /// 0005515 // protein binding // inferred from physical interaction /// 0008139 // nuclear localization sequence binding // traceable author statement /// 0008565 // protein transporter activity // inferred from electronic annotation	---
2691982	KPNA1	NR_026698 // KPNA1 // karyopherin alpha 1 (importin alpha 5) // 3q21 // 3836 ///	GGAATGTCC	1.62036	chr3:122140657-122233775 (-) // 94.8 // q21.1	1.77613	0.828737	1.77613	AA up vs CA	0000018 // regulation of DNA recombination // traceable author statement /// 0006606 // protein import into nucleus // inferred from electronic annotation /// 0006607 // NLS-bearing substrate import into nucleus // traceable author statement /// 0006810 // transport // inferred from electronic annotation /// 0006886 // intracellular protein transport // inferred from electronic annotation /// 001…	0005634 // nucleus // inferred from electronic annotation /// 0005643 // nuclear pore // inferred from electronic annotation /// 0005643 // nuclear pore // traceable author statement /// 0005654 // nucleoplasm // not recorded /// 0005737 // cytoplasm // inferred from electronic annotation /// 0005737 // cytoplasm // traceable author statement /// 0005829 // cytosol // not recorded	0005488 // binding // inferred from electronic annotation /// 0005515 // protein binding // inferred from physical interaction /// 0008139 // nuclear localization sequence binding // traceable author statement /// 0008565 // protein transporter activity // inferred from electronic annotation	---
2691982	KPNA1	NR_026698 // KPNA1 // karyopherin alpha 1 (importin alpha 5) // 3q21 // 3836 ///	GGAATGTCC	1.62036	chr3:122140657-122233775 (-) // 94.8 // q21.1	1.77613	0.828737	1.77613	AA up vs CA	0000018 // regulation of DNA recombination // traceable author statement /// 0006606 // protein import into nucleus // inferred from electronic annotation /// 0006607 // NLS-bearing substrate import into nucleus // traceable author statement /// 0006810 // transport // inferred from electronic annotation /// 0006886 // intracellular protein transport // inferred from electronic annotation /// 001…	0005634 // nucleus // inferred from electronic annotation /// 0005643 // nuclear pore // inferred from electronic annotation /// 0005643 // nuclear pore // traceable author statement /// 0005654 // nucleoplasm // not recorded /// 0005737 // cytoplasm // inferred from electronic annotation /// 0005737 // cytoplasm // traceable author statement /// 0005829 // cytosol // not recorded	0005488 // binding // inferred from electronic annotation /// 0005515 // protein binding // inferred from physical interaction /// 0008139 // nuclear localization sequence binding // traceable author statement /// 0008565 // protein transporter activity // inferred from electronic annotation	---
2691982	KPNA1	NR_026698 // KPNA1 // karyopherin alpha 1 (importin alpha 5) // 3q21 // 3836 ///	GGAATGTCC	1.62036	chr3:122140657-122233775 (-) // 94.8 // q21.1	1.77613	0.828737	1.77613	AA up vs CA	0000018 // regulation of DNA recombination // traceable author statement /// 0006606 // protein import into nucleus // inferred from electronic annotation /// 0006607 // NLS-bearing substrate import into nucleus // traceable author statement /// 0006810 // transport // inferred from electronic annotation /// 0006886 // intracellular protein transport // inferred from electronic annotation /// 001…	0005634 // nucleus // inferred from electronic annotation /// 0005643 // nuclear pore // inferred from electronic annotation /// 0005643 // nuclear pore // traceable author statement /// 0005654 // nucleoplasm // not recorded /// 0005737 // cytoplasm // inferred from electronic annotation /// 0005737 // cytoplasm // traceable author statement /// 0005829 // cytosol // not recorded	0005488 // binding // inferred from electronic annotation /// 0005515 // protein binding // inferred from physical interaction /// 0008139 // nuclear localization sequence binding // traceable author statement /// 0008565 // protein transporter activity // inferred from electronic annotation	---
2691982	KPNA1	NR_026698 // KPNA1 // karyopherin alpha 1 (importin alpha 5) // 3q21 // 3836 ///	GGAATGTCC	1.62036	chr3:122140657-122233775 (-) // 94.8 // q21.1	1.77613	0.828737	1.77613	AA up vs CA	0000018 // regulation of DNA recombination // traceable author statement /// 0006606 // protein import into nucleus // inferred from electronic annotation /// 0006607 // NLS-bearing substrate import into nucleus // traceable author statement /// 0006810 // transport // inferred from electronic annotation /// 0006886 // intracellular protein transport // inferred from electronic annotation /// 001…	0005634 // nucleus // inferred from electronic annotation /// 0005643 // nuclear pore // inferred from electronic annotation /// 0005643 // nuclear pore // traceable author statement /// 0005654 // nucleoplasm // not recorded /// 0005737 // cytoplasm // inferred from electronic annotation /// 0005737 // cytoplasm // traceable author statement /// 0005829 // cytosol // not recorded	0005488 // binding // inferred from electronic annotation /// 0005515 // protein binding // inferred from physical interaction /// 0008139 // nuclear localization sequence binding // traceable author statement /// 0008565 // protein transporter activity // inferred from electronic annotation	---
2691982	KPNA1	NR_026698 // KPNA1 // karyopherin alpha 1 (importin alpha 5) // 3q21 // 3836 ///	GGAATGTCC	1.62036	chr3:122140657-122233775 (-) // 94.8 // q21.1	1.77613	0.828737	1.77613	AA up vs CA	0000018 // regulation of DNA recombination // traceable author statement /// 0006606 // protein import into nucleus // inferred from electronic annotation /// 0006607 // NLS-bearing substrate import into nucleus // traceable author statement /// 0006810 // transport // inferred from electronic annotation /// 0006886 // intracellular protein transport // inferred from electronic annotation /// 001…	0005634 // nucleus // inferred from electronic annotation /// 0005643 // nuclear pore // inferred from electronic annotation /// 0005643 // nuclear pore // traceable author statement /// 0005654 // nucleoplasm // not recorded /// 0005737 // cytoplasm // inferred from electronic annotation /// 0005737 // cytoplasm // traceable author statement /// 0005829 // cytosol // not recorded	0005488 // binding // inferred from electronic annotation /// 0005515 // protein binding // inferred from physical interaction /// 0008139 // nuclear localization sequence binding // traceable author statement /// 0008565 // protein transporter activity // inferred from electronic annotation	---
2691982	KPNA1	NR_026698 // KPNA1 // karyopherin alpha 1 (importin alpha 5) // 3q21 // 3836 ///	GGAATGTCC	1.62036	chr3:122145616-122233775 (-) // 98.53 // q21.1	1.77613	0.828737	1.77613	AA up vs CA	0000018 // regulation of DNA recombination // traceable author statement /// 0006606 // protein import into nucleus // inferred from electronic annotation /// 0006607 // NLS-bearing substrate import into nucleus // traceable author statement /// 0006810 // transport // inferred from electronic annotation /// 0006886 // intracellular protein transport // inferred from electronic annotation /// 001…	0005634 // nucleus // inferred from electronic annotation /// 0005643 // nuclear pore // inferred from electronic annotation /// 0005643 // nuclear pore // traceable author statement /// 0005654 // nucleoplasm // not recorded /// 0005737 // cytoplasm // inferred from electronic annotation /// 0005737 // cytoplasm // traceable author statement /// 0005829 // cytosol // not recorded	0005488 // binding // inferred from electronic annotation /// 0005515 // protein binding // inferred from physical interaction /// 0008139 // nuclear localization sequence binding // traceable author statement /// 0008565 // protein transporter activity // inferred from electronic annotation	---
2691982	KPNA1	NR_026698 // KPNA1 // karyopherin alpha 1 (importin alpha 5) // 3q21 // 3836 ///	GGAATGTCC	1.62036	chr3:122145616-122233775 (-) // 98.53 // q21.1	1.77613	0.828737	1.77613	AA up vs CA	0000018 // regulation of DNA recombination // traceable author statement /// 0006606 // protein import into nucleus // inferred from electronic annotation /// 0006607 // NLS-bearing substrate import into nucleus // traceable author statement /// 0006810 // transport // inferred from electronic annotation /// 0006886 // intracellular protein transport // inferred from electronic annotation /// 001…	0005634 // nucleus // inferred from electronic annotation /// 0005643 // nuclear pore // inferred from electronic annotation /// 0005643 // nuclear pore // traceable author statement /// 0005654 // nucleoplasm // not recorded /// 0005737 // cytoplasm // inferred from electronic annotation /// 0005737 // cytoplasm // traceable author statement /// 0005829 // cytosol // not recorded	0005488 // binding // inferred from electronic annotation /// 0005515 // protein binding // inferred from physical interaction /// 0008139 // nuclear localization sequence binding // traceable author statement /// 0008565 // protein transporter activity // inferred from electronic annotation	---
2691982	KPNA1	NR_026698 // KPNA1 // karyopherin alpha 1 (importin alpha 5) // 3q21 // 3836 ///	GGAATGTCC	1.62036	chr3:122144526-122233645 (-) // 97.99 // q21.1	1.77613	0.828737	1.77613	AA up vs CA	0000018 // regulation of DNA recombination // traceable author statement /// 0006606 // protein import into nucleus // inferred from electronic annotation /// 0006607 // NLS-bearing substrate import into nucleus // traceable author statement /// 0006810 // transport // inferred from electronic annotation /// 0006886 // intracellular protein transport // inferred from electronic annotation /// 001…	0005634 // nucleus // inferred from electronic annotation /// 0005643 // nuclear pore // inferred from electronic annotation /// 0005643 // nuclear pore // traceable author statement /// 0005654 // nucleoplasm // not recorded /// 0005737 // cytoplasm // inferred from electronic annotation /// 0005737 // cytoplasm // traceable author statement /// 0005829 // cytosol // not recorded	0005488 // binding // inferred from electronic annotation /// 0005515 // protein binding // inferred from physical interaction /// 0008139 // nuclear localization sequence binding // traceable author statement /// 0008565 // protein transporter activity // inferred from electronic annotation	---
2691982	KPNA1	NR_026698 // KPNA1 // karyopherin alpha 1 (importin alpha 5) // 3q21 // 3836 ///	GGAATGTCC	1.62036	chr3:122144526-122233645 (-) // 97.99 // q21.1	1.77613	0.828737	1.77613	AA up vs CA	0000018 // regulation of DNA recombination // traceable author statement /// 0006606 // protein import into nucleus // inferred from electronic annotation /// 0006607 // NLS-bearing substrate import into nucleus // traceable author statement /// 0006810 // transport // inferred from electronic annotation /// 0006886 // intracellular protein transport // inferred from electronic annotation /// 001…	0005634 // nucleus // inferred from electronic annotation /// 0005643 // nuclear pore // inferred from electronic annotation /// 0005643 // nuclear pore // traceable author statement /// 0005654 // nucleoplasm // not recorded /// 0005737 // cytoplasm // inferred from electronic annotation /// 0005737 // cytoplasm // traceable author statement /// 0005829 // cytosol // not recorded	0005488 // binding // inferred from electronic annotation /// 0005515 // protein binding // inferred from physical interaction /// 0008139 // nuclear localization sequence binding // traceable author statement /// 0008565 // protein transporter activity // inferred from electronic annotation	---
2691982	KPNA1	NR_026698 // KPNA1 // karyopherin alpha 1 (importin alpha 5) // 3q21 // 3836 ///	GGAATGTCC	1.62036	chr3:122144525-122182888 (-) // 93.65 // q21.1	1.77613	0.828737	1.77613	AA up vs CA	0000018 // regulation of DNA recombination // traceable author statement /// 0006606 // protein import into nucleus // inferred from electronic annotation /// 0006607 // NLS-bearing substrate import into nucleus // traceable author statement /// 0006810 // transport // inferred from electronic annotation /// 0006886 // intracellular protein transport // inferred from electronic annotation /// 001…	0005634 // nucleus // inferred from electronic annotation /// 0005643 // nuclear pore // inferred from electronic annotation /// 0005643 // nuclear pore // traceable author statement /// 0005654 // nucleoplasm // not recorded /// 0005737 // cytoplasm // inferred from electronic annotation /// 0005737 // cytoplasm // traceable author statement /// 0005829 // cytosol // not recorded	0005488 // binding // inferred from electronic annotation /// 0005515 // protein binding // inferred from physical interaction /// 0008139 // nuclear localization sequence binding // traceable author statement /// 0008565 // protein transporter activity // inferred from electronic annotation	---
2691982	KPNA1	NR_026698 // KPNA1 // karyopherin alpha 1 (importin alpha 5) // 3q21 // 3836 ///	GGAATGTCC	1.62036	chr3:122144525-122182888 (-) // 93.65 // q21.1	1.77613	0.828737	1.77613	AA up vs CA	0000018 // regulation of DNA recombination // traceable author statement /// 0006606 // protein import into nucleus // inferred from electronic annotation /// 0006607 // NLS-bearing substrate import into nucleus // traceable author statement /// 0006810 // transport // inferred from electronic annotation /// 0006886 // intracellular protein transport // inferred from electronic annotation /// 001…	0005634 // nucleus // inferred from electronic annotation /// 0005643 // nuclear pore // inferred from electronic annotation /// 0005643 // nuclear pore // traceable author statement /// 0005654 // nucleoplasm // not recorded /// 0005737 // cytoplasm // inferred from electronic annotation /// 0005737 // cytoplasm // traceable author statement /// 0005829 // cytosol // not recorded	0005488 // binding // inferred from electronic annotation /// 0005515 // protein binding // inferred from physical interaction /// 0008139 // nuclear localization sequence binding // traceable author statement /// 0008565 // protein transporter activity // inferred from electronic annotation	---
3756979	KRT38	NM_006771 // KRT38 // keratin 38 // 17q12-q21 // 8687 /// NM_003770 // KRT37 //	TCAATGTCC	1.72955	chr17:39592620-39597596 (-) // 94.04 // q21.2	0.562368	-0.830414	-1.7782	AA down vs CA	---	0005882 // intermediate filament // inferred from electronic annotation	0005198 // structural molecule activity // inferred from electronic annotation /// 0005198 // structural molecule activity // traceable author statement	---
2404158	LAPTM5	NM_006762 // LAPTM5 // lysosomal protein transmembrane 5 // 1p34 // 7805 /// ENS	GGTCTGTCC	4.99562	chr1:31205315-31230673 (-) // 97.25 // p35.2	1.72944	0.790305	1.72944	AA up vs CA	0006810 // transport // inferred from electronic annotation	0005764 // lysosome // traceable author statement /// 0005764 // lysosome // inferred from electronic annotation /// 0005765 // lysosomal membrane // inferred from electronic annotation /// 0005887 // integral to plasma membrane // inferred from electronic annotation /// 0005887 // integral to plasma membrane // traceable author statement /// 0016020 // membrane // inferred from electronic annota…	---	---
2404158	LAPTM5	NM_006762 // LAPTM5 // lysosomal protein transmembrane 5 // 1p34 // 7805 /// ENS	GCCCTGTCC	4.94793	chr1:31205315-31230673 (-) // 97.25 // p35.2	1.72944	0.790305	1.72944	AA up vs CA	0006810 // transport // inferred from electronic annotation	0005764 // lysosome // traceable author statement /// 0005764 // lysosome // inferred from electronic annotation /// 0005765 // lysosomal membrane // inferred from electronic annotation /// 0005887 // integral to plasma membrane // inferred from electronic annotation /// 0005887 // integral to plasma membrane // traceable author statement /// 0016020 // membrane // inferred from electronic annota…	---	---
2404158	LAPTM5	NM_006762 // LAPTM5 // lysosomal protein transmembrane 5 // 1p34 // 7805 /// ENS	GGTCTGTCC	4.99562	chr1:31205315-31230667 (-) // 99.51 // p35.2	1.72944	0.790305	1.72944	AA up vs CA	0006810 // transport // inferred from electronic annotation	0005764 // lysosome // traceable author statement /// 0005764 // lysosome // inferred from electronic annotation /// 0005765 // lysosomal membrane // inferred from electronic annotation /// 0005887 // integral to plasma membrane // inferred from electronic annotation /// 0005887 // integral to plasma membrane // traceable author statement /// 0016020 // membrane // inferred from electronic annota…	---	---
2404158	LAPTM5	NM_006762 // LAPTM5 // lysosomal protein transmembrane 5 // 1p34 // 7805 /// ENS	GCCCTGTCC	4.94793	chr1:31205315-31230667 (-) // 99.51 // p35.2	1.72944	0.790305	1.72944	AA up vs CA	0006810 // transport // inferred from electronic annotation	0005764 // lysosome // traceable author statement /// 0005764 // lysosome // inferred from electronic annotation /// 0005765 // lysosomal membrane // inferred from electronic annotation /// 0005887 // integral to plasma membrane // inferred from electronic annotation /// 0005887 // integral to plasma membrane // traceable author statement /// 0016020 // membrane // inferred from electronic annota…	---	---
2757427	LETM1	NM_012318 // LETM1 // leucine zipper-EF-hand containing transmembrane protein 1	GCCCTGTCC	4.94793	chr4:1814759-1857974 (-) // 96.95 // p16.3	1.74873	0.806308	1.74873	AA up vs CA	0042407 // cristae formation // inferred from mutant phenotype	0005739 // mitochondrion // inferred from direct assay /// 0005739 // mitochondrion // inferred from sequence or structural similarity /// 0005739 // mitochondrion // inferred from electronic annotation /// 0005743 // mitochondrial inner membrane // inferred from direct assay /// 0005743 // mitochondrial inner membrane // inferred from electronic annotation /// 0016020 // membrane // inferred fro…	0005509 // calcium ion binding // inferred from electronic annotation /// 0005509 // calcium ion binding // traceable author statement /// 0005515 // protein binding // inferred from physical interaction	---
2757427	LETM1	NM_012318 // LETM1 // leucine zipper-EF-hand containing transmembrane protein 1	GCCCTGTCC	4.94793	chr4:1813205-1813866 (-) // 51.06 // p16.3	1.74873	0.806308	1.74873	AA up vs CA	0042407 // cristae formation // inferred from mutant phenotype	0005739 // mitochondrion // inferred from direct assay /// 0005739 // mitochondrion // inferred from sequence or structural similarity /// 0005739 // mitochondrion // inferred from electronic annotation /// 0005743 // mitochondrial inner membrane // inferred from direct assay /// 0005743 // mitochondrial inner membrane // inferred from electronic annotation /// 0016020 // membrane // inferred fro…	0005509 // calcium ion binding // inferred from electronic annotation /// 0005509 // calcium ion binding // traceable author statement /// 0005515 // protein binding // inferred from physical interaction	---
2949299	LY6G6C	NM_025261 // LY6G6C // lymphocyte antigen 6 complex, locus G6C // 6p21.33 // 807	GGACACTGT	2.37683	chr6:31686424-31689510 (-) // 99.66 // p21.33	0.578447	-0.789743	-1.72877	AA down vs CA	---	0005886 // plasma membrane // inferred from electronic annotation /// 0016020 // membrane // inferred from electronic annotation /// 0031225 // anchored to membrane // inferred from electronic annotation	---	---
2949299	LY6G6C	NM_025261 // LY6G6C // lymphocyte antigen 6 complex, locus G6C // 6p21.33 // 807	GGACAATTG	3.81475	chr6:31686424-31689510 (-) // 99.66 // p21.33	0.578447	-0.789743	-1.72877	AA down vs CA	---	0005886 // plasma membrane // inferred from electronic annotation /// 0016020 // membrane // inferred from electronic annotation /// 0031225 // anchored to membrane // inferred from electronic annotation	---	---
3753935	LYZL6	NM_020426 // LYZL6 // lysozyme-like 6 // 17q11.2 // 57151 /// ENST00000293274 //	GGACATTTA	2.73561	chr17:34261524-34266510 (-) // 100.0 // q12	0.525981	-0.926917	-1.90121	AA down vs CA	0008152 // metabolic process // inferred from electronic annotation /// 0016998 // cell wall macromolecule catabolic process // inferred from electronic annotation	0005576 // extracellular region // inferred from electronic annotation	0003796 // lysozyme activity // inferred from electronic annotation /// 0016787 // hydrolase activity // inferred from electronic annotation /// 0016798 // hydrolase activity, acting on glycosyl bonds // inferred from electronic annotation	---
3994710	MAMLD1	NM_005491 // MAMLD1 // mastermind-like domain containing 1 // Xq28 // 10046 ///	GAATTGTCC	1.65542	chrX:149613719-149682439 (+) // 95.11 // q28	0.57346	-0.802235	-1.7438	AA down vs CA	0006350 // transcription // inferred from electronic annotation /// 0008584 // male gonad development // inferred from expression pattern /// 0045449 // regulation of transcription // inferred from electronic annotation	0005634 // nucleus // inferred from electronic annotation	---	---
2376922	MAPKAPK2	NM_004759 // MAPKAPK2 // mitogen-activated protein kinase-activated protein kina	TCACTGTCC	0.86373	chr1:206858288-206907628 (+) // 83.91 // q32.1	1.78126	0.832898	1.78126	AA up vs CA	0000165 // MAPKKK cascade // traceable author statement /// 0006468 // protein phosphorylation // inferred from electronic annotation /// 0006468 // protein phosphorylation // traceable author statement /// 0007265 // Ras protein signal transduction // not recorded /// 0023034 // intracellular signaling pathway // not recorded /// 0048255 // mRNA stabilization // inferred from electronic annotati…	0005634 // nucleus // inferred from electronic annotation /// 0005634 // nucleus // traceable author statement /// 0005737 // cytoplasm // inferred from electronic annotation /// 0005829 // cytosol // not recorded	0000166 // nucleotide binding // inferred from electronic annotation /// 0004672 // protein kinase activity // traceable author statement /// 0004672 // protein kinase activity // inferred from electronic annotation /// 0004674 // protein serine/threonine kinase activity // inferred from electronic annotation /// 0004674 // protein serine/threonine kinase activity // traceable author statement //…	---
2376922	MAPKAPK2	NM_004759 // MAPKAPK2 // mitogen-activated protein kinase-activated protein kina	TCACTGTCC	0.86373	chr1:206858288-206906208 (+) // 77.5 // q32.1	1.78126	0.832898	1.78126	AA up vs CA	0000165 // MAPKKK cascade // traceable author statement /// 0006468 // protein phosphorylation // inferred from electronic annotation /// 0006468 // protein phosphorylation // traceable author statement /// 0007265 // Ras protein signal transduction // not recorded /// 0023034 // intracellular signaling pathway // not recorded /// 0048255 // mRNA stabilization // inferred from electronic annotati…	0005634 // nucleus // inferred from electronic annotation /// 0005634 // nucleus // traceable author statement /// 0005737 // cytoplasm // inferred from electronic annotation /// 0005829 // cytosol // not recorded	0000166 // nucleotide binding // inferred from electronic annotation /// 0004672 // protein kinase activity // traceable author statement /// 0004672 // protein kinase activity // inferred from electronic annotation /// 0004674 // protein serine/threonine kinase activity // inferred from electronic annotation /// 0004674 // protein serine/threonine kinase activity // traceable author statement //…	---
2376922	MAPKAPK2	NM_004759 // MAPKAPK2 // mitogen-activated protein kinase-activated protein kina	TCACTGTCC	0.86373	chr1:206858586-206906610 (+) // 92.53 // q32.1	1.78126	0.832898	1.78126	AA up vs CA	0000165 // MAPKKK cascade // traceable author statement /// 0006468 // protein phosphorylation // inferred from electronic annotation /// 0006468 // protein phosphorylation // traceable author statement /// 0007265 // Ras protein signal transduction // not recorded /// 0023034 // intracellular signaling pathway // not recorded /// 0048255 // mRNA stabilization // inferred from electronic annotati…	0005634 // nucleus // inferred from electronic annotation /// 0005634 // nucleus // traceable author statement /// 0005737 // cytoplasm // inferred from electronic annotation /// 0005829 // cytosol // not recorded	0000166 // nucleotide binding // inferred from electronic annotation /// 0004672 // protein kinase activity // traceable author statement /// 0004672 // protein kinase activity // inferred from electronic annotation /// 0004674 // protein serine/threonine kinase activity // inferred from electronic annotation /// 0004674 // protein serine/threonine kinase activity // traceable author statement //…	---
2922215	MARCKS	NM_002356 // MARCKS // myristoylated alanine-rich protein kinase C substrate //	GGACATTAA	2.73561	chr6:114178526-114182981 (+) // 84.0 // q21	1.85785	0.893634	1.85785	AA up vs CA	---	0005737 // cytoplasm // inferred from electronic annotation /// 0005813 // centrosome // inferred from electronic annotation /// 0005856 // cytoskeleton // inferred from electronic annotation /// 0005938 // cell cortex // inferred from electronic annotation /// 0015629 // actin cytoskeleton // traceable author statement /// 0016020 // membrane // inferred from electronic annotation /// 0042585 //…	0003779 // actin binding // inferred from electronic annotation /// 0005080 // protein kinase C binding // inferred from electronic annotation /// 0005516 // calmodulin binding // inferred from electronic annotation /// 0005516 // calmodulin binding // traceable author statement /// 0051015 // actin filament binding // traceable author statement	---
2922215	MARCKS	NM_002356 // MARCKS // myristoylated alanine-rich protein kinase C substrate //	GGACATTAA	2.73561	chr6:114178555-114182980 (+) // 89.65 // q21 /// chr21:27607157-27608233 (-) // 40.25 // q21.3	1.85785	0.893634	1.85785	AA up vs CA	---	0005737 // cytoplasm // inferred from electronic annotation /// 0005813 // centrosome // inferred from electronic annotation /// 0005856 // cytoskeleton // inferred from electronic annotation /// 0005938 // cell cortex // inferred from electronic annotation /// 0015629 // actin cytoskeleton // traceable author statement /// 0016020 // membrane // inferred from electronic annotation /// 0042585 //…	0003779 // actin binding // inferred from electronic annotation /// 0005080 // protein kinase C binding // inferred from electronic annotation /// 0005516 // calmodulin binding // inferred from electronic annotation /// 0005516 // calmodulin binding // traceable author statement /// 0051015 // actin filament binding // traceable author statement	---
2922215	MARCKS	NM_002356 // MARCKS // myristoylated alanine-rich protein kinase C substrate //	GGACATTAA	2.73561	chr6:114178616-114182318 (+) // 84.62 // q21	1.85785	0.893634	1.85785	AA up vs CA	---	0005737 // cytoplasm // inferred from electronic annotation /// 0005813 // centrosome // inferred from electronic annotation /// 0005856 // cytoskeleton // inferred from electronic annotation /// 0005938 // cell cortex // inferred from electronic annotation /// 0015629 // actin cytoskeleton // traceable author statement /// 0016020 // membrane // inferred from electronic annotation /// 0042585 //…	0003779 // actin binding // inferred from electronic annotation /// 0005080 // protein kinase C binding // inferred from electronic annotation /// 0005516 // calmodulin binding // inferred from electronic annotation /// 0005516 // calmodulin binding // traceable author statement /// 0051015 // actin filament binding // traceable author statement	---
2922215	MARCKS	NM_002356 // MARCKS // myristoylated alanine-rich protein kinase C substrate //	GGACATTAA	2.73561	chr6:114181655-114182980 (-) // 100.0 // q21	1.85785	0.893634	1.85785	AA up vs CA	---	0005737 // cytoplasm // inferred from electronic annotation /// 0005813 // centrosome // inferred from electronic annotation /// 0005938 // cell cortex // inferred from electronic annotation /// 0015629 // actin cytoskeleton // traceable author statement /// 0016020 // membrane // inferred from electronic annotation /// 0042585 // germinal vesicle // inferred from electronic annotation	0005080 // protein kinase C binding // inferred from electronic annotation /// 0005516 // calmodulin binding // inferred from electronic annotation /// 0051015 // actin filament binding // traceable author statement	---
2934274	MAS1	NM_002377 // MAS1 // MAS1 oncogene // 6q25.3-q26 // 4142 /// ENST00000252660 //	CCATTGTCC	2.8087	chr6:160327973-160329108 (+) // 100.0 // q25.3	0.575975	-0.795922	-1.73619	AA down vs CA	0001933 // negative regulation of protein phosphorylation // inferred from electronic annotation /// 0007165 // signal transduction // inferred from electronic annotation /// 0007186 // G-protein coupled receptor protein signaling pathway // traceable author statement /// 0007186 // G-protein coupled receptor protein signaling pathway // inferred from electronic annotation /// 0007283 // spermato…	0005886 // plasma membrane // inferred from direct assay /// 0005886 // plasma membrane // inferred from electronic annotation /// 0005887 // integral to plasma membrane // traceable author statement /// 0009986 // cell surface // inferred from electronic annotation /// 0016020 // membrane // inferred from electronic annotation /// 0016021 // integral to membrane // inferred from electronic annot…	0001595 // angiotensin receptor activity // inferred from sequence or structural similarity /// 0001595 // angiotensin receptor activity // inferred from electronic annotation /// 0004871 // signal transducer activity // inferred from electronic annotation /// 0004872 // receptor activity // inferred from electronic annotation /// 0004930 // G-protein coupled receptor activity // inferred from di…	GPCRDB_Class_A_Rhodopsin-like // GenMAPP
2831124	MATR3	NM_199189 // MATR3 // matrin 3 // 5q31.2 // 9782 /// NM_001194954 // MATR3 // ma	GGACAATTA	2.51915	chr5:138629379-138666533 (+) // 97.32 // q31.2	1.7858	0.836571	1.7858	AA up vs CA	---	0005622 // intracellular // inferred from electronic annotation /// 0005634 // nucleus // inferred from electronic annotation /// 0005637 // nuclear inner membrane // traceable author statement /// 0016363 // nuclear matrix // inferred from electronic annotation	0000166 // nucleotide binding // inferred from electronic annotation /// 0003676 // nucleic acid binding // inferred from electronic annotation /// 0003723 // RNA binding // inferred from electronic annotation /// 0005198 // structural molecule activity // traceable author statement /// 0005515 // protein binding // inferred from physical interaction /// 0008270 // zinc ion binding // inferred fr…	---
2831124	MATR3	NM_199189 // MATR3 // matrin 3 // 5q31.2 // 9782 /// NM_001194954 // MATR3 // ma	GGACAATTA	2.51915	chr5:138642851-138666098 (+) // 98.02 // q31.2	1.7858	0.836571	1.7858	AA up vs CA	---	0005622 // intracellular // inferred from electronic annotation /// 0005634 // nucleus // inferred from electronic annotation /// 0005637 // nuclear inner membrane // traceable author statement /// 0016363 // nuclear matrix // inferred from electronic annotation	0000166 // nucleotide binding // inferred from electronic annotation /// 0003676 // nucleic acid binding // inferred from electronic annotation /// 0003723 // RNA binding // inferred from electronic annotation /// 0005198 // structural molecule activity // traceable author statement /// 0005515 // protein binding // inferred from physical interaction /// 0008270 // zinc ion binding // inferred fr…	---
2831124	MATR3	NM_199189 // MATR3 // matrin 3 // 5q31.2 // 9782 /// NM_001194954 // MATR3 // ma	GGACAATTA	2.51915	chr5:138665805-138666126 (+) // 93.04 // q31.2	1.7858	0.836571	1.7858	AA up vs CA	---	0005622 // intracellular // inferred from electronic annotation /// 0005634 // nucleus // inferred from electronic annotation /// 0005637 // nuclear inner membrane // traceable author statement /// 0016363 // nuclear matrix // inferred from electronic annotation	0000166 // nucleotide binding // inferred from electronic annotation /// 0003676 // nucleic acid binding // inferred from electronic annotation /// 0003723 // RNA binding // inferred from electronic annotation /// 0005198 // structural molecule activity // traceable author statement /// 0005515 // protein binding // inferred from physical interaction /// 0008270 // zinc ion binding // inferred fr…	---
3702293	MBTPS1	NM_003791 // MBTPS1 // membrane-bound transcription factor peptidase, site 1 //	GGACACTTC	1.65542	chr16:84087370-84150511 (-) // 99.98 // q23.3	1.74367	0.802127	1.74367	AA up vs CA	0006508 // proteolysis // inferred from electronic annotation /// 0006508 // proteolysis // traceable author statement /// 0006629 // lipid metabolic process // inferred from electronic annotation /// 0008202 // steroid metabolic process // inferred from electronic annotation /// 0008203 // cholesterol metabolic process // inferred from electronic annotation /// 0042990 // regulation of transcrip…	0000139 // Golgi membrane // inferred from electronic annotation /// 0005634 // nucleus // inferred from direct assay /// 0005783 // endoplasmic reticulum // inferred from direct assay /// 0005783 // endoplasmic reticulum // inferred from electronic annotation /// 0005788 // endoplasmic reticulum lumen // traceable author statement /// 0005789 // endoplasmic reticulum membrane // inferred from el…	0004175 // endopeptidase activity // inferred from electronic annotation /// 0004252 // serine-type endopeptidase activity // inferred from electronic annotation /// 0004252 // serine-type endopeptidase activity // traceable author statement /// 0008233 // peptidase activity // inferred from electronic annotation /// 0008236 // serine-type peptidase activity // inferred from electronic annotation…	---
3702293	MBTPS1	NM_003791 // MBTPS1 // membrane-bound transcription factor peptidase, site 1 //	GGACACTTC	1.65542	chr16:84092973-84095209 (-) // 71.51 // q23.3	1.74367	0.802127	1.74367	AA up vs CA	0006508 // proteolysis // inferred from electronic annotation /// 0006508 // proteolysis // traceable author statement /// 0006629 // lipid metabolic process // inferred from electronic annotation /// 0008202 // steroid metabolic process // inferred from electronic annotation /// 0008203 // cholesterol metabolic process // inferred from electronic annotation /// 0042990 // regulation of transcrip…	0000139 // Golgi membrane // inferred from electronic annotation /// 0005634 // nucleus // inferred from direct assay /// 0005783 // endoplasmic reticulum // inferred from direct assay /// 0005783 // endoplasmic reticulum // inferred from electronic annotation /// 0005788 // endoplasmic reticulum lumen // traceable author statement /// 0005789 // endoplasmic reticulum membrane // inferred from el…	0004175 // endopeptidase activity // inferred from electronic annotation /// 0004252 // serine-type endopeptidase activity // inferred from electronic annotation /// 0004252 // serine-type endopeptidase activity // traceable author statement /// 0008233 // peptidase activity // inferred from electronic annotation /// 0008236 // serine-type peptidase activity // inferred from electronic annotation…	---
3063685	MCM7	NM_005916 // MCM7 // minichromosome maintenance complex component 7 // 7q21.3-q2	GCGGTGTCC	4.89044	chr7:99690403-99699033 (-) // 99.96 // q22.1	1.75067	0.807907	1.75067	AA up vs CA	0006260 // DNA replication // not recorded /// 0006260 // DNA replication // inferred from electronic annotation /// 0006260 // DNA replication // traceable author statement /// 0006268 // DNA unwinding involved in replication // inferred from electronic annotation /// 0006270 // DNA-dependent DNA replication initiation // inferred from electronic annotation /// 0006350 // transcription // inferr…	0000785 // chromatin // traceable author statement /// 0005634 // nucleus // inferred from direct assay /// 0005634 // nucleus // inferred from electronic annotation /// 0005654 // nucleoplasm // not recorded /// 0005737 // cytoplasm // inferred from direct assay /// 0042555 // MCM complex // inferred from mutant phenotype	0000166 // nucleotide binding // inferred from electronic annotation /// 0003677 // DNA binding // traceable author statement /// 0003677 // DNA binding // inferred from electronic annotation /// 0003678 // DNA helicase activity // inferred from electronic annotation /// 0003697 // single-stranded DNA binding // inferred from electronic annotation /// 0005515 // protein binding // inferred from p…	Cell_cycle_KEGG // GenMAPP /// DNA_replication_Reactome // GenMAPP /// G1_to_S_cell_cycle_Reactome // GenMAPP
3063685	MCM7	NM_005916 // MCM7 // minichromosome maintenance complex component 7 // 7q21.3-q2	GCGGTGTCC	4.89044	chr7:99690918-99697360 (-) // 96.03 // q22.1	1.75067	0.807907	1.75067	AA up vs CA	0006260 // DNA replication // not recorded /// 0006260 // DNA replication // inferred from electronic annotation /// 0006260 // DNA replication // traceable author statement /// 0006268 // DNA unwinding involved in replication // inferred from electronic annotation /// 0006270 // DNA-dependent DNA replication initiation // inferred from electronic annotation /// 0006350 // transcription // inferr…	0000785 // chromatin // traceable author statement /// 0005634 // nucleus // inferred from direct assay /// 0005634 // nucleus // inferred from electronic annotation /// 0005654 // nucleoplasm // not recorded /// 0005737 // cytoplasm // inferred from direct assay /// 0042555 // MCM complex // inferred from mutant phenotype	0000166 // nucleotide binding // inferred from electronic annotation /// 0003677 // DNA binding // traceable author statement /// 0003677 // DNA binding // inferred from electronic annotation /// 0003678 // DNA helicase activity // inferred from electronic annotation /// 0003697 // single-stranded DNA binding // inferred from electronic annotation /// 0005515 // protein binding // inferred from p…	Cell_cycle_KEGG // GenMAPP /// DNA_replication_Reactome // GenMAPP /// G1_to_S_cell_cycle_Reactome // GenMAPP
2420681	MCOLN3	NM_018298 // MCOLN3 // mucolipin 3 // 1p22.3 // 55283 /// ENST00000302814 // MCO	CGACTGTCC	2.91388	chr1:85484590-85514129 (-) // 99.89 // p22.3	0.544679	-0.876522	-1.83594	AA down vs CA	0006810 // transport // inferred from electronic annotation /// 0006811 // ion transport // inferred from electronic annotation /// 0007626 // locomotory behavior // inferred from electronic annotation /// 0042491 // auditory receptor cell differentiation // inferred from electronic annotation	0005737 // cytoplasm // inferred from electronic annotation /// 0005886 // plasma membrane // inferred from electronic annotation /// 0016020 // membrane // inferred from electronic annotation /// 0016021 // integral to membrane // inferred from electronic annotation	0005216 // ion channel activity // inferred from electronic annotation	---
3461164	MDM1	NM_017440 // MDM1 // Mdm1 nuclear protein homolog (mouse) // 12q15 // 56890 ///	GGACAATTT	3.38289	chr12:68688345-68715402 (-) // 97.97 // q15	0.455427	-1.13471	-2.19574	AA down vs CA	---	0005634 // nucleus // inferred from electronic annotation	---	---
3461164	MDM1	NM_017440 // MDM1 // Mdm1 nuclear protein homolog (mouse) // 12q15 // 56890 ///	GGACAATTT	3.38289	chr12:68718900-68726083 (-) // 93.12 // q15	0.455427	-1.13471	-2.19574	AA down vs CA	---	0005634 // nucleus // inferred from electronic annotation	---	---
3939545	MIF	NM_002415 // MIF // macrophage migration inhibitory factor (glycosylation-inhibi	GGACACTCA	2.26764	chr22:24236564-24237409 (+) // 100.0 // q11.23	1.81727	0.861773	1.81727	AA up vs CA	0001516 // prostaglandin biosynthetic process // inferred from direct assay /// 0001934 // positive regulation of protein phosphorylation // inferred from electronic annotation /// 0006954 // inflammatory response // inferred from electronic annotation /// 0007166 // cell surface receptor linked signaling pathway // inferred from direct assay /// 0007569 // cell aging // inferred from electronic …	0005576 // extracellular region // inferred from direct assay /// 0005576 // extracellular region // inferred from electronic annotation /// 0005615 // extracellular space // inferred from electronic annotation /// 0005737 // cytoplasm // inferred from electronic annotation /// 0009986 // cell surface // inferred from direct assay	0004167 // dopachrome isomerase activity // inferred from direct assay /// 0004167 // dopachrome isomerase activity // inferred from electronic annotation /// 0005102 // receptor binding // inferred from physical interaction /// 0005125 // cytokine activity // inferred from direct assay /// 0005125 // cytokine activity // inferred from electronic annotation /// 0005126 // cytokine receptor bindin…	---
2950885	MLN	NM_002418 // MLN // motilin // 6p21.3 // 4295 /// NM_001040109 // MLN // motilin	ACATTGTCC	2.37683	chr6:33762448-33771793 (-) // 100.0 // p21.31	0.502893	-0.991677	-1.98849	AA down vs CA	0007186 // G-protein coupled receptor protein signaling pathway // traceable author statement /// 0007267 // cell-cell signaling // traceable author statement	0005576 // extracellular region // not recorded /// 0005576 // extracellular region // inferred from electronic annotation /// 0005625 // soluble fraction // traceable author statement	0005102 // receptor binding // traceable author statement /// 0005179 // hormone activity // inferred from electronic annotation	---
2488078	MPHOSPH10	NM_005791 // MPHOSPH10 // M-phase phosphoprotein 10 (U3 small nucleolar ribonucl	GGACATTAG	4.03121	chr2:71357500-71377230 (+) // 98.46 // p13.3	1.79216	0.841699	1.79216	AA up vs CA	0000375 // RNA splicing, via transesterification reactions // non-traceable author statement /// 0006364 // rRNA processing // inferred from electronic annotation /// 0006396 // RNA processing // non-traceable author statement /// 0008380 // RNA splicing // non-traceable author statement /// 0042254 // ribosome biogenesis // inferred from electronic annotation	0005634 // nucleus // inferred from electronic annotation /// 0005730 // nucleolus // inferred from direct assay /// 0005730 // nucleolus // inferred from electronic annotation /// 0005732 // small nucleolar ribonucleoprotein complex // non-traceable author statement /// 0030529 // ribonucleoprotein complex // inferred from electronic annotation	0003676 // nucleic acid binding // inferred from electronic annotation /// 0005515 // protein binding // inferred from physical interaction	---
2488078	MPHOSPH10	NM_005791 // MPHOSPH10 // M-phase phosphoprotein 10 (U3 small nucleolar ribonucl	CGAATGTCC	3.77969	chr2:71357500-71377230 (+) // 98.46 // p13.3	1.79216	0.841699	1.79216	AA up vs CA	0000375 // RNA splicing, via transesterification reactions // non-traceable author statement /// 0006364 // rRNA processing // inferred from electronic annotation /// 0006396 // RNA processing // non-traceable author statement /// 0008380 // RNA splicing // non-traceable author statement /// 0042254 // ribosome biogenesis // inferred from electronic annotation	0005634 // nucleus // inferred from electronic annotation /// 0005730 // nucleolus // inferred from direct assay /// 0005730 // nucleolus // inferred from electronic annotation /// 0005732 // small nucleolar ribonucleoprotein complex // non-traceable author statement /// 0030529 // ribonucleoprotein complex // inferred from electronic annotation	0003676 // nucleic acid binding // inferred from electronic annotation /// 0005515 // protein binding // inferred from physical interaction	---
2674919	MST1R	NM_002447 // MST1R // macrophage stimulating 1 receptor (c-met-related tyrosine	GGACAGTCC	0.75454	chr3:49924437-49941070 (-) // 96.87 // p21.31	0.563229	-0.828206	-1.77548	AA down vs CA	0006468 // protein phosphorylation // inferred from electronic annotation /// 0006928 // cellular component movement // traceable author statement /// 0006952 // defense response // traceable author statement /// 0007165 // signal transduction // traceable author statement /// 0007169 // transmembrane receptor protein tyrosine kinase signaling pathway // inferred from electronic annotation /// 00…	0001725 // stress fiber // inferred from electronic annotation /// 0005886 // plasma membrane // inferred from electronic annotation /// 0005887 // integral to plasma membrane // traceable author statement /// 0016020 // membrane // inferred from electronic annotation /// 0016021 // integral to membrane // inferred from electronic annotation	0000166 // nucleotide binding // inferred from electronic annotation /// 0004672 // protein kinase activity // inferred from electronic annotation /// 0004713 // protein tyrosine kinase activity // inferred from electronic annotation /// 0004714 // transmembrane receptor protein tyrosine kinase activity // inferred from electronic annotation /// 0004872 // receptor activity // inferred from elect…	---
2674919	MST1R	NM_002447 // MST1R // macrophage stimulating 1 receptor (c-met-related tyrosine	CCAGTGTCC	2.8087	chr3:49924437-49941070 (-) // 96.87 // p21.31	0.563229	-0.828206	-1.77548	AA down vs CA	0006468 // protein phosphorylation // inferred from electronic annotation /// 0006928 // cellular component movement // traceable author statement /// 0006952 // defense response // traceable author statement /// 0007165 // signal transduction // traceable author statement /// 0007169 // transmembrane receptor protein tyrosine kinase signaling pathway // inferred from electronic annotation /// 00…	0001725 // stress fiber // inferred from electronic annotation /// 0005886 // plasma membrane // inferred from electronic annotation /// 0005887 // integral to plasma membrane // traceable author statement /// 0016020 // membrane // inferred from electronic annotation /// 0016021 // integral to membrane // inferred from electronic annotation	0000166 // nucleotide binding // inferred from electronic annotation /// 0004672 // protein kinase activity // inferred from electronic annotation /// 0004713 // protein tyrosine kinase activity // inferred from electronic annotation /// 0004714 // transmembrane receptor protein tyrosine kinase activity // inferred from electronic annotation /// 0004872 // receptor activity // inferred from elect…	---
2980258	MTRF1L	NM_019041 // MTRF1L // mitochondrial translational release factor 1-like // 6q25	GCTGTGTCC	4.89044	chr6:153322627-153323824 (-) // 34.59 // q25.2	0.518797	-0.946758	-1.92754	AA down vs CA	0006412 // translation // inferred from electronic annotation /// 0006415 // translational termination // inferred from electronic annotation	0005737 // cytoplasm // inferred from electronic annotation /// 0005739 // mitochondrion // inferred from direct assay /// 0005739 // mitochondrion // inferred from electronic annotation	0003747 // translation release factor activity // inferred from electronic annotation /// 0016149 // translation release factor activity, codon specific // inferred from electronic annotation	---
2980258	MTRF1L	NM_019041 // MTRF1L // mitochondrial translational release factor 1-like // 6q25	GCTGTGTCC	4.89044	chr6:153319433-153320643 (-) // 89.18 // q25.2	0.518797	-0.946758	-1.92754	AA down vs CA	0006412 // translation // inferred from electronic annotation /// 0006415 // translational termination // inferred from electronic annotation	0005737 // cytoplasm // inferred from electronic annotation /// 0005739 // mitochondrion // inferred from direct assay /// 0005739 // mitochondrion // inferred from electronic annotation	0003747 // translation release factor activity // inferred from electronic annotation /// 0016149 // translation release factor activity, codon specific // inferred from electronic annotation	---
2451567	MYBPH	NM_004997 // MYBPH // myosin binding protein H // 1q32.1 // 4608 /// ENST0000025	CGATTGTCC	3.56324	chr1:203136938-203144911 (-) // 99.77 // q32.1	0.531785	-0.911085	-1.88046	AA down vs CA	0006942 // regulation of striated muscle contraction // traceable author statement /// 0007155 // cell adhesion // inferred from electronic annotation	0032982 // myosin filament // inferred from electronic annotation	0008307 // structural constituent of muscle // traceable author statement	G13_Signaling_Pathway // GenMAPP
2931970	MYCT1	NM_025107 // MYCT1 // myc target 1 // 6q25.2 // 80177 /// NM_002156 // HSPD1 //	GGACATTGT	2.59328	chr6:153019037-153043758 (+) // 95.8 // q25.2	0.508724	-0.975045	-1.9657	AA down vs CA	---	0005634 // nucleus // inferred from electronic annotation	---	---
3678516	NAGPA	NM_016256 // NAGPA // N-acetylglucosamine-1-phosphodiester alpha-N-acetylglucosa	GGACACTGC	0.64936	chr16:5074846-5083915 (-) // 99.63 // p13.3	1.71733	0.780167	1.71733	AA up vs CA	0005975 // carbohydrate metabolic process // traceable author statement /// 0006464 // protein modification process // traceable author statement /// 0006622 // protein targeting to lysosome // traceable author statement /// 0007040 // lysosome organization // traceable author statement	0005794 // Golgi apparatus // inferred from electronic annotation /// 0016020 // membrane // inferred from electronic annotation /// 0016021 // integral to membrane // inferred from electronic annotation /// 0016021 // integral to membrane // traceable author statement /// 0032580 // Golgi cisterna membrane // inferred from electronic annotation	0003944 // N-acetylglucosamine-1-phosphodiester alpha-N-acetylglucosaminidase activity // inferred from electronic annotation /// 0003944 // N-acetylglucosamine-1-phosphodiester alpha-N-acetylglucosaminidase activity // traceable author statement /// 0016787 // hydrolase activity // inferred from electronic annotation	---
3678516	NAGPA	NM_016256 // NAGPA // N-acetylglucosamine-1-phosphodiester alpha-N-acetylglucosa	TAAGTGTCC	2.51915	chr16:5074846-5083915 (-) // 99.63 // p13.3	1.71733	0.780167	1.71733	AA up vs CA	0005975 // carbohydrate metabolic process // traceable author statement /// 0006464 // protein modification process // traceable author statement /// 0006622 // protein targeting to lysosome // traceable author statement /// 0007040 // lysosome organization // traceable author statement	0005794 // Golgi apparatus // inferred from electronic annotation /// 0016020 // membrane // inferred from electronic annotation /// 0016021 // integral to membrane // inferred from electronic annotation /// 0016021 // integral to membrane // traceable author statement /// 0032580 // Golgi cisterna membrane // inferred from electronic annotation	0003944 // N-acetylglucosamine-1-phosphodiester alpha-N-acetylglucosaminidase activity // inferred from electronic annotation /// 0003944 // N-acetylglucosamine-1-phosphodiester alpha-N-acetylglucosaminidase activity // traceable author statement /// 0016787 // hydrolase activity // inferred from electronic annotation	---
3678516	NAGPA	NM_016256 // NAGPA // N-acetylglucosamine-1-phosphodiester alpha-N-acetylglucosa	GGACAATTG	3.81475	chr16:5074846-5083915 (-) // 99.63 // p13.3	1.71733	0.780167	1.71733	AA up vs CA	0005975 // carbohydrate metabolic process // traceable author statement /// 0006464 // protein modification process // traceable author statement /// 0006622 // protein targeting to lysosome // traceable author statement /// 0007040 // lysosome organization // traceable author statement	0005794 // Golgi apparatus // inferred from electronic annotation /// 0016020 // membrane // inferred from electronic annotation /// 0016021 // integral to membrane // inferred from electronic annotation /// 0016021 // integral to membrane // traceable author statement /// 0032580 // Golgi cisterna membrane // inferred from electronic annotation	0003944 // N-acetylglucosamine-1-phosphodiester alpha-N-acetylglucosaminidase activity // inferred from electronic annotation /// 0003944 // N-acetylglucosamine-1-phosphodiester alpha-N-acetylglucosaminidase activity // traceable author statement /// 0016787 // hydrolase activity // inferred from electronic annotation	---
3326252	NAT10	NM_024662 // NAT10 // N-acetyltransferase 10 (GCN5-related) // 11p13 // 55226 //	GGACACTAT	3.38289	chr11:34127148-34168457 (+) // 99.9 // p13	1.76557	0.820134	1.76557	AA up vs CA	0008152 // metabolic process // inferred from electronic annotation	0005634 // nucleus // non-traceable author statement /// 0005634 // nucleus // inferred from electronic annotation /// 0005730 // nucleolus // inferred from electronic annotation	0000166 // nucleotide binding // inferred from electronic annotation /// 0005515 // protein binding // inferred from physical interaction /// 0005524 // ATP binding // inferred from electronic annotation /// 0008080 // N-acetyltransferase activity // inferred from electronic annotation /// 0008415 // acyltransferase activity // inferred from electronic annotation /// 0016740 // transferase activi…	---
2603460	NCL	NM_005381 // NCL // nucleolin // 2q37.1 // 4691 /// NR_002908 // SNORD20 // smal	GGACACTGG	2.8087	chr2:232319618-232329175 (-) // 91.38 // q37.1	1.79445	0.843542	1.79445	AA up vs CA	0001525 // angiogenesis // inferred from direct assay	0005634 // nucleus // inferred from electronic annotation /// 0005654 // nucleoplasm // inferred from electronic annotation /// 0005730 // nucleolus // inferred from direct assay /// 0005730 // nucleolus // inferred from electronic annotation /// 0005730 // nucleolus // traceable author statement /// 0005737 // cytoplasm // inferred from electronic annotation /// 0005938 // cell cortex // inferre…	0000166 // nucleotide binding // inferred from electronic annotation /// 0003676 // nucleic acid binding // inferred from electronic annotation /// 0003677 // DNA binding // inferred from electronic annotation /// 0003723 // RNA binding // inferred from direct assay /// 0003723 // RNA binding // inferred from electronic annotation /// 0003723 // RNA binding // traceable author statement /// 00055…	---
2322389	NECAP2	NM_018090 // NECAP2 // NECAP endocytosis associated 2 // 1p36.13 // 55707 /// NM	GGTCTGTCC	4.99562	chr1:16767237-16786572 (+) // 99.78 // p36.13	1.85634	0.892461	1.85634	AA up vs CA	0006810 // transport // inferred from electronic annotation /// 0006897 // endocytosis // inferred from sequence or structural similarity /// 0006897 // endocytosis // inferred from electronic annotation /// 0015031 // protein transport // inferred from electronic annotation	0005622 // intracellular // inferred from direct assay /// 0005886 // plasma membrane // inferred from electronic annotation /// 0005905 // coated pit // inferred from sequence or structural similarity /// 0016020 // membrane // inferred from electronic annotation /// 0030125 // clathrin vesicle coat // inferred from sequence or structural similarity /// 0030665 // clathrin coated vesicle membran…	---	---
3044518	NEUROD6	NM_022728 // NEUROD6 // neurogenic differentiation 6 // 7p14.3 // 63974 /// ENST	GGACACTGA	1.5131	chr7:31377694-31380340 (-) // 95.47 // p14.3	0.577307	-0.792589	-1.73218	AA down vs CA	0006350 // transcription // inferred from electronic annotation /// 0007275 // multicellular organismal development // inferred from electronic annotation /// 0007399 // nervous system development // inferred from electronic annotation /// 0030154 // cell differentiation // inferred from electronic annotation /// 0045449 // regulation of transcription // inferred from electronic annotation	0005634 // nucleus // inferred from electronic annotation	0003677 // DNA binding // inferred from electronic annotation /// 0005509 // calcium ion binding // inferred from electronic annotation /// 0030528 // transcription regulator activity // inferred from electronic annotation	---
3044518	NEUROD6	NM_022728 // NEUROD6 // neurogenic differentiation 6 // 7p14.3 // 63974 /// ENST	GGACAATAA	2.51915	chr7:31377694-31380340 (-) // 95.47 // p14.3	0.577307	-0.792589	-1.73218	AA down vs CA	0006350 // transcription // inferred from electronic annotation /// 0007275 // multicellular organismal development // inferred from electronic annotation /// 0007399 // nervous system development // inferred from electronic annotation /// 0030154 // cell differentiation // inferred from electronic annotation /// 0045449 // regulation of transcription // inferred from electronic annotation	0005634 // nucleus // inferred from electronic annotation	0003677 // DNA binding // inferred from electronic annotation /// 0005509 // calcium ion binding // inferred from electronic annotation /// 0030528 // transcription regulator activity // inferred from electronic annotation	---
3572975	NGB	NM_021257 // NGB // neuroglobin // 14q24.3 // 58157 /// ENST00000298352 // NGB /	GCCCTGTCC	4.94793	chr14:77732816-77737280 (-) // 100.0 // q24.3	0.555061	-0.849282	-1.8016	AA down vs CA	0006810 // transport // inferred from electronic annotation /// 0015671 // oxygen transport // non-traceable author statement /// 0015671 // oxygen transport // inferred from electronic annotation	0005833 // hemoglobin complex // non-traceable author statement	0005344 // oxygen transporter activity // traceable author statement /// 0005344 // oxygen transporter activity // inferred from electronic annotation /// 0005506 // iron ion binding // inferred from electronic annotation /// 0019825 // oxygen binding // inferred from electronic annotation /// 0020037 // heme binding // inferred from electronic annotation /// 0046872 // metal ion binding // infer…	---
2603544	NMUR1	NM_006056 // NMUR1 // neuromedin U receptor 1 // 2q37.1 // 10316 /// ENST0000030	GGACAGTAT	2.73353	chr2:232389753-232393662 (-) // 100.0 // q37.1	0.541025	-0.886233	-1.84834	AA down vs CA	0006816 // calcium ion transport // inferred from direct assay /// 0006821 // chloride transport // inferred from direct assay /// 0006939 // smooth muscle contraction // inferred from expression pattern /// 0007165 // signal transduction // inferred from electronic annotation /// 0007186 // G-protein coupled receptor protein signaling pathway // traceable author statement /// 0007186 // G-protei…	0005624 // membrane fraction // inferred from direct assay /// 0005886 // plasma membrane // inferred from electronic annotation /// 0005887 // integral to plasma membrane // traceable author statement /// 0016020 // membrane // inferred from electronic annotation /// 0016021 // integral to membrane // inferred from direct assay /// 0016021 // integral to membrane // inferred from electronic anno…	0001607 // neuromedin U receptor activity // inferred from direct assay /// 0001607 // neuromedin U receptor activity // inferred from electronic annotation /// 0004871 // signal transducer activity // inferred from electronic annotation /// 0004872 // receptor activity // inferred from electronic annotation /// 0004930 // G-protein coupled receptor activity // traceable author statement /// 0004…	GPCRDB_Class_A_Rhodopsin-like // GenMAPP
2603544	NMUR1	NM_006056 // NMUR1 // neuromedin U receptor 1 // 2q37.1 // 10316 /// ENST0000030	GGACAATGG	2.8087	chr2:232389753-232393662 (-) // 100.0 // q37.1	0.541025	-0.886233	-1.84834	AA down vs CA	0006816 // calcium ion transport // inferred from direct assay /// 0006821 // chloride transport // inferred from direct assay /// 0006939 // smooth muscle contraction // inferred from expression pattern /// 0007165 // signal transduction // inferred from electronic annotation /// 0007186 // G-protein coupled receptor protein signaling pathway // traceable author statement /// 0007186 // G-protei…	0005624 // membrane fraction // inferred from direct assay /// 0005886 // plasma membrane // inferred from electronic annotation /// 0005887 // integral to plasma membrane // traceable author statement /// 0016020 // membrane // inferred from electronic annotation /// 0016021 // integral to membrane // inferred from direct assay /// 0016021 // integral to membrane // inferred from electronic anno…	0001607 // neuromedin U receptor activity // inferred from direct assay /// 0001607 // neuromedin U receptor activity // inferred from electronic annotation /// 0004871 // signal transducer activity // inferred from electronic annotation /// 0004872 // receptor activity // inferred from electronic annotation /// 0004930 // G-protein coupled receptor activity // traceable author statement /// 0004…	GPCRDB_Class_A_Rhodopsin-like // GenMAPP
3980887	NONO	NM_001145408 // NONO // non-POU domain containing, octamer-binding // Xq13.1 //	GGACACTCC	1.4039	chrX:70503501-70521016 (+) // 89.78 // q13.1 /// chr16:69789321-69791973 (-) // 87.58 // q22.1	1.76058	0.816051	1.76058	AA up vs CA	0006281 // DNA repair // inferred from electronic annotation /// 0006310 // DNA recombination // inferred from electronic annotation /// 0006350 // transcription // inferred from electronic annotation /// 0006397 // mRNA processing // inferred from electronic annotation /// 0006397 // mRNA processing // traceable author statement /// 0006974 // response to DNA damage stimulus // inferred from ele…	0005634 // nucleus // inferred from electronic annotation /// 0005634 // nucleus // traceable author statement /// 0016363 // nuclear matrix // inferred from direct assay /// 0042382 // paraspeckles // inferred from direct assay	0000166 // nucleotide binding // inferred from electronic annotation /// 0003676 // nucleic acid binding // inferred from electronic annotation /// 0003677 // DNA binding // inferred from electronic annotation /// 0003723 // RNA binding // inferred from electronic annotation /// 0005515 // protein binding // inferred from physical interaction /// 0005515 // protein binding // inferred from electr…	mRNA_processing_Reactome // GenMAPP
3980887	NONO	NM_001145408 // NONO // non-POU domain containing, octamer-binding // Xq13.1 //	GGACACTCC	1.4039	chrX:70503501-70519992 (+) // 97.47 // q13.1 /// chr16:69790371-69791774 (-) // 84.43 // q22.1	1.76058	0.816051	1.76058	AA up vs CA	0006281 // DNA repair // inferred from electronic annotation /// 0006310 // DNA recombination // inferred from electronic annotation /// 0006350 // transcription // inferred from electronic annotation /// 0006397 // mRNA processing // inferred from electronic annotation /// 0006397 // mRNA processing // traceable author statement /// 0006974 // response to DNA damage stimulus // inferred from ele…	0005634 // nucleus // inferred from electronic annotation /// 0005634 // nucleus // traceable author statement /// 0016363 // nuclear matrix // inferred from direct assay /// 0042382 // paraspeckles // inferred from direct assay	0000166 // nucleotide binding // inferred from electronic annotation /// 0003676 // nucleic acid binding // inferred from electronic annotation /// 0003677 // DNA binding // inferred from electronic annotation /// 0003723 // RNA binding // inferred from electronic annotation /// 0005515 // protein binding // inferred from physical interaction /// 0005515 // protein binding // inferred from electr…	mRNA_processing_Reactome // GenMAPP
3980887	NONO	NM_001145408 // NONO // non-POU domain containing, octamer-binding // Xq13.1 //	GGACACTCC	1.4039	chrX:70503504-70520118 (+) // 96.6 // q13.1	1.76058	0.816051	1.76058	AA up vs CA	0006281 // DNA repair // inferred from electronic annotation /// 0006310 // DNA recombination // inferred from electronic annotation /// 0006350 // transcription // inferred from electronic annotation /// 0006397 // mRNA processing // inferred from electronic annotation /// 0006397 // mRNA processing // traceable author statement /// 0006974 // response to DNA damage stimulus // inferred from ele…	0005634 // nucleus // inferred from electronic annotation /// 0005634 // nucleus // traceable author statement /// 0016363 // nuclear matrix // inferred from direct assay /// 0042382 // paraspeckles // inferred from direct assay	0000166 // nucleotide binding // inferred from electronic annotation /// 0003676 // nucleic acid binding // inferred from electronic annotation /// 0003677 // DNA binding // inferred from electronic annotation /// 0003723 // RNA binding // inferred from electronic annotation /// 0005515 // protein binding // inferred from physical interaction /// 0005515 // protein binding // inferred from electr…	mRNA_processing_Reactome // GenMAPP
2402883	NR0B2	NM_021969 // NR0B2 // nuclear receptor subfamily 0, group B, member 2 // 1p36.1	GGACAGTGG	2.15934	chr1:27237978-27240460 (-) // 99.14 // p36.11	0.527755	-0.92206	-1.89482	AA down vs CA	0000122 // negative regulation of transcription from RNA polymerase II promoter // inferred from electronic annotation /// 0000122 // negative regulation of transcription from RNA polymerase II promoter // traceable author statement /// 0006350 // transcription // inferred from electronic annotation /// 0006355 // regulation of transcription, DNA-dependent // inferred from electronic annotation /…	0005634 // nucleus // inferred from direct assay /// 0005634 // nucleus // inferred from electronic annotation /// 0043234 // protein complex // inferred from electronic annotation	0003677 // DNA binding // inferred from electronic annotation /// 0003700 // sequence-specific DNA binding transcription factor activity // inferred from electronic annotation /// 0003707 // steroid hormone receptor activity // inferred from electronic annotation /// 0003714 // transcription corepressor activity // traceable author statement /// 0004872 // receptor activity // inferred from elect…	---
2540157	ODC1	NM_002539 // ODC1 // ornithine decarboxylase 1 // 2p25 // 4953 /// NR_028374 //	GGATTGTCC	1.4039	chr2:10580507-10588453 (-) // 97.67 // p25.1	1.76618	0.820632	1.76618	AA up vs CA	0001822 // kidney development // inferred from electronic annotation /// 0006596 // polyamine biosynthetic process // non-traceable author statement /// 0006596 // polyamine biosynthetic process // inferred from electronic annotation /// 0008284 // positive regulation of cell proliferation // inferred from electronic annotation /// 0009615 // response to virus // inferred from expression pattern	0005829 // cytosol // inferred from electronic annotation	0003824 // catalytic activity // inferred from electronic annotation /// 0004586 // ornithine decarboxylase activity // traceable author statement /// 0004586 // ornithine decarboxylase activity // inferred from electronic annotation /// 0005515 // protein binding // inferred from physical interaction /// 0016829 // lyase activity // inferred from electronic annotation /// 0016831 // carboxy-lyas…	---
2540157	ODC1	NM_002539 // ODC1 // ornithine decarboxylase 1 // 2p25 // 4953 /// NR_028374 //	AAAGTGTCC	3.38289	chr2:10580507-10588453 (-) // 97.67 // p25.1	1.76618	0.820632	1.76618	AA up vs CA	0001822 // kidney development // inferred from electronic annotation /// 0006596 // polyamine biosynthetic process // non-traceable author statement /// 0006596 // polyamine biosynthetic process // inferred from electronic annotation /// 0008284 // positive regulation of cell proliferation // inferred from electronic annotation /// 0009615 // response to virus // inferred from expression pattern	0005829 // cytosol // inferred from electronic annotation	0003824 // catalytic activity // inferred from electronic annotation /// 0004586 // ornithine decarboxylase activity // traceable author statement /// 0004586 // ornithine decarboxylase activity // inferred from electronic annotation /// 0005515 // protein binding // inferred from physical interaction /// 0016829 // lyase activity // inferred from electronic annotation /// 0016831 // carboxy-lyas…	---
2947789	OR12D3	NM_030959 // OR12D3 // olfactory receptor, family 12, subfamily D, member 3 // 6	GGACATTGT	2.59328	chr6:29342113-29343064 (-) // 100.0 // p22.1	0.561965	-0.831448	-1.77947	AA down vs CA	0007165 // signal transduction // inferred from electronic annotation /// 0007186 // G-protein coupled receptor protein signaling pathway // inferred from electronic annotation /// 0007608 // sensory perception of smell // inferred from electronic annotation /// 0050896 // response to stimulus // inferred from electronic annotation	0005886 // plasma membrane // inferred from electronic annotation /// 0016020 // membrane // inferred from electronic annotation /// 0016021 // integral to membrane // inferred from electronic annotation	0004871 // signal transducer activity // inferred from electronic annotation /// 0004872 // receptor activity // inferred from electronic annotation /// 0004930 // G-protein coupled receptor activity // inferred from electronic annotation /// 0004984 // olfactory receptor activity // inferred from electronic annotation	GPCRDB_Class_A_Rhodopsin-like // GenMAPP
2947789	OR12D3	NM_030959 // OR12D3 // olfactory receptor, family 12, subfamily D, member 3 // 6	GGACAGCTT	6.97461	chr6:29342113-29343064 (-) // 100.0 // p22.1	0.561965	-0.831448	-1.77947	AA down vs CA	0007165 // signal transduction // inferred from electronic annotation /// 0007186 // G-protein coupled receptor protein signaling pathway // inferred from electronic annotation /// 0007608 // sensory perception of smell // inferred from electronic annotation /// 0050896 // response to stimulus // inferred from electronic annotation	0005886 // plasma membrane // inferred from electronic annotation /// 0016020 // membrane // inferred from electronic annotation /// 0016021 // integral to membrane // inferred from electronic annotation	0004871 // signal transducer activity // inferred from electronic annotation /// 0004872 // receptor activity // inferred from electronic annotation /// 0004930 // G-protein coupled receptor activity // inferred from electronic annotation /// 0004984 // olfactory receptor activity // inferred from electronic annotation	GPCRDB_Class_A_Rhodopsin-like // GenMAPP
2947789	OR12D3	NM_030959 // OR12D3 // olfactory receptor, family 12, subfamily D, member 3 // 6	GGACAGTGG	2.15934	chr6:29342113-29343064 (-) // 100.0 // p22.1	0.561965	-0.831448	-1.77947	AA down vs CA	0007165 // signal transduction // inferred from electronic annotation /// 0007186 // G-protein coupled receptor protein signaling pathway // inferred from electronic annotation /// 0007608 // sensory perception of smell // inferred from electronic annotation /// 0050896 // response to stimulus // inferred from electronic annotation	0005886 // plasma membrane // inferred from electronic annotation /// 0016020 // membrane // inferred from electronic annotation /// 0016021 // integral to membrane // inferred from electronic annotation	0004871 // signal transducer activity // inferred from electronic annotation /// 0004872 // receptor activity // inferred from electronic annotation /// 0004930 // G-protein coupled receptor activity // inferred from electronic annotation /// 0004984 // olfactory receptor activity // inferred from electronic annotation	GPCRDB_Class_A_Rhodopsin-like // GenMAPP
2900143	OR2B6	NM_012367 // OR2B6 // olfactory receptor, family 2, subfamily B, member 6 // 6p2	GGACAGTAT	2.73353	chr6:27925018-27925960 (+) // 100.0 // p22.1	0.547487	-0.869103	-1.82653	AA down vs CA	0007165 // signal transduction // inferred from electronic annotation /// 0007186 // G-protein coupled receptor protein signaling pathway // inferred from electronic annotation /// 0007608 // sensory perception of smell // inferred from electronic annotation /// 0050896 // response to stimulus // inferred from electronic annotation	0005886 // plasma membrane // inferred from electronic annotation /// 0016020 // membrane // inferred from electronic annotation /// 0016021 // integral to membrane // inferred from electronic annotation	0004871 // signal transducer activity // inferred from electronic annotation /// 0004872 // receptor activity // inferred from electronic annotation /// 0004930 // G-protein coupled receptor activity // inferred from electronic annotation /// 0004984 // olfactory receptor activity // inferred from electronic annotation	---
2407934	PABPC4	NM_001135653 // PABPC4 // poly(A) binding protein, cytoplasmic 4 (inducible form	TAAATGTCC	2.73561	chr1:40026487-40042416 (-) // 96.87 // p34.3	1.93766	0.954315	1.93766	AA up vs CA	0006396 // RNA processing // traceable author statement /// 0006401 // RNA catabolic process // traceable author statement /// 0006412 // translation // traceable author statement /// 0007596 // blood coagulation // traceable author statement	0005737 // cytoplasm // inferred from direct assay /// 0005737 // cytoplasm // inferred from electronic annotation /// 0005737 // cytoplasm // traceable author statement /// 0030529 // ribonucleoprotein complex // inferred from direct assay	0000166 // nucleotide binding // inferred from electronic annotation /// 0003676 // nucleic acid binding // inferred from electronic annotation /// 0003723 // RNA binding // inferred from electronic annotation /// 0005515 // protein binding // inferred from physical interaction /// 0008143 // poly(A) RNA binding // inferred from direct assay /// 0008143 // poly(A) RNA binding // traceable author …	---
2728189	PAICS	NM_001079525 // PAICS // phosphoribosylaminoimidazole carboxylase, phosphoribosy	GCGCTGTCC	4.24108	chr4:57302322-57327527 (+) // 89.54 // q12 /// chr8:4644672-4646266 (+) // 63.17 // p23.2	1.80993	0.855934	1.80993	AA up vs CA	0006164 // purine nucleotide biosynthetic process // inferred from electronic annotation /// 0006189 // 'de novo' IMP biosynthetic process // inferred from electronic annotation /// 0009113 // purine base biosynthetic process // traceable author statement /// 0009168 // purine ribonucleoside monophosphate biosynthetic process // not recorded	---	0000166 // nucleotide binding // inferred from electronic annotation /// 0003824 // catalytic activity // inferred from electronic annotation /// 0004638 // phosphoribosylaminoimidazole carboxylase activity // inferred from electronic annotation /// 0004639 // phosphoribosylaminoimidazolesuccinocarboxamide synthase activity // inferred from electronic annotation /// 0004639 // phosphoribosylamino…	---
2728189	PAICS	NM_001079525 // PAICS // phosphoribosylaminoimidazole carboxylase, phosphoribosy	GCGCTGTCC	4.24108	chr4:57302454-57325828 (+) // 99.93 // q12 /// chr8:4644829-4646231 (+) // 95.51 // p23.2	1.80993	0.855934	1.80993	AA up vs CA	0006164 // purine nucleotide biosynthetic process // inferred from electronic annotation /// 0006189 // 'de novo' IMP biosynthetic process // inferred from electronic annotation /// 0009113 // purine base biosynthetic process // traceable author statement /// 0009168 // purine ribonucleoside monophosphate biosynthetic process // not recorded	---	0000166 // nucleotide binding // inferred from electronic annotation /// 0003824 // catalytic activity // inferred from electronic annotation /// 0004638 // phosphoribosylaminoimidazole carboxylase activity // inferred from electronic annotation /// 0004639 // phosphoribosylaminoimidazolesuccinocarboxamide synthase activity // inferred from electronic annotation /// 0004639 // phosphoribosylamino…	---
2728189	PAICS	NM_001079525 // PAICS // phosphoribosylaminoimidazole carboxylase, phosphoribosy	GCGCTGTCC	4.24108	chr4:57319873-57327970 (+) // 52.03 // q12	1.80993	0.855934	1.80993	AA up vs CA	0006164 // purine nucleotide biosynthetic process // inferred from electronic annotation /// 0006189 // 'de novo' IMP biosynthetic process // inferred from electronic annotation /// 0009113 // purine base biosynthetic process // traceable author statement /// 0009168 // purine ribonucleoside monophosphate biosynthetic process // not recorded	---	0000166 // nucleotide binding // inferred from electronic annotation /// 0003824 // catalytic activity // inferred from electronic annotation /// 0004638 // phosphoribosylaminoimidazole carboxylase activity // inferred from electronic annotation /// 0004639 // phosphoribosylaminoimidazolesuccinocarboxamide synthase activity // inferred from electronic annotation /// 0004639 // phosphoribosylamino…	---
2780999	PAPSS1	NM_005443 // PAPSS1 // 3'-phosphoadenosine 5'-phosphosulfate synthase 1 // 4q24	AAAATGTCC	3.59934	chr4:108535055-108641361 (-) // 99.25 // q25	2.00726	1.00523	2.00726	AA up vs CA	0000103 // sulfate assimilation // inferred from electronic annotation /// 0001501 // skeletal system development // traceable author statement /// 0050428 // 3'-phosphoadenosine 5'-phosphosulfate biosynthetic process // inferred from electronic annotation	---	0000166 // nucleotide binding // inferred from electronic annotation /// 0003824 // catalytic activity // inferred from electronic annotation /// 0004020 // adenylylsulfate kinase activity // inferred from electronic annotation /// 0004781 // sulfate adenylyltransferase (ATP) activity // inferred from sequence or structural similarity /// 0004781 // sulfate adenylyltransferase (ATP) activity // i…	---
2560195	PCGF1	NM_032673 // PCGF1 // polycomb group ring finger 1 // 2p13.1 // 84759 /// ENST00	AAATTGTCC	3.38289	chr2:74732170-74734786 (-) // 96.24 // p13.1	1.73061	0.791281	1.73061	AA up vs CA	0006350 // transcription // inferred from electronic annotation /// 0045449 // regulation of transcription // inferred from electronic annotation	0005634 // nucleus // inferred from direct assay /// 0005634 // nucleus // inferred from electronic annotation /// 0005730 // nucleolus // inferred from direct assay	0005515 // protein binding // inferred from electronic annotation /// 0008022 // protein C-terminus binding // inferred from physical interaction /// 0008270 // zinc ion binding // inferred from electronic annotation /// 0046872 // metal ion binding // inferred from electronic annotation	---
2560195	PCGF1	NM_032673 // PCGF1 // polycomb group ring finger 1 // 2p13.1 // 84759 /// ENST00	AAATTGTCC	3.38289	chr2:74732170-74734786 (-) // 96.24 // p13.1	1.73061	0.791281	1.73061	AA up vs CA	0006350 // transcription // inferred from electronic annotation /// 0045449 // regulation of transcription // inferred from electronic annotation	0005634 // nucleus // inferred from direct assay /// 0005634 // nucleus // inferred from electronic annotation /// 0005730 // nucleolus // inferred from direct assay	0005515 // protein binding // inferred from electronic annotation /// 0008022 // protein C-terminus binding // inferred from physical interaction /// 0008270 // zinc ion binding // inferred from electronic annotation /// 0046872 // metal ion binding // inferred from electronic annotation	---
2633930	PCNP	NM_020357 // PCNP // PEST proteolytic signal containing nuclear protein // 3q12.	GGACAATCG	3.56324	chr3:101293041-101313279 (+) // 99.38 // q12.3 /// chr13:48900515-48902710 (-) // 88.98 // q14.2 /// chr12:112104736-112108183 (-) // 90.67 // q24.12	1.7959	0.844707	1.7959	AA up vs CA	0007049 // cell cycle // inferred from electronic annotation /// 0016567 // protein ubiquitination // inferred from direct assay /// 0043161 // proteasomal ubiquitin-dependent protein catabolic process // inferred from direct assay	0005634 // nucleus // inferred from direct assay /// 0005634 // nucleus // inferred from electronic annotation	0005515 // protein binding // inferred from physical interaction	---
3393200	PCSK7	NM_004716 // PCSK7 // proprotein convertase subtilisin/kexin type 7 // 11q23-q24	GGACAATGG	2.8087	chr11:117075811-117101185 (-) // 99.35 // q23.3	2.00378	1.00272	2.00378	AA up vs CA	0006508 // proteolysis // inferred from electronic annotation /// 0016486 // peptide hormone processing // non-traceable author statement	0005794 // Golgi apparatus // inferred from electronic annotation /// 0016020 // membrane // inferred from electronic annotation /// 0016021 // integral to membrane // inferred from electronic annotation /// 0030173 // integral to Golgi membrane // inferred from direct assay	0004252 // serine-type endopeptidase activity // inferred from electronic annotation /// 0008233 // peptidase activity // inferred from electronic annotation /// 0008236 // serine-type peptidase activity // inferred from electronic annotation /// 0016787 // hydrolase activity // inferred from electronic annotation	---
3044597	PDE1C	NM_001191059 // PDE1C // phosphodiesterase 1C, calmodulin-dependent 70kDa // 7p1	GGACAGTGG	2.15934	chr7:31829246-32110991 (-) // 99.93 // p14.3	0.572939	-0.803547	-1.74539	AA down vs CA	0006198 // cAMP catabolic process // inferred from electronic annotation /// 0007165 // signal transduction // inferred from electronic annotation /// 0007608 // sensory perception of smell // inferred from electronic annotation /// 0046069 // cGMP catabolic process // inferred from electronic annotation /// 0046676 // negative regulation of insulin secretion // inferred from electronic annotatio…	0005829 // cytosol // not recorded /// 0043025 // neuronal cell body // inferred from electronic annotation	0003824 // catalytic activity // inferred from electronic annotation /// 0004114 // 3',5'-cyclic-nucleotide phosphodiesterase activity // inferred from electronic annotation /// 0004115 // 3',5'-cyclic-AMP phosphodiesterase activity // inferred from electronic annotation /// 0004117 // calmodulin-dependent cyclic-nucleotide phosphodiesterase activity // traceable author statement /// 0004117 // c…	G_Protein_Signaling // GenMAPP
3044597	PDE1C	NM_001191059 // PDE1C // phosphodiesterase 1C, calmodulin-dependent 70kDa // 7p1	GGACAGTGG	2.15934	chr7:31792617-31917640 (-) // 99.86 // p14.3	0.572939	-0.803547	-1.74539	AA down vs CA	0006198 // cAMP catabolic process // inferred from electronic annotation /// 0007165 // signal transduction // inferred from electronic annotation /// 0007608 // sensory perception of smell // inferred from electronic annotation /// 0046069 // cGMP catabolic process // inferred from electronic annotation /// 0046676 // negative regulation of insulin secretion // inferred from electronic annotatio…	0005829 // cytosol // not recorded /// 0043025 // neuronal cell body // inferred from electronic annotation	0003824 // catalytic activity // inferred from electronic annotation /// 0004114 // 3',5'-cyclic-nucleotide phosphodiesterase activity // inferred from electronic annotation /// 0004115 // 3',5'-cyclic-AMP phosphodiesterase activity // inferred from electronic annotation /// 0004117 // calmodulin-dependent cyclic-nucleotide phosphodiesterase activity // traceable author statement /// 0004117 // c…	G_Protein_Signaling // GenMAPP
3381150	PDE2A	NR_026572 // PDE2A // phosphodiesterase 2A, cGMP-stimulated // 11q13.4 // 5138 /	TTACTGTCC	1.86979	chr11:72287185-72385412 (-) // 93.3 // q13.4	0.507112	-0.979624	-1.97195	AA down vs CA	0006198 // cAMP catabolic process // inferred from electronic annotation /// 0007165 // signal transduction // inferred from electronic annotation /// 0046069 // cGMP catabolic process // inferred from electronic annotation	0005829 // cytosol // not recorded /// 0016020 // membrane // inferred from electronic annotation /// 0045121 // membrane raft // inferred from electronic annotation	0000166 // nucleotide binding // inferred from electronic annotation /// 0003824 // catalytic activity // inferred from electronic annotation /// 0004114 // 3',5'-cyclic-nucleotide phosphodiesterase activity // inferred from electronic annotation /// 0004118 // cGMP-stimulated cyclic-nucleotide phosphodiesterase activity // traceable author statement /// 0004118 // cGMP-stimulated cyclic-nucleoti…	---
3406229	PDE6H	NM_006205 // PDE6H // phosphodiesterase 6H, cGMP-specific, cone, gamma // 12p13	TAAGTGTCC	2.51915	chr12:15125977-15134799 (+) // 99.86 // p12.3	0.567424	-0.817501	-1.76235	AA down vs CA	0000187 // activation of MAPK activity // inferred from electronic annotation /// 0007601 // visual perception // inferred from electronic annotation /// 0007601 // visual perception // traceable author statement /// 0045742 // positive regulation of epidermal growth factor receptor signaling pathway // inferred from electronic annotation /// 0045745 // positive regulation of G-protein coupled re…	---	0004114 // 3',5'-cyclic-nucleotide phosphodiesterase activity // inferred from electronic annotation /// 0004857 // enzyme inhibitor activity // traceable author statement /// 0016787 // hydrolase activity // inferred from electronic annotation /// 0030553 // cGMP binding // inferred from electronic annotation	---
3406229	PDE6H	NM_006205 // PDE6H // phosphodiesterase 6H, cGMP-specific, cone, gamma // 12p13	TCAATGTCC	1.72955	chr12:15125977-15134799 (+) // 99.86 // p12.3	0.567424	-0.817501	-1.76235	AA down vs CA	0000187 // activation of MAPK activity // inferred from electronic annotation /// 0007601 // visual perception // inferred from electronic annotation /// 0007601 // visual perception // traceable author statement /// 0045742 // positive regulation of epidermal growth factor receptor signaling pathway // inferred from electronic annotation /// 0045745 // positive regulation of G-protein coupled re…	---	0004114 // 3',5'-cyclic-nucleotide phosphodiesterase activity // inferred from electronic annotation /// 0004857 // enzyme inhibitor activity // traceable author statement /// 0016787 // hydrolase activity // inferred from electronic annotation /// 0030553 // cGMP binding // inferred from electronic annotation	---
2598606	PECR	NM_018441 // PECR // peroxisomal trans-2-enoyl-CoA reductase // 2q35 // 55825 //	AAAGTGTCC	3.38289	chr2:216903826-216946521 (-) // 98.18 // q35	0.519702	-0.944243	-1.92418	AA down vs CA	0006631 // fatty acid metabolic process // traceable author statement /// 0006633 // fatty acid biosynthetic process // inferred from electronic annotation /// 0008152 // metabolic process // inferred from electronic annotation /// 0008610 // lipid biosynthetic process // inferred from electronic annotation /// 0042981 // regulation of apoptosis // inferred from electronic annotation /// 0055114 …	0005739 // mitochondrion // inferred from electronic annotation /// 0005777 // peroxisome // inferred from electronic annotation /// 0005777 // peroxisome // non-traceable author statement /// 0043231 // intracellular membrane-bounded organelle // inferred from direct assay	0003824 // catalytic activity // inferred from electronic annotation /// 0005488 // binding // inferred from electronic annotation /// 0016491 // oxidoreductase activity // inferred from electronic annotation /// 0019166 // trans-2-enoyl-CoA reductase (NADPH) activity // inferred from electronic annotation	Mitochondrial_fatty_acid_betaoxidation // GenMAPP
3744150	PER1	NM_002616 // PER1 // period homolog 1 (Drosophila) // 17p13.1 // 5187 /// ENST00	AGAATGTCC	3.34783	chr17:8043789-8055702 (-) // 97.55 // p13.1	0.461822	-1.11459	-2.16534	AA down vs CA	0006350 // transcription // inferred from electronic annotation /// 0006355 // regulation of transcription, DNA-dependent // inferred from electronic annotation /// 0007165 // signal transduction // inferred from electronic annotation /// 0007623 // circadian rhythm // inferred from electronic annotation /// 0007623 // circadian rhythm // traceable author statement /// 0009416 // response to ligh…	0005634 // nucleus // inferred from electronic annotation /// 0005737 // cytoplasm // inferred from electronic annotation	0004871 // signal transducer activity // inferred from electronic annotation /// 0005515 // protein binding // inferred from electronic annotation	Circadian_Exercise // GenMAPP
3744150	PER1	NM_002616 // PER1 // period homolog 1 (Drosophila) // 17p13.1 // 5187 /// ENST00	AGAATGTCC	3.34783	chr17:8043790-8055702 (-) // 89.44 // p13.1	0.461822	-1.11459	-2.16534	AA down vs CA	0006350 // transcription // inferred from electronic annotation /// 0006355 // regulation of transcription, DNA-dependent // inferred from electronic annotation /// 0007165 // signal transduction // inferred from electronic annotation /// 0007623 // circadian rhythm // inferred from electronic annotation /// 0007623 // circadian rhythm // traceable author statement /// 0009416 // response to ligh…	0005634 // nucleus // inferred from electronic annotation /// 0005737 // cytoplasm // inferred from electronic annotation	0004871 // signal transducer activity // inferred from electronic annotation /// 0005515 // protein binding // inferred from electronic annotation	Circadian_Exercise // GenMAPP
2318656	PER3	NM_016831 // PER3 // period homolog 3 (Drosophila) // 1p36.23 // 8863 /// ENST00	GGACACTCC	1.4039	chr1:7844762-7905237 (+) // 99.26 // p36.23	0.505091	-0.985385	-1.97984	AA down vs CA	0006350 // transcription // inferred from electronic annotation /// 0006355 // regulation of transcription, DNA-dependent // inferred from electronic annotation /// 0007165 // signal transduction // inferred from electronic annotation /// 0007623 // circadian rhythm // inferred from electronic annotation /// 0010553 // negative regulation of gene-specific transcription from RNA polymerase II prom…	0005634 // nucleus // inferred from electronic annotation /// 0005737 // cytoplasm // inferred from electronic annotation	0004871 // signal transducer activity // inferred from electronic annotation /// 0005515 // protein binding // inferred from electronic annotation	---
3403299	PEX5	NM_001131025 // PEX5 // peroxisomal biogenesis factor 5 // 12p13.31 // 5830 ///	GGTCTGTCC	4.99562	chr12:7342959-7364044 (+) // 99.74 // p13.31	0.520564	-0.941853	-1.92099	AA down vs CA	0000038 // very long-chain fatty acid metabolic process // inferred from electronic annotation /// 0001764 // neuron migration // inferred from electronic annotation /// 0006625 // protein targeting to peroxisome // inferred from mutant phenotype /// 0006625 // protein targeting to peroxisome // traceable author statement /// 0006635 // fatty acid beta-oxidation // inferred from electronic annota…	0005737 // cytoplasm // inferred from electronic annotation /// 0005777 // peroxisome // inferred from direct assay /// 0005777 // peroxisome // inferred from electronic annotation /// 0005778 // peroxisomal membrane // inferred from electronic annotation /// 0005778 // peroxisomal membrane // traceable author statement /// 0005782 // peroxisomal matrix // inferred from direct assay /// 0005829 /…	0000268 // peroxisome targeting sequence binding // traceable author statement /// 0004872 // receptor activity // inferred from electronic annotation /// 0005052 // peroxisome matrix targeting signal-1 binding // inferred from direct assay /// 0005052 // peroxisome matrix targeting signal-1 binding // inferred from mutant phenotype /// 0005488 // binding // inferred from electronic annotation //…	---
3403299	PEX5	NM_001131025 // PEX5 // peroxisomal biogenesis factor 5 // 12p13.31 // 5830 ///	GGTCTGTCC	4.99562	chr12:7342956-7371170 (+) // 98.03 // p13.31	0.520564	-0.941853	-1.92099	AA down vs CA	0000038 // very long-chain fatty acid metabolic process // inferred from electronic annotation /// 0001764 // neuron migration // inferred from electronic annotation /// 0006625 // protein targeting to peroxisome // inferred from mutant phenotype /// 0006625 // protein targeting to peroxisome // traceable author statement /// 0006635 // fatty acid beta-oxidation // inferred from electronic annota…	0005737 // cytoplasm // inferred from electronic annotation /// 0005777 // peroxisome // inferred from direct assay /// 0005777 // peroxisome // inferred from electronic annotation /// 0005778 // peroxisomal membrane // inferred from electronic annotation /// 0005778 // peroxisomal membrane // traceable author statement /// 0005782 // peroxisomal matrix // inferred from direct assay /// 0005829 /…	0000268 // peroxisome targeting sequence binding // traceable author statement /// 0004872 // receptor activity // inferred from electronic annotation /// 0005052 // peroxisome matrix targeting signal-1 binding // inferred from direct assay /// 0005052 // peroxisome matrix targeting signal-1 binding // inferred from mutant phenotype /// 0005488 // binding // inferred from electronic annotation //…	---
3742400	PFN1	NM_005022 // PFN1 // profilin 1 // 17p13.3 // 5216 /// ENST00000225655 // PFN1 /	GGACAATCC	1.4039	chr1:171639419-171640218 (-) // 89.53 // q24.3 /// chr17:4848951-4851816 (-) // 100.0 // p13.2	1.7777	0.830012	1.7777	AA up vs CA	0001843 // neural tube closure // inferred from electronic annotation /// 0006357 // regulation of transcription from RNA polymerase II promoter // inferred from electronic annotation /// 0007010 // cytoskeleton organization // inferred from electronic annotation /// 0030036 // actin cytoskeleton organization // inferred from electronic annotation	0005634 // nucleus // inferred from electronic annotation /// 0005737 // cytoplasm // inferred from electronic annotation /// 0005856 // cytoskeleton // inferred from electronic annotation /// 0015629 // actin cytoskeleton // inferred from electronic annotation	0003779 // actin binding // inferred from physical interaction /// 0003779 // actin binding // inferred from electronic annotation /// 0005515 // protein binding // inferred from electronic annotation /// 0017048 // Rho GTPase binding // inferred from electronic annotation /// 0070064 // proline-rich region binding // inferred from physical interaction	G13_Signaling_Pathway // GenMAPP
2460189	PGBD5	NM_024554 // PGBD5 // piggyBac transposable element derived 5 // 1q42.13 // 7960	GGACAGTGA	0.86373	chr1:230457404-230468617 (-) // 98.81 // q42.13	0.522264	-0.937149	-1.91474	AA down vs CA	---	0016020 // membrane // inferred from electronic annotation /// 0016021 // integral to membrane // inferred from electronic annotation	---	---
3867865	PIH1D1	NM_017916 // PIH1D1 // PIH1 domain containing 1 // 19q13.33 // 55011 /// ENST000	GGACATTGA	1.72955	chr19:49949555-49955067 (-) // 98.68 // q13.33	1.73539	0.79526	1.73539	AA up vs CA	0000492 // box C/D snoRNP assembly // inferred from mutant phenotype	0070761 // pre-snoRNP complex // inferred from direct assay	---	---
2697564	PIK3CB	NM_006219 // PIK3CB // phosphoinositide-3-kinase, catalytic, beta polypeptide //	TAAGTGTCC	2.51915	chr3:138372861-138515409 (-) // 98.52 // q22.3	1.79876	0.847003	1.79876	AA up vs CA	0000187 // activation of MAPK activity // traceable author statement /// 0001952 // regulation of cell-matrix adhesion // inferred from electronic annotation /// 0006874 // cellular calcium ion homeostasis // inferred from electronic annotation /// 0006935 // chemotaxis // traceable author statement /// 0007156 // homophilic cell adhesion // inferred from electronic annotation /// 0007165 // sign…	0005829 // cytosol // not recorded /// 0005942 // phosphoinositide 3-kinase complex // inferred from electronic annotation	0000166 // nucleotide binding // inferred from electronic annotation /// 0004428 // inositol or phosphatidylinositol kinase activity // inferred from electronic annotation /// 0005488 // binding // inferred from electronic annotation /// 0005524 // ATP binding // inferred from electronic annotation /// 0016301 // kinase activity // inferred from electronic annotation /// 0016303 // 1-phosphatidyl…	G13_Signaling_Pathway // GenMAPP
2697564	PIK3CB	NM_006219 // PIK3CB // phosphoinositide-3-kinase, catalytic, beta polypeptide //	TAAGTGTCC	2.51915	chr3:138471722-138474823 (-) // 85.71 // q22.3	1.79876	0.847003	1.79876	AA up vs CA	0000187 // activation of MAPK activity // traceable author statement /// 0001952 // regulation of cell-matrix adhesion // inferred from electronic annotation /// 0006874 // cellular calcium ion homeostasis // inferred from electronic annotation /// 0006935 // chemotaxis // traceable author statement /// 0007156 // homophilic cell adhesion // inferred from electronic annotation /// 0007165 // sign…	0005829 // cytosol // not recorded /// 0005942 // phosphoinositide 3-kinase complex // inferred from electronic annotation	0000166 // nucleotide binding // inferred from electronic annotation /// 0004428 // inositol or phosphatidylinositol kinase activity // inferred from electronic annotation /// 0005488 // binding // inferred from electronic annotation /// 0005524 // ATP binding // inferred from electronic annotation /// 0016301 // kinase activity // inferred from electronic annotation /// 0016303 // 1-phosphatidyl…	G13_Signaling_Pathway // GenMAPP
2876361	PITX1	NM_002653 // PITX1 // paired-like homeodomain 1 // 5q31 // 5307 /// ENST00000265	GGACAAAGC	4.89044	chr5:134364467-134370085 (-) // 88.46 // q31.1	0.562901	-0.829047	-1.77651	AA down vs CA	0001501 // skeletal system development // traceable author statement /// 0001501 // skeletal system development // inferred from electronic annotation /// 0006350 // transcription // inferred from electronic annotation /// 0006355 // regulation of transcription, DNA-dependent // inferred from electronic annotation /// 0007275 // multicellular organismal development // inferred from electronic ann…	0005634 // nucleus // inferred from electronic annotation /// 0005730 // nucleolus // inferred from direct assay	0003677 // DNA binding // inferred from electronic annotation /// 0003700 // sequence-specific DNA binding transcription factor activity // inferred from electronic annotation /// 0030528 // transcription regulator activity // inferred from electronic annotation /// 0043565 // sequence-specific DNA binding // inferred from electronic annotation	---
2876361	PITX1	NM_002653 // PITX1 // paired-like homeodomain 1 // 5q31 // 5307 /// ENST00000265	GGACAAAGC	4.89044	chr5:134363468-134369774 (-) // 90.9 // q31.1	0.562901	-0.829047	-1.77651	AA down vs CA	0001501 // skeletal system development // traceable author statement /// 0001501 // skeletal system development // inferred from electronic annotation /// 0006350 // transcription // inferred from electronic annotation /// 0006355 // regulation of transcription, DNA-dependent // inferred from electronic annotation /// 0007275 // multicellular organismal development // inferred from electronic ann…	0005634 // nucleus // inferred from electronic annotation /// 0005730 // nucleolus // inferred from direct assay	0003677 // DNA binding // inferred from electronic annotation /// 0003700 // sequence-specific DNA binding transcription factor activity // inferred from electronic annotation /// 0030528 // transcription regulator activity // inferred from electronic annotation /// 0043565 // sequence-specific DNA binding // inferred from electronic annotation	---
2638077	PLA1A	NM_015900 // PLA1A // phospholipase A1 member A // 3q13.13-q13.2 // 51365 /// EN	GGACACTTA	2.51915	chr3:119316744-119348651 (+) // 98.01 // q13.33	1.96141	0.971891	1.96141	AA up vs CA	0006629 // lipid metabolic process // traceable author statement /// 0006629 // lipid metabolic process // inferred from electronic annotation /// 0006658 // phosphatidylserine metabolic process // traceable author statement /// 0016042 // lipid catabolic process // inferred from electronic annotation	0005576 // extracellular region // inferred from electronic annotation	0003824 // catalytic activity // inferred from electronic annotation /// 0008970 // phospholipase A1 activity // traceable author statement /// 0016787 // hydrolase activity // inferred from electronic annotation	---
2638077	PLA1A	NM_015900 // PLA1A // phospholipase A1 member A // 3q13.13-q13.2 // 51365 /// EN	GGACAGTGT	1.72747	chr3:119316744-119348651 (+) // 98.01 // q13.33	1.96141	0.971891	1.96141	AA up vs CA	0006629 // lipid metabolic process // traceable author statement /// 0006629 // lipid metabolic process // inferred from electronic annotation /// 0006658 // phosphatidylserine metabolic process // traceable author statement /// 0016042 // lipid catabolic process // inferred from electronic annotation	0005576 // extracellular region // inferred from electronic annotation	0003824 // catalytic activity // inferred from electronic annotation /// 0008970 // phospholipase A1 activity // traceable author statement /// 0016787 // hydrolase activity // inferred from electronic annotation	---
3142362	PMP2	NM_002677 // PMP2 // peripheral myelin protein 2 // 8q21.3-q22.1 // 5375 /// NM_	CTAATGTCC	4.03121	chr8:82354026-82359655 (-) // 51.67 // q21.13	0.568215	-0.815491	-1.7599	AA down vs CA	0006810 // transport // inferred from electronic annotation	---	0005215 // transporter activity // inferred from electronic annotation /// 0005488 // binding // inferred from electronic annotation /// 0008289 // lipid binding // inferred from electronic annotation	---
[truncated: 174 more rows]
